# Supplementary material for: Benchmarking Illumina and Oxford Nanopore Technologies (ONT) sequencing platforms for whole genome sequencing of bacterial genomes and use in clinical microbiology
Source: Research Square preprint supplement (doi:10.21203/rs.3.rs-7036422/v1), 2025-07-10
Supplement: Supplementary file 1 [file 8e6adacc44e8db080291416a.xlsx]

## Sheet: Read_me
Sheet	Description
Sheet 2	Acinetobacter baumannii - GTDBTk output summary
Sheet 3	Acinetobacter pitti - GTDBTk output summary
Sheet 4	Burkholderia stabilis - GTDBTk output summary
Sheet 5	Campylobacter jejuni - GTDBTk ouptut summary
Sheet 6	Enterococcus faecium - GTDBTk output summary
Sheet 7	Enterococus faecalis - GTDBTk output summary
Sheet 8	Escherichia coli - GTDBTk output summary
Sheet 9	Klebsiella pneumoniae - GTDBTk outptu summary
Sheet 10	Klebsiella quasipneumoniae - GTDBTk output summary
Sheet 11	Pseudomonas aeruginosa - GTDBTk output summary
Sheet 12	Staphylococcus aureus - GTDBTk output summary
Sheet 13	Streptococcus pyogenes - GTDBTk outptut summary
Headers	Description
user_genome	Unique identifer of genome taken from the FASTA file for the genome.
classification	GTDB taxonomy string inferred by the GTDB-Tk.
fastani_reference	Indicates the accession number of the closest reference genome as determine by ANI.
fastani_reference_radius	Indicates the accession number of the reference genome (species) to which a user genome was assigned based on ANI and AF.
fastani_taxonomy	Indicates the GTDB taxonomy of the above reference genome.
fastani_ani	Indicates the ANI between the query and above reference genome.
fastani_af	Indicates the AF between the query and above reference genome.
closest_placement_reference	Indicates the accession number of the reference genome when a genome is placed on a terminal branch.
closest_placement_radius	Indicates the species-specific ANI circumscription radius of the reference genomes used to determine if a query genome should be classified to the same species as the reference.
closest_placement_taxonomy	Indicates the GTDB taxonomy of the above reference genome.
closest_placement_ani	Indicates the ANI between the query and above reference genome.
closest_placement_af	Indicates the AF between the query and above reference genome.
pplacer_taxonomy	indicates the pplacer taxonomy of the query genome.
classification_method	Indicates the rule used to classify the genome.
note	provides additional information regarding the classification of the genome.
other_related_references(genome_id,species_name,radius,ANI,AF)	lists up to the 100 closest reference genomes based on ANI.
msa_percent	indicates the percentage of the MSA spanned by the genome (i.e. percentage of columns with an amino acid).
translation_table	Translation table used by Prodigal
red_value	indicates, when required, the relative evolutionary divergence (RED) for a query genome. RED is not calculated when a query genome can be classified based on ANI.
warnings	indicates unusual characteristics of the query genome that may impact the taxonomic assignment.

## Sheet: acibau
user_genome	classification	fastani_reference	fastani_reference_radius	fastani_taxonomy	fastani_ani	fastani_af	closest_placement_reference	closest_placement_radius	closest_placement_taxonomy	closest_placement_ani	closest_placement_af	pplacer_taxonomy	classification_method	note	other_related_references(genome_id,species_name,radius,ANI,AF)	msa_percent	translation_table	red_value	warnings
502578-21-lrp-R10-Rerio-SUP-new	d__Bacteria;p__Pseudomonadota;c__Gammaproteobacteria;o__Pseudomonadales;f__Moraxellaceae;g__Acinetobacter;s__Acinetobacter baumannii	GCF_009759685.1	95	d__Bacteria;p__Pseudomonadota;c__Gammaproteobacteria;o__Pseudomonadales;f__Moraxellaceae;g__Acinetobacter;s__Acinetobacter baumannii	97.89	0.872	GCF_009759685.1	95	d__Bacteria;p__Pseudomonadota;c__Gammaproteobacteria;o__Pseudomonadales;f__Moraxellaceae;g__Acinetobacter;s__Acinetobacter baumannii	97.89	0.872	d__Bacteria;p__Pseudomonadota;c__Gammaproteobacteria;o__Pseudomonadales;f__Moraxellaceae;g__Acinetobacter;s__	taxonomic classification defined by topology and ANI	topological placement and ANI have congruent species assignments	GCF_000368085.1, s__Acinetobacter nosocomialis, 95.0, 92.14, 0.857; GCF_000368065.1, s__Acinetobacter seifertii, 95.0, 90.38, 0.754; GCF_002928115.1, s__Acinetobacter pittii_H, 95.0, 89.2, 0.83; GCF_000369045.1, s__Acinetobacter pittii, 95.0, 89.09, 0.815; GCF_013009345.1, s__Acinetobacter geminorum, 95.0, 88.83, 0.796; GCF_001605885.1, s__Acinetobacter lactucae, 95.0, 88.59, 0.801; GCF_000399685…	98.83	11	N/A	N/A
502578-21-r_R9-Guppy-HAC-flye	d__Bacteria;p__Pseudomonadota;c__Gammaproteobacteria;o__Pseudomonadales;f__Moraxellaceae;g__Acinetobacter;s__Acinetobacter baumannii	GCF_009759685.1	95	d__Bacteria;p__Pseudomonadota;c__Gammaproteobacteria;o__Pseudomonadales;f__Moraxellaceae;g__Acinetobacter;s__Acinetobacter baumannii	97.85	0.871	GCF_009759685.1	95	d__Bacteria;p__Pseudomonadota;c__Gammaproteobacteria;o__Pseudomonadales;f__Moraxellaceae;g__Acinetobacter;s__Acinetobacter baumannii	97.85	0.871	d__Bacteria;p__Pseudomonadota;c__Gammaproteobacteria;o__Pseudomonadales;f__Moraxellaceae;g__Acinetobacter;s__	taxonomic classification defined by topology and ANI	topological placement and ANI have congruent species assignments	GCF_000368085.1, s__Acinetobacter nosocomialis, 95.0, 92.09, 0.856; GCF_000368065.1, s__Acinetobacter seifertii, 95.0, 90.36, 0.755; GCF_002928115.1, s__Acinetobacter pittii_H, 95.0, 89.14, 0.828; GCF_000369045.1, s__Acinetobacter pittii, 95.0, 89.1, 0.813; GCF_013009345.1, s__Acinetobacter geminorum, 95.0, 88.84, 0.792; GCF_001605885.1, s__Acinetobacter lactucae, 95.0, 88.61, 0.806; GCF_01334476…	98.29	11	N/A	N/A
502578-21-r-illumina-new	d__Bacteria;p__Pseudomonadota;c__Gammaproteobacteria;o__Pseudomonadales;f__Moraxellaceae;g__Acinetobacter;s__Acinetobacter baumannii	GCF_009759685.1	95	d__Bacteria;p__Pseudomonadota;c__Gammaproteobacteria;o__Pseudomonadales;f__Moraxellaceae;g__Acinetobacter;s__Acinetobacter baumannii	97.86	0.864	GCF_009759685.1	95	d__Bacteria;p__Pseudomonadota;c__Gammaproteobacteria;o__Pseudomonadales;f__Moraxellaceae;g__Acinetobacter;s__Acinetobacter baumannii	97.86	0.864	d__Bacteria;p__Pseudomonadota;c__Gammaproteobacteria;o__Pseudomonadales;f__Moraxellaceae;g__Acinetobacter;s__	taxonomic classification defined by topology and ANI	topological placement and ANI have congruent species assignments	GCF_000368085.1, s__Acinetobacter nosocomialis, 95.0, 92.07, 0.838; GCF_000368065.1, s__Acinetobacter seifertii, 95.0, 90.39, 0.789; GCF_000369045.1, s__Acinetobacter pittii, 95.0, 89.11, 0.802; GCF_002928115.1, s__Acinetobacter pittii_H, 95.0, 89.09, 0.823; GCF_013009345.1, s__Acinetobacter geminorum, 95.0, 88.82, 0.786; GCF_001605885.1, s__Acinetobacter lactucae, 95.0, 88.64, 0.801; GCF_0003996…	98.83	11	N/A	N/A
502578-21-r-lrp-R10-Dorado-FAST-new	d__Bacteria;p__Pseudomonadota;c__Gammaproteobacteria;o__Pseudomonadales;f__Moraxellaceae;g__Acinetobacter;s__Acinetobacter baumannii	GCF_009759685.1	95	d__Bacteria;p__Pseudomonadota;c__Gammaproteobacteria;o__Pseudomonadales;f__Moraxellaceae;g__Acinetobacter;s__Acinetobacter baumannii	97.89	0.872	GCF_009759685.1	95	d__Bacteria;p__Pseudomonadota;c__Gammaproteobacteria;o__Pseudomonadales;f__Moraxellaceae;g__Acinetobacter;s__Acinetobacter baumannii	97.89	0.872	d__Bacteria;p__Pseudomonadota;c__Gammaproteobacteria;o__Pseudomonadales;f__Moraxellaceae;g__Acinetobacter;s__	taxonomic classification defined by topology and ANI	topological placement and ANI have congruent species assignments	GCF_000368085.1, s__Acinetobacter nosocomialis, 95.0, 92.14, 0.856; GCF_000368065.1, s__Acinetobacter seifertii, 95.0, 90.4, 0.75; GCF_002928115.1, s__Acinetobacter pittii_H, 95.0, 89.2, 0.83; GCF_000369045.1, s__Acinetobacter pittii, 95.0, 89.1, 0.812; GCF_013009345.1, s__Acinetobacter geminorum, 95.0, 88.83, 0.795; GCF_001605885.1, s__Acinetobacter lactucae, 95.0, 88.59, 0.802; GCF_000399685.1,…	98.83	11	N/A	N/A
502578-21-r-lrp-R10-Dorado-HAC-new	d__Bacteria;p__Pseudomonadota;c__Gammaproteobacteria;o__Pseudomonadales;f__Moraxellaceae;g__Acinetobacter;s__Acinetobacter baumannii	GCF_009759685.1	95	d__Bacteria;p__Pseudomonadota;c__Gammaproteobacteria;o__Pseudomonadales;f__Moraxellaceae;g__Acinetobacter;s__Acinetobacter baumannii	97.89	0.871	GCF_009759685.1	95	d__Bacteria;p__Pseudomonadota;c__Gammaproteobacteria;o__Pseudomonadales;f__Moraxellaceae;g__Acinetobacter;s__Acinetobacter baumannii	97.89	0.871	d__Bacteria;p__Pseudomonadota;c__Gammaproteobacteria;o__Pseudomonadales;f__Moraxellaceae;g__Acinetobacter;s__	taxonomic classification defined by topology and ANI	topological placement and ANI have congruent species assignments	GCF_000368085.1, s__Acinetobacter nosocomialis, 95.0, 92.14, 0.856; GCF_000368065.1, s__Acinetobacter seifertii, 95.0, 90.38, 0.754; GCF_002928115.1, s__Acinetobacter pittii_H, 95.0, 89.2, 0.83; GCF_000369045.1, s__Acinetobacter pittii, 95.0, 89.09, 0.815; GCF_013009345.1, s__Acinetobacter geminorum, 95.0, 88.84, 0.796; GCF_001605885.1, s__Acinetobacter lactucae, 95.0, 88.59, 0.801; GCF_000399685…	98.83	11	N/A	N/A
502578-21-r-lrp-R10-Dorado-SUP-new	d__Bacteria;p__Pseudomonadota;c__Gammaproteobacteria;o__Pseudomonadales;f__Moraxellaceae;g__Acinetobacter;s__Acinetobacter baumannii	GCF_009759685.1	95	d__Bacteria;p__Pseudomonadota;c__Gammaproteobacteria;o__Pseudomonadales;f__Moraxellaceae;g__Acinetobacter;s__Acinetobacter baumannii	97.89	0.871	GCF_009759685.1	95	d__Bacteria;p__Pseudomonadota;c__Gammaproteobacteria;o__Pseudomonadales;f__Moraxellaceae;g__Acinetobacter;s__Acinetobacter baumannii	97.89	0.871	d__Bacteria;p__Pseudomonadota;c__Gammaproteobacteria;o__Pseudomonadales;f__Moraxellaceae;g__Acinetobacter;s__	taxonomic classification defined by topology and ANI	topological placement and ANI have congruent species assignments	GCF_000368085.1, s__Acinetobacter nosocomialis, 95.0, 92.14, 0.856; GCF_000368065.1, s__Acinetobacter seifertii, 95.0, 90.38, 0.754; GCF_002928115.1, s__Acinetobacter pittii_H, 95.0, 89.2, 0.83; GCF_000369045.1, s__Acinetobacter pittii, 95.0, 89.09, 0.815; GCF_013009345.1, s__Acinetobacter geminorum, 95.0, 88.84, 0.796; GCF_001605885.1, s__Acinetobacter lactucae, 95.0, 88.59, 0.801; GCF_000399685…	98.83	11	N/A	N/A
502578-21-r-lrp-R10-Guppy-FAST-new	d__Bacteria;p__Pseudomonadota;c__Gammaproteobacteria;o__Pseudomonadales;f__Moraxellaceae;g__Acinetobacter;s__Acinetobacter baumannii	GCF_009759685.1	95	d__Bacteria;p__Pseudomonadota;c__Gammaproteobacteria;o__Pseudomonadales;f__Moraxellaceae;g__Acinetobacter;s__Acinetobacter baumannii	97.89	0.873	GCF_009759685.1	95	d__Bacteria;p__Pseudomonadota;c__Gammaproteobacteria;o__Pseudomonadales;f__Moraxellaceae;g__Acinetobacter;s__Acinetobacter baumannii	97.89	0.873	d__Bacteria;p__Pseudomonadota;c__Gammaproteobacteria;o__Pseudomonadales;f__Moraxellaceae;g__Acinetobacter;s__	taxonomic classification defined by topology and ANI	topological placement and ANI have congruent species assignments	GCF_000368085.1, s__Acinetobacter nosocomialis, 95.0, 92.14, 0.857; GCF_000368065.1, s__Acinetobacter seifertii, 95.0, 90.39, 0.752; GCF_002928115.1, s__Acinetobacter pittii_H, 95.0, 89.2, 0.83; GCF_000369045.1, s__Acinetobacter pittii, 95.0, 89.1, 0.815; GCF_013009345.1, s__Acinetobacter geminorum, 95.0, 88.83, 0.796; GCF_001605885.1, s__Acinetobacter lactucae, 95.0, 88.59, 0.801; GCF_000399685.…	98.83	11	N/A	N/A
502578-21-r-lrp-R10-Guppy-HAC-new	d__Bacteria;p__Pseudomonadota;c__Gammaproteobacteria;o__Pseudomonadales;f__Moraxellaceae;g__Acinetobacter;s__Acinetobacter baumannii	GCF_009759685.1	95	d__Bacteria;p__Pseudomonadota;c__Gammaproteobacteria;o__Pseudomonadales;f__Moraxellaceae;g__Acinetobacter;s__Acinetobacter baumannii	97.89	0.873	GCF_009759685.1	95	d__Bacteria;p__Pseudomonadota;c__Gammaproteobacteria;o__Pseudomonadales;f__Moraxellaceae;g__Acinetobacter;s__Acinetobacter baumannii	97.89	0.873	d__Bacteria;p__Pseudomonadota;c__Gammaproteobacteria;o__Pseudomonadales;f__Moraxellaceae;g__Acinetobacter;s__	taxonomic classification defined by topology and ANI	topological placement and ANI have congruent species assignments	GCF_000368085.1, s__Acinetobacter nosocomialis, 95.0, 92.14, 0.857; GCF_000368065.1, s__Acinetobacter seifertii, 95.0, 90.39, 0.752; GCF_002928115.1, s__Acinetobacter pittii_H, 95.0, 89.2, 0.83; GCF_000369045.1, s__Acinetobacter pittii, 95.0, 89.1, 0.815; GCF_013009345.1, s__Acinetobacter geminorum, 95.0, 88.83, 0.796; GCF_001605885.1, s__Acinetobacter lactucae, 95.0, 88.59, 0.801; GCF_000399685.…	98.83	11	N/A	N/A
502578-21-r-lrp-R10-Guppy-SUP-new	d__Bacteria;p__Pseudomonadota;c__Gammaproteobacteria;o__Pseudomonadales;f__Moraxellaceae;g__Acinetobacter;s__Acinetobacter baumannii	GCF_009759685.1	95	d__Bacteria;p__Pseudomonadota;c__Gammaproteobacteria;o__Pseudomonadales;f__Moraxellaceae;g__Acinetobacter;s__Acinetobacter baumannii	97.89	0.872	GCF_009759685.1	95	d__Bacteria;p__Pseudomonadota;c__Gammaproteobacteria;o__Pseudomonadales;f__Moraxellaceae;g__Acinetobacter;s__Acinetobacter baumannii	97.89	0.872	d__Bacteria;p__Pseudomonadota;c__Gammaproteobacteria;o__Pseudomonadales;f__Moraxellaceae;g__Acinetobacter;s__	taxonomic classification defined by topology and ANI	topological placement and ANI have congruent species assignments	GCF_000368085.1, s__Acinetobacter nosocomialis, 95.0, 92.14, 0.857; GCF_000368065.1, s__Acinetobacter seifertii, 95.0, 90.38, 0.754; GCF_002928115.1, s__Acinetobacter pittii_H, 95.0, 89.2, 0.83; GCF_000369045.1, s__Acinetobacter pittii, 95.0, 89.09, 0.815; GCF_013009345.1, s__Acinetobacter geminorum, 95.0, 88.83, 0.796; GCF_001605885.1, s__Acinetobacter lactucae, 95.0, 88.59, 0.801; GCF_000399685…	98.83	11	N/A	N/A
502578-21-r-lrp-R9-Dorado-FAST-new	d__Bacteria;p__Pseudomonadota;c__Gammaproteobacteria;o__Pseudomonadales;f__Moraxellaceae;g__Acinetobacter;s__Acinetobacter baumannii	GCF_009759685.1	95	d__Bacteria;p__Pseudomonadota;c__Gammaproteobacteria;o__Pseudomonadales;f__Moraxellaceae;g__Acinetobacter;s__Acinetobacter baumannii	97.85	0.872	GCF_009759685.1	95	d__Bacteria;p__Pseudomonadota;c__Gammaproteobacteria;o__Pseudomonadales;f__Moraxellaceae;g__Acinetobacter;s__Acinetobacter baumannii	97.85	0.872	d__Bacteria;p__Pseudomonadota;c__Gammaproteobacteria;o__Pseudomonadales;f__Moraxellaceae;g__Acinetobacter;s__	taxonomic classification defined by topology and ANI	topological placement and ANI have congruent species assignments	GCF_000368085.1, s__Acinetobacter nosocomialis, 95.0, 92.05, 0.851; GCF_000368065.1, s__Acinetobacter seifertii, 95.0, 90.35, 0.761; GCF_002928115.1, s__Acinetobacter pittii_H, 95.0, 89.19, 0.831; GCF_000369045.1, s__Acinetobacter pittii, 95.0, 89.17, 0.827; GCF_013009345.1, s__Acinetobacter geminorum, 95.0, 88.87, 0.812; GCF_013344765.1, s__Acinetobacter lactucae_A, 95.0, 88.58, 0.855; GCF_00160…	98.83	11	N/A	N/A
502578-21-r-lrp-R9-Dorado-HAC-new	d__Bacteria;p__Pseudomonadota;c__Gammaproteobacteria;o__Pseudomonadales;f__Moraxellaceae;g__Acinetobacter;s__Acinetobacter baumannii	GCF_009759685.1	95	d__Bacteria;p__Pseudomonadota;c__Gammaproteobacteria;o__Pseudomonadales;f__Moraxellaceae;g__Acinetobacter;s__Acinetobacter baumannii	97.85	0.87	GCF_009759685.1	95	d__Bacteria;p__Pseudomonadota;c__Gammaproteobacteria;o__Pseudomonadales;f__Moraxellaceae;g__Acinetobacter;s__Acinetobacter baumannii	97.85	0.87	d__Bacteria;p__Pseudomonadota;c__Gammaproteobacteria;o__Pseudomonadales;f__Moraxellaceae;g__Acinetobacter;s__	taxonomic classification defined by topology and ANI	topological placement and ANI have congruent species assignments	GCF_000368085.1, s__Acinetobacter nosocomialis, 95.0, 92.03, 0.853; GCF_000368065.1, s__Acinetobacter seifertii, 95.0, 90.3, 0.764; GCF_002928115.1, s__Acinetobacter pittii_H, 95.0, 89.18, 0.829; GCF_000369045.1, s__Acinetobacter pittii, 95.0, 89.12, 0.823; GCF_013009345.1, s__Acinetobacter geminorum, 95.0, 88.88, 0.808; GCF_013344765.1, s__Acinetobacter lactucae_A, 95.0, 88.62, 0.852; GCF_001605…	98.83	11	N/A	N/A
502578-21-r-lrp-R9-Dorado-SUP-new	d__Bacteria;p__Pseudomonadota;c__Gammaproteobacteria;o__Pseudomonadales;f__Moraxellaceae;g__Acinetobacter;s__Acinetobacter baumannii	GCF_009759685.1	95	d__Bacteria;p__Pseudomonadota;c__Gammaproteobacteria;o__Pseudomonadales;f__Moraxellaceae;g__Acinetobacter;s__Acinetobacter baumannii	97.84	0.874	GCF_009759685.1	95	d__Bacteria;p__Pseudomonadota;c__Gammaproteobacteria;o__Pseudomonadales;f__Moraxellaceae;g__Acinetobacter;s__Acinetobacter baumannii	97.84	0.874	d__Bacteria;p__Pseudomonadota;c__Gammaproteobacteria;o__Pseudomonadales;f__Moraxellaceae;g__Acinetobacter;s__	taxonomic classification defined by topology and ANI	topological placement and ANI have congruent species assignments	GCF_000368085.1, s__Acinetobacter nosocomialis, 95.0, 92.04, 0.853; GCF_000368065.1, s__Acinetobacter seifertii, 95.0, 90.34, 0.758; GCF_002928115.1, s__Acinetobacter pittii_H, 95.0, 89.19, 0.829; GCF_000369045.1, s__Acinetobacter pittii, 95.0, 89.18, 0.823; GCF_013009345.1, s__Acinetobacter geminorum, 95.0, 88.88, 0.806; GCF_013344765.1, s__Acinetobacter lactucae_A, 95.0, 88.58, 0.852; GCF_00160…	98.83	11	N/A	N/A
502578-21-r-lrp-R9-Guppy-FAST-new	d__Bacteria;p__Pseudomonadota;c__Gammaproteobacteria;o__Pseudomonadales;f__Moraxellaceae;g__Acinetobacter;s__Acinetobacter baumannii	GCF_009759685.1	95	d__Bacteria;p__Pseudomonadota;c__Gammaproteobacteria;o__Pseudomonadales;f__Moraxellaceae;g__Acinetobacter;s__Acinetobacter baumannii	97.86	0.871	GCF_009759685.1	95	d__Bacteria;p__Pseudomonadota;c__Gammaproteobacteria;o__Pseudomonadales;f__Moraxellaceae;g__Acinetobacter;s__Acinetobacter baumannii	97.86	0.871	d__Bacteria;p__Pseudomonadota;c__Gammaproteobacteria;o__Pseudomonadales;f__Moraxellaceae;g__Acinetobacter;s__	taxonomic classification defined by topology and ANI	topological placement and ANI have congruent species assignments	GCF_000368085.1, s__Acinetobacter nosocomialis, 95.0, 92.12, 0.847; GCF_000368065.1, s__Acinetobacter seifertii, 95.0, 90.3, 0.764; GCF_002928115.1, s__Acinetobacter pittii_H, 95.0, 89.22, 0.836; GCF_000369045.1, s__Acinetobacter pittii, 95.0, 89.16, 0.82; GCF_013009345.1, s__Acinetobacter geminorum, 95.0, 88.88, 0.814; GCF_000399685.1, s__Acinetobacter pittii_E, 95.0, 88.58, 0.842; GCF_001605885…	98.83	11	N/A	N/A
502578-21-r-lrp-R9-Guppy-HAC-new	d__Bacteria;p__Pseudomonadota;c__Gammaproteobacteria;o__Pseudomonadales;f__Moraxellaceae;g__Acinetobacter;s__Acinetobacter baumannii	GCF_009759685.1	95	d__Bacteria;p__Pseudomonadota;c__Gammaproteobacteria;o__Pseudomonadales;f__Moraxellaceae;g__Acinetobacter;s__Acinetobacter baumannii	97.86	0.871	GCF_009759685.1	95	d__Bacteria;p__Pseudomonadota;c__Gammaproteobacteria;o__Pseudomonadales;f__Moraxellaceae;g__Acinetobacter;s__Acinetobacter baumannii	97.86	0.871	d__Bacteria;p__Pseudomonadota;c__Gammaproteobacteria;o__Pseudomonadales;f__Moraxellaceae;g__Acinetobacter;s__	taxonomic classification defined by topology and ANI	topological placement and ANI have congruent species assignments	GCF_000368085.1, s__Acinetobacter nosocomialis, 95.0, 92.12, 0.847; GCF_000368065.1, s__Acinetobacter seifertii, 95.0, 90.3, 0.764; GCF_002928115.1, s__Acinetobacter pittii_H, 95.0, 89.22, 0.836; GCF_000369045.1, s__Acinetobacter pittii, 95.0, 89.16, 0.82; GCF_013009345.1, s__Acinetobacter geminorum, 95.0, 88.88, 0.814; GCF_000399685.1, s__Acinetobacter pittii_E, 95.0, 88.58, 0.842; GCF_001605885…	98.83	11	N/A	N/A
502578-21-r-lrp-R9-Guppy-SUP-new	d__Bacteria;p__Pseudomonadota;c__Gammaproteobacteria;o__Pseudomonadales;f__Moraxellaceae;g__Acinetobacter;s__Acinetobacter baumannii	GCF_009759685.1	95	d__Bacteria;p__Pseudomonadota;c__Gammaproteobacteria;o__Pseudomonadales;f__Moraxellaceae;g__Acinetobacter;s__Acinetobacter baumannii	97.86	0.871	GCF_009759685.1	95	d__Bacteria;p__Pseudomonadota;c__Gammaproteobacteria;o__Pseudomonadales;f__Moraxellaceae;g__Acinetobacter;s__Acinetobacter baumannii	97.86	0.871	d__Bacteria;p__Pseudomonadota;c__Gammaproteobacteria;o__Pseudomonadales;f__Moraxellaceae;g__Acinetobacter;s__	taxonomic classification defined by topology and ANI	topological placement and ANI have congruent species assignments	GCF_000368085.1, s__Acinetobacter nosocomialis, 95.0, 92.12, 0.847; GCF_000368065.1, s__Acinetobacter seifertii, 95.0, 90.3, 0.764; GCF_002928115.1, s__Acinetobacter pittii_H, 95.0, 89.22, 0.836; GCF_000369045.1, s__Acinetobacter pittii, 95.0, 89.16, 0.82; GCF_013009345.1, s__Acinetobacter geminorum, 95.0, 88.88, 0.814; GCF_000399685.1, s__Acinetobacter pittii_E, 95.0, 88.58, 0.842; GCF_001605885…	98.83	11	N/A	N/A
502578-21-r-R10-Dorado-FAST-flye	d__Bacteria;p__Pseudomonadota;c__Gammaproteobacteria;o__Pseudomonadales;f__Moraxellaceae;g__Acinetobacter;s__Acinetobacter baumannii	GCF_009759685.1	95	d__Bacteria;p__Pseudomonadota;c__Gammaproteobacteria;o__Pseudomonadales;f__Moraxellaceae;g__Acinetobacter;s__Acinetobacter baumannii	97.64	0.875	GCF_009759685.1	95	d__Bacteria;p__Pseudomonadota;c__Gammaproteobacteria;o__Pseudomonadales;f__Moraxellaceae;g__Acinetobacter;s__Acinetobacter baumannii	97.64	0.875	d__Bacteria;p__Pseudomonadota;c__Gammaproteobacteria;o__Pseudomonadales;f__Moraxellaceae;g__Acinetobacter;s__	taxonomic classification defined by topology and ANI	topological placement and ANI have congruent species assignments	GCF_000368085.1, s__Acinetobacter nosocomialis, 95.0, 91.92, 0.849; GCF_000368065.1, s__Acinetobacter seifertii, 95.0, 90.29, 0.755; GCF_002928115.1, s__Acinetobacter pittii_H, 95.0, 88.99, 0.838; GCF_000369045.1, s__Acinetobacter pittii, 95.0, 88.92, 0.819; GCF_013009345.1, s__Acinetobacter geminorum, 95.0, 88.65, 0.796; GCF_001605885.1, s__Acinetobacter lactucae, 95.0, 88.49, 0.809; GCF_0133447…	83.26	11	N/A	N/A
502578-21-r-R10-Dorado-FAST-Medaka-2.0	d__Bacteria;p__Pseudomonadota;c__Gammaproteobacteria;o__Pseudomonadales;f__Moraxellaceae;g__Acinetobacter;s__Acinetobacter baumannii	GCF_009759685.1	95	d__Bacteria;p__Pseudomonadota;c__Gammaproteobacteria;o__Pseudomonadales;f__Moraxellaceae;g__Acinetobacter;s__Acinetobacter baumannii	97.67	0.872	GCF_009759685.1	95	d__Bacteria;p__Pseudomonadota;c__Gammaproteobacteria;o__Pseudomonadales;f__Moraxellaceae;g__Acinetobacter;s__Acinetobacter baumannii	97.67	0.872	d__Bacteria;p__Pseudomonadota;c__Gammaproteobacteria;o__Pseudomonadales;f__Moraxellaceae;g__Acinetobacter;s__	taxonomic classification defined by topology and ANI	topological placement and ANI have congruent species assignments	GCF_000368085.1, s__Acinetobacter nosocomialis, 95.0, 91.93, 0.85; GCF_000368065.1, s__Acinetobacter seifertii, 95.0, 90.32, 0.755; GCF_002928115.1, s__Acinetobacter pittii_H, 95.0, 89.06, 0.835; GCF_000369045.1, s__Acinetobacter pittii, 95.0, 88.91, 0.819; GCF_013009345.1, s__Acinetobacter geminorum, 95.0, 88.65, 0.8; GCF_001605885.1, s__Acinetobacter lactucae, 95.0, 88.5, 0.805; GCF_013344765.1…	77.32	11	N/A	N/A
502578-21-r-R10-Dorado-FAST-new	d__Bacteria;p__Pseudomonadota;c__Gammaproteobacteria;o__Pseudomonadales;f__Moraxellaceae;g__Acinetobacter;s__Acinetobacter baumannii	GCF_009759685.1	95	d__Bacteria;p__Pseudomonadota;c__Gammaproteobacteria;o__Pseudomonadales;f__Moraxellaceae;g__Acinetobacter;s__Acinetobacter baumannii	97.84	0.874	GCF_009759685.1	95	d__Bacteria;p__Pseudomonadota;c__Gammaproteobacteria;o__Pseudomonadales;f__Moraxellaceae;g__Acinetobacter;s__Acinetobacter baumannii	97.84	0.874	d__Bacteria;p__Pseudomonadota;c__Gammaproteobacteria;o__Pseudomonadales;f__Moraxellaceae;g__Acinetobacter;s__	taxonomic classification defined by topology and ANI	topological placement and ANI have congruent species assignments	GCF_000368085.1, s__Acinetobacter nosocomialis, 95.0, 92.05, 0.863; GCF_000368065.1, s__Acinetobacter seifertii, 95.0, 90.32, 0.764; GCF_002928115.1, s__Acinetobacter pittii_H, 95.0, 89.25, 0.833; GCF_000369045.1, s__Acinetobacter pittii, 95.0, 89.08, 0.812; GCF_013009345.1, s__Acinetobacter geminorum, 95.0, 88.76, 0.805; GCF_013344765.1, s__Acinetobacter lactucae_A, 95.0, 88.61, 0.862; GCF_00039…	93.82	11	N/A	N/A
502578-21-r-R10-Dorado-HAC-flye	d__Bacteria;p__Pseudomonadota;c__Gammaproteobacteria;o__Pseudomonadales;f__Moraxellaceae;g__Acinetobacter;s__Acinetobacter baumannii	GCF_009759685.1	95	d__Bacteria;p__Pseudomonadota;c__Gammaproteobacteria;o__Pseudomonadales;f__Moraxellaceae;g__Acinetobacter;s__Acinetobacter baumannii	97.83	0.875	GCF_009759685.1	95	d__Bacteria;p__Pseudomonadota;c__Gammaproteobacteria;o__Pseudomonadales;f__Moraxellaceae;g__Acinetobacter;s__Acinetobacter baumannii	97.83	0.875	d__Bacteria;p__Pseudomonadota;c__Gammaproteobacteria;o__Pseudomonadales;f__Moraxellaceae;g__Acinetobacter;s__	taxonomic classification defined by topology and ANI	topological placement and ANI have congruent species assignments	GCF_000368085.1, s__Acinetobacter nosocomialis, 95.0, 92.06, 0.854; GCF_000368065.1, s__Acinetobacter seifertii, 95.0, 90.36, 0.756; GCF_002928115.1, s__Acinetobacter pittii_H, 95.0, 89.17, 0.83; GCF_000369045.1, s__Acinetobacter pittii, 95.0, 89.16, 0.823; GCF_013009345.1, s__Acinetobacter geminorum, 95.0, 88.82, 0.81; GCF_001605885.1, s__Acinetobacter lactucae, 95.0, 88.67, 0.809; GCF_000399685…	98.35	11	N/A	N/A
502578-21-r-R10-Dorado-HAC-Medaka-2.0	d__Bacteria;p__Pseudomonadota;c__Gammaproteobacteria;o__Pseudomonadales;f__Moraxellaceae;g__Acinetobacter;s__Acinetobacter baumannii	GCF_009759685.1	95	d__Bacteria;p__Pseudomonadota;c__Gammaproteobacteria;o__Pseudomonadales;f__Moraxellaceae;g__Acinetobacter;s__Acinetobacter baumannii	97.84	0.873	GCF_009759685.1	95	d__Bacteria;p__Pseudomonadota;c__Gammaproteobacteria;o__Pseudomonadales;f__Moraxellaceae;g__Acinetobacter;s__Acinetobacter baumannii	97.84	0.873	d__Bacteria;p__Pseudomonadota;c__Gammaproteobacteria;o__Pseudomonadales;f__Moraxellaceae;g__Acinetobacter;s__	taxonomic classification defined by topology and ANI	topological placement and ANI have congruent species assignments	GCF_000368085.1, s__Acinetobacter nosocomialis, 95.0, 92.06, 0.853; GCF_000368065.1, s__Acinetobacter seifertii, 95.0, 90.33, 0.757; GCF_000369045.1, s__Acinetobacter pittii, 95.0, 89.21, 0.826; GCF_002928115.1, s__Acinetobacter pittii_H, 95.0, 89.19, 0.823; GCF_013009345.1, s__Acinetobacter geminorum, 95.0, 88.79, 0.805; GCF_001605885.1, s__Acinetobacter lactucae, 95.0, 88.64, 0.809; GCF_0133447…	98.83	11	N/A	N/A
502578-21-r-R10-Dorado-HAC-new	d__Bacteria;p__Pseudomonadota;c__Gammaproteobacteria;o__Pseudomonadales;f__Moraxellaceae;g__Acinetobacter;s__Acinetobacter baumannii	GCF_009759685.1	95	d__Bacteria;p__Pseudomonadota;c__Gammaproteobacteria;o__Pseudomonadales;f__Moraxellaceae;g__Acinetobacter;s__Acinetobacter baumannii	97.85	0.874	GCF_009759685.1	95	d__Bacteria;p__Pseudomonadota;c__Gammaproteobacteria;o__Pseudomonadales;f__Moraxellaceae;g__Acinetobacter;s__Acinetobacter baumannii	97.85	0.874	d__Bacteria;p__Pseudomonadota;c__Gammaproteobacteria;o__Pseudomonadales;f__Moraxellaceae;g__Acinetobacter;s__	taxonomic classification defined by topology and ANI	topological placement and ANI have congruent species assignments	GCF_000368085.1, s__Acinetobacter nosocomialis, 95.0, 92.1, 0.849; GCF_000368065.1, s__Acinetobacter seifertii, 95.0, 90.35, 0.756; GCF_002928115.1, s__Acinetobacter pittii_H, 95.0, 89.18, 0.823; GCF_000369045.1, s__Acinetobacter pittii, 95.0, 89.18, 0.82; GCF_013009345.1, s__Acinetobacter geminorum, 95.0, 88.81, 0.806; GCF_001605885.1, s__Acinetobacter lactucae, 95.0, 88.66, 0.808; GCF_013344765…	98.83	11	N/A	N/A
502578-21-r-R10-Dorado-SUP-flye	d__Bacteria;p__Pseudomonadota;c__Gammaproteobacteria;o__Pseudomonadales;f__Moraxellaceae;g__Acinetobacter;s__Acinetobacter baumannii	GCF_009759685.1	95	d__Bacteria;p__Pseudomonadota;c__Gammaproteobacteria;o__Pseudomonadales;f__Moraxellaceae;g__Acinetobacter;s__Acinetobacter baumannii	97.85	0.874	GCF_009759685.1	95	d__Bacteria;p__Pseudomonadota;c__Gammaproteobacteria;o__Pseudomonadales;f__Moraxellaceae;g__Acinetobacter;s__Acinetobacter baumannii	97.85	0.874	d__Bacteria;p__Pseudomonadota;c__Gammaproteobacteria;o__Pseudomonadales;f__Moraxellaceae;g__Acinetobacter;s__	taxonomic classification defined by topology and ANI	topological placement and ANI have congruent species assignments	GCF_000368085.1, s__Acinetobacter nosocomialis, 95.0, 92.04, 0.859; GCF_000368065.1, s__Acinetobacter seifertii, 95.0, 90.37, 0.755; GCF_002928115.1, s__Acinetobacter pittii_H, 95.0, 89.2, 0.826; GCF_000369045.1, s__Acinetobacter pittii, 95.0, 89.19, 0.826; GCF_013009345.1, s__Acinetobacter geminorum, 95.0, 88.83, 0.806; GCF_001605885.1, s__Acinetobacter lactucae, 95.0, 88.64, 0.812; GCF_01334476…	98.83	11	N/A	N/A
502578-21-r-R10-Dorado-SUP-Medaka-2.0	d__Bacteria;p__Pseudomonadota;c__Gammaproteobacteria;o__Pseudomonadales;f__Moraxellaceae;g__Acinetobacter;s__Acinetobacter baumannii	GCF_009759685.1	95	d__Bacteria;p__Pseudomonadota;c__Gammaproteobacteria;o__Pseudomonadales;f__Moraxellaceae;g__Acinetobacter;s__Acinetobacter baumannii	97.85	0.874	GCF_009759685.1	95	d__Bacteria;p__Pseudomonadota;c__Gammaproteobacteria;o__Pseudomonadales;f__Moraxellaceae;g__Acinetobacter;s__Acinetobacter baumannii	97.85	0.874	d__Bacteria;p__Pseudomonadota;c__Gammaproteobacteria;o__Pseudomonadales;f__Moraxellaceae;g__Acinetobacter;s__	taxonomic classification defined by topology and ANI	topological placement and ANI have congruent species assignments	GCF_000368085.1, s__Acinetobacter nosocomialis, 95.0, 92.06, 0.85; GCF_000368065.1, s__Acinetobacter seifertii, 95.0, 90.34, 0.754; GCF_000369045.1, s__Acinetobacter pittii, 95.0, 89.17, 0.824; GCF_002928115.1, s__Acinetobacter pittii_H, 95.0, 89.15, 0.826; GCF_013009345.1, s__Acinetobacter geminorum, 95.0, 88.75, 0.806; GCF_001605885.1, s__Acinetobacter lactucae, 95.0, 88.62, 0.805; GCF_01334476…	98.83	11	N/A	N/A
502578-21-r-R10-Dorado-SUP-new	d__Bacteria;p__Pseudomonadota;c__Gammaproteobacteria;o__Pseudomonadales;f__Moraxellaceae;g__Acinetobacter;s__Acinetobacter baumannii	GCF_009759685.1	95	d__Bacteria;p__Pseudomonadota;c__Gammaproteobacteria;o__Pseudomonadales;f__Moraxellaceae;g__Acinetobacter;s__Acinetobacter baumannii	97.86	0.874	GCF_009759685.1	95	d__Bacteria;p__Pseudomonadota;c__Gammaproteobacteria;o__Pseudomonadales;f__Moraxellaceae;g__Acinetobacter;s__Acinetobacter baumannii	97.86	0.874	d__Bacteria;p__Pseudomonadota;c__Gammaproteobacteria;o__Pseudomonadales;f__Moraxellaceae;g__Acinetobacter;s__	taxonomic classification defined by topology and ANI	topological placement and ANI have congruent species assignments	GCF_000368085.1, s__Acinetobacter nosocomialis, 95.0, 92.1, 0.846; GCF_000368065.1, s__Acinetobacter seifertii, 95.0, 90.36, 0.754; GCF_000369045.1, s__Acinetobacter pittii, 95.0, 89.18, 0.823; GCF_002928115.1, s__Acinetobacter pittii_H, 95.0, 89.16, 0.823; GCF_013009345.1, s__Acinetobacter geminorum, 95.0, 88.76, 0.805; GCF_001605885.1, s__Acinetobacter lactucae, 95.0, 88.65, 0.805; GCF_01334476…	98.83	11	N/A	N/A
502578-21-r-R10-Guppy-FAST-flye	d__Bacteria;p__Pseudomonadota;c__Gammaproteobacteria;o__Pseudomonadales;f__Moraxellaceae;g__Acinetobacter;s__Acinetobacter baumannii	GCF_009759685.1	95	d__Bacteria;p__Pseudomonadota;c__Gammaproteobacteria;o__Pseudomonadales;f__Moraxellaceae;g__Acinetobacter;s__Acinetobacter baumannii	97.64	0.876	GCF_009759685.1	95	d__Bacteria;p__Pseudomonadota;c__Gammaproteobacteria;o__Pseudomonadales;f__Moraxellaceae;g__Acinetobacter;s__Acinetobacter baumannii	97.64	0.876	d__Bacteria;p__Pseudomonadota;c__Gammaproteobacteria;o__Pseudomonadales;f__Moraxellaceae;g__Acinetobacter;s__	taxonomic classification defined by topology and ANI	topological placement and ANI have congruent species assignments	GCF_000368085.1, s__Acinetobacter nosocomialis, 95.0, 91.9, 0.856; GCF_000368065.1, s__Acinetobacter seifertii, 95.0, 90.2, 0.757; GCF_002928115.1, s__Acinetobacter pittii_H, 95.0, 89.03, 0.839; GCF_000369045.1, s__Acinetobacter pittii, 95.0, 88.94, 0.813; GCF_013009345.1, s__Acinetobacter geminorum, 95.0, 88.64, 0.807; GCF_013344765.1, s__Acinetobacter lactucae_A, 95.0, 88.55, 0.855; GCF_0016058…	81.13	11	N/A	N/A
502578-21-r-R10-Guppy-FAST-Medaka-2.0	d__Bacteria;p__Pseudomonadota;c__Gammaproteobacteria;o__Pseudomonadales;f__Moraxellaceae;g__Acinetobacter;s__Acinetobacter baumannii	GCF_009759685.1	95	d__Bacteria;p__Pseudomonadota;c__Gammaproteobacteria;o__Pseudomonadales;f__Moraxellaceae;g__Acinetobacter;s__Acinetobacter baumannii	97.65	0.873	GCF_009759685.1	95	d__Bacteria;p__Pseudomonadota;c__Gammaproteobacteria;o__Pseudomonadales;f__Moraxellaceae;g__Acinetobacter;s__Acinetobacter baumannii	97.65	0.873	d__Bacteria;p__Pseudomonadota;c__Gammaproteobacteria;o__Pseudomonadales;f__Moraxellaceae;g__Acinetobacter;s__	taxonomic classification defined by topology and ANI	topological placement and ANI have congruent species assignments	GCF_000368085.1, s__Acinetobacter nosocomialis, 95.0, 91.9, 0.858; GCF_000368065.1, s__Acinetobacter seifertii, 95.0, 90.18, 0.759; GCF_002928115.1, s__Acinetobacter pittii_H, 95.0, 89.07, 0.83; GCF_000369045.1, s__Acinetobacter pittii, 95.0, 88.95, 0.814; GCF_013009345.1, s__Acinetobacter geminorum, 95.0, 88.66, 0.8; GCF_001605885.1, s__Acinetobacter lactucae, 95.0, 88.51, 0.8; GCF_000399685.1, …	77.99	11	N/A	N/A
502578-21-r-R10-Guppy-FAST-new	d__Bacteria;p__Pseudomonadota;c__Gammaproteobacteria;o__Pseudomonadales;f__Moraxellaceae;g__Acinetobacter;s__Acinetobacter baumannii	GCF_009759685.1	95	d__Bacteria;p__Pseudomonadota;c__Gammaproteobacteria;o__Pseudomonadales;f__Moraxellaceae;g__Acinetobacter;s__Acinetobacter baumannii	97.79	0.871	GCF_009759685.1	95	d__Bacteria;p__Pseudomonadota;c__Gammaproteobacteria;o__Pseudomonadales;f__Moraxellaceae;g__Acinetobacter;s__Acinetobacter baumannii	97.79	0.871	d__Bacteria;p__Pseudomonadota;c__Gammaproteobacteria;o__Pseudomonadales;f__Moraxellaceae;g__Acinetobacter;s__	taxonomic classification defined by topology and ANI	topological placement and ANI have congruent species assignments	GCF_000368085.1, s__Acinetobacter nosocomialis, 95.0, 92.0, 0.862; GCF_000368065.1, s__Acinetobacter seifertii, 95.0, 90.32, 0.757; GCF_002928115.1, s__Acinetobacter pittii_H, 95.0, 89.14, 0.834; GCF_000369045.1, s__Acinetobacter pittii, 95.0, 89.1, 0.826; GCF_013009345.1, s__Acinetobacter geminorum, 95.0, 88.78, 0.811; GCF_001605885.1, s__Acinetobacter lactucae, 95.0, 88.56, 0.806; GCF_000399685…	95.53	11	N/A	N/A
502578-21-r-R10-Guppy-HAC-flye	d__Bacteria;p__Pseudomonadota;c__Gammaproteobacteria;o__Pseudomonadales;f__Moraxellaceae;g__Acinetobacter;s__Acinetobacter baumannii	GCF_009759685.1	95	d__Bacteria;p__Pseudomonadota;c__Gammaproteobacteria;o__Pseudomonadales;f__Moraxellaceae;g__Acinetobacter;s__Acinetobacter baumannii	97.85	0.873	GCF_009759685.1	95	d__Bacteria;p__Pseudomonadota;c__Gammaproteobacteria;o__Pseudomonadales;f__Moraxellaceae;g__Acinetobacter;s__Acinetobacter baumannii	97.85	0.873	d__Bacteria;p__Pseudomonadota;c__Gammaproteobacteria;o__Pseudomonadales;f__Moraxellaceae;g__Acinetobacter;s__	taxonomic classification defined by topology and ANI	topological placement and ANI have congruent species assignments	GCF_000368085.1, s__Acinetobacter nosocomialis, 95.0, 92.05, 0.846; GCF_000368065.1, s__Acinetobacter seifertii, 95.0, 90.41, 0.759; GCF_002928115.1, s__Acinetobacter pittii_H, 95.0, 89.2, 0.82; GCF_000369045.1, s__Acinetobacter pittii, 95.0, 89.08, 0.821; GCF_013009345.1, s__Acinetobacter geminorum, 95.0, 88.74, 0.802; GCF_001605885.1, s__Acinetobacter lactucae, 95.0, 88.61, 0.811; GCF_013344765…	98.55	11	N/A	N/A
502578-21-r-R10-Guppy-HAC-Medaka-2.0	d__Bacteria;p__Pseudomonadota;c__Gammaproteobacteria;o__Pseudomonadales;f__Moraxellaceae;g__Acinetobacter;s__Acinetobacter baumannii	GCF_009759685.1	95	d__Bacteria;p__Pseudomonadota;c__Gammaproteobacteria;o__Pseudomonadales;f__Moraxellaceae;g__Acinetobacter;s__Acinetobacter baumannii	97.84	0.871	GCF_009759685.1	95	d__Bacteria;p__Pseudomonadota;c__Gammaproteobacteria;o__Pseudomonadales;f__Moraxellaceae;g__Acinetobacter;s__Acinetobacter baumannii	97.84	0.871	d__Bacteria;p__Pseudomonadota;c__Gammaproteobacteria;o__Pseudomonadales;f__Moraxellaceae;g__Acinetobacter;s__	taxonomic classification defined by topology and ANI	topological placement and ANI have congruent species assignments	GCF_000368085.1, s__Acinetobacter nosocomialis, 95.0, 92.04, 0.848; GCF_000368065.1, s__Acinetobacter seifertii, 95.0, 90.41, 0.76; GCF_002928115.1, s__Acinetobacter pittii_H, 95.0, 89.22, 0.82; GCF_000369045.1, s__Acinetobacter pittii, 95.0, 89.1, 0.821; GCF_013009345.1, s__Acinetobacter geminorum, 95.0, 88.74, 0.802; GCF_001605885.1, s__Acinetobacter lactucae, 95.0, 88.6, 0.81; GCF_013344765.1,…	98.73	11	N/A	N/A
502578-21-r-R10-Guppy-HAC-new	d__Bacteria;p__Pseudomonadota;c__Gammaproteobacteria;o__Pseudomonadales;f__Moraxellaceae;g__Acinetobacter;s__Acinetobacter baumannii	GCF_009759685.1	95	d__Bacteria;p__Pseudomonadota;c__Gammaproteobacteria;o__Pseudomonadales;f__Moraxellaceae;g__Acinetobacter;s__Acinetobacter baumannii	97.85	0.872	GCF_009759685.1	95	d__Bacteria;p__Pseudomonadota;c__Gammaproteobacteria;o__Pseudomonadales;f__Moraxellaceae;g__Acinetobacter;s__Acinetobacter baumannii	97.85	0.872	d__Bacteria;p__Pseudomonadota;c__Gammaproteobacteria;o__Pseudomonadales;f__Moraxellaceae;g__Acinetobacter;s__	taxonomic classification defined by topology and ANI	topological placement and ANI have congruent species assignments	GCF_000368085.1, s__Acinetobacter nosocomialis, 95.0, 92.05, 0.849; GCF_000368065.1, s__Acinetobacter seifertii, 95.0, 90.41, 0.76; GCF_002928115.1, s__Acinetobacter pittii_H, 95.0, 89.22, 0.821; GCF_000369045.1, s__Acinetobacter pittii, 95.0, 89.08, 0.822; GCF_013009345.1, s__Acinetobacter geminorum, 95.0, 88.74, 0.803; GCF_001605885.1, s__Acinetobacter lactucae, 95.0, 88.6, 0.81; GCF_013344765.…	98.55	11	N/A	N/A
502578-21-r-R10-Guppy-SUP-flye	d__Bacteria;p__Pseudomonadota;c__Gammaproteobacteria;o__Pseudomonadales;f__Moraxellaceae;g__Acinetobacter;s__Acinetobacter baumannii	GCF_009759685.1	95	d__Bacteria;p__Pseudomonadota;c__Gammaproteobacteria;o__Pseudomonadales;f__Moraxellaceae;g__Acinetobacter;s__Acinetobacter baumannii	97.87	0.877	GCF_009759685.1	95	d__Bacteria;p__Pseudomonadota;c__Gammaproteobacteria;o__Pseudomonadales;f__Moraxellaceae;g__Acinetobacter;s__Acinetobacter baumannii	97.87	0.877	d__Bacteria;p__Pseudomonadota;c__Gammaproteobacteria;o__Pseudomonadales;f__Moraxellaceae;g__Acinetobacter;s__	taxonomic classification defined by topology and ANI	topological placement and ANI have congruent species assignments	GCF_000368085.1, s__Acinetobacter nosocomialis, 95.0, 92.08, 0.856; GCF_000368065.1, s__Acinetobacter seifertii, 95.0, 90.38, 0.753; GCF_002928115.1, s__Acinetobacter pittii_H, 95.0, 89.23, 0.827; GCF_000369045.1, s__Acinetobacter pittii, 95.0, 89.04, 0.819; GCF_013009345.1, s__Acinetobacter geminorum, 95.0, 88.76, 0.804; GCF_001605885.1, s__Acinetobacter lactucae, 95.0, 88.64, 0.806; GCF_0133447…	98.83	11	N/A	N/A
502578-21-r-R10-Guppy-SUP-Medaka-2.0	d__Bacteria;p__Pseudomonadota;c__Gammaproteobacteria;o__Pseudomonadales;f__Moraxellaceae;g__Acinetobacter;s__Acinetobacter baumannii	GCF_009759685.1	95	d__Bacteria;p__Pseudomonadota;c__Gammaproteobacteria;o__Pseudomonadales;f__Moraxellaceae;g__Acinetobacter;s__Acinetobacter baumannii	97.83	0.874	GCF_009759685.1	95	d__Bacteria;p__Pseudomonadota;c__Gammaproteobacteria;o__Pseudomonadales;f__Moraxellaceae;g__Acinetobacter;s__Acinetobacter baumannii	97.83	0.874	d__Bacteria;p__Pseudomonadota;c__Gammaproteobacteria;o__Pseudomonadales;f__Moraxellaceae;g__Acinetobacter;s__	taxonomic classification defined by topology and ANI	topological placement and ANI have congruent species assignments	GCF_000368085.1, s__Acinetobacter nosocomialis, 95.0, 92.03, 0.855; GCF_000368065.1, s__Acinetobacter seifertii, 95.0, 90.41, 0.755; GCF_002928115.1, s__Acinetobacter pittii_H, 95.0, 89.2, 0.832; GCF_000369045.1, s__Acinetobacter pittii, 95.0, 89.13, 0.805; GCF_013009345.1, s__Acinetobacter geminorum, 95.0, 88.8, 0.797; GCF_001605885.1, s__Acinetobacter lactucae, 95.0, 88.64, 0.806; GCF_000399685…	98.83	11	N/A	N/A
502578-21-r-R10-Guppy-SUP-new	d__Bacteria;p__Pseudomonadota;c__Gammaproteobacteria;o__Pseudomonadales;f__Moraxellaceae;g__Acinetobacter;s__Acinetobacter baumannii	GCF_009759685.1	95	d__Bacteria;p__Pseudomonadota;c__Gammaproteobacteria;o__Pseudomonadales;f__Moraxellaceae;g__Acinetobacter;s__Acinetobacter baumannii	97.83	0.873	GCF_009759685.1	95	d__Bacteria;p__Pseudomonadota;c__Gammaproteobacteria;o__Pseudomonadales;f__Moraxellaceae;g__Acinetobacter;s__Acinetobacter baumannii	97.83	0.873	d__Bacteria;p__Pseudomonadota;c__Gammaproteobacteria;o__Pseudomonadales;f__Moraxellaceae;g__Acinetobacter;s__	taxonomic classification defined by topology and ANI	topological placement and ANI have congruent species assignments	GCF_000368085.1, s__Acinetobacter nosocomialis, 95.0, 92.02, 0.857; GCF_000368065.1, s__Acinetobacter seifertii, 95.0, 90.4, 0.756; GCF_002928115.1, s__Acinetobacter pittii_H, 95.0, 89.19, 0.83; GCF_000369045.1, s__Acinetobacter pittii, 95.0, 89.05, 0.807; GCF_013009345.1, s__Acinetobacter geminorum, 95.0, 88.79, 0.798; GCF_001605885.1, s__Acinetobacter lactucae, 95.0, 88.64, 0.803; GCF_000399685…	98.83	11	N/A	N/A
502578-21-r-R10-Rerio-SUP-new	d__Bacteria;p__Pseudomonadota;c__Gammaproteobacteria;o__Pseudomonadales;f__Moraxellaceae;g__Acinetobacter;s__Acinetobacter baumannii	GCF_009759685.1	95	d__Bacteria;p__Pseudomonadota;c__Gammaproteobacteria;o__Pseudomonadales;f__Moraxellaceae;g__Acinetobacter;s__Acinetobacter baumannii	97.85	0.877	GCF_009759685.1	95	d__Bacteria;p__Pseudomonadota;c__Gammaproteobacteria;o__Pseudomonadales;f__Moraxellaceae;g__Acinetobacter;s__Acinetobacter baumannii	97.85	0.877	d__Bacteria;p__Pseudomonadota;c__Gammaproteobacteria;o__Pseudomonadales;f__Moraxellaceae;g__Acinetobacter;s__	taxonomic classification defined by topology and ANI	topological placement and ANI have congruent species assignments	GCF_000368085.1, s__Acinetobacter nosocomialis, 95.0, 92.13, 0.846; GCF_000368065.1, s__Acinetobacter seifertii, 95.0, 90.4, 0.749; GCF_002928115.1, s__Acinetobacter pittii_H, 95.0, 89.15, 0.824; GCF_000369045.1, s__Acinetobacter pittii, 95.0, 89.11, 0.819; GCF_013009345.1, s__Acinetobacter geminorum, 95.0, 88.81, 0.802; GCF_001605885.1, s__Acinetobacter lactucae, 95.0, 88.61, 0.807; GCF_01334476…	98.83	11	N/A	N/A
502578-21-r-R9-Dorado-FAST-flye	d__Bacteria;p__Pseudomonadota;c__Gammaproteobacteria;o__Pseudomonadales;f__Moraxellaceae;g__Acinetobacter;s__Acinetobacter baumannii	GCF_009759685.1	95	d__Bacteria;p__Pseudomonadota;c__Gammaproteobacteria;o__Pseudomonadales;f__Moraxellaceae;g__Acinetobacter;s__Acinetobacter baumannii	97.76	0.868	GCF_009759685.1	95	d__Bacteria;p__Pseudomonadota;c__Gammaproteobacteria;o__Pseudomonadales;f__Moraxellaceae;g__Acinetobacter;s__Acinetobacter baumannii	97.76	0.868	d__Bacteria;p__Pseudomonadota;c__Gammaproteobacteria;o__Pseudomonadales;f__Moraxellaceae;g__Acinetobacter;s__	taxonomic classification defined by topology and ANI	topological placement and ANI have congruent species assignments	GCF_000368085.1, s__Acinetobacter nosocomialis, 95.0, 91.99, 0.853; GCF_000368065.1, s__Acinetobacter seifertii, 95.0, 90.32, 0.744; GCF_002928115.1, s__Acinetobacter pittii_H, 95.0, 89.15, 0.834; GCF_000369045.1, s__Acinetobacter pittii, 95.0, 89.07, 0.806; GCF_013009345.1, s__Acinetobacter geminorum, 95.0, 88.76, 0.812; GCF_013344765.1, s__Acinetobacter lactucae_A, 95.0, 88.6, 0.858; GCF_001605…	93.6	11	N/A	N/A
502578-21-r-R9-Dorado-FAST-new	d__Bacteria;p__Pseudomonadota;c__Gammaproteobacteria;o__Pseudomonadales;f__Moraxellaceae;g__Acinetobacter;s__Acinetobacter baumannii	GCF_009759685.1	95	d__Bacteria;p__Pseudomonadota;c__Gammaproteobacteria;o__Pseudomonadales;f__Moraxellaceae;g__Acinetobacter;s__Acinetobacter baumannii	97.78	0.872	GCF_009759685.1	95	d__Bacteria;p__Pseudomonadota;c__Gammaproteobacteria;o__Pseudomonadales;f__Moraxellaceae;g__Acinetobacter;s__Acinetobacter baumannii	97.78	0.872	d__Bacteria;p__Pseudomonadota;c__Gammaproteobacteria;o__Pseudomonadales;f__Moraxellaceae;g__Acinetobacter;s__	taxonomic classification defined by topology and ANI	topological placement and ANI have congruent species assignments	GCF_000368085.1, s__Acinetobacter nosocomialis, 95.0, 92.03, 0.852; GCF_000368065.1, s__Acinetobacter seifertii, 95.0, 90.35, 0.746; GCF_002928115.1, s__Acinetobacter pittii_H, 95.0, 89.22, 0.832; GCF_000369045.1, s__Acinetobacter pittii, 95.0, 89.05, 0.808; GCF_013009345.1, s__Acinetobacter geminorum, 95.0, 88.84, 0.809; GCF_013344765.1, s__Acinetobacter lactucae_A, 95.0, 88.58, 0.854; GCF_00160…	97.91	11	N/A	N/A
502578-21-r-R9-Dorado-HAC-flye	d__Bacteria;p__Pseudomonadota;c__Gammaproteobacteria;o__Pseudomonadales;f__Moraxellaceae;g__Acinetobacter;s__Acinetobacter baumannii	GCF_009759685.1	95	d__Bacteria;p__Pseudomonadota;c__Gammaproteobacteria;o__Pseudomonadales;f__Moraxellaceae;g__Acinetobacter;s__Acinetobacter baumannii	97.79	0.869	GCF_009759685.1	95	d__Bacteria;p__Pseudomonadota;c__Gammaproteobacteria;o__Pseudomonadales;f__Moraxellaceae;g__Acinetobacter;s__Acinetobacter baumannii	97.79	0.869	d__Bacteria;p__Pseudomonadota;c__Gammaproteobacteria;o__Pseudomonadales;f__Moraxellaceae;g__Acinetobacter;s__	taxonomic classification defined by topology and ANI	topological placement and ANI have congruent species assignments	GCF_000368085.1, s__Acinetobacter nosocomialis, 95.0, 92.06, 0.853; GCF_000368065.1, s__Acinetobacter seifertii, 95.0, 90.38, 0.748; GCF_002928115.1, s__Acinetobacter pittii_H, 95.0, 89.17, 0.837; GCF_000369045.1, s__Acinetobacter pittii, 95.0, 89.07, 0.822; GCF_013009345.1, s__Acinetobacter geminorum, 95.0, 88.81, 0.801; GCF_001605885.1, s__Acinetobacter lactucae, 95.0, 88.62, 0.814; GCF_0133447…	98.05	11	N/A	N/A
502578-21-r-R9-Dorado-HAC-new	d__Bacteria;p__Pseudomonadota;c__Gammaproteobacteria;o__Pseudomonadales;f__Moraxellaceae;g__Acinetobacter;s__Acinetobacter baumannii	GCF_009759685.1	95	d__Bacteria;p__Pseudomonadota;c__Gammaproteobacteria;o__Pseudomonadales;f__Moraxellaceae;g__Acinetobacter;s__Acinetobacter baumannii	97.84	0.874	GCF_009759685.1	95	d__Bacteria;p__Pseudomonadota;c__Gammaproteobacteria;o__Pseudomonadales;f__Moraxellaceae;g__Acinetobacter;s__Acinetobacter baumannii	97.84	0.874	d__Bacteria;p__Pseudomonadota;c__Gammaproteobacteria;o__Pseudomonadales;f__Moraxellaceae;g__Acinetobacter;s__	taxonomic classification defined by topology and ANI	topological placement and ANI have congruent species assignments	GCF_000368085.1, s__Acinetobacter nosocomialis, 95.0, 92.07, 0.839; GCF_000368065.1, s__Acinetobacter seifertii, 95.0, 90.36, 0.755; GCF_002928115.1, s__Acinetobacter pittii_H, 95.0, 89.19, 0.82; GCF_000369045.1, s__Acinetobacter pittii, 95.0, 89.09, 0.814; GCF_013009345.1, s__Acinetobacter geminorum, 95.0, 88.75, 0.801; GCF_000399685.1, s__Acinetobacter pittii_E, 95.0, 88.57, 0.827; GCF_00160588…	97.8	11	N/A	N/A
502578-21-r-R9-Dorado-SUP-flye	d__Bacteria;p__Pseudomonadota;c__Gammaproteobacteria;o__Pseudomonadales;f__Moraxellaceae;g__Acinetobacter;s__Acinetobacter baumannii	GCF_009759685.1	95	d__Bacteria;p__Pseudomonadota;c__Gammaproteobacteria;o__Pseudomonadales;f__Moraxellaceae;g__Acinetobacter;s__Acinetobacter baumannii	97.84	0.874	GCF_009759685.1	95	d__Bacteria;p__Pseudomonadota;c__Gammaproteobacteria;o__Pseudomonadales;f__Moraxellaceae;g__Acinetobacter;s__Acinetobacter baumannii	97.84	0.874	d__Bacteria;p__Pseudomonadota;c__Gammaproteobacteria;o__Pseudomonadales;f__Moraxellaceae;g__Acinetobacter;s__	taxonomic classification defined by topology and ANI	topological placement and ANI have congruent species assignments	GCF_000368085.1, s__Acinetobacter nosocomialis, 95.0, 92.08, 0.836; GCF_000368065.1, s__Acinetobacter seifertii, 95.0, 90.34, 0.753; GCF_002928115.1, s__Acinetobacter pittii_H, 95.0, 89.16, 0.82; GCF_000369045.1, s__Acinetobacter pittii, 95.0, 89.07, 0.816; GCF_013009345.1, s__Acinetobacter geminorum, 95.0, 88.79, 0.803; GCF_001605885.1, s__Acinetobacter lactucae, 95.0, 88.59, 0.799; GCF_00039968…	98.57	11	N/A	N/A
502578-21-r-R9-Dorado-SUP-new	d__Bacteria;p__Pseudomonadota;c__Gammaproteobacteria;o__Pseudomonadales;f__Moraxellaceae;g__Acinetobacter;s__Acinetobacter baumannii	GCF_009759685.1	95	d__Bacteria;p__Pseudomonadota;c__Gammaproteobacteria;o__Pseudomonadales;f__Moraxellaceae;g__Acinetobacter;s__Acinetobacter baumannii	97.84	0.875	GCF_009759685.1	95	d__Bacteria;p__Pseudomonadota;c__Gammaproteobacteria;o__Pseudomonadales;f__Moraxellaceae;g__Acinetobacter;s__Acinetobacter baumannii	97.84	0.875	d__Bacteria;p__Pseudomonadota;c__Gammaproteobacteria;o__Pseudomonadales;f__Moraxellaceae;g__Acinetobacter;s__	taxonomic classification defined by topology and ANI	topological placement and ANI have congruent species assignments	GCF_000368085.1, s__Acinetobacter nosocomialis, 95.0, 92.09, 0.836; GCF_000368065.1, s__Acinetobacter seifertii, 95.0, 90.35, 0.751; GCF_002928115.1, s__Acinetobacter pittii_H, 95.0, 89.2, 0.818; GCF_000369045.1, s__Acinetobacter pittii, 95.0, 89.09, 0.81; GCF_013009345.1, s__Acinetobacter geminorum, 95.0, 88.79, 0.804; GCF_000399685.1, s__Acinetobacter pittii_E, 95.0, 88.57, 0.829; GCF_001605885…	98.83	11	N/A	N/A
502578-21-r-R9-Guppy-FAST-flye	d__Bacteria;p__Pseudomonadota;c__Gammaproteobacteria;o__Pseudomonadales;f__Moraxellaceae;g__Acinetobacter;s__Acinetobacter baumannii	GCF_009759685.1	95	d__Bacteria;p__Pseudomonadota;c__Gammaproteobacteria;o__Pseudomonadales;f__Moraxellaceae;g__Acinetobacter;s__Acinetobacter baumannii	97.87	0.865	GCF_009759685.1	95	d__Bacteria;p__Pseudomonadota;c__Gammaproteobacteria;o__Pseudomonadales;f__Moraxellaceae;g__Acinetobacter;s__Acinetobacter baumannii	97.87	0.865	d__Bacteria;p__Pseudomonadota;c__Gammaproteobacteria;o__Pseudomonadales;f__Moraxellaceae;g__Acinetobacter;s__	taxonomic classification defined by topology and ANI	topological placement and ANI have congruent species assignments	GCF_000368085.1, s__Acinetobacter nosocomialis, 95.0, 92.07, 0.849; GCF_000368065.1, s__Acinetobacter seifertii, 95.0, 90.39, 0.738; GCF_002928115.1, s__Acinetobacter pittii_H, 95.0, 89.17, 0.82; GCF_000369045.1, s__Acinetobacter pittii, 95.0, 89.16, 0.811; GCF_013009345.1, s__Acinetobacter geminorum, 95.0, 88.8, 0.81; GCF_001605885.1, s__Acinetobacter lactucae, 95.0, 88.61, 0.805; GCF_000399685.…	92.14	11	N/A	N/A
502578-21-r-R9-Guppy-FAST-new	d__Bacteria;p__Pseudomonadota;c__Gammaproteobacteria;o__Pseudomonadales;f__Moraxellaceae;g__Acinetobacter;s__Acinetobacter baumannii	GCF_009759685.1	95	d__Bacteria;p__Pseudomonadota;c__Gammaproteobacteria;o__Pseudomonadales;f__Moraxellaceae;g__Acinetobacter;s__Acinetobacter baumannii	97.87	0.866	GCF_009759685.1	95	d__Bacteria;p__Pseudomonadota;c__Gammaproteobacteria;o__Pseudomonadales;f__Moraxellaceae;g__Acinetobacter;s__Acinetobacter baumannii	97.87	0.866	d__Bacteria;p__Pseudomonadota;c__Gammaproteobacteria;o__Pseudomonadales;f__Moraxellaceae;g__Acinetobacter;s__	taxonomic classification defined by topology and ANI	topological placement and ANI have congruent species assignments	GCF_000368085.1, s__Acinetobacter nosocomialis, 95.0, 92.1, 0.853; GCF_000368065.1, s__Acinetobacter seifertii, 95.0, 90.47, 0.745; GCF_002928115.1, s__Acinetobacter pittii_H, 95.0, 89.14, 0.832; GCF_000369045.1, s__Acinetobacter pittii, 95.0, 89.09, 0.816; GCF_013009345.1, s__Acinetobacter geminorum, 95.0, 88.87, 0.814; GCF_001605885.1, s__Acinetobacter lactucae, 95.0, 88.61, 0.817; GCF_01334476…	97.91	11	N/A	N/A
502578-21-r-R9-Guppy-HAC-new	d__Bacteria;p__Pseudomonadota;c__Gammaproteobacteria;o__Pseudomonadales;f__Moraxellaceae;g__Acinetobacter;s__Acinetobacter baumannii	GCF_009759685.1	95	d__Bacteria;p__Pseudomonadota;c__Gammaproteobacteria;o__Pseudomonadales;f__Moraxellaceae;g__Acinetobacter;s__Acinetobacter baumannii	97.88	0.865	GCF_009759685.1	95	d__Bacteria;p__Pseudomonadota;c__Gammaproteobacteria;o__Pseudomonadales;f__Moraxellaceae;g__Acinetobacter;s__Acinetobacter baumannii	97.88	0.865	d__Bacteria;p__Pseudomonadota;c__Gammaproteobacteria;o__Pseudomonadales;f__Moraxellaceae;g__Acinetobacter;s__	taxonomic classification defined by topology and ANI	topological placement and ANI have congruent species assignments	GCF_000368085.1, s__Acinetobacter nosocomialis, 95.0, 92.08, 0.846; GCF_000368065.1, s__Acinetobacter seifertii, 95.0, 90.41, 0.741; GCF_002928115.1, s__Acinetobacter pittii_H, 95.0, 89.15, 0.828; GCF_000369045.1, s__Acinetobacter pittii, 95.0, 89.05, 0.811; GCF_013009345.1, s__Acinetobacter geminorum, 95.0, 88.82, 0.814; GCF_001605885.1, s__Acinetobacter lactucae, 95.0, 88.57, 0.817; GCF_0003996…	96.68	11	N/A	N/A
502578-21-r-R9-Guppy-SUP-flye	d__Bacteria;p__Pseudomonadota;c__Gammaproteobacteria;o__Pseudomonadales;f__Moraxellaceae;g__Acinetobacter;s__Acinetobacter baumannii	GCF_009759685.1	95	d__Bacteria;p__Pseudomonadota;c__Gammaproteobacteria;o__Pseudomonadales;f__Moraxellaceae;g__Acinetobacter;s__Acinetobacter baumannii	97.88	0.871	GCF_009759685.1	95	d__Bacteria;p__Pseudomonadota;c__Gammaproteobacteria;o__Pseudomonadales;f__Moraxellaceae;g__Acinetobacter;s__Acinetobacter baumannii	97.88	0.871	d__Bacteria;p__Pseudomonadota;c__Gammaproteobacteria;o__Pseudomonadales;f__Moraxellaceae;g__Acinetobacter;s__	taxonomic classification defined by topology and ANI	topological placement and ANI have congruent species assignments	GCF_000368085.1, s__Acinetobacter nosocomialis, 95.0, 92.04, 0.856; GCF_000368065.1, s__Acinetobacter seifertii, 95.0, 90.39, 0.742; GCF_002928115.1, s__Acinetobacter pittii_H, 95.0, 89.22, 0.82; GCF_000369045.1, s__Acinetobacter pittii, 95.0, 89.11, 0.81; GCF_013009345.1, s__Acinetobacter geminorum, 95.0, 88.81, 0.8; GCF_000399685.1, s__Acinetobacter pittii_E, 95.0, 88.61, 0.818; GCF_001605885.1…	98.57	11	N/A	N/A
502578-21-r-R9-Guppy-SUP-new	d__Bacteria;p__Pseudomonadota;c__Gammaproteobacteria;o__Pseudomonadales;f__Moraxellaceae;g__Acinetobacter;s__Acinetobacter baumannii	GCF_009759685.1	95	d__Bacteria;p__Pseudomonadota;c__Gammaproteobacteria;o__Pseudomonadales;f__Moraxellaceae;g__Acinetobacter;s__Acinetobacter baumannii	97.86	0.862	GCF_009759685.1	95	d__Bacteria;p__Pseudomonadota;c__Gammaproteobacteria;o__Pseudomonadales;f__Moraxellaceae;g__Acinetobacter;s__Acinetobacter baumannii	97.86	0.862	d__Bacteria;p__Pseudomonadota;c__Gammaproteobacteria;o__Pseudomonadales;f__Moraxellaceae;g__Acinetobacter;s__	taxonomic classification defined by topology and ANI	topological placement and ANI have congruent species assignments	GCF_000368085.1, s__Acinetobacter nosocomialis, 95.0, 92.11, 0.852; GCF_000368065.1, s__Acinetobacter seifertii, 95.0, 90.42, 0.742; GCF_002928115.1, s__Acinetobacter pittii_H, 95.0, 89.15, 0.825; GCF_000369045.1, s__Acinetobacter pittii, 95.0, 89.11, 0.811; GCF_013009345.1, s__Acinetobacter geminorum, 95.0, 88.83, 0.815; GCF_001605885.1, s__Acinetobacter lactucae, 95.0, 88.6, 0.813; GCF_00039968…	95.65	11	N/A	N/A
502578-21-r-srp-R10-Dorado-FAST-new	d__Bacteria;p__Pseudomonadota;c__Gammaproteobacteria;o__Pseudomonadales;f__Moraxellaceae;g__Acinetobacter;s__Acinetobacter baumannii	GCF_009759685.1	95	d__Bacteria;p__Pseudomonadota;c__Gammaproteobacteria;o__Pseudomonadales;f__Moraxellaceae;g__Acinetobacter;s__Acinetobacter baumannii	97.88	0.879	GCF_009759685.1	95	d__Bacteria;p__Pseudomonadota;c__Gammaproteobacteria;o__Pseudomonadales;f__Moraxellaceae;g__Acinetobacter;s__Acinetobacter baumannii	97.88	0.879	d__Bacteria;p__Pseudomonadota;c__Gammaproteobacteria;o__Pseudomonadales;f__Moraxellaceae;g__Acinetobacter;s__	taxonomic classification defined by topology and ANI	topological placement and ANI have congruent species assignments	GCF_000368085.1, s__Acinetobacter nosocomialis, 95.0, 92.06, 0.863; GCF_000368065.1, s__Acinetobacter seifertii, 95.0, 90.4, 0.762; GCF_002928115.1, s__Acinetobacter pittii_H, 95.0, 89.11, 0.844; GCF_000369045.1, s__Acinetobacter pittii, 95.0, 89.11, 0.816; GCF_013009345.1, s__Acinetobacter geminorum, 95.0, 88.82, 0.813; GCF_001605885.1, s__Acinetobacter lactucae, 95.0, 88.57, 0.809; GCF_00039968…	98.83	11	N/A	N/A
502578-21-r-srp-R10-Dorado-HAC-new	d__Bacteria;p__Pseudomonadota;c__Gammaproteobacteria;o__Pseudomonadales;f__Moraxellaceae;g__Acinetobacter;s__Acinetobacter baumannii	GCF_009759685.1	95	d__Bacteria;p__Pseudomonadota;c__Gammaproteobacteria;o__Pseudomonadales;f__Moraxellaceae;g__Acinetobacter;s__Acinetobacter baumannii	97.85	0.873	GCF_009759685.1	95	d__Bacteria;p__Pseudomonadota;c__Gammaproteobacteria;o__Pseudomonadales;f__Moraxellaceae;g__Acinetobacter;s__Acinetobacter baumannii	97.85	0.873	d__Bacteria;p__Pseudomonadota;c__Gammaproteobacteria;o__Pseudomonadales;f__Moraxellaceae;g__Acinetobacter;s__	taxonomic classification defined by topology and ANI	topological placement and ANI have congruent species assignments	GCF_000368085.1, s__Acinetobacter nosocomialis, 95.0, 92.11, 0.849; GCF_000368065.1, s__Acinetobacter seifertii, 95.0, 90.35, 0.756; GCF_002928115.1, s__Acinetobacter pittii_H, 95.0, 89.19, 0.822; GCF_000369045.1, s__Acinetobacter pittii, 95.0, 89.18, 0.823; GCF_013009345.1, s__Acinetobacter geminorum, 95.0, 88.8, 0.806; GCF_001605885.1, s__Acinetobacter lactucae, 95.0, 88.66, 0.807; GCF_01334476…	98.83	11	N/A	N/A
502578-21-r-srp-R10-Dorado-SUP-new	d__Bacteria;p__Pseudomonadota;c__Gammaproteobacteria;o__Pseudomonadales;f__Moraxellaceae;g__Acinetobacter;s__Acinetobacter baumannii	GCF_009759685.1	95	d__Bacteria;p__Pseudomonadota;c__Gammaproteobacteria;o__Pseudomonadales;f__Moraxellaceae;g__Acinetobacter;s__Acinetobacter baumannii	97.85	0.874	GCF_009759685.1	95	d__Bacteria;p__Pseudomonadota;c__Gammaproteobacteria;o__Pseudomonadales;f__Moraxellaceae;g__Acinetobacter;s__Acinetobacter baumannii	97.85	0.874	d__Bacteria;p__Pseudomonadota;c__Gammaproteobacteria;o__Pseudomonadales;f__Moraxellaceae;g__Acinetobacter;s__	taxonomic classification defined by topology and ANI	topological placement and ANI have congruent species assignments	GCF_000368085.1, s__Acinetobacter nosocomialis, 95.0, 92.1, 0.849; GCF_000368065.1, s__Acinetobacter seifertii, 95.0, 90.36, 0.755; GCF_000369045.1, s__Acinetobacter pittii, 95.0, 89.18, 0.823; GCF_002928115.1, s__Acinetobacter pittii_H, 95.0, 89.15, 0.825; GCF_013009345.1, s__Acinetobacter geminorum, 95.0, 88.77, 0.805; GCF_001605885.1, s__Acinetobacter lactucae, 95.0, 88.66, 0.803; GCF_01334476…	98.83	11	N/A	N/A
502578-21-r-srp-R10-Guppy-FAST-new	d__Bacteria;p__Pseudomonadota;c__Gammaproteobacteria;o__Pseudomonadales;f__Moraxellaceae;g__Acinetobacter;s__Acinetobacter baumannii	GCF_009759685.1	95	d__Bacteria;p__Pseudomonadota;c__Gammaproteobacteria;o__Pseudomonadales;f__Moraxellaceae;g__Acinetobacter;s__Acinetobacter baumannii	97.86	0.873	GCF_009759685.1	95	d__Bacteria;p__Pseudomonadota;c__Gammaproteobacteria;o__Pseudomonadales;f__Moraxellaceae;g__Acinetobacter;s__Acinetobacter baumannii	97.86	0.873	d__Bacteria;p__Pseudomonadota;c__Gammaproteobacteria;o__Pseudomonadales;f__Moraxellaceae;g__Acinetobacter;s__	taxonomic classification defined by topology and ANI	topological placement and ANI have congruent species assignments	GCF_000368085.1, s__Acinetobacter nosocomialis, 95.0, 92.1, 0.843; GCF_000368065.1, s__Acinetobacter seifertii, 95.0, 90.39, 0.763; GCF_002928115.1, s__Acinetobacter pittii_H, 95.0, 89.2, 0.833; GCF_000369045.1, s__Acinetobacter pittii, 95.0, 89.16, 0.819; GCF_013009345.1, s__Acinetobacter geminorum, 95.0, 88.81, 0.799; GCF_013344765.1, s__Acinetobacter lactucae_A, 95.0, 88.58, 0.851; GCF_0003996…	98.83	11	N/A	N/A
502578-21-r-srp-R10-Guppy-HAC-new	d__Bacteria;p__Pseudomonadota;c__Gammaproteobacteria;o__Pseudomonadales;f__Moraxellaceae;g__Acinetobacter;s__Acinetobacter baumannii	GCF_009759685.1	95	d__Bacteria;p__Pseudomonadota;c__Gammaproteobacteria;o__Pseudomonadales;f__Moraxellaceae;g__Acinetobacter;s__Acinetobacter baumannii	97.85	0.871	GCF_009759685.1	95	d__Bacteria;p__Pseudomonadota;c__Gammaproteobacteria;o__Pseudomonadales;f__Moraxellaceae;g__Acinetobacter;s__Acinetobacter baumannii	97.85	0.871	d__Bacteria;p__Pseudomonadota;c__Gammaproteobacteria;o__Pseudomonadales;f__Moraxellaceae;g__Acinetobacter;s__	taxonomic classification defined by topology and ANI	topological placement and ANI have congruent species assignments	GCF_000368085.1, s__Acinetobacter nosocomialis, 95.0, 92.07, 0.849; GCF_000368065.1, s__Acinetobacter seifertii, 95.0, 90.42, 0.761; GCF_002928115.1, s__Acinetobacter pittii_H, 95.0, 89.2, 0.821; GCF_000369045.1, s__Acinetobacter pittii, 95.0, 89.1, 0.823; GCF_013009345.1, s__Acinetobacter geminorum, 95.0, 88.74, 0.804; GCF_013344765.1, s__Acinetobacter lactucae_A, 95.0, 88.59, 0.848; GCF_0016058…	98.83	11	N/A	N/A
502578-21-r-srp-R10-Guppy-SUP-new	d__Bacteria;p__Pseudomonadota;c__Gammaproteobacteria;o__Pseudomonadales;f__Moraxellaceae;g__Acinetobacter;s__Acinetobacter baumannii	GCF_009759685.1	95	d__Bacteria;p__Pseudomonadota;c__Gammaproteobacteria;o__Pseudomonadales;f__Moraxellaceae;g__Acinetobacter;s__Acinetobacter baumannii	97.82	0.873	GCF_009759685.1	95	d__Bacteria;p__Pseudomonadota;c__Gammaproteobacteria;o__Pseudomonadales;f__Moraxellaceae;g__Acinetobacter;s__Acinetobacter baumannii	97.82	0.873	d__Bacteria;p__Pseudomonadota;c__Gammaproteobacteria;o__Pseudomonadales;f__Moraxellaceae;g__Acinetobacter;s__	taxonomic classification defined by topology and ANI	topological placement and ANI have congruent species assignments	GCF_000368085.1, s__Acinetobacter nosocomialis, 95.0, 92.03, 0.858; GCF_000368065.1, s__Acinetobacter seifertii, 95.0, 90.4, 0.756; GCF_002928115.1, s__Acinetobacter pittii_H, 95.0, 89.19, 0.834; GCF_000369045.1, s__Acinetobacter pittii, 95.0, 89.06, 0.805; GCF_013009345.1, s__Acinetobacter geminorum, 95.0, 88.78, 0.798; GCF_001605885.1, s__Acinetobacter lactucae, 95.0, 88.64, 0.803; GCF_00039968…	98.83	11	N/A	N/A
502578-21-r-srp-R10-Rerio-SUP-new	d__Bacteria;p__Pseudomonadota;c__Gammaproteobacteria;o__Pseudomonadales;f__Moraxellaceae;g__Acinetobacter;s__Acinetobacter baumannii	GCF_009759685.1	95	d__Bacteria;p__Pseudomonadota;c__Gammaproteobacteria;o__Pseudomonadales;f__Moraxellaceae;g__Acinetobacter;s__Acinetobacter baumannii	97.85	0.876	GCF_009759685.1	95	d__Bacteria;p__Pseudomonadota;c__Gammaproteobacteria;o__Pseudomonadales;f__Moraxellaceae;g__Acinetobacter;s__Acinetobacter baumannii	97.85	0.876	d__Bacteria;p__Pseudomonadota;c__Gammaproteobacteria;o__Pseudomonadales;f__Moraxellaceae;g__Acinetobacter;s__	taxonomic classification defined by topology and ANI	topological placement and ANI have congruent species assignments	GCF_000368085.1, s__Acinetobacter nosocomialis, 95.0, 92.13, 0.845; GCF_000368065.1, s__Acinetobacter seifertii, 95.0, 90.38, 0.747; GCF_002928115.1, s__Acinetobacter pittii_H, 95.0, 89.16, 0.824; GCF_000369045.1, s__Acinetobacter pittii, 95.0, 89.1, 0.821; GCF_013009345.1, s__Acinetobacter geminorum, 95.0, 88.8, 0.804; GCF_001605885.1, s__Acinetobacter lactucae, 95.0, 88.64, 0.809; GCF_013344765…	98.83	11	N/A	N/A
502578-21-r-srp-R9-Dorado-FAST-new	d__Bacteria;p__Pseudomonadota;c__Gammaproteobacteria;o__Pseudomonadales;f__Moraxellaceae;g__Acinetobacter;s__Acinetobacter baumannii	GCF_009759685.1	95	d__Bacteria;p__Pseudomonadota;c__Gammaproteobacteria;o__Pseudomonadales;f__Moraxellaceae;g__Acinetobacter;s__Acinetobacter baumannii	97.8	0.874	GCF_009759685.1	95	d__Bacteria;p__Pseudomonadota;c__Gammaproteobacteria;o__Pseudomonadales;f__Moraxellaceae;g__Acinetobacter;s__Acinetobacter baumannii	97.8	0.874	d__Bacteria;p__Pseudomonadota;c__Gammaproteobacteria;o__Pseudomonadales;f__Moraxellaceae;g__Acinetobacter;s__	taxonomic classification defined by topology and ANI	topological placement and ANI have congruent species assignments	GCF_000368085.1, s__Acinetobacter nosocomialis, 95.0, 92.05, 0.851; GCF_000368065.1, s__Acinetobacter seifertii, 95.0, 90.43, 0.745; GCF_002928115.1, s__Acinetobacter pittii_H, 95.0, 89.26, 0.835; GCF_000369045.1, s__Acinetobacter pittii, 95.0, 89.07, 0.81; GCF_013009345.1, s__Acinetobacter geminorum, 95.0, 88.85, 0.809; GCF_013344765.1, s__Acinetobacter lactucae_A, 95.0, 88.63, 0.855; GCF_001605…	98.83	11	N/A	N/A
502578-21-r-srp-R9-Dorado-HAC-new	d__Bacteria;p__Pseudomonadota;c__Gammaproteobacteria;o__Pseudomonadales;f__Moraxellaceae;g__Acinetobacter;s__Acinetobacter baumannii	GCF_009759685.1	95	d__Bacteria;p__Pseudomonadota;c__Gammaproteobacteria;o__Pseudomonadales;f__Moraxellaceae;g__Acinetobacter;s__Acinetobacter baumannii	97.86	0.874	GCF_009759685.1	95	d__Bacteria;p__Pseudomonadota;c__Gammaproteobacteria;o__Pseudomonadales;f__Moraxellaceae;g__Acinetobacter;s__Acinetobacter baumannii	97.86	0.874	d__Bacteria;p__Pseudomonadota;c__Gammaproteobacteria;o__Pseudomonadales;f__Moraxellaceae;g__Acinetobacter;s__	taxonomic classification defined by topology and ANI	topological placement and ANI have congruent species assignments	GCF_000368085.1, s__Acinetobacter nosocomialis, 95.0, 92.07, 0.835; GCF_000368065.1, s__Acinetobacter seifertii, 95.0, 90.35, 0.755; GCF_002928115.1, s__Acinetobacter pittii_H, 95.0, 89.18, 0.823; GCF_000369045.1, s__Acinetobacter pittii, 95.0, 89.13, 0.812; GCF_013009345.1, s__Acinetobacter geminorum, 95.0, 88.78, 0.799; GCF_000399685.1, s__Acinetobacter pittii_E, 95.0, 88.57, 0.829; GCF_0016058…	98.83	11	N/A	N/A
502578-21-r-srp-R9-Dorado-SUP-new	d__Bacteria;p__Pseudomonadota;c__Gammaproteobacteria;o__Pseudomonadales;f__Moraxellaceae;g__Acinetobacter;s__Acinetobacter baumannii	GCF_009759685.1	95	d__Bacteria;p__Pseudomonadota;c__Gammaproteobacteria;o__Pseudomonadales;f__Moraxellaceae;g__Acinetobacter;s__Acinetobacter baumannii	97.86	0.873	GCF_009759685.1	95	d__Bacteria;p__Pseudomonadota;c__Gammaproteobacteria;o__Pseudomonadales;f__Moraxellaceae;g__Acinetobacter;s__Acinetobacter baumannii	97.86	0.873	d__Bacteria;p__Pseudomonadota;c__Gammaproteobacteria;o__Pseudomonadales;f__Moraxellaceae;g__Acinetobacter;s__	taxonomic classification defined by topology and ANI	topological placement and ANI have congruent species assignments	GCF_000368085.1, s__Acinetobacter nosocomialis, 95.0, 92.07, 0.835; GCF_000368065.1, s__Acinetobacter seifertii, 95.0, 90.35, 0.755; GCF_002928115.1, s__Acinetobacter pittii_H, 95.0, 89.2, 0.822; GCF_000369045.1, s__Acinetobacter pittii, 95.0, 89.13, 0.811; GCF_013009345.1, s__Acinetobacter geminorum, 95.0, 88.78, 0.8; GCF_000399685.1, s__Acinetobacter pittii_E, 95.0, 88.58, 0.829; GCF_001605885.…	98.83	11	N/A	N/A
502578-21-r-srp-R9-Guppy-FAST-new	d__Bacteria;p__Pseudomonadota;c__Gammaproteobacteria;o__Pseudomonadales;f__Moraxellaceae;g__Acinetobacter;s__Acinetobacter baumannii	GCF_009759685.1	95	d__Bacteria;p__Pseudomonadota;c__Gammaproteobacteria;o__Pseudomonadales;f__Moraxellaceae;g__Acinetobacter;s__Acinetobacter baumannii	97.9	0.868	GCF_009759685.1	95	d__Bacteria;p__Pseudomonadota;c__Gammaproteobacteria;o__Pseudomonadales;f__Moraxellaceae;g__Acinetobacter;s__Acinetobacter baumannii	97.9	0.868	d__Bacteria;p__Pseudomonadota;c__Gammaproteobacteria;o__Pseudomonadales;f__Moraxellaceae;g__Acinetobacter;s__	taxonomic classification defined by topology and ANI	topological placement and ANI have congruent species assignments	GCF_000368085.1, s__Acinetobacter nosocomialis, 95.0, 92.11, 0.849; GCF_000368065.1, s__Acinetobacter seifertii, 95.0, 90.47, 0.743; GCF_002928115.1, s__Acinetobacter pittii_H, 95.0, 89.16, 0.831; GCF_000369045.1, s__Acinetobacter pittii, 95.0, 89.12, 0.814; GCF_013009345.1, s__Acinetobacter geminorum, 95.0, 88.9, 0.814; GCF_001605885.1, s__Acinetobacter lactucae, 95.0, 88.62, 0.816; GCF_01334476…	98.83	11	N/A	N/A
502578-21-r-srp-R9-Guppy-HAC-new	d__Bacteria;p__Pseudomonadota;c__Gammaproteobacteria;o__Pseudomonadales;f__Moraxellaceae;g__Acinetobacter;s__Acinetobacter baumannii	GCF_009759685.1	95	d__Bacteria;p__Pseudomonadota;c__Gammaproteobacteria;o__Pseudomonadales;f__Moraxellaceae;g__Acinetobacter;s__Acinetobacter baumannii	97.91	0.866	GCF_009759685.1	95	d__Bacteria;p__Pseudomonadota;c__Gammaproteobacteria;o__Pseudomonadales;f__Moraxellaceae;g__Acinetobacter;s__Acinetobacter baumannii	97.91	0.866	d__Bacteria;p__Pseudomonadota;c__Gammaproteobacteria;o__Pseudomonadales;f__Moraxellaceae;g__Acinetobacter;s__	taxonomic classification defined by topology and ANI	topological placement and ANI have congruent species assignments	GCF_000368085.1, s__Acinetobacter nosocomialis, 95.0, 92.13, 0.849; GCF_000368065.1, s__Acinetobacter seifertii, 95.0, 90.45, 0.743; GCF_002928115.1, s__Acinetobacter pittii_H, 95.0, 89.19, 0.83; GCF_000369045.1, s__Acinetobacter pittii, 95.0, 89.13, 0.812; GCF_013009345.1, s__Acinetobacter geminorum, 95.0, 88.92, 0.813; GCF_001605885.1, s__Acinetobacter lactucae, 95.0, 88.61, 0.817; GCF_01334476…	98.83	11	N/A	N/A
502578-21-r-srp-R9-Guppy-SUP-new	d__Bacteria;p__Pseudomonadota;c__Gammaproteobacteria;o__Pseudomonadales;f__Moraxellaceae;g__Acinetobacter;s__Acinetobacter baumannii	GCF_009759685.1	95	d__Bacteria;p__Pseudomonadota;c__Gammaproteobacteria;o__Pseudomonadales;f__Moraxellaceae;g__Acinetobacter;s__Acinetobacter baumannii	97.91	0.866	GCF_009759685.1	95	d__Bacteria;p__Pseudomonadota;c__Gammaproteobacteria;o__Pseudomonadales;f__Moraxellaceae;g__Acinetobacter;s__Acinetobacter baumannii	97.91	0.866	d__Bacteria;p__Pseudomonadota;c__Gammaproteobacteria;o__Pseudomonadales;f__Moraxellaceae;g__Acinetobacter;s__	taxonomic classification defined by topology and ANI	topological placement and ANI have congruent species assignments	GCF_000368085.1, s__Acinetobacter nosocomialis, 95.0, 92.12, 0.849; GCF_000368065.1, s__Acinetobacter seifertii, 95.0, 90.46, 0.743; GCF_002928115.1, s__Acinetobacter pittii_H, 95.0, 89.19, 0.829; GCF_000369045.1, s__Acinetobacter pittii, 95.0, 89.13, 0.811; GCF_013009345.1, s__Acinetobacter geminorum, 95.0, 88.92, 0.815; GCF_001605885.1, s__Acinetobacter lactucae, 95.0, 88.61, 0.817; GCF_0133447…	98.83	11	N/A	N/A
NARA308-r-illumina-new	d__Bacteria;p__Pseudomonadota;c__Gammaproteobacteria;o__Pseudomonadales;f__Moraxellaceae;g__Acinetobacter;s__Acinetobacter baumannii	GCF_009759685.1	95	d__Bacteria;p__Pseudomonadota;c__Gammaproteobacteria;o__Pseudomonadales;f__Moraxellaceae;g__Acinetobacter;s__Acinetobacter baumannii	97.88	0.853	GCF_009759685.1	95	d__Bacteria;p__Pseudomonadota;c__Gammaproteobacteria;o__Pseudomonadales;f__Moraxellaceae;g__Acinetobacter;s__Acinetobacter baumannii	97.88	0.853	d__Bacteria;p__Pseudomonadota;c__Gammaproteobacteria;o__Pseudomonadales;f__Moraxellaceae;g__Acinetobacter;s__	taxonomic classification defined by topology and ANI	topological placement and ANI have congruent species assignments	GCF_000368085.1, s__Acinetobacter nosocomialis, 95.0, 92.05, 0.838; GCF_000368065.1, s__Acinetobacter seifertii, 95.0, 90.42, 0.768; GCF_002928115.1, s__Acinetobacter pittii_H, 95.0, 89.15, 0.829; GCF_000369045.1, s__Acinetobacter pittii, 95.0, 89.01, 0.809; GCF_013009345.1, s__Acinetobacter geminorum, 95.0, 88.78, 0.786; GCF_001605885.1, s__Acinetobacter lactucae, 95.0, 88.7, 0.811; GCF_00039968…	98.83	11	N/A	N/A
NARA308-r-lrp-R10-Dorado-FAST-new	d__Bacteria;p__Pseudomonadota;c__Gammaproteobacteria;o__Pseudomonadales;f__Moraxellaceae;g__Acinetobacter;s__Acinetobacter baumannii	GCF_009759685.1	95	d__Bacteria;p__Pseudomonadota;c__Gammaproteobacteria;o__Pseudomonadales;f__Moraxellaceae;g__Acinetobacter;s__Acinetobacter baumannii	97.81	0.892	GCF_009759685.1	95	d__Bacteria;p__Pseudomonadota;c__Gammaproteobacteria;o__Pseudomonadales;f__Moraxellaceae;g__Acinetobacter;s__Acinetobacter baumannii	97.81	0.892	d__Bacteria;p__Pseudomonadota;c__Gammaproteobacteria;o__Pseudomonadales;f__Moraxellaceae;g__Acinetobacter;s__	taxonomic classification defined by topology and ANI	topological placement and ANI have congruent species assignments	GCF_000368085.1, s__Acinetobacter nosocomialis, 95.0, 92.06, 0.856; GCF_000368065.1, s__Acinetobacter seifertii, 95.0, 90.41, 0.747; GCF_002928115.1, s__Acinetobacter pittii_H, 95.0, 89.17, 0.836; GCF_000369045.1, s__Acinetobacter pittii, 95.0, 89.03, 0.829; GCF_013009345.1, s__Acinetobacter geminorum, 95.0, 88.74, 0.819; GCF_001605885.1, s__Acinetobacter lactucae, 95.0, 88.58, 0.815; GCF_0003996…	98.83	11	N/A	N/A
NARA308-r-lrp-R10-Dorado-HAC-new	d__Bacteria;p__Pseudomonadota;c__Gammaproteobacteria;o__Pseudomonadales;f__Moraxellaceae;g__Acinetobacter;s__Acinetobacter baumannii	GCF_009759685.1	95	d__Bacteria;p__Pseudomonadota;c__Gammaproteobacteria;o__Pseudomonadales;f__Moraxellaceae;g__Acinetobacter;s__Acinetobacter baumannii	97.78	0.893	GCF_009759685.1	95	d__Bacteria;p__Pseudomonadota;c__Gammaproteobacteria;o__Pseudomonadales;f__Moraxellaceae;g__Acinetobacter;s__Acinetobacter baumannii	97.78	0.893	d__Bacteria;p__Pseudomonadota;c__Gammaproteobacteria;o__Pseudomonadales;f__Moraxellaceae;g__Acinetobacter;s__	taxonomic classification defined by topology and ANI	topological placement and ANI have congruent species assignments	GCF_000368085.1, s__Acinetobacter nosocomialis, 95.0, 92.03, 0.857; GCF_000368065.1, s__Acinetobacter seifertii, 95.0, 90.37, 0.755; GCF_002928115.1, s__Acinetobacter pittii_H, 95.0, 89.19, 0.84; GCF_000369045.1, s__Acinetobacter pittii, 95.0, 89.03, 0.82; GCF_013009345.1, s__Acinetobacter geminorum, 95.0, 88.77, 0.821; GCF_013344765.1, s__Acinetobacter lactucae_A, 95.0, 88.55, 0.866; GCF_0016058…	98.83	11	N/A	N/A
NARA308-r-lrp-R10-Dorado-SUP-new	d__Bacteria;p__Pseudomonadota;c__Gammaproteobacteria;o__Pseudomonadales;f__Moraxellaceae;g__Acinetobacter;s__Acinetobacter baumannii	GCF_009759685.1	95	d__Bacteria;p__Pseudomonadota;c__Gammaproteobacteria;o__Pseudomonadales;f__Moraxellaceae;g__Acinetobacter;s__Acinetobacter baumannii	97.78	0.893	GCF_009759685.1	95	d__Bacteria;p__Pseudomonadota;c__Gammaproteobacteria;o__Pseudomonadales;f__Moraxellaceae;g__Acinetobacter;s__Acinetobacter baumannii	97.78	0.893	d__Bacteria;p__Pseudomonadota;c__Gammaproteobacteria;o__Pseudomonadales;f__Moraxellaceae;g__Acinetobacter;s__	taxonomic classification defined by topology and ANI	topological placement and ANI have congruent species assignments	GCF_000368085.1, s__Acinetobacter nosocomialis, 95.0, 92.03, 0.857; GCF_000368065.1, s__Acinetobacter seifertii, 95.0, 90.37, 0.755; GCF_002928115.1, s__Acinetobacter pittii_H, 95.0, 89.19, 0.84; GCF_000369045.1, s__Acinetobacter pittii, 95.0, 89.03, 0.82; GCF_013009345.1, s__Acinetobacter geminorum, 95.0, 88.77, 0.821; GCF_013344765.1, s__Acinetobacter lactucae_A, 95.0, 88.55, 0.866; GCF_0016058…	98.83	11	N/A	N/A
NARA308-r-lrp-R10-Guppy-FAST-new	d__Bacteria;p__Pseudomonadota;c__Gammaproteobacteria;o__Pseudomonadales;f__Moraxellaceae;g__Acinetobacter;s__Acinetobacter baumannii	GCF_009759685.1	95	d__Bacteria;p__Pseudomonadota;c__Gammaproteobacteria;o__Pseudomonadales;f__Moraxellaceae;g__Acinetobacter;s__Acinetobacter baumannii	97.81	0.891	GCF_009759685.1	95	d__Bacteria;p__Pseudomonadota;c__Gammaproteobacteria;o__Pseudomonadales;f__Moraxellaceae;g__Acinetobacter;s__Acinetobacter baumannii	97.81	0.891	d__Bacteria;p__Pseudomonadota;c__Gammaproteobacteria;o__Pseudomonadales;f__Moraxellaceae;g__Acinetobacter;s__	taxonomic classification defined by topology and ANI	topological placement and ANI have congruent species assignments	GCF_000368085.1, s__Acinetobacter nosocomialis, 95.0, 92.07, 0.857; GCF_000368065.1, s__Acinetobacter seifertii, 95.0, 90.42, 0.749; GCF_002928115.1, s__Acinetobacter pittii_H, 95.0, 89.17, 0.837; GCF_000369045.1, s__Acinetobacter pittii, 95.0, 89.02, 0.826; GCF_013009345.1, s__Acinetobacter geminorum, 95.0, 88.75, 0.816; GCF_001605885.1, s__Acinetobacter lactucae, 95.0, 88.59, 0.816; GCF_0003996…	98.83	11	N/A	N/A
NARA308-r-lrp-R10-Guppy-HAC-new	d__Bacteria;p__Pseudomonadota;c__Gammaproteobacteria;o__Pseudomonadales;f__Moraxellaceae;g__Acinetobacter;s__Acinetobacter baumannii	GCF_009759685.1	95	d__Bacteria;p__Pseudomonadota;c__Gammaproteobacteria;o__Pseudomonadales;f__Moraxellaceae;g__Acinetobacter;s__Acinetobacter baumannii	97.81	0.892	GCF_009759685.1	95	d__Bacteria;p__Pseudomonadota;c__Gammaproteobacteria;o__Pseudomonadales;f__Moraxellaceae;g__Acinetobacter;s__Acinetobacter baumannii	97.81	0.892	d__Bacteria;p__Pseudomonadota;c__Gammaproteobacteria;o__Pseudomonadales;f__Moraxellaceae;g__Acinetobacter;s__	taxonomic classification defined by topology and ANI	topological placement and ANI have congruent species assignments	GCF_000368085.1, s__Acinetobacter nosocomialis, 95.0, 92.06, 0.856; GCF_000368065.1, s__Acinetobacter seifertii, 95.0, 90.41, 0.747; GCF_002928115.1, s__Acinetobacter pittii_H, 95.0, 89.17, 0.836; GCF_000369045.1, s__Acinetobacter pittii, 95.0, 89.03, 0.829; GCF_013009345.1, s__Acinetobacter geminorum, 95.0, 88.74, 0.819; GCF_001605885.1, s__Acinetobacter lactucae, 95.0, 88.58, 0.815; GCF_0003996…	98.83	11	N/A	N/A
NARA308-r-lrp-R10-Guppy-SUP-new	d__Bacteria;p__Pseudomonadota;c__Gammaproteobacteria;o__Pseudomonadales;f__Moraxellaceae;g__Acinetobacter;s__Acinetobacter baumannii	GCF_009759685.1	95	d__Bacteria;p__Pseudomonadota;c__Gammaproteobacteria;o__Pseudomonadales;f__Moraxellaceae;g__Acinetobacter;s__Acinetobacter baumannii	97.78	0.893	GCF_009759685.1	95	d__Bacteria;p__Pseudomonadota;c__Gammaproteobacteria;o__Pseudomonadales;f__Moraxellaceae;g__Acinetobacter;s__Acinetobacter baumannii	97.78	0.893	d__Bacteria;p__Pseudomonadota;c__Gammaproteobacteria;o__Pseudomonadales;f__Moraxellaceae;g__Acinetobacter;s__	taxonomic classification defined by topology and ANI	topological placement and ANI have congruent species assignments	GCF_000368085.1, s__Acinetobacter nosocomialis, 95.0, 92.03, 0.857; GCF_000368065.1, s__Acinetobacter seifertii, 95.0, 90.37, 0.755; GCF_002928115.1, s__Acinetobacter pittii_H, 95.0, 89.19, 0.84; GCF_000369045.1, s__Acinetobacter pittii, 95.0, 89.03, 0.82; GCF_013009345.1, s__Acinetobacter geminorum, 95.0, 88.77, 0.821; GCF_013344765.1, s__Acinetobacter lactucae_A, 95.0, 88.55, 0.866; GCF_0016058…	98.83	11	N/A	N/A
NARA308-r-lrp-R10-Rerio-SUP-new	d__Bacteria;p__Pseudomonadota;c__Gammaproteobacteria;o__Pseudomonadales;f__Moraxellaceae;g__Acinetobacter;s__Acinetobacter baumannii	GCF_009759685.1	95	d__Bacteria;p__Pseudomonadota;c__Gammaproteobacteria;o__Pseudomonadales;f__Moraxellaceae;g__Acinetobacter;s__Acinetobacter baumannii	97.81	0.892	GCF_009759685.1	95	d__Bacteria;p__Pseudomonadota;c__Gammaproteobacteria;o__Pseudomonadales;f__Moraxellaceae;g__Acinetobacter;s__Acinetobacter baumannii	97.81	0.892	d__Bacteria;p__Pseudomonadota;c__Gammaproteobacteria;o__Pseudomonadales;f__Moraxellaceae;g__Acinetobacter;s__	taxonomic classification defined by topology and ANI	topological placement and ANI have congruent species assignments	GCF_000368085.1, s__Acinetobacter nosocomialis, 95.0, 92.06, 0.856; GCF_000368065.1, s__Acinetobacter seifertii, 95.0, 90.41, 0.747; GCF_002928115.1, s__Acinetobacter pittii_H, 95.0, 89.17, 0.836; GCF_000369045.1, s__Acinetobacter pittii, 95.0, 89.03, 0.829; GCF_013009345.1, s__Acinetobacter geminorum, 95.0, 88.74, 0.819; GCF_001605885.1, s__Acinetobacter lactucae, 95.0, 88.58, 0.815; GCF_0003996…	98.83	11	N/A	N/A
NARA308-r-lrp-R9-Dorado-FAST-new	d__Bacteria;p__Pseudomonadota;c__Gammaproteobacteria;o__Pseudomonadales;f__Moraxellaceae;g__Acinetobacter;s__Acinetobacter baumannii	GCF_009759685.1	95	d__Bacteria;p__Pseudomonadota;c__Gammaproteobacteria;o__Pseudomonadales;f__Moraxellaceae;g__Acinetobacter;s__Acinetobacter baumannii	97.79	0.888	GCF_009759685.1	95	d__Bacteria;p__Pseudomonadota;c__Gammaproteobacteria;o__Pseudomonadales;f__Moraxellaceae;g__Acinetobacter;s__Acinetobacter baumannii	97.79	0.888	d__Bacteria;p__Pseudomonadota;c__Gammaproteobacteria;o__Pseudomonadales;f__Moraxellaceae;g__Acinetobacter;s__	taxonomic classification defined by topology and ANI	topological placement and ANI have congruent species assignments	GCF_000368085.1, s__Acinetobacter nosocomialis, 95.0, 92.07, 0.859; GCF_000368065.1, s__Acinetobacter seifertii, 95.0, 90.37, 0.758; GCF_002928115.1, s__Acinetobacter pittii_H, 95.0, 89.25, 0.838; GCF_000369045.1, s__Acinetobacter pittii, 95.0, 89.14, 0.807; GCF_013009345.1, s__Acinetobacter geminorum, 95.0, 88.8, 0.814; GCF_013344765.1, s__Acinetobacter lactucae_A, 95.0, 88.56, 0.856; GCF_001605…	98.83	11	N/A	N/A
NARA308-r-lrp-R9-Dorado-HAC-new	d__Bacteria;p__Pseudomonadota;c__Gammaproteobacteria;o__Pseudomonadales;f__Moraxellaceae;g__Acinetobacter;s__Acinetobacter baumannii	GCF_009759685.1	95	d__Bacteria;p__Pseudomonadota;c__Gammaproteobacteria;o__Pseudomonadales;f__Moraxellaceae;g__Acinetobacter;s__Acinetobacter baumannii	97.79	0.888	GCF_009759685.1	95	d__Bacteria;p__Pseudomonadota;c__Gammaproteobacteria;o__Pseudomonadales;f__Moraxellaceae;g__Acinetobacter;s__Acinetobacter baumannii	97.79	0.888	d__Bacteria;p__Pseudomonadota;c__Gammaproteobacteria;o__Pseudomonadales;f__Moraxellaceae;g__Acinetobacter;s__	taxonomic classification defined by topology and ANI	topological placement and ANI have congruent species assignments	GCF_000368085.1, s__Acinetobacter nosocomialis, 95.0, 92.07, 0.859; GCF_000368065.1, s__Acinetobacter seifertii, 95.0, 90.37, 0.758; GCF_002928115.1, s__Acinetobacter pittii_H, 95.0, 89.25, 0.838; GCF_000369045.1, s__Acinetobacter pittii, 95.0, 89.14, 0.807; GCF_013009345.1, s__Acinetobacter geminorum, 95.0, 88.8, 0.814; GCF_013344765.1, s__Acinetobacter lactucae_A, 95.0, 88.56, 0.856; GCF_001605…	98.83	11	N/A	N/A
NARA308-r-lrp-R9-Dorado-SUP-new	d__Bacteria;p__Pseudomonadota;c__Gammaproteobacteria;o__Pseudomonadales;f__Moraxellaceae;g__Acinetobacter;s__Acinetobacter baumannii	GCF_009759685.1	95	d__Bacteria;p__Pseudomonadota;c__Gammaproteobacteria;o__Pseudomonadales;f__Moraxellaceae;g__Acinetobacter;s__Acinetobacter baumannii	97.8	0.889	GCF_009759685.1	95	d__Bacteria;p__Pseudomonadota;c__Gammaproteobacteria;o__Pseudomonadales;f__Moraxellaceae;g__Acinetobacter;s__Acinetobacter baumannii	97.8	0.889	d__Bacteria;p__Pseudomonadota;c__Gammaproteobacteria;o__Pseudomonadales;f__Moraxellaceae;g__Acinetobacter;s__	taxonomic classification defined by topology and ANI	topological placement and ANI have congruent species assignments	GCF_000368085.1, s__Acinetobacter nosocomialis, 95.0, 92.07, 0.859; GCF_000368065.1, s__Acinetobacter seifertii, 95.0, 90.37, 0.758; GCF_002928115.1, s__Acinetobacter pittii_H, 95.0, 89.25, 0.838; GCF_000369045.1, s__Acinetobacter pittii, 95.0, 89.15, 0.808; GCF_013009345.1, s__Acinetobacter geminorum, 95.0, 88.8, 0.814; GCF_013344765.1, s__Acinetobacter lactucae_A, 95.0, 88.56, 0.856; GCF_001605…	98.83	11	N/A	N/A
NARA308-r-lrp-R9-Guppy-FAST-new	d__Bacteria;p__Pseudomonadota;c__Gammaproteobacteria;o__Pseudomonadales;f__Moraxellaceae;g__Acinetobacter;s__Acinetobacter baumannii	GCF_009759685.1	95	d__Bacteria;p__Pseudomonadota;c__Gammaproteobacteria;o__Pseudomonadales;f__Moraxellaceae;g__Acinetobacter;s__Acinetobacter baumannii	97.79	0.886	GCF_009759685.1	95	d__Bacteria;p__Pseudomonadota;c__Gammaproteobacteria;o__Pseudomonadales;f__Moraxellaceae;g__Acinetobacter;s__Acinetobacter baumannii	97.79	0.886	d__Bacteria;p__Pseudomonadota;c__Gammaproteobacteria;o__Pseudomonadales;f__Moraxellaceae;g__Acinetobacter;s__	taxonomic classification defined by topology and ANI	topological placement and ANI have congruent species assignments	GCF_000368085.1, s__Acinetobacter nosocomialis, 95.0, 92.05, 0.862; GCF_000368065.1, s__Acinetobacter seifertii, 95.0, 90.37, 0.758; GCF_002928115.1, s__Acinetobacter pittii_H, 95.0, 89.19, 0.838; GCF_000369045.1, s__Acinetobacter pittii, 95.0, 89.12, 0.814; GCF_013009345.1, s__Acinetobacter geminorum, 95.0, 88.77, 0.813; GCF_013344765.1, s__Acinetobacter lactucae_A, 95.0, 88.57, 0.861; GCF_00160…	98.83	11	N/A	N/A
NARA308-r-lrp-R9-Guppy-HAC-new	d__Bacteria;p__Pseudomonadota;c__Gammaproteobacteria;o__Pseudomonadales;f__Moraxellaceae;g__Acinetobacter;s__Acinetobacter baumannii	GCF_009759685.1	95	d__Bacteria;p__Pseudomonadota;c__Gammaproteobacteria;o__Pseudomonadales;f__Moraxellaceae;g__Acinetobacter;s__Acinetobacter baumannii	97.79	0.888	GCF_009759685.1	95	d__Bacteria;p__Pseudomonadota;c__Gammaproteobacteria;o__Pseudomonadales;f__Moraxellaceae;g__Acinetobacter;s__Acinetobacter baumannii	97.79	0.888	d__Bacteria;p__Pseudomonadota;c__Gammaproteobacteria;o__Pseudomonadales;f__Moraxellaceae;g__Acinetobacter;s__	taxonomic classification defined by topology and ANI	topological placement and ANI have congruent species assignments	GCF_000368085.1, s__Acinetobacter nosocomialis, 95.0, 92.07, 0.859; GCF_000368065.1, s__Acinetobacter seifertii, 95.0, 90.37, 0.758; GCF_002928115.1, s__Acinetobacter pittii_H, 95.0, 89.25, 0.838; GCF_000369045.1, s__Acinetobacter pittii, 95.0, 89.14, 0.807; GCF_013009345.1, s__Acinetobacter geminorum, 95.0, 88.8, 0.814; GCF_013344765.1, s__Acinetobacter lactucae_A, 95.0, 88.56, 0.856; GCF_001605…	98.83	11	N/A	N/A
NARA308-r-lrp-R9-Guppy-SUP-new	d__Bacteria;p__Pseudomonadota;c__Gammaproteobacteria;o__Pseudomonadales;f__Moraxellaceae;g__Acinetobacter;s__Acinetobacter baumannii	GCF_009759685.1	95	d__Bacteria;p__Pseudomonadota;c__Gammaproteobacteria;o__Pseudomonadales;f__Moraxellaceae;g__Acinetobacter;s__Acinetobacter baumannii	97.79	0.888	GCF_009759685.1	95	d__Bacteria;p__Pseudomonadota;c__Gammaproteobacteria;o__Pseudomonadales;f__Moraxellaceae;g__Acinetobacter;s__Acinetobacter baumannii	97.79	0.888	d__Bacteria;p__Pseudomonadota;c__Gammaproteobacteria;o__Pseudomonadales;f__Moraxellaceae;g__Acinetobacter;s__	taxonomic classification defined by topology and ANI	topological placement and ANI have congruent species assignments	GCF_000368085.1, s__Acinetobacter nosocomialis, 95.0, 92.07, 0.859; GCF_000368065.1, s__Acinetobacter seifertii, 95.0, 90.37, 0.759; GCF_002928115.1, s__Acinetobacter pittii_H, 95.0, 89.25, 0.838; GCF_000369045.1, s__Acinetobacter pittii, 95.0, 89.14, 0.807; GCF_013009345.1, s__Acinetobacter geminorum, 95.0, 88.8, 0.814; GCF_013344765.1, s__Acinetobacter lactucae_A, 95.0, 88.56, 0.856; GCF_001605…	98.83	11	N/A	N/A
NARA308-r-R10-Dorado-FAST-flye	d__Bacteria;p__Pseudomonadota;c__Gammaproteobacteria;o__Pseudomonadales;f__Moraxellaceae;g__Acinetobacter;s__Acinetobacter baumannii	GCF_009759685.1	95	d__Bacteria;p__Pseudomonadota;c__Gammaproteobacteria;o__Pseudomonadales;f__Moraxellaceae;g__Acinetobacter;s__Acinetobacter baumannii	97.77	0.891	GCF_009759685.1	95	d__Bacteria;p__Pseudomonadota;c__Gammaproteobacteria;o__Pseudomonadales;f__Moraxellaceae;g__Acinetobacter;s__Acinetobacter baumannii	97.77	0.891	d__Bacteria;p__Pseudomonadota;c__Gammaproteobacteria;o__Pseudomonadales;f__Moraxellaceae;g__Acinetobacter;s__	taxonomic classification defined by topology and ANI	topological placement and ANI have congruent species assignments	GCF_000368085.1, s__Acinetobacter nosocomialis, 95.0, 92.01, 0.861; GCF_000368065.1, s__Acinetobacter seifertii, 95.0, 90.32, 0.748; GCF_002928115.1, s__Acinetobacter pittii_H, 95.0, 89.13, 0.84; GCF_000369045.1, s__Acinetobacter pittii, 95.0, 88.98, 0.819; GCF_013009345.1, s__Acinetobacter geminorum, 95.0, 88.71, 0.819; GCF_000399685.1, s__Acinetobacter pittii_E, 95.0, 88.55, 0.829; GCF_00160588…	92.06	11	N/A	N/A
NARA308-r-R10-Dorado-FAST-Medaka-2.0	d__Bacteria;p__Pseudomonadota;c__Gammaproteobacteria;o__Pseudomonadales;f__Moraxellaceae;g__Acinetobacter;s__Acinetobacter baumannii	GCF_009759685.1	95	d__Bacteria;p__Pseudomonadota;c__Gammaproteobacteria;o__Pseudomonadales;f__Moraxellaceae;g__Acinetobacter;s__Acinetobacter baumannii	97.77	0.891	GCF_009759685.1	95	d__Bacteria;p__Pseudomonadota;c__Gammaproteobacteria;o__Pseudomonadales;f__Moraxellaceae;g__Acinetobacter;s__Acinetobacter baumannii	97.77	0.891	d__Bacteria;p__Pseudomonadota;c__Gammaproteobacteria;o__Pseudomonadales;f__Moraxellaceae;g__Acinetobacter;s__	taxonomic classification defined by topology and ANI	topological placement and ANI have congruent species assignments	GCF_000368085.1, s__Acinetobacter nosocomialis, 95.0, 92.01, 0.861; GCF_000368065.1, s__Acinetobacter seifertii, 95.0, 90.32, 0.748; GCF_002928115.1, s__Acinetobacter pittii_H, 95.0, 89.13, 0.84; GCF_000369045.1, s__Acinetobacter pittii, 95.0, 88.98, 0.819; GCF_013009345.1, s__Acinetobacter geminorum, 95.0, 88.71, 0.819; GCF_000399685.1, s__Acinetobacter pittii_E, 95.0, 88.55, 0.829; GCF_00160588…	92.06	11	N/A	N/A
NARA308-r-R10-Dorado-FAST-new	d__Bacteria;p__Pseudomonadota;c__Gammaproteobacteria;o__Pseudomonadales;f__Moraxellaceae;g__Acinetobacter;s__Acinetobacter baumannii	GCF_009759685.1	95	d__Bacteria;p__Pseudomonadota;c__Gammaproteobacteria;o__Pseudomonadales;f__Moraxellaceae;g__Acinetobacter;s__Acinetobacter baumannii	97.8	0.892	GCF_009759685.1	95	d__Bacteria;p__Pseudomonadota;c__Gammaproteobacteria;o__Pseudomonadales;f__Moraxellaceae;g__Acinetobacter;s__Acinetobacter baumannii	97.8	0.892	d__Bacteria;p__Pseudomonadota;c__Gammaproteobacteria;o__Pseudomonadales;f__Moraxellaceae;g__Acinetobacter;s__	taxonomic classification defined by topology and ANI	topological placement and ANI have congruent species assignments	GCF_000368085.1, s__Acinetobacter nosocomialis, 95.0, 91.99, 0.863; GCF_000368065.1, s__Acinetobacter seifertii, 95.0, 90.38, 0.746; GCF_002928115.1, s__Acinetobacter pittii_H, 95.0, 89.17, 0.845; GCF_000369045.1, s__Acinetobacter pittii, 95.0, 89.02, 0.819; GCF_013009345.1, s__Acinetobacter geminorum, 95.0, 88.74, 0.813; GCF_000399685.1, s__Acinetobacter pittii_E, 95.0, 88.56, 0.826; GCF_0016058…	97.52	11	N/A	N/A
NARA308-r-R10-Dorado-HAC-flye	d__Bacteria;p__Pseudomonadota;c__Gammaproteobacteria;o__Pseudomonadales;f__Moraxellaceae;g__Acinetobacter;s__Acinetobacter baumannii	GCF_009759685.1	95	d__Bacteria;p__Pseudomonadota;c__Gammaproteobacteria;o__Pseudomonadales;f__Moraxellaceae;g__Acinetobacter;s__Acinetobacter baumannii	97.85	0.884	GCF_009759685.1	95	d__Bacteria;p__Pseudomonadota;c__Gammaproteobacteria;o__Pseudomonadales;f__Moraxellaceae;g__Acinetobacter;s__Acinetobacter baumannii	97.85	0.884	d__Bacteria;p__Pseudomonadota;c__Gammaproteobacteria;o__Pseudomonadales;f__Moraxellaceae;g__Acinetobacter;s__	taxonomic classification defined by topology and ANI	topological placement and ANI have congruent species assignments	GCF_000368085.1, s__Acinetobacter nosocomialis, 95.0, 92.06, 0.855; GCF_000368065.1, s__Acinetobacter seifertii, 95.0, 90.42, 0.739; GCF_002928115.1, s__Acinetobacter pittii_H, 95.0, 89.22, 0.825; GCF_000369045.1, s__Acinetobacter pittii, 95.0, 89.14, 0.809; GCF_013009345.1, s__Acinetobacter geminorum, 95.0, 88.76, 0.8; GCF_001605885.1, s__Acinetobacter lactucae, 95.0, 88.57, 0.826; GCF_013344765…	98.83	11	N/A	N/A
NARA308-r-R10-Dorado-HAC-Medaka-2.0	d__Bacteria;p__Pseudomonadota;c__Gammaproteobacteria;o__Pseudomonadales;f__Moraxellaceae;g__Acinetobacter;s__Acinetobacter baumannii	GCF_009759685.1	95	d__Bacteria;p__Pseudomonadota;c__Gammaproteobacteria;o__Pseudomonadales;f__Moraxellaceae;g__Acinetobacter;s__Acinetobacter baumannii	97.86	0.882	GCF_009759685.1	95	d__Bacteria;p__Pseudomonadota;c__Gammaproteobacteria;o__Pseudomonadales;f__Moraxellaceae;g__Acinetobacter;s__Acinetobacter baumannii	97.86	0.882	d__Bacteria;p__Pseudomonadota;c__Gammaproteobacteria;o__Pseudomonadales;f__Moraxellaceae;g__Acinetobacter;s__	taxonomic classification defined by topology and ANI	topological placement and ANI have congruent species assignments	GCF_000368085.1, s__Acinetobacter nosocomialis, 95.0, 92.04, 0.856; GCF_000368065.1, s__Acinetobacter seifertii, 95.0, 90.43, 0.738; GCF_002928115.1, s__Acinetobacter pittii_H, 95.0, 89.22, 0.82; GCF_000369045.1, s__Acinetobacter pittii, 95.0, 89.14, 0.807; GCF_013009345.1, s__Acinetobacter geminorum, 95.0, 88.81, 0.799; GCF_013344765.1, s__Acinetobacter lactucae_A, 95.0, 88.56, 0.856; GCF_001605…	98.83	11	N/A	N/A
NARA308-r-R10-Dorado-HAC-new	d__Bacteria;p__Pseudomonadota;c__Gammaproteobacteria;o__Pseudomonadales;f__Moraxellaceae;g__Acinetobacter;s__Acinetobacter baumannii	GCF_009759685.1	95	d__Bacteria;p__Pseudomonadota;c__Gammaproteobacteria;o__Pseudomonadales;f__Moraxellaceae;g__Acinetobacter;s__Acinetobacter baumannii	97.86	0.882	GCF_009759685.1	95	d__Bacteria;p__Pseudomonadota;c__Gammaproteobacteria;o__Pseudomonadales;f__Moraxellaceae;g__Acinetobacter;s__Acinetobacter baumannii	97.86	0.882	d__Bacteria;p__Pseudomonadota;c__Gammaproteobacteria;o__Pseudomonadales;f__Moraxellaceae;g__Acinetobacter;s__	taxonomic classification defined by topology and ANI	topological placement and ANI have congruent species assignments	GCF_000368085.1, s__Acinetobacter nosocomialis, 95.0, 92.05, 0.857; GCF_000368065.1, s__Acinetobacter seifertii, 95.0, 90.43, 0.738; GCF_002928115.1, s__Acinetobacter pittii_H, 95.0, 89.22, 0.82; GCF_000369045.1, s__Acinetobacter pittii, 95.0, 89.15, 0.806; GCF_013009345.1, s__Acinetobacter geminorum, 95.0, 88.81, 0.8; GCF_013344765.1, s__Acinetobacter lactucae_A, 95.0, 88.55, 0.856; GCF_00160588…	98.83	11	N/A	N/A
NARA308-r-R10-Dorado-SUP-flye	d__Bacteria;p__Pseudomonadota;c__Gammaproteobacteria;o__Pseudomonadales;f__Moraxellaceae;g__Acinetobacter;s__Acinetobacter baumannii	GCF_009759685.1	95	d__Bacteria;p__Pseudomonadota;c__Gammaproteobacteria;o__Pseudomonadales;f__Moraxellaceae;g__Acinetobacter;s__Acinetobacter baumannii	97.86	0.882	GCF_009759685.1	95	d__Bacteria;p__Pseudomonadota;c__Gammaproteobacteria;o__Pseudomonadales;f__Moraxellaceae;g__Acinetobacter;s__Acinetobacter baumannii	97.86	0.882	d__Bacteria;p__Pseudomonadota;c__Gammaproteobacteria;o__Pseudomonadales;f__Moraxellaceae;g__Acinetobacter;s__	taxonomic classification defined by topology and ANI	topological placement and ANI have congruent species assignments	GCF_000368085.1, s__Acinetobacter nosocomialis, 95.0, 92.04, 0.856; GCF_000368065.1, s__Acinetobacter seifertii, 95.0, 90.43, 0.738; GCF_002928115.1, s__Acinetobacter pittii_H, 95.0, 89.22, 0.82; GCF_000369045.1, s__Acinetobacter pittii, 95.0, 89.14, 0.807; GCF_013009345.1, s__Acinetobacter geminorum, 95.0, 88.81, 0.799; GCF_013344765.1, s__Acinetobacter lactucae_A, 95.0, 88.56, 0.855; GCF_001605…	98.83	11	N/A	N/A
NARA308-r-R10-Dorado-SUP-Medaka-2.0	d__Bacteria;p__Pseudomonadota;c__Gammaproteobacteria;o__Pseudomonadales;f__Moraxellaceae;g__Acinetobacter;s__Acinetobacter baumannii	GCF_009759685.1	95	d__Bacteria;p__Pseudomonadota;c__Gammaproteobacteria;o__Pseudomonadales;f__Moraxellaceae;g__Acinetobacter;s__Acinetobacter baumannii	97.86	0.882	GCF_009759685.1	95	d__Bacteria;p__Pseudomonadota;c__Gammaproteobacteria;o__Pseudomonadales;f__Moraxellaceae;g__Acinetobacter;s__Acinetobacter baumannii	97.86	0.882	d__Bacteria;p__Pseudomonadota;c__Gammaproteobacteria;o__Pseudomonadales;f__Moraxellaceae;g__Acinetobacter;s__	taxonomic classification defined by topology and ANI	topological placement and ANI have congruent species assignments	GCF_000368085.1, s__Acinetobacter nosocomialis, 95.0, 92.05, 0.857; GCF_000368065.1, s__Acinetobacter seifertii, 95.0, 90.43, 0.738; GCF_002928115.1, s__Acinetobacter pittii_H, 95.0, 89.22, 0.82; GCF_000369045.1, s__Acinetobacter pittii, 95.0, 89.15, 0.806; GCF_013009345.1, s__Acinetobacter geminorum, 95.0, 88.81, 0.799; GCF_013344765.1, s__Acinetobacter lactucae_A, 95.0, 88.55, 0.856; GCF_001605…	98.83	11	N/A	N/A
NARA308-r-R10-Dorado-SUP-new	d__Bacteria;p__Pseudomonadota;c__Gammaproteobacteria;o__Pseudomonadales;f__Moraxellaceae;g__Acinetobacter;s__Acinetobacter baumannii	GCF_009759685.1	95	d__Bacteria;p__Pseudomonadota;c__Gammaproteobacteria;o__Pseudomonadales;f__Moraxellaceae;g__Acinetobacter;s__Acinetobacter baumannii	97.86	0.882	GCF_009759685.1	95	d__Bacteria;p__Pseudomonadota;c__Gammaproteobacteria;o__Pseudomonadales;f__Moraxellaceae;g__Acinetobacter;s__Acinetobacter baumannii	97.86	0.882	d__Bacteria;p__Pseudomonadota;c__Gammaproteobacteria;o__Pseudomonadales;f__Moraxellaceae;g__Acinetobacter;s__	taxonomic classification defined by topology and ANI	topological placement and ANI have congruent species assignments	GCF_000368085.1, s__Acinetobacter nosocomialis, 95.0, 92.04, 0.856; GCF_000368065.1, s__Acinetobacter seifertii, 95.0, 90.43, 0.738; GCF_002928115.1, s__Acinetobacter pittii_H, 95.0, 89.22, 0.82; GCF_000369045.1, s__Acinetobacter pittii, 95.0, 89.15, 0.806; GCF_013009345.1, s__Acinetobacter geminorum, 95.0, 88.81, 0.799; GCF_013344765.1, s__Acinetobacter lactucae_A, 95.0, 88.55, 0.856; GCF_001605…	98.83	11	N/A	N/A
NARA308-r-R10-Guppy-FAST-flye	d__Bacteria;p__Pseudomonadota;c__Gammaproteobacteria;o__Pseudomonadales;f__Moraxellaceae;g__Acinetobacter;s__Acinetobacter baumannii	GCF_009759685.1	95	d__Bacteria;p__Pseudomonadota;c__Gammaproteobacteria;o__Pseudomonadales;f__Moraxellaceae;g__Acinetobacter;s__Acinetobacter baumannii	97.81	0.885	GCF_009759685.1	95	d__Bacteria;p__Pseudomonadota;c__Gammaproteobacteria;o__Pseudomonadales;f__Moraxellaceae;g__Acinetobacter;s__Acinetobacter baumannii	97.81	0.885	d__Bacteria;p__Pseudomonadota;c__Gammaproteobacteria;o__Pseudomonadales;f__Moraxellaceae;g__Acinetobacter;s__	taxonomic classification defined by topology and ANI	topological placement and ANI have congruent species assignments	GCF_000368085.1, s__Acinetobacter nosocomialis, 95.0, 92.0, 0.864; GCF_000368065.1, s__Acinetobacter seifertii, 95.0, 90.3, 0.751; GCF_002928115.1, s__Acinetobacter pittii_H, 95.0, 89.14, 0.838; GCF_000369045.1, s__Acinetobacter pittii, 95.0, 89.01, 0.829; GCF_013009345.1, s__Acinetobacter geminorum, 95.0, 88.77, 0.798; GCF_001605885.1, s__Acinetobacter lactucae, 95.0, 88.56, 0.82; GCF_000399685.…	92.57	11	N/A	N/A
NARA308-r-R10-Guppy-FAST-Medaka-2.0	d__Bacteria;p__Pseudomonadota;c__Gammaproteobacteria;o__Pseudomonadales;f__Moraxellaceae;g__Acinetobacter;s__Acinetobacter baumannii	GCF_009759685.1	95	d__Bacteria;p__Pseudomonadota;c__Gammaproteobacteria;o__Pseudomonadales;f__Moraxellaceae;g__Acinetobacter;s__Acinetobacter baumannii	97.85	0.886	GCF_009759685.1	95	d__Bacteria;p__Pseudomonadota;c__Gammaproteobacteria;o__Pseudomonadales;f__Moraxellaceae;g__Acinetobacter;s__Acinetobacter baumannii	97.85	0.886	d__Bacteria;p__Pseudomonadota;c__Gammaproteobacteria;o__Pseudomonadales;f__Moraxellaceae;g__Acinetobacter;s__	taxonomic classification defined by topology and ANI	topological placement and ANI have congruent species assignments	GCF_000368085.1, s__Acinetobacter nosocomialis, 95.0, 92.01, 0.869; GCF_000368065.1, s__Acinetobacter seifertii, 95.0, 90.34, 0.752; GCF_002928115.1, s__Acinetobacter pittii_H, 95.0, 89.16, 0.84; GCF_000369045.1, s__Acinetobacter pittii, 95.0, 89.01, 0.833; GCF_013009345.1, s__Acinetobacter geminorum, 95.0, 88.76, 0.8; GCF_001605885.1, s__Acinetobacter lactucae, 95.0, 88.58, 0.823; GCF_000399685.…	90.63	11	N/A	N/A
NARA308-r-R10-Guppy-FAST-new	d__Bacteria;p__Pseudomonadota;c__Gammaproteobacteria;o__Pseudomonadales;f__Moraxellaceae;g__Acinetobacter;s__Acinetobacter baumannii	GCF_009759685.1	95	d__Bacteria;p__Pseudomonadota;c__Gammaproteobacteria;o__Pseudomonadales;f__Moraxellaceae;g__Acinetobacter;s__Acinetobacter baumannii	97.82	0.884	GCF_009759685.1	95	d__Bacteria;p__Pseudomonadota;c__Gammaproteobacteria;o__Pseudomonadales;f__Moraxellaceae;g__Acinetobacter;s__Acinetobacter baumannii	97.82	0.884	d__Bacteria;p__Pseudomonadota;c__Gammaproteobacteria;o__Pseudomonadales;f__Moraxellaceae;g__Acinetobacter;s__	taxonomic classification defined by topology and ANI	topological placement and ANI have congruent species assignments	GCF_000368085.1, s__Acinetobacter nosocomialis, 95.0, 92.07, 0.867; GCF_000368065.1, s__Acinetobacter seifertii, 95.0, 90.39, 0.743; GCF_002928115.1, s__Acinetobacter pittii_H, 95.0, 89.22, 0.827; GCF_000369045.1, s__Acinetobacter pittii, 95.0, 89.06, 0.818; GCF_013009345.1, s__Acinetobacter geminorum, 95.0, 88.78, 0.81; GCF_001605885.1, s__Acinetobacter lactucae, 95.0, 88.59, 0.82; GCF_013344765…	95.79	11	N/A	N/A
NARA308-r-R10-Guppy-HAC-flye	d__Bacteria;p__Pseudomonadota;c__Gammaproteobacteria;o__Pseudomonadales;f__Moraxellaceae;g__Acinetobacter;s__Acinetobacter baumannii	GCF_009759685.1	95	d__Bacteria;p__Pseudomonadota;c__Gammaproteobacteria;o__Pseudomonadales;f__Moraxellaceae;g__Acinetobacter;s__Acinetobacter baumannii	97.82	0.884	GCF_009759685.1	95	d__Bacteria;p__Pseudomonadota;c__Gammaproteobacteria;o__Pseudomonadales;f__Moraxellaceae;g__Acinetobacter;s__Acinetobacter baumannii	97.82	0.884	d__Bacteria;p__Pseudomonadota;c__Gammaproteobacteria;o__Pseudomonadales;f__Moraxellaceae;g__Acinetobacter;s__	taxonomic classification defined by topology and ANI	topological placement and ANI have congruent species assignments	GCF_000368085.1, s__Acinetobacter nosocomialis, 95.0, 92.04, 0.855; GCF_000368065.1, s__Acinetobacter seifertii, 95.0, 90.4, 0.749; GCF_002928115.1, s__Acinetobacter pittii_H, 95.0, 89.22, 0.827; GCF_000369045.1, s__Acinetobacter pittii, 95.0, 89.09, 0.818; GCF_013009345.1, s__Acinetobacter geminorum, 95.0, 88.86, 0.802; GCF_001605885.1, s__Acinetobacter lactucae, 95.0, 88.58, 0.82; GCF_013344765…	98.83	11	N/A	N/A
NARA308-r-R10-Guppy-HAC-Medaka-2.0	d__Bacteria;p__Pseudomonadota;c__Gammaproteobacteria;o__Pseudomonadales;f__Moraxellaceae;g__Acinetobacter;s__Acinetobacter baumannii	GCF_009759685.1	95	d__Bacteria;p__Pseudomonadota;c__Gammaproteobacteria;o__Pseudomonadales;f__Moraxellaceae;g__Acinetobacter;s__Acinetobacter baumannii	97.82	0.884	GCF_009759685.1	95	d__Bacteria;p__Pseudomonadota;c__Gammaproteobacteria;o__Pseudomonadales;f__Moraxellaceae;g__Acinetobacter;s__Acinetobacter baumannii	97.82	0.884	d__Bacteria;p__Pseudomonadota;c__Gammaproteobacteria;o__Pseudomonadales;f__Moraxellaceae;g__Acinetobacter;s__	taxonomic classification defined by topology and ANI	topological placement and ANI have congruent species assignments	GCF_000368085.1, s__Acinetobacter nosocomialis, 95.0, 92.04, 0.856; GCF_000368065.1, s__Acinetobacter seifertii, 95.0, 90.39, 0.75; GCF_002928115.1, s__Acinetobacter pittii_H, 95.0, 89.22, 0.826; GCF_000369045.1, s__Acinetobacter pittii, 95.0, 89.09, 0.817; GCF_013009345.1, s__Acinetobacter geminorum, 95.0, 88.87, 0.802; GCF_001605885.1, s__Acinetobacter lactucae, 95.0, 88.58, 0.821; GCF_01334476…	98.83	11	N/A	N/A
NARA308-r-R10-Guppy-HAC-new	d__Bacteria;p__Pseudomonadota;c__Gammaproteobacteria;o__Pseudomonadales;f__Moraxellaceae;g__Acinetobacter;s__Acinetobacter baumannii	GCF_009759685.1	95	d__Bacteria;p__Pseudomonadota;c__Gammaproteobacteria;o__Pseudomonadales;f__Moraxellaceae;g__Acinetobacter;s__Acinetobacter baumannii	97.82	0.884	GCF_009759685.1	95	d__Bacteria;p__Pseudomonadota;c__Gammaproteobacteria;o__Pseudomonadales;f__Moraxellaceae;g__Acinetobacter;s__Acinetobacter baumannii	97.82	0.884	d__Bacteria;p__Pseudomonadota;c__Gammaproteobacteria;o__Pseudomonadales;f__Moraxellaceae;g__Acinetobacter;s__	taxonomic classification defined by topology and ANI	topological placement and ANI have congruent species assignments	GCF_000368085.1, s__Acinetobacter nosocomialis, 95.0, 92.04, 0.855; GCF_000368065.1, s__Acinetobacter seifertii, 95.0, 90.4, 0.75; GCF_002928115.1, s__Acinetobacter pittii_H, 95.0, 89.22, 0.826; GCF_000369045.1, s__Acinetobacter pittii, 95.0, 89.09, 0.816; GCF_013009345.1, s__Acinetobacter geminorum, 95.0, 88.87, 0.802; GCF_001605885.1, s__Acinetobacter lactucae, 95.0, 88.58, 0.821; GCF_013344765…	98.83	11	N/A	N/A
NARA308-r-R10-Guppy-SUP-flye	d__Bacteria;p__Pseudomonadota;c__Gammaproteobacteria;o__Pseudomonadales;f__Moraxellaceae;g__Acinetobacter;s__Acinetobacter baumannii	GCF_009759685.1	95	d__Bacteria;p__Pseudomonadota;c__Gammaproteobacteria;o__Pseudomonadales;f__Moraxellaceae;g__Acinetobacter;s__Acinetobacter baumannii	97.82	0.886	GCF_009759685.1	95	d__Bacteria;p__Pseudomonadota;c__Gammaproteobacteria;o__Pseudomonadales;f__Moraxellaceae;g__Acinetobacter;s__Acinetobacter baumannii	97.82	0.886	d__Bacteria;p__Pseudomonadota;c__Gammaproteobacteria;o__Pseudomonadales;f__Moraxellaceae;g__Acinetobacter;s__	taxonomic classification defined by topology and ANI	topological placement and ANI have congruent species assignments	GCF_000368085.1, s__Acinetobacter nosocomialis, 95.0, 92.04, 0.855; GCF_000368065.1, s__Acinetobacter seifertii, 95.0, 90.37, 0.753; GCF_002928115.1, s__Acinetobacter pittii_H, 95.0, 89.26, 0.825; GCF_000369045.1, s__Acinetobacter pittii, 95.0, 89.03, 0.823; GCF_013009345.1, s__Acinetobacter geminorum, 95.0, 88.88, 0.809; GCF_001605885.1, s__Acinetobacter lactucae, 95.0, 88.61, 0.819; GCF_0133447…	98.83	11	N/A	N/A
NARA308-r-R10-Guppy-SUP-Medaka-2.0	d__Bacteria;p__Pseudomonadota;c__Gammaproteobacteria;o__Pseudomonadales;f__Moraxellaceae;g__Acinetobacter;s__Acinetobacter baumannii	GCF_009759685.1	95	d__Bacteria;p__Pseudomonadota;c__Gammaproteobacteria;o__Pseudomonadales;f__Moraxellaceae;g__Acinetobacter;s__Acinetobacter baumannii	97.82	0.886	GCF_009759685.1	95	d__Bacteria;p__Pseudomonadota;c__Gammaproteobacteria;o__Pseudomonadales;f__Moraxellaceae;g__Acinetobacter;s__Acinetobacter baumannii	97.82	0.886	d__Bacteria;p__Pseudomonadota;c__Gammaproteobacteria;o__Pseudomonadales;f__Moraxellaceae;g__Acinetobacter;s__	taxonomic classification defined by topology and ANI	topological placement and ANI have congruent species assignments	GCF_000368085.1, s__Acinetobacter nosocomialis, 95.0, 92.05, 0.854; GCF_000368065.1, s__Acinetobacter seifertii, 95.0, 90.37, 0.753; GCF_002928115.1, s__Acinetobacter pittii_H, 95.0, 89.26, 0.825; GCF_000369045.1, s__Acinetobacter pittii, 95.0, 89.03, 0.824; GCF_013009345.1, s__Acinetobacter geminorum, 95.0, 88.87, 0.808; GCF_001605885.1, s__Acinetobacter lactucae, 95.0, 88.61, 0.819; GCF_0133447…	98.83	11	N/A	N/A
NARA308-r-R10-Guppy-SUP-new	d__Bacteria;p__Pseudomonadota;c__Gammaproteobacteria;o__Pseudomonadales;f__Moraxellaceae;g__Acinetobacter;s__Acinetobacter baumannii	GCF_009759685.1	95	d__Bacteria;p__Pseudomonadota;c__Gammaproteobacteria;o__Pseudomonadales;f__Moraxellaceae;g__Acinetobacter;s__Acinetobacter baumannii	97.82	0.886	GCF_009759685.1	95	d__Bacteria;p__Pseudomonadota;c__Gammaproteobacteria;o__Pseudomonadales;f__Moraxellaceae;g__Acinetobacter;s__Acinetobacter baumannii	97.82	0.886	d__Bacteria;p__Pseudomonadota;c__Gammaproteobacteria;o__Pseudomonadales;f__Moraxellaceae;g__Acinetobacter;s__	taxonomic classification defined by topology and ANI	topological placement and ANI have congruent species assignments	GCF_000368085.1, s__Acinetobacter nosocomialis, 95.0, 92.04, 0.855; GCF_000368065.1, s__Acinetobacter seifertii, 95.0, 90.38, 0.753; GCF_002928115.1, s__Acinetobacter pittii_H, 95.0, 89.26, 0.824; GCF_000369045.1, s__Acinetobacter pittii, 95.0, 89.03, 0.824; GCF_013009345.1, s__Acinetobacter geminorum, 95.0, 88.88, 0.809; GCF_001605885.1, s__Acinetobacter lactucae, 95.0, 88.61, 0.82; GCF_01334476…	98.83	11	N/A	N/A
NARA308-r-R10-Rerio-SUP-new	d__Bacteria;p__Pseudomonadota;c__Gammaproteobacteria;o__Pseudomonadales;f__Moraxellaceae;g__Acinetobacter;s__Acinetobacter baumannii	GCF_009759685.1	95	d__Bacteria;p__Pseudomonadota;c__Gammaproteobacteria;o__Pseudomonadales;f__Moraxellaceae;g__Acinetobacter;s__Acinetobacter baumannii	97.84	0.886	GCF_009759685.1	95	d__Bacteria;p__Pseudomonadota;c__Gammaproteobacteria;o__Pseudomonadales;f__Moraxellaceae;g__Acinetobacter;s__Acinetobacter baumannii	97.84	0.886	d__Bacteria;p__Pseudomonadota;c__Gammaproteobacteria;o__Pseudomonadales;f__Moraxellaceae;g__Acinetobacter;s__	taxonomic classification defined by topology and ANI	topological placement and ANI have congruent species assignments	GCF_000368085.1, s__Acinetobacter nosocomialis, 95.0, 92.08, 0.856; GCF_000368065.1, s__Acinetobacter seifertii, 95.0, 90.42, 0.741; GCF_002928115.1, s__Acinetobacter pittii_H, 95.0, 89.21, 0.823; GCF_000369045.1, s__Acinetobacter pittii, 95.0, 89.14, 0.81; GCF_013009345.1, s__Acinetobacter geminorum, 95.0, 88.75, 0.8; GCF_001605885.1, s__Acinetobacter lactucae, 95.0, 88.57, 0.826; GCF_013344765.…	98.83	11	N/A	N/A
NARA308-r-R9-Dorado-FAST-flye	d__Bacteria;p__Pseudomonadota;c__Gammaproteobacteria;o__Pseudomonadales;f__Moraxellaceae;g__Acinetobacter;s__Acinetobacter baumannii	GCF_009759685.1	95	d__Bacteria;p__Pseudomonadota;c__Gammaproteobacteria;o__Pseudomonadales;f__Moraxellaceae;g__Acinetobacter;s__Acinetobacter baumannii	97.8	0.886	GCF_009759685.1	95	d__Bacteria;p__Pseudomonadota;c__Gammaproteobacteria;o__Pseudomonadales;f__Moraxellaceae;g__Acinetobacter;s__Acinetobacter baumannii	97.8	0.886	d__Bacteria;p__Pseudomonadota;c__Gammaproteobacteria;o__Pseudomonadales;f__Moraxellaceae;g__Acinetobacter;s__	taxonomic classification defined by topology and ANI	topological placement and ANI have congruent species assignments	GCF_000368085.1, s__Acinetobacter nosocomialis, 95.0, 92.04, 0.861; GCF_000368065.1, s__Acinetobacter seifertii, 95.0, 90.34, 0.753; GCF_002928115.1, s__Acinetobacter pittii_H, 95.0, 89.11, 0.845; GCF_000369045.1, s__Acinetobacter pittii, 95.0, 89.09, 0.809; GCF_013009345.1, s__Acinetobacter geminorum, 95.0, 88.81, 0.795; GCF_001605885.1, s__Acinetobacter lactucae, 95.0, 88.59, 0.811; GCF_0133447…	89.83	11	N/A	N/A
NARA308-r-R9-Dorado-FAST-new	d__Bacteria;p__Pseudomonadota;c__Gammaproteobacteria;o__Pseudomonadales;f__Moraxellaceae;g__Acinetobacter;s__Acinetobacter baumannii	GCF_009759685.1	95	d__Bacteria;p__Pseudomonadota;c__Gammaproteobacteria;o__Pseudomonadales;f__Moraxellaceae;g__Acinetobacter;s__Acinetobacter baumannii	97.83	0.885	GCF_009759685.1	95	d__Bacteria;p__Pseudomonadota;c__Gammaproteobacteria;o__Pseudomonadales;f__Moraxellaceae;g__Acinetobacter;s__Acinetobacter baumannii	97.83	0.885	d__Bacteria;p__Pseudomonadota;c__Gammaproteobacteria;o__Pseudomonadales;f__Moraxellaceae;g__Acinetobacter;s__	taxonomic classification defined by topology and ANI	topological placement and ANI have congruent species assignments	GCF_000368085.1, s__Acinetobacter nosocomialis, 95.0, 92.09, 0.863; GCF_000368065.1, s__Acinetobacter seifertii, 95.0, 90.42, 0.748; GCF_002928115.1, s__Acinetobacter pittii_H, 95.0, 89.24, 0.831; GCF_000369045.1, s__Acinetobacter pittii, 95.0, 89.09, 0.819; GCF_013009345.1, s__Acinetobacter geminorum, 95.0, 88.88, 0.793; GCF_001605885.1, s__Acinetobacter lactucae, 95.0, 88.64, 0.809; GCF_0003996…	97.56	11	N/A	N/A
NARA308-r-R9-Dorado-HAC-flye	d__Bacteria;p__Pseudomonadota;c__Gammaproteobacteria;o__Pseudomonadales;f__Moraxellaceae;g__Acinetobacter;s__Acinetobacter baumannii	GCF_009759685.1	95	d__Bacteria;p__Pseudomonadota;c__Gammaproteobacteria;o__Pseudomonadales;f__Moraxellaceae;g__Acinetobacter;s__Acinetobacter baumannii	97.82	0.883	GCF_009759685.1	95	d__Bacteria;p__Pseudomonadota;c__Gammaproteobacteria;o__Pseudomonadales;f__Moraxellaceae;g__Acinetobacter;s__Acinetobacter baumannii	97.82	0.883	d__Bacteria;p__Pseudomonadota;c__Gammaproteobacteria;o__Pseudomonadales;f__Moraxellaceae;g__Acinetobacter;s__	taxonomic classification defined by topology and ANI	topological placement and ANI have congruent species assignments	GCF_000368085.1, s__Acinetobacter nosocomialis, 95.0, 92.1, 0.868; GCF_000368065.1, s__Acinetobacter seifertii, 95.0, 90.38, 0.752; GCF_002928115.1, s__Acinetobacter pittii_H, 95.0, 89.18, 0.839; GCF_000369045.1, s__Acinetobacter pittii, 95.0, 89.08, 0.824; GCF_013009345.1, s__Acinetobacter geminorum, 95.0, 88.86, 0.793; GCF_001605885.1, s__Acinetobacter lactucae, 95.0, 88.62, 0.813; GCF_00039968…	94.12	11	N/A	N/A
NARA308-r-R9-Dorado-HAC-new	d__Bacteria;p__Pseudomonadota;c__Gammaproteobacteria;o__Pseudomonadales;f__Moraxellaceae;g__Acinetobacter;s__Acinetobacter baumannii	GCF_009759685.1	95	d__Bacteria;p__Pseudomonadota;c__Gammaproteobacteria;o__Pseudomonadales;f__Moraxellaceae;g__Acinetobacter;s__Acinetobacter baumannii	97.81	0.886	GCF_009759685.1	95	d__Bacteria;p__Pseudomonadota;c__Gammaproteobacteria;o__Pseudomonadales;f__Moraxellaceae;g__Acinetobacter;s__Acinetobacter baumannii	97.81	0.886	d__Bacteria;p__Pseudomonadota;c__Gammaproteobacteria;o__Pseudomonadales;f__Moraxellaceae;g__Acinetobacter;s__	taxonomic classification defined by topology and ANI	topological placement and ANI have congruent species assignments	GCF_000368085.1, s__Acinetobacter nosocomialis, 95.0, 92.08, 0.856; GCF_000368065.1, s__Acinetobacter seifertii, 95.0, 90.41, 0.748; GCF_002928115.1, s__Acinetobacter pittii_H, 95.0, 89.23, 0.83; GCF_000369045.1, s__Acinetobacter pittii, 95.0, 89.1, 0.813; GCF_013009345.1, s__Acinetobacter geminorum, 95.0, 88.87, 0.784; GCF_001605885.1, s__Acinetobacter lactucae, 95.0, 88.64, 0.805; GCF_013344765…	97.5	11	N/A	N/A
NARA308-r-R9-Dorado-SUP-flye	d__Bacteria;p__Pseudomonadota;c__Gammaproteobacteria;o__Pseudomonadales;f__Moraxellaceae;g__Acinetobacter;s__Acinetobacter baumannii	GCF_009759685.1	95	d__Bacteria;p__Pseudomonadota;c__Gammaproteobacteria;o__Pseudomonadales;f__Moraxellaceae;g__Acinetobacter;s__Acinetobacter baumannii	97.83	0.883	GCF_009759685.1	95	d__Bacteria;p__Pseudomonadota;c__Gammaproteobacteria;o__Pseudomonadales;f__Moraxellaceae;g__Acinetobacter;s__Acinetobacter baumannii	97.83	0.883	d__Bacteria;p__Pseudomonadota;c__Gammaproteobacteria;o__Pseudomonadales;f__Moraxellaceae;g__Acinetobacter;s__	taxonomic classification defined by topology and ANI	topological placement and ANI have congruent species assignments	GCF_000368085.1, s__Acinetobacter nosocomialis, 95.0, 92.05, 0.863; GCF_000368065.1, s__Acinetobacter seifertii, 95.0, 90.39, 0.75; GCF_002928115.1, s__Acinetobacter pittii_H, 95.0, 89.21, 0.826; GCF_000369045.1, s__Acinetobacter pittii, 95.0, 89.1, 0.816; GCF_013009345.1, s__Acinetobacter geminorum, 95.0, 88.83, 0.799; GCF_001605885.1, s__Acinetobacter lactucae, 95.0, 88.57, 0.817; GCF_013344765…	97.22	11	N/A	N/A
NARA308-r-R9-Dorado-SUP-new	d__Bacteria;p__Pseudomonadota;c__Gammaproteobacteria;o__Pseudomonadales;f__Moraxellaceae;g__Acinetobacter;s__Acinetobacter baumannii	GCF_009759685.1	95	d__Bacteria;p__Pseudomonadota;c__Gammaproteobacteria;o__Pseudomonadales;f__Moraxellaceae;g__Acinetobacter;s__Acinetobacter baumannii	97.82	0.886	GCF_009759685.1	95	d__Bacteria;p__Pseudomonadota;c__Gammaproteobacteria;o__Pseudomonadales;f__Moraxellaceae;g__Acinetobacter;s__Acinetobacter baumannii	97.82	0.886	d__Bacteria;p__Pseudomonadota;c__Gammaproteobacteria;o__Pseudomonadales;f__Moraxellaceae;g__Acinetobacter;s__	taxonomic classification defined by topology and ANI	topological placement and ANI have congruent species assignments	GCF_000368085.1, s__Acinetobacter nosocomialis, 95.0, 92.05, 0.863; GCF_000368065.1, s__Acinetobacter seifertii, 95.0, 90.4, 0.751; GCF_002928115.1, s__Acinetobacter pittii_H, 95.0, 89.26, 0.84; GCF_000369045.1, s__Acinetobacter pittii, 95.0, 89.13, 0.819; GCF_013009345.1, s__Acinetobacter geminorum, 95.0, 88.87, 0.796; GCF_001605885.1, s__Acinetobacter lactucae, 95.0, 88.62, 0.809; GCF_000399685…	98.11	11	N/A	N/A
NARA308-r-R9-Guppy-FAST-flye	d__Bacteria;p__Pseudomonadota;c__Gammaproteobacteria;o__Pseudomonadales;f__Moraxellaceae;g__Acinetobacter;s__Acinetobacter baumannii	GCF_009759685.1	95	d__Bacteria;p__Pseudomonadota;c__Gammaproteobacteria;o__Pseudomonadales;f__Moraxellaceae;g__Acinetobacter;s__Acinetobacter baumannii	97.8	0.886	GCF_009759685.1	95	d__Bacteria;p__Pseudomonadota;c__Gammaproteobacteria;o__Pseudomonadales;f__Moraxellaceae;g__Acinetobacter;s__Acinetobacter baumannii	97.8	0.886	d__Bacteria;p__Pseudomonadota;c__Gammaproteobacteria;o__Pseudomonadales;f__Moraxellaceae;g__Acinetobacter;s__	taxonomic classification defined by topology and ANI	topological placement and ANI have congruent species assignments	GCF_000368085.1, s__Acinetobacter nosocomialis, 95.0, 92.05, 0.856; GCF_000368065.1, s__Acinetobacter seifertii, 95.0, 90.35, 0.755; GCF_002928115.1, s__Acinetobacter pittii_H, 95.0, 89.12, 0.832; GCF_000369045.1, s__Acinetobacter pittii, 95.0, 89.07, 0.817; GCF_013009345.1, s__Acinetobacter geminorum, 95.0, 88.87, 0.807; GCF_001605885.1, s__Acinetobacter lactucae, 95.0, 88.56, 0.815; GCF_0133447…	85.3	11	N/A	N/A
NARA308-r-R9-Guppy-FAST-new	d__Bacteria;p__Pseudomonadota;c__Gammaproteobacteria;o__Pseudomonadales;f__Moraxellaceae;g__Acinetobacter;s__Acinetobacter baumannii	GCF_009759685.1	95	d__Bacteria;p__Pseudomonadota;c__Gammaproteobacteria;o__Pseudomonadales;f__Moraxellaceae;g__Acinetobacter;s__Acinetobacter baumannii	97.86	0.879	GCF_009759685.1	95	d__Bacteria;p__Pseudomonadota;c__Gammaproteobacteria;o__Pseudomonadales;f__Moraxellaceae;g__Acinetobacter;s__Acinetobacter baumannii	97.86	0.879	d__Bacteria;p__Pseudomonadota;c__Gammaproteobacteria;o__Pseudomonadales;f__Moraxellaceae;g__Acinetobacter;s__	taxonomic classification defined by topology and ANI	topological placement and ANI have congruent species assignments	GCF_000368085.1, s__Acinetobacter nosocomialis, 95.0, 92.08, 0.859; GCF_000368065.1, s__Acinetobacter seifertii, 95.0, 90.4, 0.748; GCF_002928115.1, s__Acinetobacter pittii_H, 95.0, 89.22, 0.827; GCF_000369045.1, s__Acinetobacter pittii, 95.0, 89.14, 0.814; GCF_013009345.1, s__Acinetobacter geminorum, 95.0, 88.87, 0.794; GCF_001605885.1, s__Acinetobacter lactucae, 95.0, 88.57, 0.826; GCF_01334476…	98.49	11	N/A	N/A
NARA308-r-R9-Guppy-HAC-flye	d__Bacteria;p__Pseudomonadota;c__Gammaproteobacteria;o__Pseudomonadales;f__Moraxellaceae;g__Acinetobacter;s__Acinetobacter baumannii	GCF_009759685.1	95	d__Bacteria;p__Pseudomonadota;c__Gammaproteobacteria;o__Pseudomonadales;f__Moraxellaceae;g__Acinetobacter;s__Acinetobacter baumannii	97.81	0.881	GCF_009759685.1	95	d__Bacteria;p__Pseudomonadota;c__Gammaproteobacteria;o__Pseudomonadales;f__Moraxellaceae;g__Acinetobacter;s__Acinetobacter baumannii	97.81	0.881	d__Bacteria;p__Pseudomonadota;c__Gammaproteobacteria;o__Pseudomonadales;f__Moraxellaceae;g__Acinetobacter;s__	taxonomic classification defined by topology and ANI	topological placement and ANI have congruent species assignments	GCF_000368085.1, s__Acinetobacter nosocomialis, 95.0, 92.09, 0.86; GCF_000368065.1, s__Acinetobacter seifertii, 95.0, 90.42, 0.742; GCF_002928115.1, s__Acinetobacter pittii_H, 95.0, 89.23, 0.828; GCF_000369045.1, s__Acinetobacter pittii, 95.0, 89.09, 0.81; GCF_013009345.1, s__Acinetobacter geminorum, 95.0, 88.87, 0.789; GCF_001605885.1, s__Acinetobacter lactucae, 95.0, 88.59, 0.824; GCF_013344765…	96.39	11	N/A	N/A
NARA308-r-R9-Guppy-HAC-new	d__Bacteria;p__Pseudomonadota;c__Gammaproteobacteria;o__Pseudomonadales;f__Moraxellaceae;g__Acinetobacter;s__Acinetobacter baumannii	GCF_009759685.1	95	d__Bacteria;p__Pseudomonadota;c__Gammaproteobacteria;o__Pseudomonadales;f__Moraxellaceae;g__Acinetobacter;s__Acinetobacter baumannii	97.82	0.882	GCF_009759685.1	95	d__Bacteria;p__Pseudomonadota;c__Gammaproteobacteria;o__Pseudomonadales;f__Moraxellaceae;g__Acinetobacter;s__Acinetobacter baumannii	97.82	0.882	d__Bacteria;p__Pseudomonadota;c__Gammaproteobacteria;o__Pseudomonadales;f__Moraxellaceae;g__Acinetobacter;s__	taxonomic classification defined by topology and ANI	topological placement and ANI have congruent species assignments	GCF_000368085.1, s__Acinetobacter nosocomialis, 95.0, 92.08, 0.864; GCF_000368065.1, s__Acinetobacter seifertii, 95.0, 90.43, 0.745; GCF_002928115.1, s__Acinetobacter pittii_H, 95.0, 89.24, 0.831; GCF_000369045.1, s__Acinetobacter pittii, 95.0, 89.11, 0.817; GCF_013009345.1, s__Acinetobacter geminorum, 95.0, 88.85, 0.792; GCF_001605885.1, s__Acinetobacter lactucae, 95.0, 88.6, 0.816; GCF_01334476…	98.83	11	N/A	N/A
NARA308-r-R9-Guppy-SUP-flye	d__Bacteria;p__Pseudomonadota;c__Gammaproteobacteria;o__Pseudomonadales;f__Moraxellaceae;g__Acinetobacter;s__Acinetobacter baumannii	GCF_009759685.1	95	d__Bacteria;p__Pseudomonadota;c__Gammaproteobacteria;o__Pseudomonadales;f__Moraxellaceae;g__Acinetobacter;s__Acinetobacter baumannii	97.81	0.886	GCF_009759685.1	95	d__Bacteria;p__Pseudomonadota;c__Gammaproteobacteria;o__Pseudomonadales;f__Moraxellaceae;g__Acinetobacter;s__Acinetobacter baumannii	97.81	0.886	d__Bacteria;p__Pseudomonadota;c__Gammaproteobacteria;o__Pseudomonadales;f__Moraxellaceae;g__Acinetobacter;s__	taxonomic classification defined by topology and ANI	topological placement and ANI have congruent species assignments	GCF_000368085.1, s__Acinetobacter nosocomialis, 95.0, 92.07, 0.856; GCF_000368065.1, s__Acinetobacter seifertii, 95.0, 90.39, 0.748; GCF_002928115.1, s__Acinetobacter pittii_H, 95.0, 89.21, 0.834; GCF_000369045.1, s__Acinetobacter pittii, 95.0, 89.14, 0.812; GCF_013009345.1, s__Acinetobacter geminorum, 95.0, 88.86, 0.795; GCF_013344765.1, s__Acinetobacter lactucae_A, 95.0, 88.59, 0.862; GCF_00160…	98.57	11	N/A	N/A
NARA308-r-R9-Guppy-SUP-new	d__Bacteria;p__Pseudomonadota;c__Gammaproteobacteria;o__Pseudomonadales;f__Moraxellaceae;g__Acinetobacter;s__Acinetobacter baumannii	GCF_009759685.1	95	d__Bacteria;p__Pseudomonadota;c__Gammaproteobacteria;o__Pseudomonadales;f__Moraxellaceae;g__Acinetobacter;s__Acinetobacter baumannii	97.81	0.887	GCF_009759685.1	95	d__Bacteria;p__Pseudomonadota;c__Gammaproteobacteria;o__Pseudomonadales;f__Moraxellaceae;g__Acinetobacter;s__Acinetobacter baumannii	97.81	0.887	d__Bacteria;p__Pseudomonadota;c__Gammaproteobacteria;o__Pseudomonadales;f__Moraxellaceae;g__Acinetobacter;s__	taxonomic classification defined by topology and ANI	topological placement and ANI have congruent species assignments	GCF_000368085.1, s__Acinetobacter nosocomialis, 95.0, 92.08, 0.856; GCF_000368065.1, s__Acinetobacter seifertii, 95.0, 90.39, 0.749; GCF_002928115.1, s__Acinetobacter pittii_H, 95.0, 89.24, 0.833; GCF_000369045.1, s__Acinetobacter pittii, 95.0, 89.14, 0.815; GCF_013009345.1, s__Acinetobacter geminorum, 95.0, 88.86, 0.792; GCF_013344765.1, s__Acinetobacter lactucae_A, 95.0, 88.6, 0.863; GCF_001605…	98.83	11	N/A	N/A
NARA308-r-srp-R10-Dorado-FAST-new	d__Bacteria;p__Pseudomonadota;c__Gammaproteobacteria;o__Pseudomonadales;f__Moraxellaceae;g__Acinetobacter;s__Acinetobacter baumannii	GCF_009759685.1	95	d__Bacteria;p__Pseudomonadota;c__Gammaproteobacteria;o__Pseudomonadales;f__Moraxellaceae;g__Acinetobacter;s__Acinetobacter baumannii	97.81	0.89	GCF_009759685.1	95	d__Bacteria;p__Pseudomonadota;c__Gammaproteobacteria;o__Pseudomonadales;f__Moraxellaceae;g__Acinetobacter;s__Acinetobacter baumannii	97.81	0.89	d__Bacteria;p__Pseudomonadota;c__Gammaproteobacteria;o__Pseudomonadales;f__Moraxellaceae;g__Acinetobacter;s__	taxonomic classification defined by topology and ANI	topological placement and ANI have congruent species assignments	GCF_000368085.1, s__Acinetobacter nosocomialis, 95.0, 91.99, 0.861; GCF_000368065.1, s__Acinetobacter seifertii, 95.0, 90.37, 0.753; GCF_002928115.1, s__Acinetobacter pittii_H, 95.0, 89.19, 0.843; GCF_000369045.1, s__Acinetobacter pittii, 95.0, 89.02, 0.823; GCF_013009345.1, s__Acinetobacter geminorum, 95.0, 88.75, 0.81; GCF_001605885.1, s__Acinetobacter lactucae, 95.0, 88.61, 0.812; GCF_00039968…	98.83	11	N/A	N/A
NARA308-r-srp-R10-Dorado-HAC-new	d__Bacteria;p__Pseudomonadota;c__Gammaproteobacteria;o__Pseudomonadales;f__Moraxellaceae;g__Acinetobacter;s__Acinetobacter baumannii	GCF_009759685.1	95	d__Bacteria;p__Pseudomonadota;c__Gammaproteobacteria;o__Pseudomonadales;f__Moraxellaceae;g__Acinetobacter;s__Acinetobacter baumannii	97.86	0.882	GCF_009759685.1	95	d__Bacteria;p__Pseudomonadota;c__Gammaproteobacteria;o__Pseudomonadales;f__Moraxellaceae;g__Acinetobacter;s__Acinetobacter baumannii	97.86	0.882	d__Bacteria;p__Pseudomonadota;c__Gammaproteobacteria;o__Pseudomonadales;f__Moraxellaceae;g__Acinetobacter;s__	taxonomic classification defined by topology and ANI	topological placement and ANI have congruent species assignments	GCF_000368085.1, s__Acinetobacter nosocomialis, 95.0, 92.05, 0.857; GCF_000368065.1, s__Acinetobacter seifertii, 95.0, 90.43, 0.738; GCF_002928115.1, s__Acinetobacter pittii_H, 95.0, 89.22, 0.82; GCF_000369045.1, s__Acinetobacter pittii, 95.0, 89.15, 0.806; GCF_013009345.1, s__Acinetobacter geminorum, 95.0, 88.8, 0.8; GCF_013344765.1, s__Acinetobacter lactucae_A, 95.0, 88.55, 0.856; GCF_001605885…	98.83	11	N/A	N/A
NARA308-r-srp-R10-Dorado-SUP-new	d__Bacteria;p__Pseudomonadota;c__Gammaproteobacteria;o__Pseudomonadales;f__Moraxellaceae;g__Acinetobacter;s__Acinetobacter baumannii	GCF_009759685.1	95	d__Bacteria;p__Pseudomonadota;c__Gammaproteobacteria;o__Pseudomonadales;f__Moraxellaceae;g__Acinetobacter;s__Acinetobacter baumannii	97.86	0.882	GCF_009759685.1	95	d__Bacteria;p__Pseudomonadota;c__Gammaproteobacteria;o__Pseudomonadales;f__Moraxellaceae;g__Acinetobacter;s__Acinetobacter baumannii	97.86	0.882	d__Bacteria;p__Pseudomonadota;c__Gammaproteobacteria;o__Pseudomonadales;f__Moraxellaceae;g__Acinetobacter;s__	taxonomic classification defined by topology and ANI	topological placement and ANI have congruent species assignments	GCF_000368085.1, s__Acinetobacter nosocomialis, 95.0, 92.05, 0.857; GCF_000368065.1, s__Acinetobacter seifertii, 95.0, 90.43, 0.738; GCF_002928115.1, s__Acinetobacter pittii_H, 95.0, 89.22, 0.82; GCF_000369045.1, s__Acinetobacter pittii, 95.0, 89.15, 0.806; GCF_013009345.1, s__Acinetobacter geminorum, 95.0, 88.8, 0.8; GCF_013344765.1, s__Acinetobacter lactucae_A, 95.0, 88.55, 0.856; GCF_001605885…	98.83	11	N/A	N/A
NARA308-r-srp-R10-Guppy-FAST-new	d__Bacteria;p__Pseudomonadota;c__Gammaproteobacteria;o__Pseudomonadales;f__Moraxellaceae;g__Acinetobacter;s__Acinetobacter baumannii	GCF_009759685.1	95	d__Bacteria;p__Pseudomonadota;c__Gammaproteobacteria;o__Pseudomonadales;f__Moraxellaceae;g__Acinetobacter;s__Acinetobacter baumannii	97.84	0.886	GCF_009759685.1	95	d__Bacteria;p__Pseudomonadota;c__Gammaproteobacteria;o__Pseudomonadales;f__Moraxellaceae;g__Acinetobacter;s__Acinetobacter baumannii	97.84	0.886	d__Bacteria;p__Pseudomonadota;c__Gammaproteobacteria;o__Pseudomonadales;f__Moraxellaceae;g__Acinetobacter;s__	taxonomic classification defined by topology and ANI	topological placement and ANI have congruent species assignments	GCF_000368085.1, s__Acinetobacter nosocomialis, 95.0, 92.07, 0.86; GCF_000368065.1, s__Acinetobacter seifertii, 95.0, 90.43, 0.74; GCF_002928115.1, s__Acinetobacter pittii_H, 95.0, 89.19, 0.827; GCF_000369045.1, s__Acinetobacter pittii, 95.0, 89.1, 0.812; GCF_013009345.1, s__Acinetobacter geminorum, 95.0, 88.77, 0.805; GCF_001605885.1, s__Acinetobacter lactucae, 95.0, 88.57, 0.826; GCF_013344765.…	98.83	11	N/A	N/A
NARA308-r-srp-R10-Guppy-HAC-new	d__Bacteria;p__Pseudomonadota;c__Gammaproteobacteria;o__Pseudomonadales;f__Moraxellaceae;g__Acinetobacter;s__Acinetobacter baumannii	GCF_009759685.1	95	d__Bacteria;p__Pseudomonadota;c__Gammaproteobacteria;o__Pseudomonadales;f__Moraxellaceae;g__Acinetobacter;s__Acinetobacter baumannii	97.82	0.884	GCF_009759685.1	95	d__Bacteria;p__Pseudomonadota;c__Gammaproteobacteria;o__Pseudomonadales;f__Moraxellaceae;g__Acinetobacter;s__Acinetobacter baumannii	97.82	0.884	d__Bacteria;p__Pseudomonadota;c__Gammaproteobacteria;o__Pseudomonadales;f__Moraxellaceae;g__Acinetobacter;s__	taxonomic classification defined by topology and ANI	topological placement and ANI have congruent species assignments	GCF_000368085.1, s__Acinetobacter nosocomialis, 95.0, 92.04, 0.856; GCF_000368065.1, s__Acinetobacter seifertii, 95.0, 90.4, 0.751; GCF_002928115.1, s__Acinetobacter pittii_H, 95.0, 89.22, 0.827; GCF_000369045.1, s__Acinetobacter pittii, 95.0, 89.09, 0.816; GCF_013009345.1, s__Acinetobacter geminorum, 95.0, 88.85, 0.802; GCF_013344765.1, s__Acinetobacter lactucae_A, 95.0, 88.57, 0.859; GCF_001605…	98.83	11	N/A	N/A
NARA308-r-srp-R10-Guppy-SUP-new	d__Bacteria;p__Pseudomonadota;c__Gammaproteobacteria;o__Pseudomonadales;f__Moraxellaceae;g__Acinetobacter;s__Acinetobacter baumannii	GCF_009759685.1	95	d__Bacteria;p__Pseudomonadota;c__Gammaproteobacteria;o__Pseudomonadales;f__Moraxellaceae;g__Acinetobacter;s__Acinetobacter baumannii	97.82	0.886	GCF_009759685.1	95	d__Bacteria;p__Pseudomonadota;c__Gammaproteobacteria;o__Pseudomonadales;f__Moraxellaceae;g__Acinetobacter;s__Acinetobacter baumannii	97.82	0.886	d__Bacteria;p__Pseudomonadota;c__Gammaproteobacteria;o__Pseudomonadales;f__Moraxellaceae;g__Acinetobacter;s__	taxonomic classification defined by topology and ANI	topological placement and ANI have congruent species assignments	GCF_000368085.1, s__Acinetobacter nosocomialis, 95.0, 92.05, 0.854; GCF_000368065.1, s__Acinetobacter seifertii, 95.0, 90.38, 0.753; GCF_002928115.1, s__Acinetobacter pittii_H, 95.0, 89.26, 0.824; GCF_000369045.1, s__Acinetobacter pittii, 95.0, 89.03, 0.824; GCF_013009345.1, s__Acinetobacter geminorum, 95.0, 88.88, 0.809; GCF_001605885.1, s__Acinetobacter lactucae, 95.0, 88.61, 0.819; GCF_0133447…	98.83	11	N/A	N/A
NARA308-r-srp-R10-Rerio-SUP-new	d__Bacteria;p__Pseudomonadota;c__Gammaproteobacteria;o__Pseudomonadales;f__Moraxellaceae;g__Acinetobacter;s__Acinetobacter baumannii	GCF_009759685.1	95	d__Bacteria;p__Pseudomonadota;c__Gammaproteobacteria;o__Pseudomonadales;f__Moraxellaceae;g__Acinetobacter;s__Acinetobacter baumannii	97.85	0.884	GCF_009759685.1	95	d__Bacteria;p__Pseudomonadota;c__Gammaproteobacteria;o__Pseudomonadales;f__Moraxellaceae;g__Acinetobacter;s__Acinetobacter baumannii	97.85	0.884	d__Bacteria;p__Pseudomonadota;c__Gammaproteobacteria;o__Pseudomonadales;f__Moraxellaceae;g__Acinetobacter;s__	taxonomic classification defined by topology and ANI	topological placement and ANI have congruent species assignments	GCF_000368085.1, s__Acinetobacter nosocomialis, 95.0, 92.08, 0.856; GCF_000368065.1, s__Acinetobacter seifertii, 95.0, 90.42, 0.741; GCF_002928115.1, s__Acinetobacter pittii_H, 95.0, 89.21, 0.823; GCF_000369045.1, s__Acinetobacter pittii, 95.0, 89.14, 0.809; GCF_013009345.1, s__Acinetobacter geminorum, 95.0, 88.76, 0.8; GCF_001605885.1, s__Acinetobacter lactucae, 95.0, 88.57, 0.826; GCF_013344765…	98.83	11	N/A	N/A
NARA308-r-srp-R9-Dorado-FAST-new	d__Bacteria;p__Pseudomonadota;c__Gammaproteobacteria;o__Pseudomonadales;f__Moraxellaceae;g__Acinetobacter;s__Acinetobacter baumannii	GCF_009759685.1	95	d__Bacteria;p__Pseudomonadota;c__Gammaproteobacteria;o__Pseudomonadales;f__Moraxellaceae;g__Acinetobacter;s__Acinetobacter baumannii	97.82	0.885	GCF_009759685.1	95	d__Bacteria;p__Pseudomonadota;c__Gammaproteobacteria;o__Pseudomonadales;f__Moraxellaceae;g__Acinetobacter;s__Acinetobacter baumannii	97.82	0.885	d__Bacteria;p__Pseudomonadota;c__Gammaproteobacteria;o__Pseudomonadales;f__Moraxellaceae;g__Acinetobacter;s__	taxonomic classification defined by topology and ANI	topological placement and ANI have congruent species assignments	GCF_000368085.1, s__Acinetobacter nosocomialis, 95.0, 92.1, 0.862; GCF_000368065.1, s__Acinetobacter seifertii, 95.0, 90.43, 0.747; GCF_002928115.1, s__Acinetobacter pittii_H, 95.0, 89.25, 0.831; GCF_000369045.1, s__Acinetobacter pittii, 95.0, 89.1, 0.82; GCF_013009345.1, s__Acinetobacter geminorum, 95.0, 88.88, 0.792; GCF_001605885.1, s__Acinetobacter lactucae, 95.0, 88.64, 0.807; GCF_000399685.…	98.83	11	N/A	N/A
NARA308-r-srp-R9-Dorado-HAC-new	d__Bacteria;p__Pseudomonadota;c__Gammaproteobacteria;o__Pseudomonadales;f__Moraxellaceae;g__Acinetobacter;s__Acinetobacter baumannii	GCF_009759685.1	95	d__Bacteria;p__Pseudomonadota;c__Gammaproteobacteria;o__Pseudomonadales;f__Moraxellaceae;g__Acinetobacter;s__Acinetobacter baumannii	97.82	0.887	GCF_009759685.1	95	d__Bacteria;p__Pseudomonadota;c__Gammaproteobacteria;o__Pseudomonadales;f__Moraxellaceae;g__Acinetobacter;s__Acinetobacter baumannii	97.82	0.887	d__Bacteria;p__Pseudomonadota;c__Gammaproteobacteria;o__Pseudomonadales;f__Moraxellaceae;g__Acinetobacter;s__	taxonomic classification defined by topology and ANI	topological placement and ANI have congruent species assignments	GCF_000368085.1, s__Acinetobacter nosocomialis, 95.0, 92.08, 0.857; GCF_000368065.1, s__Acinetobacter seifertii, 95.0, 90.41, 0.749; GCF_002928115.1, s__Acinetobacter pittii_H, 95.0, 89.23, 0.831; GCF_000369045.1, s__Acinetobacter pittii, 95.0, 89.12, 0.814; GCF_013009345.1, s__Acinetobacter geminorum, 95.0, 88.88, 0.787; GCF_001605885.1, s__Acinetobacter lactucae, 95.0, 88.64, 0.807; GCF_0003996…	98.83	11	N/A	N/A
NARA308-r-srp-R9-Dorado-SUP-new	d__Bacteria;p__Pseudomonadota;c__Gammaproteobacteria;o__Pseudomonadales;f__Moraxellaceae;g__Acinetobacter;s__Acinetobacter baumannii	GCF_009759685.1	95	d__Bacteria;p__Pseudomonadota;c__Gammaproteobacteria;o__Pseudomonadales;f__Moraxellaceae;g__Acinetobacter;s__Acinetobacter baumannii	97.82	0.885	GCF_009759685.1	95	d__Bacteria;p__Pseudomonadota;c__Gammaproteobacteria;o__Pseudomonadales;f__Moraxellaceae;g__Acinetobacter;s__Acinetobacter baumannii	97.82	0.885	d__Bacteria;p__Pseudomonadota;c__Gammaproteobacteria;o__Pseudomonadales;f__Moraxellaceae;g__Acinetobacter;s__	taxonomic classification defined by topology and ANI	topological placement and ANI have congruent species assignments	GCF_000368085.1, s__Acinetobacter nosocomialis, 95.0, 92.1, 0.863; GCF_000368065.1, s__Acinetobacter seifertii, 95.0, 90.43, 0.748; GCF_002928115.1, s__Acinetobacter pittii_H, 95.0, 89.24, 0.832; GCF_000369045.1, s__Acinetobacter pittii, 95.0, 89.09, 0.819; GCF_013009345.1, s__Acinetobacter geminorum, 95.0, 88.9, 0.791; GCF_001605885.1, s__Acinetobacter lactucae, 95.0, 88.64, 0.807; GCF_000399685…	98.83	11	N/A	N/A
NARA308-r-srp-R9-Guppy-FAST-new	d__Bacteria;p__Pseudomonadota;c__Gammaproteobacteria;o__Pseudomonadales;f__Moraxellaceae;g__Acinetobacter;s__Acinetobacter baumannii	GCF_009759685.1	95	d__Bacteria;p__Pseudomonadota;c__Gammaproteobacteria;o__Pseudomonadales;f__Moraxellaceae;g__Acinetobacter;s__Acinetobacter baumannii	97.85	0.883	GCF_009759685.1	95	d__Bacteria;p__Pseudomonadota;c__Gammaproteobacteria;o__Pseudomonadales;f__Moraxellaceae;g__Acinetobacter;s__Acinetobacter baumannii	97.85	0.883	d__Bacteria;p__Pseudomonadota;c__Gammaproteobacteria;o__Pseudomonadales;f__Moraxellaceae;g__Acinetobacter;s__	taxonomic classification defined by topology and ANI	topological placement and ANI have congruent species assignments	GCF_000368085.1, s__Acinetobacter nosocomialis, 95.0, 92.11, 0.863; GCF_000368065.1, s__Acinetobacter seifertii, 95.0, 90.42, 0.748; GCF_002928115.1, s__Acinetobacter pittii_H, 95.0, 89.24, 0.828; GCF_000369045.1, s__Acinetobacter pittii, 95.0, 89.15, 0.815; GCF_013009345.1, s__Acinetobacter geminorum, 95.0, 88.87, 0.797; GCF_001605885.1, s__Acinetobacter lactucae, 95.0, 88.57, 0.825; GCF_0133447…	98.83	11	N/A	N/A
NARA308-r-srp-R9-Guppy-HAC-new	d__Bacteria;p__Pseudomonadota;c__Gammaproteobacteria;o__Pseudomonadales;f__Moraxellaceae;g__Acinetobacter;s__Acinetobacter baumannii	GCF_009759685.1	95	d__Bacteria;p__Pseudomonadota;c__Gammaproteobacteria;o__Pseudomonadales;f__Moraxellaceae;g__Acinetobacter;s__Acinetobacter baumannii	97.82	0.88	GCF_009759685.1	95	d__Bacteria;p__Pseudomonadota;c__Gammaproteobacteria;o__Pseudomonadales;f__Moraxellaceae;g__Acinetobacter;s__Acinetobacter baumannii	97.82	0.88	d__Bacteria;p__Pseudomonadota;c__Gammaproteobacteria;o__Pseudomonadales;f__Moraxellaceae;g__Acinetobacter;s__	taxonomic classification defined by topology and ANI	topological placement and ANI have congruent species assignments	GCF_000368085.1, s__Acinetobacter nosocomialis, 95.0, 92.08, 0.865; GCF_000368065.1, s__Acinetobacter seifertii, 95.0, 90.43, 0.745; GCF_002928115.1, s__Acinetobacter pittii_H, 95.0, 89.23, 0.83; GCF_000369045.1, s__Acinetobacter pittii, 95.0, 89.12, 0.817; GCF_013009345.1, s__Acinetobacter geminorum, 95.0, 88.87, 0.79; GCF_001605885.1, s__Acinetobacter lactucae, 95.0, 88.6, 0.816; GCF_013344765.…	98.83	11	N/A	N/A
NARA308-r-srp-R9-Guppy-SUP-new	d__Bacteria;p__Pseudomonadota;c__Gammaproteobacteria;o__Pseudomonadales;f__Moraxellaceae;g__Acinetobacter;s__Acinetobacter baumannii	GCF_009759685.1	95	d__Bacteria;p__Pseudomonadota;c__Gammaproteobacteria;o__Pseudomonadales;f__Moraxellaceae;g__Acinetobacter;s__Acinetobacter baumannii	97.81	0.886	GCF_009759685.1	95	d__Bacteria;p__Pseudomonadota;c__Gammaproteobacteria;o__Pseudomonadales;f__Moraxellaceae;g__Acinetobacter;s__Acinetobacter baumannii	97.81	0.886	d__Bacteria;p__Pseudomonadota;c__Gammaproteobacteria;o__Pseudomonadales;f__Moraxellaceae;g__Acinetobacter;s__	taxonomic classification defined by topology and ANI	topological placement and ANI have congruent species assignments	GCF_000368085.1, s__Acinetobacter nosocomialis, 95.0, 92.07, 0.857; GCF_000368065.1, s__Acinetobacter seifertii, 95.0, 90.39, 0.749; GCF_002928115.1, s__Acinetobacter pittii_H, 95.0, 89.25, 0.833; GCF_000369045.1, s__Acinetobacter pittii, 95.0, 89.15, 0.815; GCF_013009345.1, s__Acinetobacter geminorum, 95.0, 88.86, 0.792; GCF_013344765.1, s__Acinetobacter lactucae_A, 95.0, 88.58, 0.863; GCF_00160…	98.83	11	N/A	N/A

## Sheet: acipit
user_genome	classification	fastani_reference	fastani_reference_radius	fastani_taxonomy	fastani_ani	fastani_af	closest_placement_reference	closest_placement_radius	closest_placement_taxonomy	closest_placement_ani	closest_placement_af	pplacer_taxonomy	classification_method	note	other_related_references(genome_id,species_name,radius,ANI,AF)	msa_percent	translation_table	red_value	warnings
500441-22-s-R10-Dorado-FAST	d__Bacteria;p__Pseudomonadota;c__Gammaproteobacteria;o__Pseudomonadales;f__Moraxellaceae;g__Acinetobacter;s__Acinetobacter pittii	GCF_000369045.1	95	d__Bacteria;p__Pseudomonadota;c__Gammaproteobacteria;o__Pseudomonadales;f__Moraxellaceae;g__Acinetobacter;s__Acinetobacter pittii	97.53	0.934	GCF_000369045.1	95	d__Bacteria;p__Pseudomonadota;c__Gammaproteobacteria;o__Pseudomonadales;f__Moraxellaceae;g__Acinetobacter;s__Acinetobacter pittii	97.53	0.934	d__Bacteria;p__Pseudomonadota;c__Gammaproteobacteria;o__Pseudomonadales;f__Moraxellaceae;g__Acinetobacter;s__	taxonomic classification defined by topology and ANI	topological placement and ANI have congruent species assignments	GCF_013009345.1, s__Acinetobacter geminorum, 95.0, 94.81, 0.888; GCF_002928115.1, s__Acinetobacter pittii_H, 95.0, 94.53, 0.86; GCF_001605885.1, s__Acinetobacter lactucae, 95.0, 93.41, 0.861; GCF_013344765.1, s__Acinetobacter lactucae_A, 95.0, 93.25, 0.898; GCF_000399685.1, s__Acinetobacter pittii_E, 95.0, 92.66, 0.835; GCF_000196795.1, s__Acinetobacter oleivorans, 95.0, 91.52, 0.819; GCF_0003139…	96.5	11	N/A	N/A
500441-22-s-R10-Dorado-FAST-Medaka-2.0	d__Bacteria;p__Pseudomonadota;c__Gammaproteobacteria;o__Pseudomonadales;f__Moraxellaceae;g__Acinetobacter;s__Acinetobacter pittii	GCF_000369045.1	95	d__Bacteria;p__Pseudomonadota;c__Gammaproteobacteria;o__Pseudomonadales;f__Moraxellaceae;g__Acinetobacter;s__Acinetobacter pittii	97.49	0.935	GCF_000369045.1	95	d__Bacteria;p__Pseudomonadota;c__Gammaproteobacteria;o__Pseudomonadales;f__Moraxellaceae;g__Acinetobacter;s__Acinetobacter pittii	97.49	0.935	d__Bacteria;p__Pseudomonadota;c__Gammaproteobacteria;o__Pseudomonadales;f__Moraxellaceae;g__Acinetobacter;s__	taxonomic classification defined by topology and ANI	topological placement and ANI have congruent species assignments	GCF_013009345.1, s__Acinetobacter geminorum, 95.0, 94.74, 0.882; GCF_002928115.1, s__Acinetobacter pittii_H, 95.0, 94.49, 0.856; GCF_001605885.1, s__Acinetobacter lactucae, 95.0, 93.44, 0.858; GCF_013344765.1, s__Acinetobacter lactucae_A, 95.0, 93.22, 0.889; GCF_000399685.1, s__Acinetobacter pittii_E, 95.0, 92.6, 0.833; GCF_000196795.1, s__Acinetobacter oleivorans, 95.0, 91.42, 0.829; GCF_0003139…	87.41	11	N/A	N/A
500441-22-s-R10-Dorado-FAST-flye	d__Bacteria;p__Pseudomonadota;c__Gammaproteobacteria;o__Pseudomonadales;f__Moraxellaceae;g__Acinetobacter;s__Acinetobacter pittii	GCF_000369045.1	95	d__Bacteria;p__Pseudomonadota;c__Gammaproteobacteria;o__Pseudomonadales;f__Moraxellaceae;g__Acinetobacter;s__Acinetobacter pittii	97.47	0.921	GCF_000369045.1	95	d__Bacteria;p__Pseudomonadota;c__Gammaproteobacteria;o__Pseudomonadales;f__Moraxellaceae;g__Acinetobacter;s__Acinetobacter pittii	97.47	0.921	d__Bacteria;p__Pseudomonadota;c__Gammaproteobacteria;o__Pseudomonadales;f__Moraxellaceae;g__Acinetobacter;s__	taxonomic classification defined by topology and ANI	topological placement and ANI have congruent species assignments	GCF_013009345.1, s__Acinetobacter geminorum, 95.0, 94.81, 0.884; GCF_002928115.1, s__Acinetobacter pittii_H, 95.0, 94.5, 0.85; GCF_001605885.1, s__Acinetobacter lactucae, 95.0, 93.38, 0.861; GCF_013344765.1, s__Acinetobacter lactucae_A, 95.0, 93.19, 0.896; GCF_000399685.1, s__Acinetobacter pittii_E, 95.0, 92.57, 0.832; GCF_000196795.1, s__Acinetobacter oleivorans, 95.0, 91.39, 0.825; GCF_00031393…	83.34	11	N/A	N/A
500441-22-s-R10-Dorado-HAC	d__Bacteria;p__Pseudomonadota;c__Gammaproteobacteria;o__Pseudomonadales;f__Moraxellaceae;g__Acinetobacter;s__Acinetobacter pittii	GCF_000369045.1	95	d__Bacteria;p__Pseudomonadota;c__Gammaproteobacteria;o__Pseudomonadales;f__Moraxellaceae;g__Acinetobacter;s__Acinetobacter pittii	97.55	0.934	GCF_000369045.1	95	d__Bacteria;p__Pseudomonadota;c__Gammaproteobacteria;o__Pseudomonadales;f__Moraxellaceae;g__Acinetobacter;s__Acinetobacter pittii	97.55	0.934	d__Bacteria;p__Pseudomonadota;c__Gammaproteobacteria;o__Pseudomonadales;f__Moraxellaceae;g__Acinetobacter;s__	taxonomic classification defined by topology and ANI	topological placement and ANI have congruent species assignments	GCF_013009345.1, s__Acinetobacter geminorum, 95.0, 94.79, 0.883; GCF_002928115.1, s__Acinetobacter pittii_H, 95.0, 94.55, 0.857; GCF_001605885.1, s__Acinetobacter lactucae, 95.0, 93.46, 0.859; GCF_013344765.1, s__Acinetobacter lactucae_A, 95.0, 93.24, 0.893; GCF_000399685.1, s__Acinetobacter pittii_E, 95.0, 92.67, 0.836; GCF_000196795.1, s__Acinetobacter oleivorans, 95.0, 91.47, 0.829; GCF_000313…	97.18	11	N/A	N/A
500441-22-s-R10-Dorado-HAC-Medaka-2.0	d__Bacteria;p__Pseudomonadota;c__Gammaproteobacteria;o__Pseudomonadales;f__Moraxellaceae;g__Acinetobacter;s__Acinetobacter pittii	GCF_000369045.1	95	d__Bacteria;p__Pseudomonadota;c__Gammaproteobacteria;o__Pseudomonadales;f__Moraxellaceae;g__Acinetobacter;s__Acinetobacter pittii	97.55	0.934	GCF_000369045.1	95	d__Bacteria;p__Pseudomonadota;c__Gammaproteobacteria;o__Pseudomonadales;f__Moraxellaceae;g__Acinetobacter;s__Acinetobacter pittii	97.55	0.934	d__Bacteria;p__Pseudomonadota;c__Gammaproteobacteria;o__Pseudomonadales;f__Moraxellaceae;g__Acinetobacter;s__	taxonomic classification defined by topology and ANI	topological placement and ANI have congruent species assignments	GCF_013009345.1, s__Acinetobacter geminorum, 95.0, 94.79, 0.883; GCF_002928115.1, s__Acinetobacter pittii_H, 95.0, 94.55, 0.857; GCF_001605885.1, s__Acinetobacter lactucae, 95.0, 93.46, 0.86; GCF_013344765.1, s__Acinetobacter lactucae_A, 95.0, 93.24, 0.893; GCF_000399685.1, s__Acinetobacter pittii_E, 95.0, 92.68, 0.836; GCF_000196795.1, s__Acinetobacter oleivorans, 95.0, 91.46, 0.829; GCF_0003139…	98.01	11	N/A	N/A
500441-22-s-R10-Dorado-HAC-flye	d__Bacteria;p__Pseudomonadota;c__Gammaproteobacteria;o__Pseudomonadales;f__Moraxellaceae;g__Acinetobacter;s__Acinetobacter pittii	GCF_000369045.1	95	d__Bacteria;p__Pseudomonadota;c__Gammaproteobacteria;o__Pseudomonadales;f__Moraxellaceae;g__Acinetobacter;s__Acinetobacter pittii	97.56	0.929	GCF_000369045.1	95	d__Bacteria;p__Pseudomonadota;c__Gammaproteobacteria;o__Pseudomonadales;f__Moraxellaceae;g__Acinetobacter;s__Acinetobacter pittii	97.56	0.929	d__Bacteria;p__Pseudomonadota;c__Gammaproteobacteria;o__Pseudomonadales;f__Moraxellaceae;g__Acinetobacter;s__	taxonomic classification defined by topology and ANI	topological placement and ANI have congruent species assignments	GCF_013009345.1, s__Acinetobacter geminorum, 95.0, 94.8, 0.884; GCF_002928115.1, s__Acinetobacter pittii_H, 95.0, 94.56, 0.859; GCF_001605885.1, s__Acinetobacter lactucae, 95.0, 93.5, 0.861; GCF_013344765.1, s__Acinetobacter lactucae_A, 95.0, 93.26, 0.889; GCF_000399685.1, s__Acinetobacter pittii_E, 95.0, 92.63, 0.84; GCF_000196795.1, s__Acinetobacter oleivorans, 95.0, 91.52, 0.821; GCF_000313935…	97.8	11	N/A	N/A
500441-22-s-R10-Dorado-SUP	d__Bacteria;p__Pseudomonadota;c__Gammaproteobacteria;o__Pseudomonadales;f__Moraxellaceae;g__Acinetobacter;s__Acinetobacter pittii	GCF_000369045.1	95	d__Bacteria;p__Pseudomonadota;c__Gammaproteobacteria;o__Pseudomonadales;f__Moraxellaceae;g__Acinetobacter;s__Acinetobacter pittii	97.54	0.929	GCF_000369045.1	95	d__Bacteria;p__Pseudomonadota;c__Gammaproteobacteria;o__Pseudomonadales;f__Moraxellaceae;g__Acinetobacter;s__Acinetobacter pittii	97.54	0.929	d__Bacteria;p__Pseudomonadota;c__Gammaproteobacteria;o__Pseudomonadales;f__Moraxellaceae;g__Acinetobacter;s__	taxonomic classification defined by topology and ANI	topological placement and ANI have congruent species assignments	GCF_013009345.1, s__Acinetobacter geminorum, 95.0, 94.9, 0.869; GCF_002928115.1, s__Acinetobacter pittii_H, 95.0, 94.64, 0.852; GCF_001605885.1, s__Acinetobacter lactucae, 95.0, 93.46, 0.852; GCF_013344765.1, s__Acinetobacter lactucae_A, 95.0, 93.28, 0.893; GCF_000399685.1, s__Acinetobacter pittii_E, 95.0, 92.69, 0.831; GCF_000196795.1, s__Acinetobacter oleivorans, 95.0, 91.51, 0.824; GCF_0003139…	98.01	11	N/A	N/A
500441-22-s-R10-Dorado-SUP-Medaka-2.0	d__Bacteria;p__Pseudomonadota;c__Gammaproteobacteria;o__Pseudomonadales;f__Moraxellaceae;g__Acinetobacter;s__Acinetobacter pittii	GCF_000369045.1	95	d__Bacteria;p__Pseudomonadota;c__Gammaproteobacteria;o__Pseudomonadales;f__Moraxellaceae;g__Acinetobacter;s__Acinetobacter pittii	97.54	0.929	GCF_000369045.1	95	d__Bacteria;p__Pseudomonadota;c__Gammaproteobacteria;o__Pseudomonadales;f__Moraxellaceae;g__Acinetobacter;s__Acinetobacter pittii	97.54	0.929	d__Bacteria;p__Pseudomonadota;c__Gammaproteobacteria;o__Pseudomonadales;f__Moraxellaceae;g__Acinetobacter;s__	taxonomic classification defined by topology and ANI	topological placement and ANI have congruent species assignments	GCF_013009345.1, s__Acinetobacter geminorum, 95.0, 94.9, 0.868; GCF_002928115.1, s__Acinetobacter pittii_H, 95.0, 94.64, 0.852; GCF_001605885.1, s__Acinetobacter lactucae, 95.0, 93.47, 0.852; GCF_013344765.1, s__Acinetobacter lactucae_A, 95.0, 93.28, 0.893; GCF_000399685.1, s__Acinetobacter pittii_E, 95.0, 92.69, 0.831; GCF_000196795.1, s__Acinetobacter oleivorans, 95.0, 91.52, 0.823; GCF_0003139…	98.01	11	N/A	N/A
500441-22-s-R10-Dorado-SUP-flye	d__Bacteria;p__Pseudomonadota;c__Gammaproteobacteria;o__Pseudomonadales;f__Moraxellaceae;g__Acinetobacter;s__Acinetobacter pittii	GCF_000369045.1	95	d__Bacteria;p__Pseudomonadota;c__Gammaproteobacteria;o__Pseudomonadales;f__Moraxellaceae;g__Acinetobacter;s__Acinetobacter pittii	97.59	0.928	GCF_000369045.1	95	d__Bacteria;p__Pseudomonadota;c__Gammaproteobacteria;o__Pseudomonadales;f__Moraxellaceae;g__Acinetobacter;s__Acinetobacter pittii	97.59	0.928	d__Bacteria;p__Pseudomonadota;c__Gammaproteobacteria;o__Pseudomonadales;f__Moraxellaceae;g__Acinetobacter;s__	taxonomic classification defined by topology and ANI	topological placement and ANI have congruent species assignments	GCF_013009345.1, s__Acinetobacter geminorum, 95.0, 94.85, 0.877; GCF_002928115.1, s__Acinetobacter pittii_H, 95.0, 94.62, 0.859; GCF_001605885.1, s__Acinetobacter lactucae, 95.0, 93.52, 0.848; GCF_013344765.1, s__Acinetobacter lactucae_A, 95.0, 93.26, 0.889; GCF_000399685.1, s__Acinetobacter pittii_E, 95.0, 92.67, 0.836; GCF_000196795.1, s__Acinetobacter oleivorans, 95.0, 91.5, 0.816; GCF_0003139…	98.01	11	N/A	N/A
500441-22-s-R10-Guppy-FAST	d__Bacteria;p__Pseudomonadota;c__Gammaproteobacteria;o__Pseudomonadales;f__Moraxellaceae;g__Acinetobacter;s__Acinetobacter pittii	GCF_000369045.1	95	d__Bacteria;p__Pseudomonadota;c__Gammaproteobacteria;o__Pseudomonadales;f__Moraxellaceae;g__Acinetobacter;s__Acinetobacter pittii	97.55	0.932	GCF_000369045.1	95	d__Bacteria;p__Pseudomonadota;c__Gammaproteobacteria;o__Pseudomonadales;f__Moraxellaceae;g__Acinetobacter;s__Acinetobacter pittii	97.55	0.932	d__Bacteria;p__Pseudomonadota;c__Gammaproteobacteria;o__Pseudomonadales;f__Moraxellaceae;g__Acinetobacter;s__	taxonomic classification defined by topology and ANI	topological placement and ANI have congruent species assignments	GCF_013009345.1, s__Acinetobacter geminorum, 95.0, 94.82, 0.884; GCF_002928115.1, s__Acinetobacter pittii_H, 95.0, 94.54, 0.86; GCF_001605885.1, s__Acinetobacter lactucae, 95.0, 93.51, 0.857; GCF_013344765.1, s__Acinetobacter lactucae_A, 95.0, 93.25, 0.896; GCF_000399685.1, s__Acinetobacter pittii_E, 95.0, 92.61, 0.836; GCF_000196795.1, s__Acinetobacter oleivorans, 95.0, 91.45, 0.842; GCF_0003139…	95.61	11	N/A	N/A
500441-22-s-R10-Guppy-FAST-Medaka-2.0	d__Bacteria;p__Pseudomonadota;c__Gammaproteobacteria;o__Pseudomonadales;f__Moraxellaceae;g__Acinetobacter;s__Acinetobacter pittii	GCF_000369045.1	95	d__Bacteria;p__Pseudomonadota;c__Gammaproteobacteria;o__Pseudomonadales;f__Moraxellaceae;g__Acinetobacter;s__Acinetobacter pittii	97.49	0.927	GCF_000369045.1	95	d__Bacteria;p__Pseudomonadota;c__Gammaproteobacteria;o__Pseudomonadales;f__Moraxellaceae;g__Acinetobacter;s__Acinetobacter pittii	97.49	0.927	d__Bacteria;p__Pseudomonadota;c__Gammaproteobacteria;o__Pseudomonadales;f__Moraxellaceae;g__Acinetobacter;s__	taxonomic classification defined by topology and ANI	topological placement and ANI have congruent species assignments	GCF_013009345.1, s__Acinetobacter geminorum, 95.0, 94.75, 0.884; GCF_002928115.1, s__Acinetobacter pittii_H, 95.0, 94.52, 0.854; GCF_001605885.1, s__Acinetobacter lactucae, 95.0, 93.47, 0.861; GCF_013344765.1, s__Acinetobacter lactucae_A, 95.0, 93.23, 0.897; GCF_000399685.1, s__Acinetobacter pittii_E, 95.0, 92.59, 0.834; GCF_000196795.1, s__Acinetobacter oleivorans, 95.0, 91.37, 0.84; GCF_0003139…	88.06	11	N/A	N/A
500441-22-s-R10-Guppy-FAST-flye	d__Bacteria;p__Pseudomonadota;c__Gammaproteobacteria;o__Pseudomonadales;f__Moraxellaceae;g__Acinetobacter;s__Acinetobacter pittii	GCF_000369045.1	95	d__Bacteria;p__Pseudomonadota;c__Gammaproteobacteria;o__Pseudomonadales;f__Moraxellaceae;g__Acinetobacter;s__Acinetobacter pittii	97.45	0.932	GCF_000369045.1	95	d__Bacteria;p__Pseudomonadota;c__Gammaproteobacteria;o__Pseudomonadales;f__Moraxellaceae;g__Acinetobacter;s__Acinetobacter pittii	97.45	0.932	d__Bacteria;p__Pseudomonadota;c__Gammaproteobacteria;o__Pseudomonadales;f__Moraxellaceae;g__Acinetobacter;s__	taxonomic classification defined by topology and ANI	topological placement and ANI have congruent species assignments	GCF_013009345.1, s__Acinetobacter geminorum, 95.0, 94.73, 0.88; GCF_002928115.1, s__Acinetobacter pittii_H, 95.0, 94.48, 0.858; GCF_001605885.1, s__Acinetobacter lactucae, 95.0, 93.39, 0.848; GCF_013344765.1, s__Acinetobacter lactucae_A, 95.0, 93.21, 0.883; GCF_000399685.1, s__Acinetobacter pittii_E, 95.0, 92.54, 0.833; GCF_000196795.1, s__Acinetobacter oleivorans, 95.0, 91.47, 0.818; GCF_0003139…	86.53	11	N/A	N/A
500441-22-s-R10-Guppy-HAC	d__Bacteria;p__Pseudomonadota;c__Gammaproteobacteria;o__Pseudomonadales;f__Moraxellaceae;g__Acinetobacter;s__Acinetobacter pittii	GCF_000369045.1	95	d__Bacteria;p__Pseudomonadota;c__Gammaproteobacteria;o__Pseudomonadales;f__Moraxellaceae;g__Acinetobacter;s__Acinetobacter pittii	97.57	0.931	GCF_000369045.1	95	d__Bacteria;p__Pseudomonadota;c__Gammaproteobacteria;o__Pseudomonadales;f__Moraxellaceae;g__Acinetobacter;s__Acinetobacter pittii	97.57	0.931	d__Bacteria;p__Pseudomonadota;c__Gammaproteobacteria;o__Pseudomonadales;f__Moraxellaceae;g__Acinetobacter;s__	taxonomic classification defined by topology and ANI	topological placement and ANI have congruent species assignments	GCF_013009345.1, s__Acinetobacter geminorum, 95.0, 94.87, 0.887; GCF_002928115.1, s__Acinetobacter pittii_H, 95.0, 94.6, 0.853; GCF_001605885.1, s__Acinetobacter lactucae, 95.0, 93.45, 0.856; GCF_013344765.1, s__Acinetobacter lactucae_A, 95.0, 93.32, 0.89; GCF_000399685.1, s__Acinetobacter pittii_E, 95.0, 92.65, 0.833; GCF_000196795.1, s__Acinetobacter oleivorans, 95.0, 91.49, 0.827; GCF_00031393…	97.74	11	N/A	N/A
500441-22-s-R10-Guppy-HAC-Medaka-2.0	d__Bacteria;p__Pseudomonadota;c__Gammaproteobacteria;o__Pseudomonadales;f__Moraxellaceae;g__Acinetobacter;s__Acinetobacter pittii	GCF_000369045.1	95	d__Bacteria;p__Pseudomonadota;c__Gammaproteobacteria;o__Pseudomonadales;f__Moraxellaceae;g__Acinetobacter;s__Acinetobacter pittii	97.59	0.928	GCF_000369045.1	95	d__Bacteria;p__Pseudomonadota;c__Gammaproteobacteria;o__Pseudomonadales;f__Moraxellaceae;g__Acinetobacter;s__Acinetobacter pittii	97.59	0.928	d__Bacteria;p__Pseudomonadota;c__Gammaproteobacteria;o__Pseudomonadales;f__Moraxellaceae;g__Acinetobacter;s__	taxonomic classification defined by topology and ANI	topological placement and ANI have congruent species assignments	GCF_013009345.1, s__Acinetobacter geminorum, 95.0, 94.86, 0.884; GCF_002928115.1, s__Acinetobacter pittii_H, 95.0, 94.6, 0.852; GCF_001605885.1, s__Acinetobacter lactucae, 95.0, 93.45, 0.855; GCF_013344765.1, s__Acinetobacter lactucae_A, 95.0, 93.32, 0.891; GCF_000399685.1, s__Acinetobacter pittii_E, 95.0, 92.66, 0.832; GCF_000196795.1, s__Acinetobacter oleivorans, 95.0, 91.5, 0.827; GCF_00031393…	97.74	11	N/A	N/A
500441-22-s-R10-Guppy-HAC-flye	d__Bacteria;p__Pseudomonadota;c__Gammaproteobacteria;o__Pseudomonadales;f__Moraxellaceae;g__Acinetobacter;s__Acinetobacter pittii	GCF_000369045.1	95	d__Bacteria;p__Pseudomonadota;c__Gammaproteobacteria;o__Pseudomonadales;f__Moraxellaceae;g__Acinetobacter;s__Acinetobacter pittii	97.58	0.927	GCF_000369045.1	95	d__Bacteria;p__Pseudomonadota;c__Gammaproteobacteria;o__Pseudomonadales;f__Moraxellaceae;g__Acinetobacter;s__Acinetobacter pittii	97.58	0.927	d__Bacteria;p__Pseudomonadota;c__Gammaproteobacteria;o__Pseudomonadales;f__Moraxellaceae;g__Acinetobacter;s__	taxonomic classification defined by topology and ANI	topological placement and ANI have congruent species assignments	GCF_013009345.1, s__Acinetobacter geminorum, 95.0, 94.83, 0.88; GCF_002928115.1, s__Acinetobacter pittii_H, 95.0, 94.6, 0.852; GCF_001605885.1, s__Acinetobacter lactucae, 95.0, 93.53, 0.856; GCF_013344765.1, s__Acinetobacter lactucae_A, 95.0, 93.29, 0.886; GCF_000399685.1, s__Acinetobacter pittii_E, 95.0, 92.64, 0.833; GCF_000196795.1, s__Acinetobacter oleivorans, 95.0, 91.56, 0.819; GCF_00031393…	98.01	11	N/A	N/A
500441-22-s-R10-Guppy-SUP	d__Bacteria;p__Pseudomonadota;c__Gammaproteobacteria;o__Pseudomonadales;f__Moraxellaceae;g__Acinetobacter;s__Acinetobacter pittii	GCF_000369045.1	95	d__Bacteria;p__Pseudomonadota;c__Gammaproteobacteria;o__Pseudomonadales;f__Moraxellaceae;g__Acinetobacter;s__Acinetobacter pittii	97.55	0.935	GCF_000369045.1	95	d__Bacteria;p__Pseudomonadota;c__Gammaproteobacteria;o__Pseudomonadales;f__Moraxellaceae;g__Acinetobacter;s__Acinetobacter pittii	97.55	0.935	d__Bacteria;p__Pseudomonadota;c__Gammaproteobacteria;o__Pseudomonadales;f__Moraxellaceae;g__Acinetobacter;s__	taxonomic classification defined by topology and ANI	topological placement and ANI have congruent species assignments	GCF_013009345.1, s__Acinetobacter geminorum, 95.0, 94.78, 0.882; GCF_002928115.1, s__Acinetobacter pittii_H, 95.0, 94.56, 0.855; GCF_001605885.1, s__Acinetobacter lactucae, 95.0, 93.46, 0.86; GCF_013344765.1, s__Acinetobacter lactucae_A, 95.0, 93.26, 0.892; GCF_000399685.1, s__Acinetobacter pittii_E, 95.0, 92.67, 0.836; GCF_000196795.1, s__Acinetobacter oleivorans, 95.0, 91.46, 0.837; GCF_0003139…	98.01	11	N/A	N/A
500441-22-s-R10-Guppy-SUP-Medaka-2.0	d__Bacteria;p__Pseudomonadota;c__Gammaproteobacteria;o__Pseudomonadales;f__Moraxellaceae;g__Acinetobacter;s__Acinetobacter pittii	GCF_000369045.1	95	d__Bacteria;p__Pseudomonadota;c__Gammaproteobacteria;o__Pseudomonadales;f__Moraxellaceae;g__Acinetobacter;s__Acinetobacter pittii	97.56	0.935	GCF_000369045.1	95	d__Bacteria;p__Pseudomonadota;c__Gammaproteobacteria;o__Pseudomonadales;f__Moraxellaceae;g__Acinetobacter;s__Acinetobacter pittii	97.56	0.935	d__Bacteria;p__Pseudomonadota;c__Gammaproteobacteria;o__Pseudomonadales;f__Moraxellaceae;g__Acinetobacter;s__	taxonomic classification defined by topology and ANI	topological placement and ANI have congruent species assignments	GCF_013009345.1, s__Acinetobacter geminorum, 95.0, 94.78, 0.882; GCF_002928115.1, s__Acinetobacter pittii_H, 95.0, 94.56, 0.856; GCF_001605885.1, s__Acinetobacter lactucae, 95.0, 93.46, 0.86; GCF_013344765.1, s__Acinetobacter lactucae_A, 95.0, 93.26, 0.892; GCF_000399685.1, s__Acinetobacter pittii_E, 95.0, 92.67, 0.836; GCF_000196795.1, s__Acinetobacter oleivorans, 95.0, 91.46, 0.837; GCF_0003139…	98.01	11	N/A	N/A
500441-22-s-R10-Guppy-SUP-flye	d__Bacteria;p__Pseudomonadota;c__Gammaproteobacteria;o__Pseudomonadales;f__Moraxellaceae;g__Acinetobacter;s__Acinetobacter pittii	GCF_000369045.1	95	d__Bacteria;p__Pseudomonadota;c__Gammaproteobacteria;o__Pseudomonadales;f__Moraxellaceae;g__Acinetobacter;s__Acinetobacter pittii	97.56	0.93	GCF_000369045.1	95	d__Bacteria;p__Pseudomonadota;c__Gammaproteobacteria;o__Pseudomonadales;f__Moraxellaceae;g__Acinetobacter;s__Acinetobacter pittii	97.56	0.93	d__Bacteria;p__Pseudomonadota;c__Gammaproteobacteria;o__Pseudomonadales;f__Moraxellaceae;g__Acinetobacter;s__	taxonomic classification defined by topology and ANI	topological placement and ANI have congruent species assignments	GCF_013009345.1, s__Acinetobacter geminorum, 95.0, 94.83, 0.88; GCF_002928115.1, s__Acinetobacter pittii_H, 95.0, 94.57, 0.863; GCF_001605885.1, s__Acinetobacter lactucae, 95.0, 93.51, 0.855; GCF_013344765.1, s__Acinetobacter lactucae_A, 95.0, 93.25, 0.891; GCF_000399685.1, s__Acinetobacter pittii_E, 95.0, 92.64, 0.837; GCF_000196795.1, s__Acinetobacter oleivorans, 95.0, 91.52, 0.826; GCF_0003139…	98.01	11	N/A	N/A
500441-22-s-R10-Rerio-SUP	d__Bacteria;p__Pseudomonadota;c__Gammaproteobacteria;o__Pseudomonadales;f__Moraxellaceae;g__Acinetobacter;s__Acinetobacter pittii	GCF_000369045.1	95	d__Bacteria;p__Pseudomonadota;c__Gammaproteobacteria;o__Pseudomonadales;f__Moraxellaceae;g__Acinetobacter;s__Acinetobacter pittii	97.55	0.934	GCF_000369045.1	95	d__Bacteria;p__Pseudomonadota;c__Gammaproteobacteria;o__Pseudomonadales;f__Moraxellaceae;g__Acinetobacter;s__Acinetobacter pittii	97.55	0.934	d__Bacteria;p__Pseudomonadota;c__Gammaproteobacteria;o__Pseudomonadales;f__Moraxellaceae;g__Acinetobacter;s__	taxonomic classification defined by topology and ANI	topological placement and ANI have congruent species assignments	GCF_013009345.1, s__Acinetobacter geminorum, 95.0, 94.81, 0.883; GCF_002928115.1, s__Acinetobacter pittii_H, 95.0, 94.56, 0.856; GCF_001605885.1, s__Acinetobacter lactucae, 95.0, 93.46, 0.859; GCF_013344765.1, s__Acinetobacter lactucae_A, 95.0, 93.24, 0.893; GCF_000399685.1, s__Acinetobacter pittii_E, 95.0, 92.67, 0.836; GCF_000196795.1, s__Acinetobacter oleivorans, 95.0, 91.46, 0.827; GCF_000313…	98.01	11	N/A	N/A
500441-22-s-R9-Dorado-FAST	d__Bacteria;p__Pseudomonadota;c__Gammaproteobacteria;o__Pseudomonadales;f__Moraxellaceae;g__Acinetobacter;s__Acinetobacter pittii	GCF_000369045.1	95	d__Bacteria;p__Pseudomonadota;c__Gammaproteobacteria;o__Pseudomonadales;f__Moraxellaceae;g__Acinetobacter;s__Acinetobacter pittii	97.6	0.935	GCF_000369045.1	95	d__Bacteria;p__Pseudomonadota;c__Gammaproteobacteria;o__Pseudomonadales;f__Moraxellaceae;g__Acinetobacter;s__Acinetobacter pittii	97.6	0.935	d__Bacteria;p__Pseudomonadota;c__Gammaproteobacteria;o__Pseudomonadales;f__Moraxellaceae;g__Acinetobacter;s__	taxonomic classification defined by topology and ANI	topological placement and ANI have congruent species assignments	GCF_013009345.1, s__Acinetobacter geminorum, 95.0, 94.84, 0.879; GCF_002928115.1, s__Acinetobacter pittii_H, 95.0, 94.59, 0.853; GCF_001605885.1, s__Acinetobacter lactucae, 95.0, 93.5, 0.847; GCF_013344765.1, s__Acinetobacter lactucae_A, 95.0, 93.34, 0.882; GCF_000399685.1, s__Acinetobacter pittii_E, 95.0, 92.63, 0.83; GCF_000196795.1, s__Acinetobacter oleivorans, 95.0, 91.56, 0.823; GCF_00031393…	97.12	11	N/A	N/A
500441-22-s-R9-Dorado-FAST-flye	d__Bacteria;p__Pseudomonadota;c__Gammaproteobacteria;o__Pseudomonadales;f__Moraxellaceae;g__Acinetobacter;s__Acinetobacter pittii	GCF_000369045.1	95	d__Bacteria;p__Pseudomonadota;c__Gammaproteobacteria;o__Pseudomonadales;f__Moraxellaceae;g__Acinetobacter;s__Acinetobacter pittii	97.27	0.92	GCF_000369045.1	95	d__Bacteria;p__Pseudomonadota;c__Gammaproteobacteria;o__Pseudomonadales;f__Moraxellaceae;g__Acinetobacter;s__Acinetobacter pittii	97.27	0.92	d__Bacteria;p__Pseudomonadota;c__Gammaproteobacteria;o__Pseudomonadales;f__Moraxellaceae;g__Acinetobacter;s__	taxonomic classification defined by topology and ANI	topological placement and ANI have congruent species assignments	GCF_013009345.1, s__Acinetobacter geminorum, 95.0, 94.59, 0.847; GCF_002928115.1, s__Acinetobacter pittii_H, 95.0, 94.39, 0.86; GCF_001605885.1, s__Acinetobacter lactucae, 95.0, 93.3, 0.864; GCF_013344765.1, s__Acinetobacter lactucae_A, 95.0, 92.98, 0.862; GCF_000399685.1, s__Acinetobacter pittii_E, 95.0, 92.37, 0.84; GCF_000196795.1, s__Acinetobacter oleivorans, 95.0, 91.33, 0.859; GCF_000313935…	73.25	11	N/A	N/A
500441-22-s-R9-Dorado-HAC	d__Bacteria;p__Pseudomonadota;c__Gammaproteobacteria;o__Pseudomonadales;f__Moraxellaceae;g__Acinetobacter;s__Acinetobacter pittii	GCF_000369045.1	95	d__Bacteria;p__Pseudomonadota;c__Gammaproteobacteria;o__Pseudomonadales;f__Moraxellaceae;g__Acinetobacter;s__Acinetobacter pittii	97.55	0.936	GCF_000369045.1	95	d__Bacteria;p__Pseudomonadota;c__Gammaproteobacteria;o__Pseudomonadales;f__Moraxellaceae;g__Acinetobacter;s__Acinetobacter pittii	97.55	0.936	d__Bacteria;p__Pseudomonadota;c__Gammaproteobacteria;o__Pseudomonadales;f__Moraxellaceae;g__Acinetobacter;s__	taxonomic classification defined by topology and ANI	topological placement and ANI have congruent species assignments	GCF_013009345.1, s__Acinetobacter geminorum, 95.0, 94.82, 0.876; GCF_002928115.1, s__Acinetobacter pittii_H, 95.0, 94.59, 0.856; GCF_001605885.1, s__Acinetobacter lactucae, 95.0, 93.47, 0.856; GCF_013344765.1, s__Acinetobacter lactucae_A, 95.0, 93.31, 0.886; GCF_000399685.1, s__Acinetobacter pittii_E, 95.0, 92.6, 0.84; GCF_000196795.1, s__Acinetobacter oleivorans, 95.0, 91.57, 0.834; GCF_00031393…	97.99	11	N/A	N/A
500441-22-s-R9-Dorado-HAC-flye	d__Bacteria;p__Pseudomonadota;c__Gammaproteobacteria;o__Pseudomonadales;f__Moraxellaceae;g__Acinetobacter;s__Acinetobacter pittii	GCF_000369045.1	95	d__Bacteria;p__Pseudomonadota;c__Gammaproteobacteria;o__Pseudomonadales;f__Moraxellaceae;g__Acinetobacter;s__Acinetobacter pittii	97.46	0.904	GCF_000369045.1	95	d__Bacteria;p__Pseudomonadota;c__Gammaproteobacteria;o__Pseudomonadales;f__Moraxellaceae;g__Acinetobacter;s__Acinetobacter pittii	97.46	0.904	d__Bacteria;p__Pseudomonadota;c__Gammaproteobacteria;o__Pseudomonadales;f__Moraxellaceae;g__Acinetobacter;s__	taxonomic classification defined by topology and ANI	topological placement and ANI have congruent species assignments	GCF_013009345.1, s__Acinetobacter geminorum, 95.0, 94.84, 0.844; GCF_002928115.1, s__Acinetobacter pittii_H, 95.0, 94.6, 0.847; GCF_001605885.1, s__Acinetobacter lactucae, 95.0, 93.46, 0.848; GCF_013344765.1, s__Acinetobacter lactucae_A, 95.0, 93.19, 0.874; GCF_000399685.1, s__Acinetobacter pittii_E, 95.0, 92.6, 0.816; GCF_000196795.1, s__Acinetobacter oleivorans, 95.0, 91.49, 0.844; GCF_00031393…	86.14	11	N/A	N/A
500441-22-s-R9-Dorado-SUP	d__Bacteria;p__Pseudomonadota;c__Gammaproteobacteria;o__Pseudomonadales;f__Moraxellaceae;g__Acinetobacter;s__Acinetobacter pittii	GCF_000369045.1	95	d__Bacteria;p__Pseudomonadota;c__Gammaproteobacteria;o__Pseudomonadales;f__Moraxellaceae;g__Acinetobacter;s__Acinetobacter pittii	97.59	0.931	GCF_000369045.1	95	d__Bacteria;p__Pseudomonadota;c__Gammaproteobacteria;o__Pseudomonadales;f__Moraxellaceae;g__Acinetobacter;s__Acinetobacter pittii	97.59	0.931	d__Bacteria;p__Pseudomonadota;c__Gammaproteobacteria;o__Pseudomonadales;f__Moraxellaceae;g__Acinetobacter;s__	taxonomic classification defined by topology and ANI	topological placement and ANI have congruent species assignments	GCF_013009345.1, s__Acinetobacter geminorum, 95.0, 94.85, 0.883; GCF_002928115.1, s__Acinetobacter pittii_H, 95.0, 94.57, 0.857; GCF_001605885.1, s__Acinetobacter lactucae, 95.0, 93.5, 0.851; GCF_013344765.1, s__Acinetobacter lactucae_A, 95.0, 93.31, 0.886; GCF_000399685.1, s__Acinetobacter pittii_E, 95.0, 92.65, 0.832; GCF_000196795.1, s__Acinetobacter oleivorans, 95.0, 91.54, 0.827; GCF_0003139…	98.01	11	N/A	N/A
500441-22-s-R9-Dorado-SUP-flye	d__Bacteria;p__Pseudomonadota;c__Gammaproteobacteria;o__Pseudomonadales;f__Moraxellaceae;g__Acinetobacter;s__Acinetobacter pittii	GCF_000369045.1	95	d__Bacteria;p__Pseudomonadota;c__Gammaproteobacteria;o__Pseudomonadales;f__Moraxellaceae;g__Acinetobacter;s__Acinetobacter pittii	97.54	0.891	GCF_000369045.1	95	d__Bacteria;p__Pseudomonadota;c__Gammaproteobacteria;o__Pseudomonadales;f__Moraxellaceae;g__Acinetobacter;s__Acinetobacter pittii	97.54	0.891	d__Bacteria;p__Pseudomonadota;c__Gammaproteobacteria;o__Pseudomonadales;f__Moraxellaceae;g__Acinetobacter;s__	taxonomic classification defined by topology and ANI	topological placement and ANI have congruent species assignments	GCF_013009345.1, s__Acinetobacter geminorum, 95.0, 94.79, 0.857; GCF_002928115.1, s__Acinetobacter pittii_H, 95.0, 94.63, 0.835; GCF_001605885.1, s__Acinetobacter lactucae, 95.0, 93.46, 0.844; GCF_013344765.1, s__Acinetobacter lactucae_A, 95.0, 93.23, 0.884; GCF_000399685.1, s__Acinetobacter pittii_E, 95.0, 92.61, 0.813; GCF_000196795.1, s__Acinetobacter oleivorans, 95.0, 91.53, 0.84; GCF_0003139…	88.36	11	N/A	N/A
500441-22-s-R9-Guppy-FAST	d__Bacteria;p__Pseudomonadota;c__Gammaproteobacteria;o__Pseudomonadales;f__Moraxellaceae;g__Acinetobacter;s__Acinetobacter pittii	GCF_000369045.1	95	d__Bacteria;p__Pseudomonadota;c__Gammaproteobacteria;o__Pseudomonadales;f__Moraxellaceae;g__Acinetobacter;s__Acinetobacter pittii	97.54	0.926	GCF_000369045.1	95	d__Bacteria;p__Pseudomonadota;c__Gammaproteobacteria;o__Pseudomonadales;f__Moraxellaceae;g__Acinetobacter;s__Acinetobacter pittii	97.54	0.926	d__Bacteria;p__Pseudomonadota;c__Gammaproteobacteria;o__Pseudomonadales;f__Moraxellaceae;g__Acinetobacter;s__	taxonomic classification defined by topology and ANI	topological placement and ANI have congruent species assignments	GCF_013009345.1, s__Acinetobacter geminorum, 95.0, 94.87, 0.872; GCF_002928115.1, s__Acinetobacter pittii_H, 95.0, 94.63, 0.853; GCF_001605885.1, s__Acinetobacter lactucae, 95.0, 93.51, 0.856; GCF_013344765.1, s__Acinetobacter lactucae_A, 95.0, 93.24, 0.897; GCF_000399685.1, s__Acinetobacter pittii_E, 95.0, 92.69, 0.836; GCF_000196795.1, s__Acinetobacter oleivorans, 95.0, 91.53, 0.834; GCF_000313…	96.66	11	N/A	N/A
500441-22-s-R9-Guppy-FAST-flye	d__Bacteria;p__Pseudomonadota;c__Gammaproteobacteria;o__Pseudomonadales;f__Moraxellaceae;g__Acinetobacter;s__Acinetobacter pittii	GCF_000369045.1	95	d__Bacteria;p__Pseudomonadota;c__Gammaproteobacteria;o__Pseudomonadales;f__Moraxellaceae;g__Acinetobacter;s__Acinetobacter pittii	97.24	0.901	GCF_000369045.1	95	d__Bacteria;p__Pseudomonadota;c__Gammaproteobacteria;o__Pseudomonadales;f__Moraxellaceae;g__Acinetobacter;s__Acinetobacter pittii	97.24	0.901	d__Bacteria;p__Pseudomonadota;c__Gammaproteobacteria;o__Pseudomonadales;f__Moraxellaceae;g__Acinetobacter;s__	taxonomic classification defined by topology and ANI	topological placement and ANI have congruent species assignments	GCF_013009345.1, s__Acinetobacter geminorum, 95.0, 94.59, 0.838; GCF_002928115.1, s__Acinetobacter pittii_H, 95.0, 94.44, 0.844; GCF_001605885.1, s__Acinetobacter lactucae, 95.0, 93.3, 0.843; GCF_013344765.1, s__Acinetobacter lactucae_A, 95.0, 92.97, 0.847; GCF_000399685.1, s__Acinetobacter pittii_E, 95.0, 92.45, 0.815; GCF_000196795.1, s__Acinetobacter oleivorans, 95.0, 91.46, 0.842; GCF_0003139…	68.84	11	N/A	N/A
500441-22-s-R9-Guppy-HAC	d__Bacteria;p__Pseudomonadota;c__Gammaproteobacteria;o__Pseudomonadales;f__Moraxellaceae;g__Acinetobacter;s__Acinetobacter pittii	GCF_000369045.1	95	d__Bacteria;p__Pseudomonadota;c__Gammaproteobacteria;o__Pseudomonadales;f__Moraxellaceae;g__Acinetobacter;s__Acinetobacter pittii	97.58	0.926	GCF_000369045.1	95	d__Bacteria;p__Pseudomonadota;c__Gammaproteobacteria;o__Pseudomonadales;f__Moraxellaceae;g__Acinetobacter;s__Acinetobacter pittii	97.58	0.926	d__Bacteria;p__Pseudomonadota;c__Gammaproteobacteria;o__Pseudomonadales;f__Moraxellaceae;g__Acinetobacter;s__	taxonomic classification defined by topology and ANI	topological placement and ANI have congruent species assignments	GCF_013009345.1, s__Acinetobacter geminorum, 95.0, 94.89, 0.878; GCF_002928115.1, s__Acinetobacter pittii_H, 95.0, 94.61, 0.851; GCF_001605885.1, s__Acinetobacter lactucae, 95.0, 93.45, 0.861; GCF_013344765.1, s__Acinetobacter lactucae_A, 95.0, 93.31, 0.892; GCF_000399685.1, s__Acinetobacter pittii_E, 95.0, 92.61, 0.837; GCF_000196795.1, s__Acinetobacter oleivorans, 95.0, 91.51, 0.845; GCF_000313…	98.01	11	N/A	N/A
500441-22-s-R9-Guppy-HAC-flye	d__Bacteria;p__Pseudomonadota;c__Gammaproteobacteria;o__Pseudomonadales;f__Moraxellaceae;g__Acinetobacter;s__Acinetobacter pittii	GCF_000369045.1	95	d__Bacteria;p__Pseudomonadota;c__Gammaproteobacteria;o__Pseudomonadales;f__Moraxellaceae;g__Acinetobacter;s__Acinetobacter pittii	97.5	0.889	GCF_000369045.1	95	d__Bacteria;p__Pseudomonadota;c__Gammaproteobacteria;o__Pseudomonadales;f__Moraxellaceae;g__Acinetobacter;s__Acinetobacter pittii	97.5	0.889	d__Bacteria;p__Pseudomonadota;c__Gammaproteobacteria;o__Pseudomonadales;f__Moraxellaceae;g__Acinetobacter;s__	taxonomic classification defined by topology and ANI	topological placement and ANI have congruent species assignments	GCF_013009345.1, s__Acinetobacter geminorum, 95.0, 94.81, 0.832; GCF_002928115.1, s__Acinetobacter pittii_H, 95.0, 94.66, 0.835; GCF_001605885.1, s__Acinetobacter lactucae, 95.0, 93.53, 0.83; GCF_013344765.1, s__Acinetobacter lactucae_A, 95.0, 93.26, 0.869; GCF_000399685.1, s__Acinetobacter pittii_E, 95.0, 92.59, 0.814; GCF_000196795.1, s__Acinetobacter oleivorans, 95.0, 91.62, 0.829; GCF_0003139…	89.59	11	N/A	N/A
500441-22-s-R9-Guppy-SUP	d__Bacteria;p__Pseudomonadota;c__Gammaproteobacteria;o__Pseudomonadales;f__Moraxellaceae;g__Acinetobacter;s__Acinetobacter pittii	GCF_000369045.1	95	d__Bacteria;p__Pseudomonadota;c__Gammaproteobacteria;o__Pseudomonadales;f__Moraxellaceae;g__Acinetobacter;s__Acinetobacter pittii	97.55	0.932	GCF_000369045.1	95	d__Bacteria;p__Pseudomonadota;c__Gammaproteobacteria;o__Pseudomonadales;f__Moraxellaceae;g__Acinetobacter;s__Acinetobacter pittii	97.55	0.932	d__Bacteria;p__Pseudomonadota;c__Gammaproteobacteria;o__Pseudomonadales;f__Moraxellaceae;g__Acinetobacter;s__	taxonomic classification defined by topology and ANI	topological placement and ANI have congruent species assignments	GCF_013009345.1, s__Acinetobacter geminorum, 95.0, 94.89, 0.88; GCF_002928115.1, s__Acinetobacter pittii_H, 95.0, 94.57, 0.852; GCF_001605885.1, s__Acinetobacter lactucae, 95.0, 93.51, 0.858; GCF_013344765.1, s__Acinetobacter lactucae_A, 95.0, 93.26, 0.895; GCF_000399685.1, s__Acinetobacter pittii_E, 95.0, 92.67, 0.835; GCF_000196795.1, s__Acinetobacter oleivorans, 95.0, 91.52, 0.829; GCF_0003139…	98.01	11	N/A	N/A
500441-22-s-R9-Guppy-SUP-flye	d__Bacteria;p__Pseudomonadota;c__Gammaproteobacteria;o__Pseudomonadales;f__Moraxellaceae;g__Acinetobacter;s__Acinetobacter pittii	GCF_000369045.1	95	d__Bacteria;p__Pseudomonadota;c__Gammaproteobacteria;o__Pseudomonadales;f__Moraxellaceae;g__Acinetobacter;s__Acinetobacter pittii	97.57	0.889	GCF_000369045.1	95	d__Bacteria;p__Pseudomonadota;c__Gammaproteobacteria;o__Pseudomonadales;f__Moraxellaceae;g__Acinetobacter;s__Acinetobacter pittii	97.57	0.889	d__Bacteria;p__Pseudomonadota;c__Gammaproteobacteria;o__Pseudomonadales;f__Moraxellaceae;g__Acinetobacter;s__	taxonomic classification defined by topology and ANI	topological placement and ANI have congruent species assignments	GCF_013009345.1, s__Acinetobacter geminorum, 95.0, 94.95, 0.83; GCF_002928115.1, s__Acinetobacter pittii_H, 95.0, 94.65, 0.843; GCF_001605885.1, s__Acinetobacter lactucae, 95.0, 93.57, 0.843; GCF_013344765.1, s__Acinetobacter lactucae_A, 95.0, 93.29, 0.872; GCF_000399685.1, s__Acinetobacter pittii_E, 95.0, 92.67, 0.822; GCF_000196795.1, s__Acinetobacter oleivorans, 95.0, 91.63, 0.846; GCF_0003139…	93.03	11	N/A	N/A
500441-22-s-illumina	d__Bacteria;p__Pseudomonadota;c__Gammaproteobacteria;o__Pseudomonadales;f__Moraxellaceae;g__Acinetobacter;s__Acinetobacter pittii	GCF_000369045.1	95	d__Bacteria;p__Pseudomonadota;c__Gammaproteobacteria;o__Pseudomonadales;f__Moraxellaceae;g__Acinetobacter;s__Acinetobacter pittii	97.58	0.909	GCF_000369045.1	95	d__Bacteria;p__Pseudomonadota;c__Gammaproteobacteria;o__Pseudomonadales;f__Moraxellaceae;g__Acinetobacter;s__Acinetobacter pittii	97.58	0.909	d__Bacteria;p__Pseudomonadota;c__Gammaproteobacteria;o__Pseudomonadales;f__Moraxellaceae;g__Acinetobacter;s__	taxonomic classification defined by topology and ANI	topological placement and ANI have congruent species assignments	GCF_013009345.1, s__Acinetobacter geminorum, 95.0, 94.87, 0.859; GCF_002928115.1, s__Acinetobacter pittii_H, 95.0, 94.65, 0.848; GCF_001605885.1, s__Acinetobacter lactucae, 95.0, 93.52, 0.862; GCF_013344765.1, s__Acinetobacter lactucae_A, 95.0, 93.29, 0.881; GCF_000399685.1, s__Acinetobacter pittii_E, 95.0, 92.74, 0.828; GCF_000196795.1, s__Acinetobacter oleivorans, 95.0, 91.56, 0.851; GCF_000313…	98.01	11	N/A	N/A
500441-22-s-lrp-R10-Dorado-FAST	d__Bacteria;p__Pseudomonadota;c__Gammaproteobacteria;o__Pseudomonadales;f__Moraxellaceae;g__Acinetobacter;s__Acinetobacter pittii	GCF_000369045.1	95	d__Bacteria;p__Pseudomonadota;c__Gammaproteobacteria;o__Pseudomonadales;f__Moraxellaceae;g__Acinetobacter;s__Acinetobacter pittii	97.58	0.93	GCF_000369045.1	95	d__Bacteria;p__Pseudomonadota;c__Gammaproteobacteria;o__Pseudomonadales;f__Moraxellaceae;g__Acinetobacter;s__Acinetobacter pittii	97.58	0.93	d__Bacteria;p__Pseudomonadota;c__Gammaproteobacteria;o__Pseudomonadales;f__Moraxellaceae;g__Acinetobacter;s__	taxonomic classification defined by topology and ANI	topological placement and ANI have congruent species assignments	GCF_013009345.1, s__Acinetobacter geminorum, 95.0, 94.87, 0.88; GCF_002928115.1, s__Acinetobacter pittii_H, 95.0, 94.59, 0.853; GCF_001605885.1, s__Acinetobacter lactucae, 95.0, 93.51, 0.855; GCF_013344765.1, s__Acinetobacter lactucae_A, 95.0, 93.25, 0.896; GCF_000399685.1, s__Acinetobacter pittii_E, 95.0, 92.67, 0.832; GCF_000196795.1, s__Acinetobacter oleivorans, 95.0, 91.62, 0.825; GCF_0003139…	98.01	11	N/A	N/A
500441-22-s-lrp-R10-Dorado-HAC	d__Bacteria;p__Pseudomonadota;c__Gammaproteobacteria;o__Pseudomonadales;f__Moraxellaceae;g__Acinetobacter;s__Acinetobacter pittii	GCF_000369045.1	95	d__Bacteria;p__Pseudomonadota;c__Gammaproteobacteria;o__Pseudomonadales;f__Moraxellaceae;g__Acinetobacter;s__Acinetobacter pittii	97.56	0.927	GCF_000369045.1	95	d__Bacteria;p__Pseudomonadota;c__Gammaproteobacteria;o__Pseudomonadales;f__Moraxellaceae;g__Acinetobacter;s__Acinetobacter pittii	97.56	0.927	d__Bacteria;p__Pseudomonadota;c__Gammaproteobacteria;o__Pseudomonadales;f__Moraxellaceae;g__Acinetobacter;s__	taxonomic classification defined by topology and ANI	topological placement and ANI have congruent species assignments	GCF_013009345.1, s__Acinetobacter geminorum, 95.0, 94.86, 0.88; GCF_002928115.1, s__Acinetobacter pittii_H, 95.0, 94.57, 0.855; GCF_001605885.1, s__Acinetobacter lactucae, 95.0, 93.44, 0.858; GCF_013344765.1, s__Acinetobacter lactucae_A, 95.0, 93.25, 0.894; GCF_000399685.1, s__Acinetobacter pittii_E, 95.0, 92.67, 0.834; GCF_000196795.1, s__Acinetobacter oleivorans, 95.0, 91.61, 0.823; GCF_0003139…	98.01	11	N/A	N/A
500441-22-s-lrp-R10-Dorado-SUP	d__Bacteria;p__Pseudomonadota;c__Gammaproteobacteria;o__Pseudomonadales;f__Moraxellaceae;g__Acinetobacter;s__Acinetobacter pittii	GCF_000369045.1	95	d__Bacteria;p__Pseudomonadota;c__Gammaproteobacteria;o__Pseudomonadales;f__Moraxellaceae;g__Acinetobacter;s__Acinetobacter pittii	97.56	0.927	GCF_000369045.1	95	d__Bacteria;p__Pseudomonadota;c__Gammaproteobacteria;o__Pseudomonadales;f__Moraxellaceae;g__Acinetobacter;s__Acinetobacter pittii	97.56	0.927	d__Bacteria;p__Pseudomonadota;c__Gammaproteobacteria;o__Pseudomonadales;f__Moraxellaceae;g__Acinetobacter;s__	taxonomic classification defined by topology and ANI	topological placement and ANI have congruent species assignments	GCF_013009345.1, s__Acinetobacter geminorum, 95.0, 94.86, 0.88; GCF_002928115.1, s__Acinetobacter pittii_H, 95.0, 94.57, 0.855; GCF_001605885.1, s__Acinetobacter lactucae, 95.0, 93.44, 0.858; GCF_013344765.1, s__Acinetobacter lactucae_A, 95.0, 93.25, 0.894; GCF_000399685.1, s__Acinetobacter pittii_E, 95.0, 92.67, 0.834; GCF_000196795.1, s__Acinetobacter oleivorans, 95.0, 91.61, 0.823; GCF_0003139…	98.01	11	N/A	N/A
500441-22-s-lrp-R10-Guppy-FAST	d__Bacteria;p__Pseudomonadota;c__Gammaproteobacteria;o__Pseudomonadales;f__Moraxellaceae;g__Acinetobacter;s__Acinetobacter pittii	GCF_000369045.1	95	d__Bacteria;p__Pseudomonadota;c__Gammaproteobacteria;o__Pseudomonadales;f__Moraxellaceae;g__Acinetobacter;s__Acinetobacter pittii	97.56	0.928	GCF_000369045.1	95	d__Bacteria;p__Pseudomonadota;c__Gammaproteobacteria;o__Pseudomonadales;f__Moraxellaceae;g__Acinetobacter;s__Acinetobacter pittii	97.56	0.928	d__Bacteria;p__Pseudomonadota;c__Gammaproteobacteria;o__Pseudomonadales;f__Moraxellaceae;g__Acinetobacter;s__	taxonomic classification defined by topology and ANI	topological placement and ANI have congruent species assignments	GCF_013009345.1, s__Acinetobacter geminorum, 95.0, 94.87, 0.88; GCF_002928115.1, s__Acinetobacter pittii_H, 95.0, 94.59, 0.858; GCF_001605885.1, s__Acinetobacter lactucae, 95.0, 93.43, 0.859; GCF_013344765.1, s__Acinetobacter lactucae_A, 95.0, 93.23, 0.897; GCF_000399685.1, s__Acinetobacter pittii_E, 95.0, 92.68, 0.832; GCF_000196795.1, s__Acinetobacter oleivorans, 95.0, 91.6, 0.824; GCF_00031393…	98.01	11	N/A	N/A
500441-22-s-lrp-R10-Guppy-HAC	d__Bacteria;p__Pseudomonadota;c__Gammaproteobacteria;o__Pseudomonadales;f__Moraxellaceae;g__Acinetobacter;s__Acinetobacter pittii	GCF_000369045.1	95	d__Bacteria;p__Pseudomonadota;c__Gammaproteobacteria;o__Pseudomonadales;f__Moraxellaceae;g__Acinetobacter;s__Acinetobacter pittii	97.58	0.93	GCF_000369045.1	95	d__Bacteria;p__Pseudomonadota;c__Gammaproteobacteria;o__Pseudomonadales;f__Moraxellaceae;g__Acinetobacter;s__Acinetobacter pittii	97.58	0.93	d__Bacteria;p__Pseudomonadota;c__Gammaproteobacteria;o__Pseudomonadales;f__Moraxellaceae;g__Acinetobacter;s__	taxonomic classification defined by topology and ANI	topological placement and ANI have congruent species assignments	GCF_013009345.1, s__Acinetobacter geminorum, 95.0, 94.87, 0.88; GCF_002928115.1, s__Acinetobacter pittii_H, 95.0, 94.59, 0.853; GCF_001605885.1, s__Acinetobacter lactucae, 95.0, 93.51, 0.855; GCF_013344765.1, s__Acinetobacter lactucae_A, 95.0, 93.25, 0.896; GCF_000399685.1, s__Acinetobacter pittii_E, 95.0, 92.67, 0.832; GCF_000196795.1, s__Acinetobacter oleivorans, 95.0, 91.62, 0.825; GCF_0003139…	98.01	11	N/A	N/A
500441-22-s-lrp-R10-Guppy-SUP	d__Bacteria;p__Pseudomonadota;c__Gammaproteobacteria;o__Pseudomonadales;f__Moraxellaceae;g__Acinetobacter;s__Acinetobacter pittii	GCF_000369045.1	95	d__Bacteria;p__Pseudomonadota;c__Gammaproteobacteria;o__Pseudomonadales;f__Moraxellaceae;g__Acinetobacter;s__Acinetobacter pittii	97.56	0.927	GCF_000369045.1	95	d__Bacteria;p__Pseudomonadota;c__Gammaproteobacteria;o__Pseudomonadales;f__Moraxellaceae;g__Acinetobacter;s__Acinetobacter pittii	97.56	0.927	d__Bacteria;p__Pseudomonadota;c__Gammaproteobacteria;o__Pseudomonadales;f__Moraxellaceae;g__Acinetobacter;s__	taxonomic classification defined by topology and ANI	topological placement and ANI have congruent species assignments	GCF_013009345.1, s__Acinetobacter geminorum, 95.0, 94.86, 0.88; GCF_002928115.1, s__Acinetobacter pittii_H, 95.0, 94.57, 0.855; GCF_001605885.1, s__Acinetobacter lactucae, 95.0, 93.44, 0.858; GCF_013344765.1, s__Acinetobacter lactucae_A, 95.0, 93.25, 0.894; GCF_000399685.1, s__Acinetobacter pittii_E, 95.0, 92.67, 0.834; GCF_000196795.1, s__Acinetobacter oleivorans, 95.0, 91.61, 0.823; GCF_0003139…	98.01	11	N/A	N/A
500441-22-s-lrp-R10-Rerio-SUP	d__Bacteria;p__Pseudomonadota;c__Gammaproteobacteria;o__Pseudomonadales;f__Moraxellaceae;g__Acinetobacter;s__Acinetobacter pittii	GCF_000369045.1	95	d__Bacteria;p__Pseudomonadota;c__Gammaproteobacteria;o__Pseudomonadales;f__Moraxellaceae;g__Acinetobacter;s__Acinetobacter pittii	97.63	0.928	GCF_000369045.1	95	d__Bacteria;p__Pseudomonadota;c__Gammaproteobacteria;o__Pseudomonadales;f__Moraxellaceae;g__Acinetobacter;s__Acinetobacter pittii	97.63	0.928	d__Bacteria;p__Pseudomonadota;c__Gammaproteobacteria;o__Pseudomonadales;f__Moraxellaceae;g__Acinetobacter;s__	taxonomic classification defined by topology and ANI	topological placement and ANI have congruent species assignments	GCF_013009345.1, s__Acinetobacter geminorum, 95.0, 94.9, 0.866; GCF_002928115.1, s__Acinetobacter pittii_H, 95.0, 94.62, 0.85; GCF_001605885.1, s__Acinetobacter lactucae, 95.0, 93.45, 0.86; GCF_013344765.1, s__Acinetobacter lactucae_A, 95.0, 93.31, 0.891; GCF_000399685.1, s__Acinetobacter pittii_E, 95.0, 92.64, 0.836; GCF_000196795.1, s__Acinetobacter oleivorans, 95.0, 91.52, 0.837; GCF_000313935…	98.01	11	N/A	N/A
500441-22-s-lrp-R9-Dorado-FAST	d__Bacteria;p__Pseudomonadota;c__Gammaproteobacteria;o__Pseudomonadales;f__Moraxellaceae;g__Acinetobacter;s__Acinetobacter pittii	GCF_000369045.1	95	d__Bacteria;p__Pseudomonadota;c__Gammaproteobacteria;o__Pseudomonadales;f__Moraxellaceae;g__Acinetobacter;s__Acinetobacter pittii	97.56	0.927	GCF_000369045.1	95	d__Bacteria;p__Pseudomonadota;c__Gammaproteobacteria;o__Pseudomonadales;f__Moraxellaceae;g__Acinetobacter;s__Acinetobacter pittii	97.56	0.927	d__Bacteria;p__Pseudomonadota;c__Gammaproteobacteria;o__Pseudomonadales;f__Moraxellaceae;g__Acinetobacter;s__	taxonomic classification defined by topology and ANI	topological placement and ANI have congruent species assignments	GCF_013009345.1, s__Acinetobacter geminorum, 95.0, 94.86, 0.88; GCF_002928115.1, s__Acinetobacter pittii_H, 95.0, 94.57, 0.855; GCF_001605885.1, s__Acinetobacter lactucae, 95.0, 93.44, 0.858; GCF_013344765.1, s__Acinetobacter lactucae_A, 95.0, 93.25, 0.894; GCF_000399685.1, s__Acinetobacter pittii_E, 95.0, 92.67, 0.834; GCF_000196795.1, s__Acinetobacter oleivorans, 95.0, 91.61, 0.823; GCF_0003139…	98.01	11	N/A	N/A
500441-22-s-lrp-R9-Dorado-HAC	d__Bacteria;p__Pseudomonadota;c__Gammaproteobacteria;o__Pseudomonadales;f__Moraxellaceae;g__Acinetobacter;s__Acinetobacter pittii	GCF_000369045.1	95	d__Bacteria;p__Pseudomonadota;c__Gammaproteobacteria;o__Pseudomonadales;f__Moraxellaceae;g__Acinetobacter;s__Acinetobacter pittii	97.56	0.927	GCF_000369045.1	95	d__Bacteria;p__Pseudomonadota;c__Gammaproteobacteria;o__Pseudomonadales;f__Moraxellaceae;g__Acinetobacter;s__Acinetobacter pittii	97.56	0.927	d__Bacteria;p__Pseudomonadota;c__Gammaproteobacteria;o__Pseudomonadales;f__Moraxellaceae;g__Acinetobacter;s__	taxonomic classification defined by topology and ANI	topological placement and ANI have congruent species assignments	GCF_013009345.1, s__Acinetobacter geminorum, 95.0, 94.86, 0.88; GCF_002928115.1, s__Acinetobacter pittii_H, 95.0, 94.57, 0.855; GCF_001605885.1, s__Acinetobacter lactucae, 95.0, 93.44, 0.858; GCF_013344765.1, s__Acinetobacter lactucae_A, 95.0, 93.25, 0.894; GCF_000399685.1, s__Acinetobacter pittii_E, 95.0, 92.67, 0.834; GCF_000196795.1, s__Acinetobacter oleivorans, 95.0, 91.61, 0.823; GCF_0003139…	98.01	11	N/A	N/A
500441-22-s-lrp-R9-Dorado-SUP	d__Bacteria;p__Pseudomonadota;c__Gammaproteobacteria;o__Pseudomonadales;f__Moraxellaceae;g__Acinetobacter;s__Acinetobacter pittii	GCF_000369045.1	95	d__Bacteria;p__Pseudomonadota;c__Gammaproteobacteria;o__Pseudomonadales;f__Moraxellaceae;g__Acinetobacter;s__Acinetobacter pittii	97.56	0.927	GCF_000369045.1	95	d__Bacteria;p__Pseudomonadota;c__Gammaproteobacteria;o__Pseudomonadales;f__Moraxellaceae;g__Acinetobacter;s__Acinetobacter pittii	97.56	0.927	d__Bacteria;p__Pseudomonadota;c__Gammaproteobacteria;o__Pseudomonadales;f__Moraxellaceae;g__Acinetobacter;s__	taxonomic classification defined by topology and ANI	topological placement and ANI have congruent species assignments	GCF_013009345.1, s__Acinetobacter geminorum, 95.0, 94.86, 0.88; GCF_002928115.1, s__Acinetobacter pittii_H, 95.0, 94.57, 0.855; GCF_001605885.1, s__Acinetobacter lactucae, 95.0, 93.44, 0.858; GCF_013344765.1, s__Acinetobacter lactucae_A, 95.0, 93.25, 0.894; GCF_000399685.1, s__Acinetobacter pittii_E, 95.0, 92.67, 0.834; GCF_000196795.1, s__Acinetobacter oleivorans, 95.0, 91.61, 0.823; GCF_0003139…	98.01	11	N/A	N/A
500441-22-s-lrp-R9-Guppy-FAST	d__Bacteria;p__Pseudomonadota;c__Gammaproteobacteria;o__Pseudomonadales;f__Moraxellaceae;g__Acinetobacter;s__Acinetobacter pittii	GCF_000369045.1	95	d__Bacteria;p__Pseudomonadota;c__Gammaproteobacteria;o__Pseudomonadales;f__Moraxellaceae;g__Acinetobacter;s__Acinetobacter pittii	97.54	0.934	GCF_000369045.1	95	d__Bacteria;p__Pseudomonadota;c__Gammaproteobacteria;o__Pseudomonadales;f__Moraxellaceae;g__Acinetobacter;s__Acinetobacter pittii	97.54	0.934	d__Bacteria;p__Pseudomonadota;c__Gammaproteobacteria;o__Pseudomonadales;f__Moraxellaceae;g__Acinetobacter;s__	taxonomic classification defined by topology and ANI	topological placement and ANI have congruent species assignments	GCF_013009345.1, s__Acinetobacter geminorum, 95.0, 94.91, 0.873; GCF_002928115.1, s__Acinetobacter pittii_H, 95.0, 94.6, 0.855; GCF_001605885.1, s__Acinetobacter lactucae, 95.0, 93.45, 0.859; GCF_013344765.1, s__Acinetobacter lactucae_A, 95.0, 93.27, 0.893; GCF_000399685.1, s__Acinetobacter pittii_E, 95.0, 92.63, 0.834; GCF_000196795.1, s__Acinetobacter oleivorans, 95.0, 91.54, 0.827; GCF_0003139…	98.01	11	N/A	N/A
500441-22-s-lrp-R9-Guppy-HAC	d__Bacteria;p__Pseudomonadota;c__Gammaproteobacteria;o__Pseudomonadales;f__Moraxellaceae;g__Acinetobacter;s__Acinetobacter pittii	GCF_000369045.1	95	d__Bacteria;p__Pseudomonadota;c__Gammaproteobacteria;o__Pseudomonadales;f__Moraxellaceae;g__Acinetobacter;s__Acinetobacter pittii	97.56	0.927	GCF_000369045.1	95	d__Bacteria;p__Pseudomonadota;c__Gammaproteobacteria;o__Pseudomonadales;f__Moraxellaceae;g__Acinetobacter;s__Acinetobacter pittii	97.56	0.927	d__Bacteria;p__Pseudomonadota;c__Gammaproteobacteria;o__Pseudomonadales;f__Moraxellaceae;g__Acinetobacter;s__	taxonomic classification defined by topology and ANI	topological placement and ANI have congruent species assignments	GCF_013009345.1, s__Acinetobacter geminorum, 95.0, 94.86, 0.88; GCF_002928115.1, s__Acinetobacter pittii_H, 95.0, 94.57, 0.855; GCF_001605885.1, s__Acinetobacter lactucae, 95.0, 93.44, 0.858; GCF_013344765.1, s__Acinetobacter lactucae_A, 95.0, 93.25, 0.894; GCF_000399685.1, s__Acinetobacter pittii_E, 95.0, 92.67, 0.834; GCF_000196795.1, s__Acinetobacter oleivorans, 95.0, 91.61, 0.823; GCF_0003139…	98.01	11	N/A	N/A
500441-22-s-lrp-R9-Guppy-SUP	d__Bacteria;p__Pseudomonadota;c__Gammaproteobacteria;o__Pseudomonadales;f__Moraxellaceae;g__Acinetobacter;s__Acinetobacter pittii	GCF_000369045.1	95	d__Bacteria;p__Pseudomonadota;c__Gammaproteobacteria;o__Pseudomonadales;f__Moraxellaceae;g__Acinetobacter;s__Acinetobacter pittii	97.56	0.93	GCF_000369045.1	95	d__Bacteria;p__Pseudomonadota;c__Gammaproteobacteria;o__Pseudomonadales;f__Moraxellaceae;g__Acinetobacter;s__Acinetobacter pittii	97.56	0.93	d__Bacteria;p__Pseudomonadota;c__Gammaproteobacteria;o__Pseudomonadales;f__Moraxellaceae;g__Acinetobacter;s__	taxonomic classification defined by topology and ANI	topological placement and ANI have congruent species assignments	GCF_013009345.1, s__Acinetobacter geminorum, 95.0, 94.89, 0.871; GCF_002928115.1, s__Acinetobacter pittii_H, 95.0, 94.61, 0.857; GCF_001605885.1, s__Acinetobacter lactucae, 95.0, 93.45, 0.865; GCF_013344765.1, s__Acinetobacter lactucae_A, 95.0, 93.22, 0.895; GCF_000399685.1, s__Acinetobacter pittii_E, 95.0, 92.65, 0.833; GCF_000196795.1, s__Acinetobacter oleivorans, 95.0, 91.56, 0.822; GCF_000313…	98.01	11	N/A	N/A
500441-22-s-srp-R10-Dorado-FAST	d__Bacteria;p__Pseudomonadota;c__Gammaproteobacteria;o__Pseudomonadales;f__Moraxellaceae;g__Acinetobacter;s__Acinetobacter pittii	GCF_000369045.1	95	d__Bacteria;p__Pseudomonadota;c__Gammaproteobacteria;o__Pseudomonadales;f__Moraxellaceae;g__Acinetobacter;s__Acinetobacter pittii	97.57	0.928	GCF_000369045.1	95	d__Bacteria;p__Pseudomonadota;c__Gammaproteobacteria;o__Pseudomonadales;f__Moraxellaceae;g__Acinetobacter;s__Acinetobacter pittii	97.57	0.928	d__Bacteria;p__Pseudomonadota;c__Gammaproteobacteria;o__Pseudomonadales;f__Moraxellaceae;g__Acinetobacter;s__	taxonomic classification defined by topology and ANI	topological placement and ANI have congruent species assignments	GCF_013009345.1, s__Acinetobacter geminorum, 95.0, 94.84, 0.893; GCF_002928115.1, s__Acinetobacter pittii_H, 95.0, 94.56, 0.858; GCF_001605885.1, s__Acinetobacter lactucae, 95.0, 93.45, 0.859; GCF_013344765.1, s__Acinetobacter lactucae_A, 95.0, 93.28, 0.895; GCF_000399685.1, s__Acinetobacter pittii_E, 95.0, 92.63, 0.836; GCF_000196795.1, s__Acinetobacter oleivorans, 95.0, 91.53, 0.824; GCF_000313…	98.01	11	N/A	N/A
500441-22-s-srp-R10-Dorado-HAC	d__Bacteria;p__Pseudomonadota;c__Gammaproteobacteria;o__Pseudomonadales;f__Moraxellaceae;g__Acinetobacter;s__Acinetobacter pittii	GCF_000369045.1	95	d__Bacteria;p__Pseudomonadota;c__Gammaproteobacteria;o__Pseudomonadales;f__Moraxellaceae;g__Acinetobacter;s__Acinetobacter pittii	97.55	0.934	GCF_000369045.1	95	d__Bacteria;p__Pseudomonadota;c__Gammaproteobacteria;o__Pseudomonadales;f__Moraxellaceae;g__Acinetobacter;s__Acinetobacter pittii	97.55	0.934	d__Bacteria;p__Pseudomonadota;c__Gammaproteobacteria;o__Pseudomonadales;f__Moraxellaceae;g__Acinetobacter;s__	taxonomic classification defined by topology and ANI	topological placement and ANI have congruent species assignments	GCF_013009345.1, s__Acinetobacter geminorum, 95.0, 94.79, 0.882; GCF_002928115.1, s__Acinetobacter pittii_H, 95.0, 94.56, 0.856; GCF_001605885.1, s__Acinetobacter lactucae, 95.0, 93.46, 0.86; GCF_013344765.1, s__Acinetobacter lactucae_A, 95.0, 93.24, 0.893; GCF_000399685.1, s__Acinetobacter pittii_E, 95.0, 92.67, 0.836; GCF_000196795.1, s__Acinetobacter oleivorans, 95.0, 91.46, 0.829; GCF_0003139…	98.01	11	N/A	N/A
500441-22-s-srp-R10-Dorado-SUP	d__Bacteria;p__Pseudomonadota;c__Gammaproteobacteria;o__Pseudomonadales;f__Moraxellaceae;g__Acinetobacter;s__Acinetobacter pittii	GCF_000369045.1	95	d__Bacteria;p__Pseudomonadota;c__Gammaproteobacteria;o__Pseudomonadales;f__Moraxellaceae;g__Acinetobacter;s__Acinetobacter pittii	97.54	0.929	GCF_000369045.1	95	d__Bacteria;p__Pseudomonadota;c__Gammaproteobacteria;o__Pseudomonadales;f__Moraxellaceae;g__Acinetobacter;s__Acinetobacter pittii	97.54	0.929	d__Bacteria;p__Pseudomonadota;c__Gammaproteobacteria;o__Pseudomonadales;f__Moraxellaceae;g__Acinetobacter;s__	taxonomic classification defined by topology and ANI	topological placement and ANI have congruent species assignments	GCF_013009345.1, s__Acinetobacter geminorum, 95.0, 94.9, 0.869; GCF_002928115.1, s__Acinetobacter pittii_H, 95.0, 94.64, 0.852; GCF_001605885.1, s__Acinetobacter lactucae, 95.0, 93.47, 0.852; GCF_013344765.1, s__Acinetobacter lactucae_A, 95.0, 93.28, 0.893; GCF_000399685.1, s__Acinetobacter pittii_E, 95.0, 92.69, 0.831; GCF_000196795.1, s__Acinetobacter oleivorans, 95.0, 91.52, 0.823; GCF_0003139…	98.01	11	N/A	N/A
500441-22-s-srp-R10-Guppy-FAST	d__Bacteria;p__Pseudomonadota;c__Gammaproteobacteria;o__Pseudomonadales;f__Moraxellaceae;g__Acinetobacter;s__Acinetobacter pittii	GCF_000369045.1	95	d__Bacteria;p__Pseudomonadota;c__Gammaproteobacteria;o__Pseudomonadales;f__Moraxellaceae;g__Acinetobacter;s__Acinetobacter pittii	97.58	0.936	GCF_000369045.1	95	d__Bacteria;p__Pseudomonadota;c__Gammaproteobacteria;o__Pseudomonadales;f__Moraxellaceae;g__Acinetobacter;s__Acinetobacter pittii	97.58	0.936	d__Bacteria;p__Pseudomonadota;c__Gammaproteobacteria;o__Pseudomonadales;f__Moraxellaceae;g__Acinetobacter;s__	taxonomic classification defined by topology and ANI	topological placement and ANI have congruent species assignments	GCF_013009345.1, s__Acinetobacter geminorum, 95.0, 94.84, 0.876; GCF_002928115.1, s__Acinetobacter pittii_H, 95.0, 94.63, 0.859; GCF_001605885.1, s__Acinetobacter lactucae, 95.0, 93.49, 0.861; GCF_013344765.1, s__Acinetobacter lactucae_A, 95.0, 93.27, 0.891; GCF_000399685.1, s__Acinetobacter pittii_E, 95.0, 92.62, 0.837; GCF_000196795.1, s__Acinetobacter oleivorans, 95.0, 91.5, 0.83; GCF_00031393…	98.01	11	N/A	N/A
500441-22-s-srp-R10-Guppy-HAC	d__Bacteria;p__Pseudomonadota;c__Gammaproteobacteria;o__Pseudomonadales;f__Moraxellaceae;g__Acinetobacter;s__Acinetobacter pittii	GCF_000369045.1	95	d__Bacteria;p__Pseudomonadota;c__Gammaproteobacteria;o__Pseudomonadales;f__Moraxellaceae;g__Acinetobacter;s__Acinetobacter pittii	97.57	0.931	GCF_000369045.1	95	d__Bacteria;p__Pseudomonadota;c__Gammaproteobacteria;o__Pseudomonadales;f__Moraxellaceae;g__Acinetobacter;s__Acinetobacter pittii	97.57	0.931	d__Bacteria;p__Pseudomonadota;c__Gammaproteobacteria;o__Pseudomonadales;f__Moraxellaceae;g__Acinetobacter;s__	taxonomic classification defined by topology and ANI	topological placement and ANI have congruent species assignments	GCF_013009345.1, s__Acinetobacter geminorum, 95.0, 94.86, 0.884; GCF_002928115.1, s__Acinetobacter pittii_H, 95.0, 94.6, 0.853; GCF_001605885.1, s__Acinetobacter lactucae, 95.0, 93.45, 0.855; GCF_013344765.1, s__Acinetobacter lactucae_A, 95.0, 93.32, 0.89; GCF_000399685.1, s__Acinetobacter pittii_E, 95.0, 92.66, 0.832; GCF_000196795.1, s__Acinetobacter oleivorans, 95.0, 91.49, 0.828; GCF_00031393…	98.01	11	N/A	N/A
500441-22-s-srp-R10-Guppy-SUP	d__Bacteria;p__Pseudomonadota;c__Gammaproteobacteria;o__Pseudomonadales;f__Moraxellaceae;g__Acinetobacter;s__Acinetobacter pittii	GCF_000369045.1	95	d__Bacteria;p__Pseudomonadota;c__Gammaproteobacteria;o__Pseudomonadales;f__Moraxellaceae;g__Acinetobacter;s__Acinetobacter pittii	97.56	0.934	GCF_000369045.1	95	d__Bacteria;p__Pseudomonadota;c__Gammaproteobacteria;o__Pseudomonadales;f__Moraxellaceae;g__Acinetobacter;s__Acinetobacter pittii	97.56	0.934	d__Bacteria;p__Pseudomonadota;c__Gammaproteobacteria;o__Pseudomonadales;f__Moraxellaceae;g__Acinetobacter;s__	taxonomic classification defined by topology and ANI	topological placement and ANI have congruent species assignments	GCF_013009345.1, s__Acinetobacter geminorum, 95.0, 94.78, 0.882; GCF_002928115.1, s__Acinetobacter pittii_H, 95.0, 94.56, 0.856; GCF_001605885.1, s__Acinetobacter lactucae, 95.0, 93.46, 0.86; GCF_013344765.1, s__Acinetobacter lactucae_A, 95.0, 93.26, 0.892; GCF_000399685.1, s__Acinetobacter pittii_E, 95.0, 92.67, 0.836; GCF_000196795.1, s__Acinetobacter oleivorans, 95.0, 91.46, 0.837; GCF_0003139…	98.01	11	N/A	N/A
500441-22-s-srp-R10-Rerio-SUP	d__Bacteria;p__Pseudomonadota;c__Gammaproteobacteria;o__Pseudomonadales;f__Moraxellaceae;g__Acinetobacter;s__Acinetobacter pittii	GCF_000369045.1	95	d__Bacteria;p__Pseudomonadota;c__Gammaproteobacteria;o__Pseudomonadales;f__Moraxellaceae;g__Acinetobacter;s__Acinetobacter pittii	97.55	0.934	GCF_000369045.1	95	d__Bacteria;p__Pseudomonadota;c__Gammaproteobacteria;o__Pseudomonadales;f__Moraxellaceae;g__Acinetobacter;s__Acinetobacter pittii	97.55	0.934	d__Bacteria;p__Pseudomonadota;c__Gammaproteobacteria;o__Pseudomonadales;f__Moraxellaceae;g__Acinetobacter;s__	taxonomic classification defined by topology and ANI	topological placement and ANI have congruent species assignments	GCF_013009345.1, s__Acinetobacter geminorum, 95.0, 94.81, 0.882; GCF_002928115.1, s__Acinetobacter pittii_H, 95.0, 94.56, 0.856; GCF_001605885.1, s__Acinetobacter lactucae, 95.0, 93.46, 0.86; GCF_013344765.1, s__Acinetobacter lactucae_A, 95.0, 93.24, 0.893; GCF_000399685.1, s__Acinetobacter pittii_E, 95.0, 92.67, 0.836; GCF_000196795.1, s__Acinetobacter oleivorans, 95.0, 91.46, 0.827; GCF_0003139…	98.01	11	N/A	N/A
500441-22-s-srp-R9-Dorado-FAST	d__Bacteria;p__Pseudomonadota;c__Gammaproteobacteria;o__Pseudomonadales;f__Moraxellaceae;g__Acinetobacter;s__Acinetobacter pittii	GCF_000369045.1	95	d__Bacteria;p__Pseudomonadota;c__Gammaproteobacteria;o__Pseudomonadales;f__Moraxellaceae;g__Acinetobacter;s__Acinetobacter pittii	97.56	0.935	GCF_000369045.1	95	d__Bacteria;p__Pseudomonadota;c__Gammaproteobacteria;o__Pseudomonadales;f__Moraxellaceae;g__Acinetobacter;s__Acinetobacter pittii	97.56	0.935	d__Bacteria;p__Pseudomonadota;c__Gammaproteobacteria;o__Pseudomonadales;f__Moraxellaceae;g__Acinetobacter;s__	taxonomic classification defined by topology and ANI	topological placement and ANI have congruent species assignments	GCF_013009345.1, s__Acinetobacter geminorum, 95.0, 94.82, 0.875; GCF_002928115.1, s__Acinetobacter pittii_H, 95.0, 94.58, 0.856; GCF_001605885.1, s__Acinetobacter lactucae, 95.0, 93.46, 0.857; GCF_013344765.1, s__Acinetobacter lactucae_A, 95.0, 93.31, 0.885; GCF_000399685.1, s__Acinetobacter pittii_E, 95.0, 92.61, 0.84; GCF_000196795.1, s__Acinetobacter oleivorans, 95.0, 91.57, 0.827; GCF_0003139…	98.01	11	N/A	N/A
500441-22-s-srp-R9-Dorado-HAC	d__Bacteria;p__Pseudomonadota;c__Gammaproteobacteria;o__Pseudomonadales;f__Moraxellaceae;g__Acinetobacter;s__Acinetobacter pittii	GCF_000369045.1	95	d__Bacteria;p__Pseudomonadota;c__Gammaproteobacteria;o__Pseudomonadales;f__Moraxellaceae;g__Acinetobacter;s__Acinetobacter pittii	97.56	0.935	GCF_000369045.1	95	d__Bacteria;p__Pseudomonadota;c__Gammaproteobacteria;o__Pseudomonadales;f__Moraxellaceae;g__Acinetobacter;s__Acinetobacter pittii	97.56	0.935	d__Bacteria;p__Pseudomonadota;c__Gammaproteobacteria;o__Pseudomonadales;f__Moraxellaceae;g__Acinetobacter;s__	taxonomic classification defined by topology and ANI	topological placement and ANI have congruent species assignments	GCF_013009345.1, s__Acinetobacter geminorum, 95.0, 94.83, 0.874; GCF_002928115.1, s__Acinetobacter pittii_H, 95.0, 94.58, 0.856; GCF_001605885.1, s__Acinetobacter lactucae, 95.0, 93.46, 0.857; GCF_013344765.1, s__Acinetobacter lactucae_A, 95.0, 93.31, 0.886; GCF_000399685.1, s__Acinetobacter pittii_E, 95.0, 92.62, 0.838; GCF_000196795.1, s__Acinetobacter oleivorans, 95.0, 91.57, 0.834; GCF_000313…	98.01	11	N/A	N/A
500441-22-s-srp-R9-Dorado-SUP	d__Bacteria;p__Pseudomonadota;c__Gammaproteobacteria;o__Pseudomonadales;f__Moraxellaceae;g__Acinetobacter;s__Acinetobacter pittii	GCF_000369045.1	95	d__Bacteria;p__Pseudomonadota;c__Gammaproteobacteria;o__Pseudomonadales;f__Moraxellaceae;g__Acinetobacter;s__Acinetobacter pittii	97.59	0.932	GCF_000369045.1	95	d__Bacteria;p__Pseudomonadota;c__Gammaproteobacteria;o__Pseudomonadales;f__Moraxellaceae;g__Acinetobacter;s__Acinetobacter pittii	97.59	0.932	d__Bacteria;p__Pseudomonadota;c__Gammaproteobacteria;o__Pseudomonadales;f__Moraxellaceae;g__Acinetobacter;s__	taxonomic classification defined by topology and ANI	topological placement and ANI have congruent species assignments	GCF_013009345.1, s__Acinetobacter geminorum, 95.0, 94.85, 0.881; GCF_002928115.1, s__Acinetobacter pittii_H, 95.0, 94.58, 0.858; GCF_001605885.1, s__Acinetobacter lactucae, 95.0, 93.5, 0.849; GCF_013344765.1, s__Acinetobacter lactucae_A, 95.0, 93.31, 0.886; GCF_000399685.1, s__Acinetobacter pittii_E, 95.0, 92.65, 0.832; GCF_000196795.1, s__Acinetobacter oleivorans, 95.0, 91.52, 0.827; GCF_0003139…	98.01	11	N/A	N/A
500441-22-s-srp-R9-Guppy-FAST	d__Bacteria;p__Pseudomonadota;c__Gammaproteobacteria;o__Pseudomonadales;f__Moraxellaceae;g__Acinetobacter;s__Acinetobacter pittii	GCF_000369045.1	95	d__Bacteria;p__Pseudomonadota;c__Gammaproteobacteria;o__Pseudomonadales;f__Moraxellaceae;g__Acinetobacter;s__Acinetobacter pittii	97.6	0.925	GCF_000369045.1	95	d__Bacteria;p__Pseudomonadota;c__Gammaproteobacteria;o__Pseudomonadales;f__Moraxellaceae;g__Acinetobacter;s__Acinetobacter pittii	97.6	0.925	d__Bacteria;p__Pseudomonadota;c__Gammaproteobacteria;o__Pseudomonadales;f__Moraxellaceae;g__Acinetobacter;s__	taxonomic classification defined by topology and ANI	topological placement and ANI have congruent species assignments	GCF_013009345.1, s__Acinetobacter geminorum, 95.0, 94.85, 0.875; GCF_002928115.1, s__Acinetobacter pittii_H, 95.0, 94.6, 0.852; GCF_001605885.1, s__Acinetobacter lactucae, 95.0, 93.51, 0.855; GCF_013344765.1, s__Acinetobacter lactucae_A, 95.0, 93.29, 0.891; GCF_000399685.1, s__Acinetobacter pittii_E, 95.0, 92.64, 0.84; GCF_000196795.1, s__Acinetobacter oleivorans, 95.0, 91.51, 0.838; GCF_00031393…	98.01	11	N/A	N/A
500441-22-s-srp-R9-Guppy-HAC	d__Bacteria;p__Pseudomonadota;c__Gammaproteobacteria;o__Pseudomonadales;f__Moraxellaceae;g__Acinetobacter;s__Acinetobacter pittii	GCF_000369045.1	95	d__Bacteria;p__Pseudomonadota;c__Gammaproteobacteria;o__Pseudomonadales;f__Moraxellaceae;g__Acinetobacter;s__Acinetobacter pittii	97.57	0.929	GCF_000369045.1	95	d__Bacteria;p__Pseudomonadota;c__Gammaproteobacteria;o__Pseudomonadales;f__Moraxellaceae;g__Acinetobacter;s__Acinetobacter pittii	97.57	0.929	d__Bacteria;p__Pseudomonadota;c__Gammaproteobacteria;o__Pseudomonadales;f__Moraxellaceae;g__Acinetobacter;s__	taxonomic classification defined by topology and ANI	topological placement and ANI have congruent species assignments	GCF_013009345.1, s__Acinetobacter geminorum, 95.0, 94.89, 0.876; GCF_002928115.1, s__Acinetobacter pittii_H, 95.0, 94.61, 0.85; GCF_001605885.1, s__Acinetobacter lactucae, 95.0, 93.42, 0.86; GCF_013344765.1, s__Acinetobacter lactucae_A, 95.0, 93.29, 0.892; GCF_000399685.1, s__Acinetobacter pittii_E, 95.0, 92.62, 0.837; GCF_000196795.1, s__Acinetobacter oleivorans, 95.0, 91.53, 0.842; GCF_00031393…	98.01	11	N/A	N/A
500441-22-s-srp-R9-Guppy-SUP	d__Bacteria;p__Pseudomonadota;c__Gammaproteobacteria;o__Pseudomonadales;f__Moraxellaceae;g__Acinetobacter;s__Acinetobacter pittii	GCF_000369045.1	95	d__Bacteria;p__Pseudomonadota;c__Gammaproteobacteria;o__Pseudomonadales;f__Moraxellaceae;g__Acinetobacter;s__Acinetobacter pittii	97.55	0.933	GCF_000369045.1	95	d__Bacteria;p__Pseudomonadota;c__Gammaproteobacteria;o__Pseudomonadales;f__Moraxellaceae;g__Acinetobacter;s__Acinetobacter pittii	97.55	0.933	d__Bacteria;p__Pseudomonadota;c__Gammaproteobacteria;o__Pseudomonadales;f__Moraxellaceae;g__Acinetobacter;s__	taxonomic classification defined by topology and ANI	topological placement and ANI have congruent species assignments	GCF_013009345.1, s__Acinetobacter geminorum, 95.0, 94.9, 0.88; GCF_002928115.1, s__Acinetobacter pittii_H, 95.0, 94.58, 0.854; GCF_001605885.1, s__Acinetobacter lactucae, 95.0, 93.51, 0.859; GCF_013344765.1, s__Acinetobacter lactucae_A, 95.0, 93.25, 0.895; GCF_000399685.1, s__Acinetobacter pittii_E, 95.0, 92.67, 0.835; GCF_000196795.1, s__Acinetobacter oleivorans, 95.0, 91.53, 0.83; GCF_000313935…	98.01	11	N/A	N/A

## Sheet: bursta
user_genome	classification	fastani_reference	fastani_reference_radius	fastani_taxonomy	fastani_ani	fastani_af	closest_placement_reference	closest_placement_radius	closest_placement_taxonomy	closest_placement_ani	closest_placement_af	pplacer_taxonomy	classification_method	note	other_related_references(genome_id,species_name,radius,ANI,AF)	msa_percent	translation_table	red_value	warnings
ATCCBAA67_R10_Dorado_FAST_flye	d__Bacteria;p__Pseudomonadota;c__Gammaproteobacteria;o__Burkholderiales;f__Burkholderiaceae;g__Burkholderia;s__Burkholderia stabilis	GCF_001742165.1	95	d__Bacteria;p__Pseudomonadota;c__Gammaproteobacteria;o__Burkholderiales;f__Burkholderiaceae;g__Burkholderia;s__Burkholderia stabilis	99.84	0.998	GCF_001742165.1	95	d__Bacteria;p__Pseudomonadota;c__Gammaproteobacteria;o__Burkholderiales;f__Burkholderiaceae;g__Burkholderia;s__Burkholderia stabilis	99.84	0.998	d__Bacteria;p__Pseudomonadota;c__Gammaproteobacteria;o__Burkholderiales;f__Burkholderiaceae;g__Burkholderia;s__	taxonomic classification defined by topology and ANI	topological placement and ANI have congruent species assignments	GCF_001028665.1, s__Burkholderia pyrrocinia, 95.0, 93.13, 0.766; GCF_003330765.1, s__Burkholderia pyrrocinia_B, 95.0, 92.89, 0.772; GCF_001039005.1, s__Burkholderia cepacia_C, 95.0, 92.88, 0.747; GCF_001883705.2, s__Burkholderia catarinensis, 95.0, 92.64, 0.752; GCF_902833225.1, s__Burkholderia sp902833225, 95.0, 92.45, 0.801; GCF_902499125.1, s__Burkholderia arboris, 95.0, 92.34, 0.818; GCF_0116…	16.92	11	N/A	Genome has more than 80.8% of markers with multiple hits
ATCCBAA67_R10_Dorado_FAST_medaka_2.0	d__Bacteria;p__Pseudomonadota;c__Gammaproteobacteria;o__Burkholderiales;f__Burkholderiaceae;g__Burkholderia;s__Burkholderia stabilis	GCF_001742165.1	95	d__Bacteria;p__Pseudomonadota;c__Gammaproteobacteria;o__Burkholderiales;f__Burkholderiaceae;g__Burkholderia;s__Burkholderia stabilis	99.88	0.997	GCF_011605345.1	95	d__Bacteria;p__Pseudomonadota;c__Gammaproteobacteria;o__Burkholderiales;f__Burkholderiaceae;g__Burkholderia;s__Burkholderia sp011605345	92.39	0.767	d__Bacteria;p__Pseudomonadota;c__Gammaproteobacteria;o__Burkholderiales;f__Burkholderiaceae;g__Burkholderia;s__	ANI	N/A	GCF_001028665.1, s__Burkholderia pyrrocinia, 95.0, 93.2, 0.764; GCF_003330765.1, s__Burkholderia pyrrocinia_B, 95.0, 92.93, 0.772; GCF_001039005.1, s__Burkholderia cepacia_C, 95.0, 92.91, 0.743; GCF_001883705.2, s__Burkholderia catarinensis, 95.0, 92.65, 0.752; GCF_902833225.1, s__Burkholderia sp902833225, 95.0, 92.47, 0.804; GCF_902499125.1, s__Burkholderia arboris, 95.0, 92.39, 0.819; GCF_00141…	12.31	11	N/A	Genome has more than 85.8% of markers with multiple hits
ATCCBAA67_R10_Dorado_HAC_flye	d__Bacteria;p__Pseudomonadota;c__Gammaproteobacteria;o__Burkholderiales;f__Burkholderiaceae;g__Burkholderia;s__Burkholderia stabilis	GCF_001742165.1	95	d__Bacteria;p__Pseudomonadota;c__Gammaproteobacteria;o__Burkholderiales;f__Burkholderiaceae;g__Burkholderia;s__Burkholderia stabilis	99.99	0.999	GCF_001742165.1	95	d__Bacteria;p__Pseudomonadota;c__Gammaproteobacteria;o__Burkholderiales;f__Burkholderiaceae;g__Burkholderia;s__Burkholderia stabilis	99.99	0.999	d__Bacteria;p__Pseudomonadota;c__Gammaproteobacteria;o__Burkholderiales;f__Burkholderiaceae;g__Burkholderia;s__	taxonomic classification defined by topology and ANI	topological placement and ANI have congruent species assignments	GCF_001028665.1, s__Burkholderia pyrrocinia, 95.0, 93.3, 0.765; GCF_003330765.1, s__Burkholderia pyrrocinia_B, 95.0, 93.12, 0.763; GCF_001039005.1, s__Burkholderia cepacia_C, 95.0, 92.95, 0.751; GCF_001883705.2, s__Burkholderia catarinensis, 95.0, 92.77, 0.756; GCF_902833225.1, s__Burkholderia sp902833225, 95.0, 92.6, 0.803; GCF_902499125.1, s__Burkholderia arboris, 95.0, 92.45, 0.818; GCF_011605…	51.16	11	N/A	Genome has more than 48.3% of markers with multiple hits
ATCCBAA67_R10_Dorado_HAC_medaka_2.0	d__Bacteria;p__Pseudomonadota;c__Gammaproteobacteria;o__Burkholderiales;f__Burkholderiaceae;g__Burkholderia;s__Burkholderia stabilis	GCF_001742165.1	95	d__Bacteria;p__Pseudomonadota;c__Gammaproteobacteria;o__Burkholderiales;f__Burkholderiaceae;g__Burkholderia;s__Burkholderia stabilis	99.99	0.999	GCF_001742165.1	95	d__Bacteria;p__Pseudomonadota;c__Gammaproteobacteria;o__Burkholderiales;f__Burkholderiaceae;g__Burkholderia;s__Burkholderia stabilis	99.99	0.999	d__Bacteria;p__Pseudomonadota;c__Gammaproteobacteria;o__Burkholderiales;f__Burkholderiaceae;g__Burkholderia;s__	taxonomic classification defined by topology and ANI	topological placement and ANI have congruent species assignments	GCF_001028665.1, s__Burkholderia pyrrocinia, 95.0, 93.28, 0.768; GCF_003330765.1, s__Burkholderia pyrrocinia_B, 95.0, 93.04, 0.767; GCF_001039005.1, s__Burkholderia cepacia_C, 95.0, 92.99, 0.749; GCF_001883705.2, s__Burkholderia catarinensis, 95.0, 92.78, 0.757; GCF_902833225.1, s__Burkholderia sp902833225, 95.0, 92.57, 0.804; GCF_902499125.1, s__Burkholderia arboris, 95.0, 92.44, 0.816; GCF_0116…	50.33	11	N/A	Genome has more than 49.2% of markers with multiple hits
ATCCBAA67_R10_Dorado_HAC_new	d__Bacteria;p__Pseudomonadota;c__Gammaproteobacteria;o__Burkholderiales;f__Burkholderiaceae;g__Burkholderia;s__Burkholderia stabilis	GCF_001742165.1	95	d__Bacteria;p__Pseudomonadota;c__Gammaproteobacteria;o__Burkholderiales;f__Burkholderiaceae;g__Burkholderia;s__Burkholderia stabilis	99.99	0.999	GCF_001742165.1	95	d__Bacteria;p__Pseudomonadota;c__Gammaproteobacteria;o__Burkholderiales;f__Burkholderiaceae;g__Burkholderia;s__Burkholderia stabilis	99.99	0.999	d__Bacteria;p__Pseudomonadota;c__Gammaproteobacteria;o__Burkholderiales;f__Burkholderiaceae;g__Burkholderia;s__	taxonomic classification defined by topology and ANI	topological placement and ANI have congruent species assignments	GCF_001028665.1, s__Burkholderia pyrrocinia, 95.0, 93.28, 0.768; GCF_003330765.1, s__Burkholderia pyrrocinia_B, 95.0, 93.05, 0.768; GCF_001039005.1, s__Burkholderia cepacia_C, 95.0, 92.98, 0.749; GCF_001883705.2, s__Burkholderia catarinensis, 95.0, 92.77, 0.757; GCF_902833225.1, s__Burkholderia sp902833225, 95.0, 92.57, 0.804; GCF_902499125.1, s__Burkholderia arboris, 95.0, 92.45, 0.817; GCF_0116…	51.16	11	N/A	Genome has more than 48.3% of markers with multiple hits
ATCCBAA67_R10_Dorado_SUP_flye	d__Bacteria;p__Pseudomonadota;c__Gammaproteobacteria;o__Burkholderiales;f__Burkholderiaceae;g__Burkholderia;s__Burkholderia stabilis	GCF_001742165.1	95	d__Bacteria;p__Pseudomonadota;c__Gammaproteobacteria;o__Burkholderiales;f__Burkholderiaceae;g__Burkholderia;s__Burkholderia stabilis	99.99	0.999	GCF_001742165.1	95	d__Bacteria;p__Pseudomonadota;c__Gammaproteobacteria;o__Burkholderiales;f__Burkholderiaceae;g__Burkholderia;s__Burkholderia stabilis	99.99	0.999	d__Bacteria;p__Pseudomonadota;c__Gammaproteobacteria;o__Burkholderiales;f__Burkholderiaceae;g__Burkholderia;s__	taxonomic classification defined by topology and ANI	topological placement and ANI have congruent species assignments	GCF_001028665.1, s__Burkholderia pyrrocinia, 95.0, 93.24, 0.768; GCF_001039005.1, s__Burkholderia cepacia_C, 95.0, 92.99, 0.753; GCF_003330765.1, s__Burkholderia pyrrocinia_B, 95.0, 92.95, 0.774; GCF_001883705.2, s__Burkholderia catarinensis, 95.0, 92.74, 0.757; GCF_902833225.1, s__Burkholderia sp902833225, 95.0, 92.46, 0.81; GCF_902499125.1, s__Burkholderia arboris, 95.0, 92.44, 0.817; GCF_01160…	40.42	11	N/A	Genome has more than 59.2% of markers with multiple hits
ATCCBAA67_R10_Dorado_SUP_medaka_2.0	d__Bacteria;p__Pseudomonadota;c__Gammaproteobacteria;o__Burkholderiales;f__Burkholderiaceae;g__Burkholderia;s__Burkholderia stabilis	GCF_001742165.1	95	d__Bacteria;p__Pseudomonadota;c__Gammaproteobacteria;o__Burkholderiales;f__Burkholderiaceae;g__Burkholderia;s__Burkholderia stabilis	100	0.999	GCF_001742165.1	95	d__Bacteria;p__Pseudomonadota;c__Gammaproteobacteria;o__Burkholderiales;f__Burkholderiaceae;g__Burkholderia;s__Burkholderia stabilis	100	0.999	d__Bacteria;p__Pseudomonadota;c__Gammaproteobacteria;o__Burkholderiales;f__Burkholderiaceae;g__Burkholderia;s__	taxonomic classification defined by topology and ANI	topological placement and ANI have congruent species assignments	GCF_001028665.1, s__Burkholderia pyrrocinia, 95.0, 93.29, 0.765; GCF_001039005.1, s__Burkholderia cepacia_C, 95.0, 92.98, 0.753; GCF_003330765.1, s__Burkholderia pyrrocinia_B, 95.0, 92.96, 0.774; GCF_001883705.2, s__Burkholderia catarinensis, 95.0, 92.76, 0.755; GCF_902833225.1, s__Burkholderia sp902833225, 95.0, 92.48, 0.809; GCF_902499125.1, s__Burkholderia arboris, 95.0, 92.45, 0.817; GCF_0116…	39.62	11	N/A	Genome has more than 60.0% of markers with multiple hits
ATCCBAA67_R10_Dorado_SUP_new	d__Bacteria;p__Pseudomonadota;c__Gammaproteobacteria;o__Burkholderiales;f__Burkholderiaceae;g__Burkholderia;s__Burkholderia stabilis	GCF_001742165.1	95	d__Bacteria;p__Pseudomonadota;c__Gammaproteobacteria;o__Burkholderiales;f__Burkholderiaceae;g__Burkholderia;s__Burkholderia stabilis	100	0.999	GCF_001742165.1	95	d__Bacteria;p__Pseudomonadota;c__Gammaproteobacteria;o__Burkholderiales;f__Burkholderiaceae;g__Burkholderia;s__Burkholderia stabilis	100	0.999	d__Bacteria;p__Pseudomonadota;c__Gammaproteobacteria;o__Burkholderiales;f__Burkholderiaceae;g__Burkholderia;s__	taxonomic classification defined by topology and ANI	topological placement and ANI have congruent species assignments	GCF_001028665.1, s__Burkholderia pyrrocinia, 95.0, 93.29, 0.765; GCF_001039005.1, s__Burkholderia cepacia_C, 95.0, 92.99, 0.752; GCF_003330765.1, s__Burkholderia pyrrocinia_B, 95.0, 92.97, 0.774; GCF_001883705.2, s__Burkholderia catarinensis, 95.0, 92.77, 0.755; GCF_902833225.1, s__Burkholderia sp902833225, 95.0, 92.48, 0.809; GCF_902499125.1, s__Burkholderia arboris, 95.0, 92.45, 0.817; GCF_0116…	39.62	11	N/A	Genome has more than 60.0% of markers with multiple hits
ATCCBAA67_R10_Guppy_FAST_flye	d__Bacteria;p__Pseudomonadota;c__Gammaproteobacteria;o__Burkholderiales;f__Burkholderiaceae;g__Burkholderia;s__Burkholderia stabilis	GCF_001742165.1	95	d__Bacteria;p__Pseudomonadota;c__Gammaproteobacteria;o__Burkholderiales;f__Burkholderiaceae;g__Burkholderia;s__Burkholderia stabilis	99.83	0.997	GCF_001742165.1	95	d__Bacteria;p__Pseudomonadota;c__Gammaproteobacteria;o__Burkholderiales;f__Burkholderiaceae;g__Burkholderia;s__Burkholderia stabilis	99.83	0.997	d__Bacteria;p__Pseudomonadota;c__Gammaproteobacteria;o__Burkholderiales;f__Burkholderiaceae;g__Burkholderia;s__	taxonomic classification defined by topology and ANI	topological placement and ANI have congruent species assignments	GCF_001028665.1, s__Burkholderia pyrrocinia, 95.0, 93.11, 0.77; GCF_003330765.1, s__Burkholderia pyrrocinia_B, 95.0, 92.86, 0.772; GCF_001039005.1, s__Burkholderia cepacia_C, 95.0, 92.83, 0.755; GCF_001883705.2, s__Burkholderia catarinensis, 95.0, 92.69, 0.755; GCF_902833225.1, s__Burkholderia sp902833225, 95.0, 92.47, 0.806; GCF_011605345.1, s__Burkholderia sp011605345, 95.0, 92.34, 0.772; GCF_9…	18.47	11	N/A	Genome has more than 77.5% of markers with multiple hits
ATCCBAA67_R10_Guppy_FAST_medaka_2.0	d__Bacteria;p__Pseudomonadota;c__Gammaproteobacteria;o__Burkholderiales;f__Burkholderiaceae;g__Burkholderia;s__Burkholderia stabilis	GCF_001742165.1	95	d__Bacteria;p__Pseudomonadota;c__Gammaproteobacteria;o__Burkholderiales;f__Burkholderiaceae;g__Burkholderia;s__Burkholderia stabilis	99.88	0.998	GCF_001742165.1	95	d__Bacteria;p__Pseudomonadota;c__Gammaproteobacteria;o__Burkholderiales;f__Burkholderiaceae;g__Burkholderia;s__Burkholderia stabilis	99.88	0.998	d__Bacteria;p__Pseudomonadota;c__Gammaproteobacteria;o__Burkholderiales;f__Burkholderiaceae;g__Burkholderia;s__	taxonomic classification defined by topology and ANI	topological placement and ANI have congruent species assignments	GCF_001028665.1, s__Burkholderia pyrrocinia, 95.0, 93.13, 0.771; GCF_003330765.1, s__Burkholderia pyrrocinia_B, 95.0, 92.92, 0.769; GCF_001039005.1, s__Burkholderia cepacia_C, 95.0, 92.9, 0.755; GCF_001883705.2, s__Burkholderia catarinensis, 95.0, 92.7, 0.759; GCF_902833225.1, s__Burkholderia sp902833225, 95.0, 92.51, 0.804; GCF_011605345.1, s__Burkholderia sp011605345, 95.0, 92.42, 0.77; GCF_902…	16.46	11	N/A	Genome has more than 81.7% of markers with multiple hits
ATCCBAA67_R10_Guppy_HAC_flye	d__Bacteria;p__Pseudomonadota;c__Gammaproteobacteria;o__Burkholderiales;f__Burkholderiaceae;g__Burkholderia;s__Burkholderia stabilis	GCF_001742165.1	95	d__Bacteria;p__Pseudomonadota;c__Gammaproteobacteria;o__Burkholderiales;f__Burkholderiaceae;g__Burkholderia;s__Burkholderia stabilis	99.99	0.999	GCF_001742165.1	95	d__Bacteria;p__Pseudomonadota;c__Gammaproteobacteria;o__Burkholderiales;f__Burkholderiaceae;g__Burkholderia;s__Burkholderia stabilis	99.99	0.999	d__Bacteria;p__Pseudomonadota;c__Gammaproteobacteria;o__Burkholderiales;f__Burkholderiaceae;g__Burkholderia;s__	taxonomic classification defined by topology and ANI	topological placement and ANI have congruent species assignments	GCF_001028665.1, s__Burkholderia pyrrocinia, 95.0, 93.21, 0.768; GCF_003330765.1, s__Burkholderia pyrrocinia_B, 95.0, 93.0, 0.767; GCF_001039005.1, s__Burkholderia cepacia_C, 95.0, 92.99, 0.75; GCF_001883705.2, s__Burkholderia catarinensis, 95.0, 92.8, 0.753; GCF_902499125.1, s__Burkholderia arboris, 95.0, 92.46, 0.814; GCF_902833225.1, s__Burkholderia sp902833225, 95.0, 92.45, 0.806; GCF_0116053…	30.39	11	N/A	Genome has more than 69.2% of markers with multiple hits
ATCCBAA67_R10_Guppy_HAC_medaka_2.0	d__Bacteria;p__Pseudomonadota;c__Gammaproteobacteria;o__Burkholderiales;f__Burkholderiaceae;g__Burkholderia;s__Burkholderia stabilis	GCF_001742165.1	95	d__Bacteria;p__Pseudomonadota;c__Gammaproteobacteria;o__Burkholderiales;f__Burkholderiaceae;g__Burkholderia;s__Burkholderia stabilis	99.99	0.998	GCF_001742165.1	95	d__Bacteria;p__Pseudomonadota;c__Gammaproteobacteria;o__Burkholderiales;f__Burkholderiaceae;g__Burkholderia;s__Burkholderia stabilis	99.99	0.998	d__Bacteria;p__Pseudomonadota;c__Gammaproteobacteria;o__Burkholderiales;f__Burkholderiaceae;g__Burkholderia;s__	taxonomic classification defined by topology and ANI	topological placement and ANI have congruent species assignments	GCF_001028665.1, s__Burkholderia pyrrocinia, 95.0, 93.22, 0.767; GCF_003330765.1, s__Burkholderia pyrrocinia_B, 95.0, 93.01, 0.767; GCF_001039005.1, s__Burkholderia cepacia_C, 95.0, 92.98, 0.751; GCF_001883705.2, s__Burkholderia catarinensis, 95.0, 92.81, 0.752; GCF_902833225.1, s__Burkholderia sp902833225, 95.0, 92.48, 0.806; GCF_902499125.1, s__Burkholderia arboris, 95.0, 92.47, 0.815; GCF_0116…	31.22	11	N/A	Genome has more than 68.3% of markers with multiple hits
ATCCBAA67_R10_Guppy_HAC_new	d__Bacteria;p__Pseudomonadota;c__Gammaproteobacteria;o__Burkholderiales;f__Burkholderiaceae;g__Burkholderia;s__Burkholderia stabilis	GCF_001742165.1	95	d__Bacteria;p__Pseudomonadota;c__Gammaproteobacteria;o__Burkholderiales;f__Burkholderiaceae;g__Burkholderia;s__Burkholderia stabilis	99.99	0.999	GCF_001742165.1	95	d__Bacteria;p__Pseudomonadota;c__Gammaproteobacteria;o__Burkholderiales;f__Burkholderiaceae;g__Burkholderia;s__Burkholderia stabilis	99.99	0.999	d__Bacteria;p__Pseudomonadota;c__Gammaproteobacteria;o__Burkholderiales;f__Burkholderiaceae;g__Burkholderia;s__	taxonomic classification defined by topology and ANI	topological placement and ANI have congruent species assignments	GCF_001028665.1, s__Burkholderia pyrrocinia, 95.0, 93.23, 0.768; GCF_001039005.1, s__Burkholderia cepacia_C, 95.0, 93.02, 0.748; GCF_003330765.1, s__Burkholderia pyrrocinia_B, 95.0, 93.02, 0.768; GCF_001883705.2, s__Burkholderia catarinensis, 95.0, 92.81, 0.752; GCF_902499125.1, s__Burkholderia arboris, 95.0, 92.46, 0.816; GCF_902833225.1, s__Burkholderia sp902833225, 95.0, 92.45, 0.805; GCF_0116…	30.39	11	N/A	Genome has more than 69.2% of markers with multiple hits
ATCCBAA67_R10_Guppy_SUP_flye	d__Bacteria;p__Pseudomonadota;c__Gammaproteobacteria;o__Burkholderiales;f__Burkholderiaceae;g__Burkholderia;s__Burkholderia stabilis	GCF_001742165.1	95	d__Bacteria;p__Pseudomonadota;c__Gammaproteobacteria;o__Burkholderiales;f__Burkholderiaceae;g__Burkholderia;s__Burkholderia stabilis	99.99	0.998	GCF_001742165.1	95	d__Bacteria;p__Pseudomonadota;c__Gammaproteobacteria;o__Burkholderiales;f__Burkholderiaceae;g__Burkholderia;s__Burkholderia stabilis	99.99	0.998	d__Bacteria;p__Pseudomonadota;c__Gammaproteobacteria;o__Burkholderiales;f__Burkholderiaceae;g__Burkholderia;s__	taxonomic classification defined by topology and ANI	topological placement and ANI have congruent species assignments	GCF_001028665.1, s__Burkholderia pyrrocinia, 95.0, 93.24, 0.767; GCF_003330765.1, s__Burkholderia pyrrocinia_B, 95.0, 93.01, 0.769; GCF_001039005.1, s__Burkholderia cepacia_C, 95.0, 92.97, 0.755; GCF_001883705.2, s__Burkholderia catarinensis, 95.0, 92.74, 0.762; GCF_902833225.1, s__Burkholderia sp902833225, 95.0, 92.52, 0.815; GCF_011605345.1, s__Burkholderia sp011605345, 95.0, 92.44, 0.771; GCF_…	33.72	11	N/A	Genome has more than 65.8% of markers with multiple hits
ATCCBAA67_R10_Guppy_SUP_medaka_2.0	d__Bacteria;p__Pseudomonadota;c__Gammaproteobacteria;o__Burkholderiales;f__Burkholderiaceae;g__Burkholderia;s__Burkholderia stabilis	GCF_001742165.1	95	d__Bacteria;p__Pseudomonadota;c__Gammaproteobacteria;o__Burkholderiales;f__Burkholderiaceae;g__Burkholderia;s__Burkholderia stabilis	100	0.998	GCF_001742165.1	95	d__Bacteria;p__Pseudomonadota;c__Gammaproteobacteria;o__Burkholderiales;f__Burkholderiaceae;g__Burkholderia;s__Burkholderia stabilis	100	0.998	d__Bacteria;p__Pseudomonadota;c__Gammaproteobacteria;o__Burkholderiales;f__Burkholderiaceae;g__Burkholderia;s__	taxonomic classification defined by topology and ANI	topological placement and ANI have congruent species assignments	GCF_001028665.1, s__Burkholderia pyrrocinia, 95.0, 93.27, 0.765; GCF_003330765.1, s__Burkholderia pyrrocinia_B, 95.0, 93.04, 0.767; GCF_001039005.1, s__Burkholderia cepacia_C, 95.0, 93.0, 0.753; GCF_001883705.2, s__Burkholderia catarinensis, 95.0, 92.74, 0.759; GCF_902833225.1, s__Burkholderia sp902833225, 95.0, 92.52, 0.815; GCF_902499125.1, s__Burkholderia arboris, 95.0, 92.47, 0.821; GCF_01160…	32.89	11	N/A	Genome has more than 66.7% of markers with multiple hits
ATCCBAA67_R10_Guppy_SUP_new	d__Bacteria;p__Pseudomonadota;c__Gammaproteobacteria;o__Burkholderiales;f__Burkholderiaceae;g__Burkholderia;s__Burkholderia stabilis	GCF_001742165.1	95	d__Bacteria;p__Pseudomonadota;c__Gammaproteobacteria;o__Burkholderiales;f__Burkholderiaceae;g__Burkholderia;s__Burkholderia stabilis	100	0.998	GCF_001742165.1	95	d__Bacteria;p__Pseudomonadota;c__Gammaproteobacteria;o__Burkholderiales;f__Burkholderiaceae;g__Burkholderia;s__Burkholderia stabilis	100	0.998	d__Bacteria;p__Pseudomonadota;c__Gammaproteobacteria;o__Burkholderiales;f__Burkholderiaceae;g__Burkholderia;s__	taxonomic classification defined by topology and ANI	topological placement and ANI have congruent species assignments	GCF_001028665.1, s__Burkholderia pyrrocinia, 95.0, 93.25, 0.766; GCF_003330765.1, s__Burkholderia pyrrocinia_B, 95.0, 93.03, 0.768; GCF_001039005.1, s__Burkholderia cepacia_C, 95.0, 92.97, 0.755; GCF_001883705.2, s__Burkholderia catarinensis, 95.0, 92.74, 0.76; GCF_902833225.1, s__Burkholderia sp902833225, 95.0, 92.52, 0.815; GCF_902499125.1, s__Burkholderia arboris, 95.0, 92.47, 0.822; GCF_01160…	32.89	11	N/A	Genome has more than 66.7% of markers with multiple hits
ATCCBAA67_R10_Rerio_SUP_new	d__Bacteria;p__Pseudomonadota;c__Gammaproteobacteria;o__Burkholderiales;f__Burkholderiaceae;g__Burkholderia;s__Burkholderia stabilis	GCF_001742165.1	95	d__Bacteria;p__Pseudomonadota;c__Gammaproteobacteria;o__Burkholderiales;f__Burkholderiaceae;g__Burkholderia;s__Burkholderia stabilis	99.99	0.999	GCF_001742165.1	95	d__Bacteria;p__Pseudomonadota;c__Gammaproteobacteria;o__Burkholderiales;f__Burkholderiaceae;g__Burkholderia;s__Burkholderia stabilis	99.99	0.999	d__Bacteria;p__Pseudomonadota;c__Gammaproteobacteria;o__Burkholderiales;f__Burkholderiaceae;g__Burkholderia;s__	taxonomic classification defined by topology and ANI	topological placement and ANI have congruent species assignments	GCF_001028665.1, s__Burkholderia pyrrocinia, 95.0, 93.25, 0.772; GCF_003330765.1, s__Burkholderia pyrrocinia_B, 95.0, 93.06, 0.766; GCF_001039005.1, s__Burkholderia cepacia_C, 95.0, 92.98, 0.753; GCF_001883705.2, s__Burkholderia catarinensis, 95.0, 92.78, 0.752; GCF_902833225.1, s__Burkholderia sp902833225, 95.0, 92.51, 0.805; GCF_011605345.1, s__Burkholderia sp011605345, 95.0, 92.41, 0.771; GCF_…	44.55	11	N/A	Genome has more than 55.0% of markers with multiple hits
ATCCBAA67_R9_Dorado_FAST_flye	d__Bacteria;p__Pseudomonadota;c__Gammaproteobacteria;o__Burkholderiales;f__Burkholderiaceae;g__Burkholderia;s__Burkholderia stabilis	GCF_001742165.1	95	d__Bacteria;p__Pseudomonadota;c__Gammaproteobacteria;o__Burkholderiales;f__Burkholderiaceae;g__Burkholderia;s__Burkholderia stabilis	99.97	0.998	GCF_001742165.1	95	d__Bacteria;p__Pseudomonadota;c__Gammaproteobacteria;o__Burkholderiales;f__Burkholderiaceae;g__Burkholderia;s__Burkholderia stabilis	99.97	0.998	d__Bacteria;p__Pseudomonadota;c__Gammaproteobacteria;o__Burkholderiales;f__Burkholderiaceae;g__Burkholderia;s__	taxonomic classification defined by topology and ANI	topological placement and ANI have congruent species assignments	GCF_001028665.1, s__Burkholderia pyrrocinia, 95.0, 93.22, 0.77; GCF_003330765.1, s__Burkholderia pyrrocinia_B, 95.0, 93.03, 0.769; GCF_001039005.1, s__Burkholderia cepacia_C, 95.0, 92.98, 0.75; GCF_001883705.2, s__Burkholderia catarinensis, 95.0, 92.76, 0.754; GCF_902833225.1, s__Burkholderia sp902833225, 95.0, 92.51, 0.812; GCF_902499125.1, s__Burkholderia arboris, 95.0, 92.44, 0.818; GCF_011605…	93.19	11	N/A	N/A
ATCCBAA67_R9_Dorado_FAST_new	d__Bacteria;p__Pseudomonadota;c__Gammaproteobacteria;o__Burkholderiales;f__Burkholderiaceae;g__Burkholderia;s__Burkholderia stabilis	GCF_001742165.1	95	d__Bacteria;p__Pseudomonadota;c__Gammaproteobacteria;o__Burkholderiales;f__Burkholderiaceae;g__Burkholderia;s__Burkholderia stabilis	99.99	0.998	GCF_001742165.1	95	d__Bacteria;p__Pseudomonadota;c__Gammaproteobacteria;o__Burkholderiales;f__Burkholderiaceae;g__Burkholderia;s__Burkholderia stabilis	99.99	0.998	d__Bacteria;p__Pseudomonadota;c__Gammaproteobacteria;o__Burkholderiales;f__Burkholderiaceae;g__Burkholderia;s__	taxonomic classification defined by topology and ANI	topological placement and ANI have congruent species assignments	GCF_001028665.1, s__Burkholderia pyrrocinia, 95.0, 93.23, 0.768; GCF_003330765.1, s__Burkholderia pyrrocinia_B, 95.0, 93.05, 0.766; GCF_001039005.1, s__Burkholderia cepacia_C, 95.0, 92.96, 0.755; GCF_001883705.2, s__Burkholderia catarinensis, 95.0, 92.8, 0.756; GCF_902833225.1, s__Burkholderia sp902833225, 95.0, 92.53, 0.806; GCF_902499125.1, s__Burkholderia arboris, 95.0, 92.43, 0.819; GCF_01160…	94.94	11	N/A	N/A
ATCCBAA67_R9_Dorado_HAC_flye	d__Bacteria;p__Pseudomonadota;c__Gammaproteobacteria;o__Burkholderiales;f__Burkholderiaceae;g__Burkholderia;s__Burkholderia stabilis	GCF_001742165.1	95	d__Bacteria;p__Pseudomonadota;c__Gammaproteobacteria;o__Burkholderiales;f__Burkholderiaceae;g__Burkholderia;s__Burkholderia stabilis	99.98	0.999	GCF_001742165.1	95	d__Bacteria;p__Pseudomonadota;c__Gammaproteobacteria;o__Burkholderiales;f__Burkholderiaceae;g__Burkholderia;s__Burkholderia stabilis	99.98	0.999	d__Bacteria;p__Pseudomonadota;c__Gammaproteobacteria;o__Burkholderiales;f__Burkholderiaceae;g__Burkholderia;s__	taxonomic classification defined by topology and ANI	topological placement and ANI have congruent species assignments	GCF_001028665.1, s__Burkholderia pyrrocinia, 95.0, 93.22, 0.767; GCF_003330765.1, s__Burkholderia pyrrocinia_B, 95.0, 93.0, 0.768; GCF_001039005.1, s__Burkholderia cepacia_C, 95.0, 92.97, 0.748; GCF_001883705.2, s__Burkholderia catarinensis, 95.0, 92.78, 0.756; GCF_902833225.1, s__Burkholderia sp902833225, 95.0, 92.49, 0.808; GCF_902499125.1, s__Burkholderia arboris, 95.0, 92.43, 0.814; GCF_01160…	94.32	11	N/A	N/A
ATCCBAA67_R9_Dorado_HAC_new	d__Bacteria;p__Pseudomonadota;c__Gammaproteobacteria;o__Burkholderiales;f__Burkholderiaceae;g__Burkholderia;s__Burkholderia stabilis	GCF_001742165.1	95	d__Bacteria;p__Pseudomonadota;c__Gammaproteobacteria;o__Burkholderiales;f__Burkholderiaceae;g__Burkholderia;s__Burkholderia stabilis	99.99	0.999	GCF_001742165.1	95	d__Bacteria;p__Pseudomonadota;c__Gammaproteobacteria;o__Burkholderiales;f__Burkholderiaceae;g__Burkholderia;s__Burkholderia stabilis	99.99	0.999	d__Bacteria;p__Pseudomonadota;c__Gammaproteobacteria;o__Burkholderiales;f__Burkholderiaceae;g__Burkholderia;s__	taxonomic classification defined by topology and ANI	topological placement and ANI have congruent species assignments	GCF_001028665.1, s__Burkholderia pyrrocinia, 95.0, 93.22, 0.772; GCF_003330765.1, s__Burkholderia pyrrocinia_B, 95.0, 92.99, 0.771; GCF_001039005.1, s__Burkholderia cepacia_C, 95.0, 92.98, 0.754; GCF_001883705.2, s__Burkholderia catarinensis, 95.0, 92.77, 0.755; GCF_902833225.1, s__Burkholderia sp902833225, 95.0, 92.49, 0.802; GCF_902499125.1, s__Burkholderia arboris, 95.0, 92.42, 0.815; GCF_0116…	96.07	11	N/A	N/A
ATCCBAA67_R9_Dorado_SUP_flye	d__Bacteria;p__Pseudomonadota;c__Gammaproteobacteria;o__Burkholderiales;f__Burkholderiaceae;g__Burkholderia;s__Burkholderia stabilis	GCF_001742165.1	95	d__Bacteria;p__Pseudomonadota;c__Gammaproteobacteria;o__Burkholderiales;f__Burkholderiaceae;g__Burkholderia;s__Burkholderia stabilis	99.99	0.998	GCF_001742165.1	95	d__Bacteria;p__Pseudomonadota;c__Gammaproteobacteria;o__Burkholderiales;f__Burkholderiaceae;g__Burkholderia;s__Burkholderia stabilis	99.99	0.998	d__Bacteria;p__Pseudomonadota;c__Gammaproteobacteria;o__Burkholderiales;f__Burkholderiaceae;g__Burkholderia;s__	taxonomic classification defined by topology and ANI	topological placement and ANI have congruent species assignments	GCF_001028665.1, s__Burkholderia pyrrocinia, 95.0, 93.24, 0.775; GCF_003330765.1, s__Burkholderia pyrrocinia_B, 95.0, 93.04, 0.766; GCF_001039005.1, s__Burkholderia cepacia_C, 95.0, 92.96, 0.755; GCF_001883705.2, s__Burkholderia catarinensis, 95.0, 92.79, 0.752; GCF_902833225.1, s__Burkholderia sp902833225, 95.0, 92.5, 0.811; GCF_902499125.1, s__Burkholderia arboris, 95.0, 92.46, 0.816; GCF_01160…	96.68	11	N/A	N/A
ATCCBAA67_R9_Dorado_SUP_new	d__Bacteria;p__Pseudomonadota;c__Gammaproteobacteria;o__Burkholderiales;f__Burkholderiaceae;g__Burkholderia;s__Burkholderia stabilis	GCF_001742165.1	95	d__Bacteria;p__Pseudomonadota;c__Gammaproteobacteria;o__Burkholderiales;f__Burkholderiaceae;g__Burkholderia;s__Burkholderia stabilis	99.99	0.998	GCF_001742165.1	95	d__Bacteria;p__Pseudomonadota;c__Gammaproteobacteria;o__Burkholderiales;f__Burkholderiaceae;g__Burkholderia;s__Burkholderia stabilis	99.99	0.998	d__Bacteria;p__Pseudomonadota;c__Gammaproteobacteria;o__Burkholderiales;f__Burkholderiaceae;g__Burkholderia;s__	taxonomic classification defined by topology and ANI	topological placement and ANI have congruent species assignments	GCF_001028665.1, s__Burkholderia pyrrocinia, 95.0, 93.27, 0.77; GCF_003330765.1, s__Burkholderia pyrrocinia_B, 95.0, 93.08, 0.767; GCF_001039005.1, s__Burkholderia cepacia_C, 95.0, 92.96, 0.751; GCF_001883705.2, s__Burkholderia catarinensis, 95.0, 92.79, 0.757; GCF_902833225.1, s__Burkholderia sp902833225, 95.0, 92.52, 0.805; GCF_902499125.1, s__Burkholderia arboris, 95.0, 92.43, 0.817; GCF_01160…	96.68	11	N/A	N/A
ATCCBAA67_R9_Guppy_FAST_flye	d__Bacteria;p__Pseudomonadota;c__Gammaproteobacteria;o__Burkholderiales;f__Burkholderiaceae;g__Burkholderia;s__Burkholderia stabilis	GCF_001742165.1	95	d__Bacteria;p__Pseudomonadota;c__Gammaproteobacteria;o__Burkholderiales;f__Burkholderiaceae;g__Burkholderia;s__Burkholderia stabilis	99.96	0.998	GCF_001742165.1	95	d__Bacteria;p__Pseudomonadota;c__Gammaproteobacteria;o__Burkholderiales;f__Burkholderiaceae;g__Burkholderia;s__Burkholderia stabilis	99.96	0.998	d__Bacteria;p__Pseudomonadota;c__Gammaproteobacteria;o__Burkholderiales;f__Burkholderiaceae;g__Burkholderia;s__	taxonomic classification defined by topology and ANI	topological placement and ANI have congruent species assignments	GCF_001028665.1, s__Burkholderia pyrrocinia, 95.0, 93.21, 0.775; GCF_003330765.1, s__Burkholderia pyrrocinia_B, 95.0, 93.0, 0.771; GCF_001039005.1, s__Burkholderia cepacia_C, 95.0, 92.95, 0.749; GCF_001883705.2, s__Burkholderia catarinensis, 95.0, 92.78, 0.756; GCF_902833225.1, s__Burkholderia sp902833225, 95.0, 92.52, 0.804; GCF_902499125.1, s__Burkholderia arboris, 95.0, 92.43, 0.817; GCF_01160…	93.33	11	N/A	N/A
ATCCBAA67_R9_Guppy_FAST_new	d__Bacteria;p__Pseudomonadota;c__Gammaproteobacteria;o__Burkholderiales;f__Burkholderiaceae;g__Burkholderia;s__Burkholderia stabilis	GCF_001742165.1	95	d__Bacteria;p__Pseudomonadota;c__Gammaproteobacteria;o__Burkholderiales;f__Burkholderiaceae;g__Burkholderia;s__Burkholderia stabilis	99.99	0.998	GCF_001742165.1	95	d__Bacteria;p__Pseudomonadota;c__Gammaproteobacteria;o__Burkholderiales;f__Burkholderiaceae;g__Burkholderia;s__Burkholderia stabilis	99.99	0.998	d__Bacteria;p__Pseudomonadota;c__Gammaproteobacteria;o__Burkholderiales;f__Burkholderiaceae;g__Burkholderia;s__	taxonomic classification defined by topology and ANI	topological placement and ANI have congruent species assignments	GCF_001028665.1, s__Burkholderia pyrrocinia, 95.0, 93.24, 0.766; GCF_003330765.1, s__Burkholderia pyrrocinia_B, 95.0, 93.03, 0.765; GCF_001039005.1, s__Burkholderia cepacia_C, 95.0, 92.97, 0.749; GCF_001883705.2, s__Burkholderia catarinensis, 95.0, 92.78, 0.754; GCF_902833225.1, s__Burkholderia sp902833225, 95.0, 92.52, 0.812; GCF_902499125.1, s__Burkholderia arboris, 95.0, 92.45, 0.815; GCF_0116…	96.58	11	N/A	N/A
ATCCBAA67_R9_Guppy_HAC_flye	d__Bacteria;p__Pseudomonadota;c__Gammaproteobacteria;o__Burkholderiales;f__Burkholderiaceae;g__Burkholderia;s__Burkholderia stabilis	GCF_001742165.1	95	d__Bacteria;p__Pseudomonadota;c__Gammaproteobacteria;o__Burkholderiales;f__Burkholderiaceae;g__Burkholderia;s__Burkholderia stabilis	99.98	0.999	GCF_001742165.1	95	d__Bacteria;p__Pseudomonadota;c__Gammaproteobacteria;o__Burkholderiales;f__Burkholderiaceae;g__Burkholderia;s__Burkholderia stabilis	99.98	0.999	d__Bacteria;p__Pseudomonadota;c__Gammaproteobacteria;o__Burkholderiales;f__Burkholderiaceae;g__Burkholderia;s__	taxonomic classification defined by topology and ANI	topological placement and ANI have congruent species assignments	GCF_001028665.1, s__Burkholderia pyrrocinia, 95.0, 93.26, 0.771; GCF_003330765.1, s__Burkholderia pyrrocinia_B, 95.0, 93.0, 0.765; GCF_001039005.1, s__Burkholderia cepacia_C, 95.0, 92.92, 0.754; GCF_001883705.2, s__Burkholderia catarinensis, 95.0, 92.76, 0.757; GCF_902833225.1, s__Burkholderia sp902833225, 95.0, 92.5, 0.813; GCF_011605345.1, s__Burkholderia sp011605345, 95.0, 92.44, 0.77; GCF_902…	94	11	N/A	N/A
ATCCBAA67_R9_Guppy_HAC_new	d__Bacteria;p__Pseudomonadota;c__Gammaproteobacteria;o__Burkholderiales;f__Burkholderiaceae;g__Burkholderia;s__Burkholderia stabilis	GCF_001742165.1	95	d__Bacteria;p__Pseudomonadota;c__Gammaproteobacteria;o__Burkholderiales;f__Burkholderiaceae;g__Burkholderia;s__Burkholderia stabilis	99.99	0.999	GCF_001742165.1	95	d__Bacteria;p__Pseudomonadota;c__Gammaproteobacteria;o__Burkholderiales;f__Burkholderiaceae;g__Burkholderia;s__Burkholderia stabilis	99.99	0.999	d__Bacteria;p__Pseudomonadota;c__Gammaproteobacteria;o__Burkholderiales;f__Burkholderiaceae;g__Burkholderia;s__	taxonomic classification defined by topology and ANI	topological placement and ANI have congruent species assignments	GCF_001028665.1, s__Burkholderia pyrrocinia, 95.0, 93.25, 0.772; GCF_003330765.1, s__Burkholderia pyrrocinia_B, 95.0, 93.04, 0.769; GCF_001039005.1, s__Burkholderia cepacia_C, 95.0, 92.98, 0.755; GCF_001883705.2, s__Burkholderia catarinensis, 95.0, 92.79, 0.754; GCF_902833225.1, s__Burkholderia sp902833225, 95.0, 92.52, 0.81; GCF_011605345.1, s__Burkholderia sp011605345, 95.0, 92.44, 0.769; GCF_9…	94.78	11	N/A	N/A
ATCCBAA67_R9_Guppy_SUP_flye	d__Bacteria;p__Pseudomonadota;c__Gammaproteobacteria;o__Burkholderiales;f__Burkholderiaceae;g__Burkholderia;s__Burkholderia stabilis	GCF_001742165.1	95	d__Bacteria;p__Pseudomonadota;c__Gammaproteobacteria;o__Burkholderiales;f__Burkholderiaceae;g__Burkholderia;s__Burkholderia stabilis	99.99	0.998	GCF_001742165.1	95	d__Bacteria;p__Pseudomonadota;c__Gammaproteobacteria;o__Burkholderiales;f__Burkholderiaceae;g__Burkholderia;s__Burkholderia stabilis	99.99	0.998	d__Bacteria;p__Pseudomonadota;c__Gammaproteobacteria;o__Burkholderiales;f__Burkholderiaceae;g__Burkholderia;s__	taxonomic classification defined by topology and ANI	topological placement and ANI have congruent species assignments	GCF_001028665.1, s__Burkholderia pyrrocinia, 95.0, 93.24, 0.775; GCF_003330765.1, s__Burkholderia pyrrocinia_B, 95.0, 93.05, 0.766; GCF_001039005.1, s__Burkholderia cepacia_C, 95.0, 92.96, 0.751; GCF_001883705.2, s__Burkholderia catarinensis, 95.0, 92.75, 0.756; GCF_902833225.1, s__Burkholderia sp902833225, 95.0, 92.5, 0.809; GCF_902499125.1, s__Burkholderia arboris, 95.0, 92.47, 0.817; GCF_01160…	96.7	11	N/A	N/A
ATCCBAA67_R9_Guppy_SUP_new	d__Bacteria;p__Pseudomonadota;c__Gammaproteobacteria;o__Burkholderiales;f__Burkholderiaceae;g__Burkholderia;s__Burkholderia stabilis	GCF_001742165.1	95	d__Bacteria;p__Pseudomonadota;c__Gammaproteobacteria;o__Burkholderiales;f__Burkholderiaceae;g__Burkholderia;s__Burkholderia stabilis	99.99	0.999	GCF_001742165.1	95	d__Bacteria;p__Pseudomonadota;c__Gammaproteobacteria;o__Burkholderiales;f__Burkholderiaceae;g__Burkholderia;s__Burkholderia stabilis	99.99	0.999	d__Bacteria;p__Pseudomonadota;c__Gammaproteobacteria;o__Burkholderiales;f__Burkholderiaceae;g__Burkholderia;s__	taxonomic classification defined by topology and ANI	topological placement and ANI have congruent species assignments	GCF_001028665.1, s__Burkholderia pyrrocinia, 95.0, 93.25, 0.771; GCF_003330765.1, s__Burkholderia pyrrocinia_B, 95.0, 93.04, 0.765; GCF_001039005.1, s__Burkholderia cepacia_C, 95.0, 92.97, 0.753; GCF_001883705.2, s__Burkholderia catarinensis, 95.0, 92.76, 0.753; GCF_902833225.1, s__Burkholderia sp902833225, 95.0, 92.52, 0.807; GCF_011605345.1, s__Burkholderia sp011605345, 95.0, 92.45, 0.77; GCF_9…	96.68	11	N/A	N/A
ATCCBAA67_illumina_new	d__Bacteria;p__Pseudomonadota;c__Gammaproteobacteria;o__Burkholderiales;f__Burkholderiaceae;g__Burkholderia;s__Burkholderia stabilis	GCF_001742165.1	95	d__Bacteria;p__Pseudomonadota;c__Gammaproteobacteria;o__Burkholderiales;f__Burkholderiaceae;g__Burkholderia;s__Burkholderia stabilis	99.99	0.976	GCF_001742165.1	95	d__Bacteria;p__Pseudomonadota;c__Gammaproteobacteria;o__Burkholderiales;f__Burkholderiaceae;g__Burkholderia;s__Burkholderia stabilis	99.99	0.976	d__Bacteria;p__Pseudomonadota;c__Gammaproteobacteria;o__Burkholderiales;f__Burkholderiaceae;g__Burkholderia;s__	taxonomic classification defined by topology and ANI	topological placement and ANI have congruent species assignments	GCF_001028665.1, s__Burkholderia pyrrocinia, 95.0, 93.29, 0.752; GCF_003330765.1, s__Burkholderia pyrrocinia_B, 95.0, 93.01, 0.754; GCF_001039005.1, s__Burkholderia cepacia_C, 95.0, 92.96, 0.755; GCF_001883705.2, s__Burkholderia catarinensis, 95.0, 92.83, 0.74; GCF_902833225.1, s__Burkholderia sp902833225, 95.0, 92.52, 0.797; GCF_011605345.1, s__Burkholderia sp011605345, 95.0, 92.49, 0.77; GCF_90…	96.68	11	N/A	N/A
ATCCBAA67_lrp_R10_Dorado_FAST_new	d__Bacteria;p__Pseudomonadota;c__Gammaproteobacteria;o__Burkholderiales;f__Burkholderiaceae;g__Burkholderia;s__Burkholderia stabilis	GCF_001742165.1	95	d__Bacteria;p__Pseudomonadota;c__Gammaproteobacteria;o__Burkholderiales;f__Burkholderiaceae;g__Burkholderia;s__Burkholderia stabilis	99.99	0.998	GCF_001742165.1	95	d__Bacteria;p__Pseudomonadota;c__Gammaproteobacteria;o__Burkholderiales;f__Burkholderiaceae;g__Burkholderia;s__Burkholderia stabilis	99.99	0.998	d__Bacteria;p__Pseudomonadota;c__Gammaproteobacteria;o__Burkholderiales;f__Burkholderiaceae;g__Burkholderia;s__	taxonomic classification defined by topology and ANI	topological placement and ANI have congruent species assignments	GCF_001028665.1, s__Burkholderia pyrrocinia, 95.0, 93.22, 0.767; GCF_003330765.1, s__Burkholderia pyrrocinia_B, 95.0, 93.02, 0.765; GCF_001039005.1, s__Burkholderia cepacia_C, 95.0, 92.95, 0.75; GCF_001883705.2, s__Burkholderia catarinensis, 95.0, 92.75, 0.751; GCF_902833225.1, s__Burkholderia sp902833225, 95.0, 92.54, 0.806; GCF_902499125.1, s__Burkholderia arboris, 95.0, 92.43, 0.814; GCF_01160…	96.54	11	N/A	N/A
ATCCBAA67_lrp_R10_Dorado_HAC_new	d__Bacteria;p__Pseudomonadota;c__Gammaproteobacteria;o__Burkholderiales;f__Burkholderiaceae;g__Burkholderia;s__Burkholderia stabilis	GCF_001742165.1	95	d__Bacteria;p__Pseudomonadota;c__Gammaproteobacteria;o__Burkholderiales;f__Burkholderiaceae;g__Burkholderia;s__Burkholderia stabilis	99.99	0.998	GCF_001742165.1	95	d__Bacteria;p__Pseudomonadota;c__Gammaproteobacteria;o__Burkholderiales;f__Burkholderiaceae;g__Burkholderia;s__Burkholderia stabilis	99.99	0.998	d__Bacteria;p__Pseudomonadota;c__Gammaproteobacteria;o__Burkholderiales;f__Burkholderiaceae;g__Burkholderia;s__	taxonomic classification defined by topology and ANI	topological placement and ANI have congruent species assignments	GCF_001028665.1, s__Burkholderia pyrrocinia, 95.0, 93.25, 0.766; GCF_003330765.1, s__Burkholderia pyrrocinia_B, 95.0, 93.04, 0.767; GCF_001039005.1, s__Burkholderia cepacia_C, 95.0, 92.94, 0.755; GCF_001883705.2, s__Burkholderia catarinensis, 95.0, 92.72, 0.757; GCF_902833225.1, s__Burkholderia sp902833225, 95.0, 92.54, 0.808; GCF_902499125.1, s__Burkholderia arboris, 95.0, 92.45, 0.813; GCF_0116…	96.54	11	N/A	N/A
ATCCBAA67_lrp_R10_Dorado_SUP_new	d__Bacteria;p__Pseudomonadota;c__Gammaproteobacteria;o__Burkholderiales;f__Burkholderiaceae;g__Burkholderia;s__Burkholderia stabilis	GCF_001742165.1	95	d__Bacteria;p__Pseudomonadota;c__Gammaproteobacteria;o__Burkholderiales;f__Burkholderiaceae;g__Burkholderia;s__Burkholderia stabilis	99.99	0.998	GCF_001742165.1	95	d__Bacteria;p__Pseudomonadota;c__Gammaproteobacteria;o__Burkholderiales;f__Burkholderiaceae;g__Burkholderia;s__Burkholderia stabilis	99.99	0.998	d__Bacteria;p__Pseudomonadota;c__Gammaproteobacteria;o__Burkholderiales;f__Burkholderiaceae;g__Burkholderia;s__	taxonomic classification defined by topology and ANI	topological placement and ANI have congruent species assignments	GCF_001028665.1, s__Burkholderia pyrrocinia, 95.0, 93.26, 0.765; GCF_003330765.1, s__Burkholderia pyrrocinia_B, 95.0, 93.03, 0.767; GCF_001039005.1, s__Burkholderia cepacia_C, 95.0, 92.95, 0.755; GCF_001883705.2, s__Burkholderia catarinensis, 95.0, 92.72, 0.757; GCF_902833225.1, s__Burkholderia sp902833225, 95.0, 92.54, 0.808; GCF_902499125.1, s__Burkholderia arboris, 95.0, 92.45, 0.813; GCF_0116…	96.54	11	N/A	N/A
ATCCBAA67_lrp_R10_Guppy_FAST_new	d__Bacteria;p__Pseudomonadota;c__Gammaproteobacteria;o__Burkholderiales;f__Burkholderiaceae;g__Burkholderia;s__Burkholderia stabilis	GCF_001742165.1	95	d__Bacteria;p__Pseudomonadota;c__Gammaproteobacteria;o__Burkholderiales;f__Burkholderiaceae;g__Burkholderia;s__Burkholderia stabilis	99.99	0.998	GCF_001742165.1	95	d__Bacteria;p__Pseudomonadota;c__Gammaproteobacteria;o__Burkholderiales;f__Burkholderiaceae;g__Burkholderia;s__Burkholderia stabilis	99.99	0.998	d__Bacteria;p__Pseudomonadota;c__Gammaproteobacteria;o__Burkholderiales;f__Burkholderiaceae;g__Burkholderia;s__	taxonomic classification defined by topology and ANI	topological placement and ANI have congruent species assignments	GCF_001028665.1, s__Burkholderia pyrrocinia, 95.0, 93.26, 0.765; GCF_003330765.1, s__Burkholderia pyrrocinia_B, 95.0, 93.03, 0.766; GCF_001039005.1, s__Burkholderia cepacia_C, 95.0, 92.95, 0.756; GCF_001883705.2, s__Burkholderia catarinensis, 95.0, 92.72, 0.757; GCF_902833225.1, s__Burkholderia sp902833225, 95.0, 92.54, 0.808; GCF_902499125.1, s__Burkholderia arboris, 95.0, 92.45, 0.813; GCF_0116…	96.54	11	N/A	N/A
ATCCBAA67_lrp_R10_Guppy_HAC_new	d__Bacteria;p__Pseudomonadota;c__Gammaproteobacteria;o__Burkholderiales;f__Burkholderiaceae;g__Burkholderia;s__Burkholderia stabilis	GCF_001742165.1	95	d__Bacteria;p__Pseudomonadota;c__Gammaproteobacteria;o__Burkholderiales;f__Burkholderiaceae;g__Burkholderia;s__Burkholderia stabilis	99.99	0.998	GCF_001742165.1	95	d__Bacteria;p__Pseudomonadota;c__Gammaproteobacteria;o__Burkholderiales;f__Burkholderiaceae;g__Burkholderia;s__Burkholderia stabilis	99.99	0.998	d__Bacteria;p__Pseudomonadota;c__Gammaproteobacteria;o__Burkholderiales;f__Burkholderiaceae;g__Burkholderia;s__	taxonomic classification defined by topology and ANI	topological placement and ANI have congruent species assignments	GCF_001028665.1, s__Burkholderia pyrrocinia, 95.0, 93.23, 0.766; GCF_003330765.1, s__Burkholderia pyrrocinia_B, 95.0, 92.99, 0.767; GCF_001039005.1, s__Burkholderia cepacia_C, 95.0, 92.96, 0.751; GCF_001883705.2, s__Burkholderia catarinensis, 95.0, 92.72, 0.753; GCF_902833225.1, s__Burkholderia sp902833225, 95.0, 92.55, 0.805; GCF_011605345.1, s__Burkholderia sp011605345, 95.0, 92.44, 0.77; GCF_9…	96.54	11	N/A	N/A
ATCCBAA67_lrp_R10_Guppy_SUP_new	d__Bacteria;p__Pseudomonadota;c__Gammaproteobacteria;o__Burkholderiales;f__Burkholderiaceae;g__Burkholderia;s__Burkholderia stabilis	GCF_001742165.1	95	d__Bacteria;p__Pseudomonadota;c__Gammaproteobacteria;o__Burkholderiales;f__Burkholderiaceae;g__Burkholderia;s__Burkholderia stabilis	99.99	0.998	GCF_001742165.1	95	d__Bacteria;p__Pseudomonadota;c__Gammaproteobacteria;o__Burkholderiales;f__Burkholderiaceae;g__Burkholderia;s__Burkholderia stabilis	99.99	0.998	d__Bacteria;p__Pseudomonadota;c__Gammaproteobacteria;o__Burkholderiales;f__Burkholderiaceae;g__Burkholderia;s__	taxonomic classification defined by topology and ANI	topological placement and ANI have congruent species assignments	GCF_001028665.1, s__Burkholderia pyrrocinia, 95.0, 93.26, 0.765; GCF_003330765.1, s__Burkholderia pyrrocinia_B, 95.0, 93.03, 0.767; GCF_001039005.1, s__Burkholderia cepacia_C, 95.0, 92.95, 0.755; GCF_001883705.2, s__Burkholderia catarinensis, 95.0, 92.72, 0.757; GCF_902833225.1, s__Burkholderia sp902833225, 95.0, 92.54, 0.808; GCF_902499125.1, s__Burkholderia arboris, 95.0, 92.45, 0.813; GCF_0116…	96.54	11	N/A	N/A
ATCCBAA67_lrp_R10_Rerio_SUP_new	d__Bacteria;p__Pseudomonadota;c__Gammaproteobacteria;o__Burkholderiales;f__Burkholderiaceae;g__Burkholderia;s__Burkholderia stabilis	GCF_001742165.1	95	d__Bacteria;p__Pseudomonadota;c__Gammaproteobacteria;o__Burkholderiales;f__Burkholderiaceae;g__Burkholderia;s__Burkholderia stabilis	99.99	0.998	GCF_001742165.1	95	d__Bacteria;p__Pseudomonadota;c__Gammaproteobacteria;o__Burkholderiales;f__Burkholderiaceae;g__Burkholderia;s__Burkholderia stabilis	99.99	0.998	d__Bacteria;p__Pseudomonadota;c__Gammaproteobacteria;o__Burkholderiales;f__Burkholderiaceae;g__Burkholderia;s__	taxonomic classification defined by topology and ANI	topological placement and ANI have congruent species assignments	GCF_001028665.1, s__Burkholderia pyrrocinia, 95.0, 93.26, 0.765; GCF_003330765.1, s__Burkholderia pyrrocinia_B, 95.0, 93.03, 0.767; GCF_001039005.1, s__Burkholderia cepacia_C, 95.0, 92.95, 0.755; GCF_001883705.2, s__Burkholderia catarinensis, 95.0, 92.72, 0.757; GCF_902833225.1, s__Burkholderia sp902833225, 95.0, 92.54, 0.808; GCF_902499125.1, s__Burkholderia arboris, 95.0, 92.45, 0.813; GCF_0116…	96.54	11	N/A	N/A
ATCCBAA67_lrp_R9_Dorado_FAST_new	d__Bacteria;p__Pseudomonadota;c__Gammaproteobacteria;o__Burkholderiales;f__Burkholderiaceae;g__Burkholderia;s__Burkholderia stabilis	GCF_001742165.1	95	d__Bacteria;p__Pseudomonadota;c__Gammaproteobacteria;o__Burkholderiales;f__Burkholderiaceae;g__Burkholderia;s__Burkholderia stabilis	99.99	0.998	GCF_001742165.1	95	d__Bacteria;p__Pseudomonadota;c__Gammaproteobacteria;o__Burkholderiales;f__Burkholderiaceae;g__Burkholderia;s__Burkholderia stabilis	99.99	0.998	d__Bacteria;p__Pseudomonadota;c__Gammaproteobacteria;o__Burkholderiales;f__Burkholderiaceae;g__Burkholderia;s__	taxonomic classification defined by topology and ANI	topological placement and ANI have congruent species assignments	GCF_001028665.1, s__Burkholderia pyrrocinia, 95.0, 93.26, 0.765; GCF_003330765.1, s__Burkholderia pyrrocinia_B, 95.0, 93.03, 0.767; GCF_001039005.1, s__Burkholderia cepacia_C, 95.0, 92.95, 0.755; GCF_001883705.2, s__Burkholderia catarinensis, 95.0, 92.72, 0.758; GCF_902833225.1, s__Burkholderia sp902833225, 95.0, 92.54, 0.808; GCF_902499125.1, s__Burkholderia arboris, 95.0, 92.45, 0.813; GCF_0116…	96.54	11	N/A	N/A
ATCCBAA67_lrp_R9_Dorado_HAC_new	d__Bacteria;p__Pseudomonadota;c__Gammaproteobacteria;o__Burkholderiales;f__Burkholderiaceae;g__Burkholderia;s__Burkholderia stabilis	GCF_001742165.1	95	d__Bacteria;p__Pseudomonadota;c__Gammaproteobacteria;o__Burkholderiales;f__Burkholderiaceae;g__Burkholderia;s__Burkholderia stabilis	99.99	0.998	GCF_001742165.1	95	d__Bacteria;p__Pseudomonadota;c__Gammaproteobacteria;o__Burkholderiales;f__Burkholderiaceae;g__Burkholderia;s__Burkholderia stabilis	99.99	0.998	d__Bacteria;p__Pseudomonadota;c__Gammaproteobacteria;o__Burkholderiales;f__Burkholderiaceae;g__Burkholderia;s__	taxonomic classification defined by topology and ANI	topological placement and ANI have congruent species assignments	GCF_001028665.1, s__Burkholderia pyrrocinia, 95.0, 93.26, 0.765; GCF_003330765.1, s__Burkholderia pyrrocinia_B, 95.0, 93.03, 0.767; GCF_001039005.1, s__Burkholderia cepacia_C, 95.0, 92.94, 0.755; GCF_001883705.2, s__Burkholderia catarinensis, 95.0, 92.72, 0.758; GCF_902833225.1, s__Burkholderia sp902833225, 95.0, 92.54, 0.808; GCF_902499125.1, s__Burkholderia arboris, 95.0, 92.45, 0.813; GCF_0116…	96.54	11	N/A	N/A
ATCCBAA67_lrp_R9_Dorado_SUP_new	d__Bacteria;p__Pseudomonadota;c__Gammaproteobacteria;o__Burkholderiales;f__Burkholderiaceae;g__Burkholderia;s__Burkholderia stabilis	GCF_001742165.1	95	d__Bacteria;p__Pseudomonadota;c__Gammaproteobacteria;o__Burkholderiales;f__Burkholderiaceae;g__Burkholderia;s__Burkholderia stabilis	99.99	0.998	GCF_001742165.1	95	d__Bacteria;p__Pseudomonadota;c__Gammaproteobacteria;o__Burkholderiales;f__Burkholderiaceae;g__Burkholderia;s__Burkholderia stabilis	99.99	0.998	d__Bacteria;p__Pseudomonadota;c__Gammaproteobacteria;o__Burkholderiales;f__Burkholderiaceae;g__Burkholderia;s__	taxonomic classification defined by topology and ANI	topological placement and ANI have congruent species assignments	GCF_001028665.1, s__Burkholderia pyrrocinia, 95.0, 93.26, 0.765; GCF_003330765.1, s__Burkholderia pyrrocinia_B, 95.0, 93.03, 0.767; GCF_001039005.1, s__Burkholderia cepacia_C, 95.0, 92.95, 0.755; GCF_001883705.2, s__Burkholderia catarinensis, 95.0, 92.73, 0.757; GCF_902833225.1, s__Burkholderia sp902833225, 95.0, 92.54, 0.808; GCF_902499125.1, s__Burkholderia arboris, 95.0, 92.45, 0.813; GCF_0116…	96.54	11	N/A	N/A
ATCCBAA67_lrp_R9_Guppy_FAST_new	d__Bacteria;p__Pseudomonadota;c__Gammaproteobacteria;o__Burkholderiales;f__Burkholderiaceae;g__Burkholderia;s__Burkholderia stabilis	GCF_001742165.1	95	d__Bacteria;p__Pseudomonadota;c__Gammaproteobacteria;o__Burkholderiales;f__Burkholderiaceae;g__Burkholderia;s__Burkholderia stabilis	99.99	0.998	GCF_001742165.1	95	d__Bacteria;p__Pseudomonadota;c__Gammaproteobacteria;o__Burkholderiales;f__Burkholderiaceae;g__Burkholderia;s__Burkholderia stabilis	99.99	0.998	d__Bacteria;p__Pseudomonadota;c__Gammaproteobacteria;o__Burkholderiales;f__Burkholderiaceae;g__Burkholderia;s__	taxonomic classification defined by topology and ANI	topological placement and ANI have congruent species assignments	GCF_001028665.1, s__Burkholderia pyrrocinia, 95.0, 93.26, 0.765; GCF_003330765.1, s__Burkholderia pyrrocinia_B, 95.0, 93.04, 0.766; GCF_001039005.1, s__Burkholderia cepacia_C, 95.0, 92.95, 0.755; GCF_001883705.2, s__Burkholderia catarinensis, 95.0, 92.74, 0.756; GCF_902833225.1, s__Burkholderia sp902833225, 95.0, 92.53, 0.808; GCF_902499125.1, s__Burkholderia arboris, 95.0, 92.45, 0.813; GCF_0116…	96.54	11	N/A	N/A
ATCCBAA67_lrp_R9_Guppy_HAC_new	d__Bacteria;p__Pseudomonadota;c__Gammaproteobacteria;o__Burkholderiales;f__Burkholderiaceae;g__Burkholderia;s__Burkholderia stabilis	GCF_001742165.1	95	d__Bacteria;p__Pseudomonadota;c__Gammaproteobacteria;o__Burkholderiales;f__Burkholderiaceae;g__Burkholderia;s__Burkholderia stabilis	99.99	0.998	GCF_001742165.1	95	d__Bacteria;p__Pseudomonadota;c__Gammaproteobacteria;o__Burkholderiales;f__Burkholderiaceae;g__Burkholderia;s__Burkholderia stabilis	99.99	0.998	d__Bacteria;p__Pseudomonadota;c__Gammaproteobacteria;o__Burkholderiales;f__Burkholderiaceae;g__Burkholderia;s__	taxonomic classification defined by topology and ANI	topological placement and ANI have congruent species assignments	GCF_001028665.1, s__Burkholderia pyrrocinia, 95.0, 93.26, 0.765; GCF_003330765.1, s__Burkholderia pyrrocinia_B, 95.0, 93.03, 0.767; GCF_001039005.1, s__Burkholderia cepacia_C, 95.0, 92.95, 0.755; GCF_001883705.2, s__Burkholderia catarinensis, 95.0, 92.72, 0.757; GCF_902833225.1, s__Burkholderia sp902833225, 95.0, 92.54, 0.808; GCF_902499125.1, s__Burkholderia arboris, 95.0, 92.45, 0.813; GCF_0116…	96.54	11	N/A	N/A
ATCCBAA67_lrp_R9_Guppy_SUP_new	d__Bacteria;p__Pseudomonadota;c__Gammaproteobacteria;o__Burkholderiales;f__Burkholderiaceae;g__Burkholderia;s__Burkholderia stabilis	GCF_001742165.1	95	d__Bacteria;p__Pseudomonadota;c__Gammaproteobacteria;o__Burkholderiales;f__Burkholderiaceae;g__Burkholderia;s__Burkholderia stabilis	99.99	0.998	GCF_001742165.1	95	d__Bacteria;p__Pseudomonadota;c__Gammaproteobacteria;o__Burkholderiales;f__Burkholderiaceae;g__Burkholderia;s__Burkholderia stabilis	99.99	0.998	d__Bacteria;p__Pseudomonadota;c__Gammaproteobacteria;o__Burkholderiales;f__Burkholderiaceae;g__Burkholderia;s__	taxonomic classification defined by topology and ANI	topological placement and ANI have congruent species assignments	GCF_001028665.1, s__Burkholderia pyrrocinia, 95.0, 93.26, 0.765; GCF_003330765.1, s__Burkholderia pyrrocinia_B, 95.0, 93.03, 0.767; GCF_001039005.1, s__Burkholderia cepacia_C, 95.0, 92.95, 0.755; GCF_001883705.2, s__Burkholderia catarinensis, 95.0, 92.73, 0.757; GCF_902833225.1, s__Burkholderia sp902833225, 95.0, 92.54, 0.808; GCF_902499125.1, s__Burkholderia arboris, 95.0, 92.45, 0.813; GCF_0116…	96.54	11	N/A	N/A
ATCCBAA67_srp_R10_Dorado_HAC_new	d__Bacteria;p__Pseudomonadota;c__Gammaproteobacteria;o__Burkholderiales;f__Burkholderiaceae;g__Burkholderia;s__Burkholderia stabilis	GCF_001742165.1	95	d__Bacteria;p__Pseudomonadota;c__Gammaproteobacteria;o__Burkholderiales;f__Burkholderiaceae;g__Burkholderia;s__Burkholderia stabilis	100	0.999	GCF_001742165.1	95	d__Bacteria;p__Pseudomonadota;c__Gammaproteobacteria;o__Burkholderiales;f__Burkholderiaceae;g__Burkholderia;s__Burkholderia stabilis	100	0.999	d__Bacteria;p__Pseudomonadota;c__Gammaproteobacteria;o__Burkholderiales;f__Burkholderiaceae;g__Burkholderia;s__	taxonomic classification defined by topology and ANI	topological placement and ANI have congruent species assignments	GCF_001028665.1, s__Burkholderia pyrrocinia, 95.0, 93.29, 0.771; GCF_003330765.1, s__Burkholderia pyrrocinia_B, 95.0, 93.05, 0.769; GCF_001039005.1, s__Burkholderia cepacia_C, 95.0, 92.99, 0.75; GCF_001883705.2, s__Burkholderia catarinensis, 95.0, 92.79, 0.757; GCF_902833225.1, s__Burkholderia sp902833225, 95.0, 92.57, 0.804; GCF_902499125.1, s__Burkholderia arboris, 95.0, 92.44, 0.818; GCF_01160…	51.16	11	N/A	Genome has more than 48.3% of markers with multiple hits
ATCCBAA67_srp_R10_Dorado_SUP_new	d__Bacteria;p__Pseudomonadota;c__Gammaproteobacteria;o__Burkholderiales;f__Burkholderiaceae;g__Burkholderia;s__Burkholderia stabilis	GCF_001742165.1	95	d__Bacteria;p__Pseudomonadota;c__Gammaproteobacteria;o__Burkholderiales;f__Burkholderiaceae;g__Burkholderia;s__Burkholderia stabilis	100	0.999	GCF_001742165.1	95	d__Bacteria;p__Pseudomonadota;c__Gammaproteobacteria;o__Burkholderiales;f__Burkholderiaceae;g__Burkholderia;s__Burkholderia stabilis	100	0.999	d__Bacteria;p__Pseudomonadota;c__Gammaproteobacteria;o__Burkholderiales;f__Burkholderiaceae;g__Burkholderia;s__	taxonomic classification defined by topology and ANI	topological placement and ANI have congruent species assignments	GCF_001028665.1, s__Burkholderia pyrrocinia, 95.0, 93.29, 0.765; GCF_001039005.1, s__Burkholderia cepacia_C, 95.0, 92.99, 0.752; GCF_003330765.1, s__Burkholderia pyrrocinia_B, 95.0, 92.97, 0.774; GCF_001883705.2, s__Burkholderia catarinensis, 95.0, 92.78, 0.755; GCF_902833225.1, s__Burkholderia sp902833225, 95.0, 92.48, 0.809; GCF_902499125.1, s__Burkholderia arboris, 95.0, 92.46, 0.817; GCF_0116…	39.62	11	N/A	Genome has more than 60.0% of markers with multiple hits
ATCCBAA67_srp_R10_Guppy_HAC_new	d__Bacteria;p__Pseudomonadota;c__Gammaproteobacteria;o__Burkholderiales;f__Burkholderiaceae;g__Burkholderia;s__Burkholderia stabilis	GCF_001742165.1	95	d__Bacteria;p__Pseudomonadota;c__Gammaproteobacteria;o__Burkholderiales;f__Burkholderiaceae;g__Burkholderia;s__Burkholderia stabilis	100	0.999	GCF_001742165.1	95	d__Bacteria;p__Pseudomonadota;c__Gammaproteobacteria;o__Burkholderiales;f__Burkholderiaceae;g__Burkholderia;s__Burkholderia stabilis	100	0.999	d__Bacteria;p__Pseudomonadota;c__Gammaproteobacteria;o__Burkholderiales;f__Burkholderiaceae;g__Burkholderia;s__	taxonomic classification defined by topology and ANI	topological placement and ANI have congruent species assignments	GCF_001028665.1, s__Burkholderia pyrrocinia, 95.0, 93.23, 0.767; GCF_001039005.1, s__Burkholderia cepacia_C, 95.0, 93.02, 0.748; GCF_003330765.1, s__Burkholderia pyrrocinia_B, 95.0, 93.01, 0.766; GCF_001883705.2, s__Burkholderia catarinensis, 95.0, 92.83, 0.752; GCF_902833225.1, s__Burkholderia sp902833225, 95.0, 92.46, 0.808; GCF_902499125.1, s__Burkholderia arboris, 95.0, 92.45, 0.816; GCF_0116…	30.39	11	N/A	Genome has more than 69.2% of markers with multiple hits
ATCCBAA67_srp_R10_Guppy_SUP_new	d__Bacteria;p__Pseudomonadota;c__Gammaproteobacteria;o__Burkholderiales;f__Burkholderiaceae;g__Burkholderia;s__Burkholderia stabilis	GCF_001742165.1	95	d__Bacteria;p__Pseudomonadota;c__Gammaproteobacteria;o__Burkholderiales;f__Burkholderiaceae;g__Burkholderia;s__Burkholderia stabilis	100	0.998	GCF_001742165.1	95	d__Bacteria;p__Pseudomonadota;c__Gammaproteobacteria;o__Burkholderiales;f__Burkholderiaceae;g__Burkholderia;s__Burkholderia stabilis	100	0.998	d__Bacteria;p__Pseudomonadota;c__Gammaproteobacteria;o__Burkholderiales;f__Burkholderiaceae;g__Burkholderia;s__	taxonomic classification defined by topology and ANI	topological placement and ANI have congruent species assignments	GCF_001028665.1, s__Burkholderia pyrrocinia, 95.0, 93.25, 0.767; GCF_003330765.1, s__Burkholderia pyrrocinia_B, 95.0, 93.03, 0.767; GCF_001039005.1, s__Burkholderia cepacia_C, 95.0, 92.98, 0.754; GCF_001883705.2, s__Burkholderia catarinensis, 95.0, 92.77, 0.76; GCF_902833225.1, s__Burkholderia sp902833225, 95.0, 92.52, 0.815; GCF_902499125.1, s__Burkholderia arboris, 95.0, 92.48, 0.822; GCF_01160…	32.89	11	N/A	Genome has more than 66.7% of markers with multiple hits
ATCCBAA67_srp_R10_Rerio_SUP_new	d__Bacteria;p__Pseudomonadota;c__Gammaproteobacteria;o__Burkholderiales;f__Burkholderiaceae;g__Burkholderia;s__Burkholderia stabilis	GCF_001742165.1	95	d__Bacteria;p__Pseudomonadota;c__Gammaproteobacteria;o__Burkholderiales;f__Burkholderiaceae;g__Burkholderia;s__Burkholderia stabilis	99.99	0.999	GCF_001742165.1	95	d__Bacteria;p__Pseudomonadota;c__Gammaproteobacteria;o__Burkholderiales;f__Burkholderiaceae;g__Burkholderia;s__Burkholderia stabilis	99.99	0.999	d__Bacteria;p__Pseudomonadota;c__Gammaproteobacteria;o__Burkholderiales;f__Burkholderiaceae;g__Burkholderia;s__	taxonomic classification defined by topology and ANI	topological placement and ANI have congruent species assignments	GCF_001028665.1, s__Burkholderia pyrrocinia, 95.0, 93.25, 0.772; GCF_003330765.1, s__Burkholderia pyrrocinia_B, 95.0, 93.06, 0.767; GCF_001039005.1, s__Burkholderia cepacia_C, 95.0, 92.98, 0.753; GCF_001883705.2, s__Burkholderia catarinensis, 95.0, 92.79, 0.752; GCF_902833225.1, s__Burkholderia sp902833225, 95.0, 92.5, 0.806; GCF_011605345.1, s__Burkholderia sp011605345, 95.0, 92.43, 0.771; GCF_9…	44.55	11	N/A	Genome has more than 55.0% of markers with multiple hits
ATCCBAA67_srp_R9_Dorado_FAST_new	d__Bacteria;p__Pseudomonadota;c__Gammaproteobacteria;o__Burkholderiales;f__Burkholderiaceae;g__Burkholderia;s__Burkholderia stabilis	GCF_001742165.1	95	d__Bacteria;p__Pseudomonadota;c__Gammaproteobacteria;o__Burkholderiales;f__Burkholderiaceae;g__Burkholderia;s__Burkholderia stabilis	100	0.998	GCF_001742165.1	95	d__Bacteria;p__Pseudomonadota;c__Gammaproteobacteria;o__Burkholderiales;f__Burkholderiaceae;g__Burkholderia;s__Burkholderia stabilis	100	0.998	d__Bacteria;p__Pseudomonadota;c__Gammaproteobacteria;o__Burkholderiales;f__Burkholderiaceae;g__Burkholderia;s__	taxonomic classification defined by topology and ANI	topological placement and ANI have congruent species assignments	GCF_001028665.1, s__Burkholderia pyrrocinia, 95.0, 93.23, 0.768; GCF_003330765.1, s__Burkholderia pyrrocinia_B, 95.0, 93.05, 0.768; GCF_001039005.1, s__Burkholderia cepacia_C, 95.0, 92.95, 0.754; GCF_001883705.2, s__Burkholderia catarinensis, 95.0, 92.81, 0.756; GCF_902833225.1, s__Burkholderia sp902833225, 95.0, 92.5, 0.806; GCF_011605345.1, s__Burkholderia sp011605345, 95.0, 92.43, 0.769; GCF_9…	96.68	11	N/A	N/A
ATCCBAA67_srp_R9_Dorado_HAC_new	d__Bacteria;p__Pseudomonadota;c__Gammaproteobacteria;o__Burkholderiales;f__Burkholderiaceae;g__Burkholderia;s__Burkholderia stabilis	GCF_001742165.1	95	d__Bacteria;p__Pseudomonadota;c__Gammaproteobacteria;o__Burkholderiales;f__Burkholderiaceae;g__Burkholderia;s__Burkholderia stabilis	100	0.999	GCF_001742165.1	95	d__Bacteria;p__Pseudomonadota;c__Gammaproteobacteria;o__Burkholderiales;f__Burkholderiaceae;g__Burkholderia;s__Burkholderia stabilis	100	0.999	d__Bacteria;p__Pseudomonadota;c__Gammaproteobacteria;o__Burkholderiales;f__Burkholderiaceae;g__Burkholderia;s__	taxonomic classification defined by topology and ANI	topological placement and ANI have congruent species assignments	GCF_001028665.1, s__Burkholderia pyrrocinia, 95.0, 93.21, 0.771; GCF_001039005.1, s__Burkholderia cepacia_C, 95.0, 92.99, 0.754; GCF_003330765.1, s__Burkholderia pyrrocinia_B, 95.0, 92.99, 0.773; GCF_001883705.2, s__Burkholderia catarinensis, 95.0, 92.76, 0.756; GCF_902833225.1, s__Burkholderia sp902833225, 95.0, 92.48, 0.804; GCF_902499125.1, s__Burkholderia arboris, 95.0, 92.42, 0.814; GCF_0116…	96.68	11	N/A	N/A
ATCCBAA67_srp_R9_Dorado_SUP_new	d__Bacteria;p__Pseudomonadota;c__Gammaproteobacteria;o__Burkholderiales;f__Burkholderiaceae;g__Burkholderia;s__Burkholderia stabilis	GCF_001742165.1	95	d__Bacteria;p__Pseudomonadota;c__Gammaproteobacteria;o__Burkholderiales;f__Burkholderiaceae;g__Burkholderia;s__Burkholderia stabilis	100	0.998	GCF_001742165.1	95	d__Bacteria;p__Pseudomonadota;c__Gammaproteobacteria;o__Burkholderiales;f__Burkholderiaceae;g__Burkholderia;s__Burkholderia stabilis	100	0.998	d__Bacteria;p__Pseudomonadota;c__Gammaproteobacteria;o__Burkholderiales;f__Burkholderiaceae;g__Burkholderia;s__	taxonomic classification defined by topology and ANI	topological placement and ANI have congruent species assignments	GCF_001028665.1, s__Burkholderia pyrrocinia, 95.0, 93.27, 0.77; GCF_003330765.1, s__Burkholderia pyrrocinia_B, 95.0, 93.08, 0.768; GCF_001039005.1, s__Burkholderia cepacia_C, 95.0, 92.97, 0.751; GCF_001883705.2, s__Burkholderia catarinensis, 95.0, 92.8, 0.755; GCF_902833225.1, s__Burkholderia sp902833225, 95.0, 92.51, 0.805; GCF_902499125.1, s__Burkholderia arboris, 95.0, 92.43, 0.816; GCF_011605…	96.68	11	N/A	N/A
ATCCBAA67_srp_R9_Guppy_FAST_new	d__Bacteria;p__Pseudomonadota;c__Gammaproteobacteria;o__Burkholderiales;f__Burkholderiaceae;g__Burkholderia;s__Burkholderia stabilis	GCF_001742165.1	95	d__Bacteria;p__Pseudomonadota;c__Gammaproteobacteria;o__Burkholderiales;f__Burkholderiaceae;g__Burkholderia;s__Burkholderia stabilis	100	0.998	GCF_001742165.1	95	d__Bacteria;p__Pseudomonadota;c__Gammaproteobacteria;o__Burkholderiales;f__Burkholderiaceae;g__Burkholderia;s__Burkholderia stabilis	100	0.998	d__Bacteria;p__Pseudomonadota;c__Gammaproteobacteria;o__Burkholderiales;f__Burkholderiaceae;g__Burkholderia;s__	taxonomic classification defined by topology and ANI	topological placement and ANI have congruent species assignments	GCF_001028665.1, s__Burkholderia pyrrocinia, 95.0, 93.23, 0.766; GCF_003330765.1, s__Burkholderia pyrrocinia_B, 95.0, 93.03, 0.766; GCF_001039005.1, s__Burkholderia cepacia_C, 95.0, 92.97, 0.749; GCF_001883705.2, s__Burkholderia catarinensis, 95.0, 92.79, 0.754; GCF_902833225.1, s__Burkholderia sp902833225, 95.0, 92.52, 0.811; GCF_902499125.1, s__Burkholderia arboris, 95.0, 92.44, 0.816; GCF_0116…	96.68	11	N/A	N/A
ATCCBAA67_srp_R9_Guppy_HAC_new	d__Bacteria;p__Pseudomonadota;c__Gammaproteobacteria;o__Burkholderiales;f__Burkholderiaceae;g__Burkholderia;s__Burkholderia stabilis	GCF_001742165.1	95	d__Bacteria;p__Pseudomonadota;c__Gammaproteobacteria;o__Burkholderiales;f__Burkholderiaceae;g__Burkholderia;s__Burkholderia stabilis	100	0.999	GCF_001742165.1	95	d__Bacteria;p__Pseudomonadota;c__Gammaproteobacteria;o__Burkholderiales;f__Burkholderiaceae;g__Burkholderia;s__Burkholderia stabilis	100	0.999	d__Bacteria;p__Pseudomonadota;c__Gammaproteobacteria;o__Burkholderiales;f__Burkholderiaceae;g__Burkholderia;s__	taxonomic classification defined by topology and ANI	topological placement and ANI have congruent species assignments	GCF_001028665.1, s__Burkholderia pyrrocinia, 95.0, 93.24, 0.772; GCF_003330765.1, s__Burkholderia pyrrocinia_B, 95.0, 93.01, 0.771; GCF_001039005.1, s__Burkholderia cepacia_C, 95.0, 92.97, 0.755; GCF_001883705.2, s__Burkholderia catarinensis, 95.0, 92.82, 0.752; GCF_902833225.1, s__Burkholderia sp902833225, 95.0, 92.51, 0.811; GCF_011605345.1, s__Burkholderia sp011605345, 95.0, 92.45, 0.77; GCF_9…	96.68	11	N/A	N/A
ATCCBAA67_srp_R9_Guppy_SUP_new	d__Bacteria;p__Pseudomonadota;c__Gammaproteobacteria;o__Burkholderiales;f__Burkholderiaceae;g__Burkholderia;s__Burkholderia stabilis	GCF_001742165.1	95	d__Bacteria;p__Pseudomonadota;c__Gammaproteobacteria;o__Burkholderiales;f__Burkholderiaceae;g__Burkholderia;s__Burkholderia stabilis	99.99	0.999	GCF_001742165.1	95	d__Bacteria;p__Pseudomonadota;c__Gammaproteobacteria;o__Burkholderiales;f__Burkholderiaceae;g__Burkholderia;s__Burkholderia stabilis	99.99	0.999	d__Bacteria;p__Pseudomonadota;c__Gammaproteobacteria;o__Burkholderiales;f__Burkholderiaceae;g__Burkholderia;s__	taxonomic classification defined by topology and ANI	topological placement and ANI have congruent species assignments	GCF_001028665.1, s__Burkholderia pyrrocinia, 95.0, 93.25, 0.771; GCF_003330765.1, s__Burkholderia pyrrocinia_B, 95.0, 93.04, 0.766; GCF_001039005.1, s__Burkholderia cepacia_C, 95.0, 92.96, 0.754; GCF_001883705.2, s__Burkholderia catarinensis, 95.0, 92.75, 0.753; GCF_902833225.1, s__Burkholderia sp902833225, 95.0, 92.52, 0.807; GCF_011605345.1, s__Burkholderia sp011605345, 95.0, 92.45, 0.771; GCF_…	96.68	11	N/A	N/A
GCF_001742165.1_ASM174216v1_genomic_new	d__Bacteria;p__Pseudomonadota;c__Gammaproteobacteria;o__Burkholderiales;f__Burkholderiaceae;g__Burkholderia;s__Burkholderia stabilis	GCF_001742165.1	95	d__Bacteria;p__Pseudomonadota;c__Gammaproteobacteria;o__Burkholderiales;f__Burkholderiaceae;g__Burkholderia;s__Burkholderia stabilis	100	0.999	GCF_001742165.1	95	d__Bacteria;p__Pseudomonadota;c__Gammaproteobacteria;o__Burkholderiales;f__Burkholderiaceae;g__Burkholderia;s__Burkholderia stabilis	100	0.999	d__Bacteria;p__Pseudomonadota;c__Gammaproteobacteria;o__Burkholderiales;f__Burkholderiaceae;g__Burkholderia;s__	taxonomic classification defined by topology and ANI	topological placement and ANI have congruent species assignments	GCF_001028665.1, s__Burkholderia pyrrocinia, 95.0, 93.28, 0.758; GCF_001039005.1, s__Burkholderia cepacia_C, 95.0, 93.07, 0.755; GCF_003330765.1, s__Burkholderia pyrrocinia_B, 95.0, 93.01, 0.769; GCF_001883705.2, s__Burkholderia catarinensis, 95.0, 92.72, 0.757; GCF_902833225.1, s__Burkholderia sp902833225, 95.0, 92.51, 0.814; GCF_011605345.1, s__Burkholderia sp011605345, 95.0, 92.46, 0.775; GCF_…	96.6	11	N/A	N/A
ATCCBAA67_R10_Dorado_FAST_new	Unclassified Bacteria	N/A	N/A	N/A	N/A	N/A	N/A	N/A	N/A	N/A	N/A	N/A	N/A	N/A	N/A	N/A	N/A	N/A	Insufficient number of amino acids in MSA (7.3%)
ATCCBAA67_R10_Guppy_FAST_new	Unclassified Bacteria	N/A	N/A	N/A	N/A	N/A	N/A	N/A	N/A	N/A	N/A	N/A	N/A	N/A	N/A	N/A	N/A	N/A	Insufficient number of amino acids in MSA (5.7%)
ATCCBAA67_srp_R10_Dorado_FAST_new	Unclassified Bacteria	N/A	N/A	N/A	N/A	N/A	N/A	N/A	N/A	N/A	N/A	N/A	N/A	N/A	N/A	N/A	N/A	N/A	Insufficient number of amino acids in MSA (6.4%)
ATCCBAA67_srp_R10_Guppy_FAST_new	Unclassified Bacteria	N/A	N/A	N/A	N/A	N/A	N/A	N/A	N/A	N/A	N/A	N/A	N/A	N/A	N/A	N/A	N/A	N/A	Insufficient number of amino acids in MSA (5.7%)

## Sheet: camjej
user_genome	classification	fastani_reference	fastani_reference_radius	fastani_taxonomy	fastani_ani	fastani_af	closest_placement_reference	closest_placement_radius	closest_placement_taxonomy	closest_placement_ani	closest_placement_af	pplacer_taxonomy	classification_method	note	other_related_references(genome_id,species_name,radius,ANI,AF)	msa_percent	translation_table	red_value	warnings
ATCC29428_R10_Dorado_FAST_flye	d__Bacteria;p__Campylobacterota;c__Campylobacteria;o__Campylobacterales;f__Campylobacteraceae;g__Campylobacter_D;s__Campylobacter_D jejuni	GCF_001457695.1	95	d__Bacteria;p__Campylobacterota;c__Campylobacteria;o__Campylobacterales;f__Campylobacteraceae;g__Campylobacter_D;s__Campylobacter_D jejuni	97.42	0.904	GCF_001457695.1	95	d__Bacteria;p__Campylobacterota;c__Campylobacteria;o__Campylobacterales;f__Campylobacteraceae;g__Campylobacter_D;s__Campylobacter_D jejuni	97.42	0.904	d__Bacteria;p__Campylobacterota;c__Campylobacteria;o__Campylobacterales;f__Campylobacteraceae;g__Campylobacter_D;s__	taxonomic classification defined by topology and ANI	topological placement and ANI have congruent species assignments	GCA_014305285.1, s__Campylobacter_D jejuni_D, 95.0, 94.36, 0.912; GCA_000163995.1, s__Campylobacter_D jejuni_A, 95.0, 90.96, 0.87; GCF_000254135.1, s__Campylobacter_D coli, 95.0, 86.09, 0.805; GCF_001687475.2, s__Campylobacter_D hepaticus, 95.0, 83.83, 0.816; GCF_001492295.1, s__Campylobacter_D coli_B, 95.0, 83.79, 0.8; GCF_016806695.1, s__Campylobacter_D bilis, 95.0, 83.51, 0.886; GCF_000470055.…	48.68	11	N/A	N/A
ATCC29428_R10_Dorado_FAST_medaka_2_0	d__Bacteria;p__Campylobacterota;c__Campylobacteria;o__Campylobacterales;f__Campylobacteraceae;g__Campylobacter_D;s__Campylobacter_D jejuni	GCF_001457695.1	95	d__Bacteria;p__Campylobacterota;c__Campylobacteria;o__Campylobacterales;f__Campylobacteraceae;g__Campylobacter_D;s__Campylobacter_D jejuni	97.47	0.906	GCF_001457695.1	95	d__Bacteria;p__Campylobacterota;c__Campylobacteria;o__Campylobacterales;f__Campylobacteraceae;g__Campylobacter_D;s__Campylobacter_D jejuni	97.47	0.906	d__Bacteria;p__Campylobacterota;c__Campylobacteria;o__Campylobacterales;f__Campylobacteraceae;g__Campylobacter_D;s__	taxonomic classification defined by topology and ANI	topological placement and ANI have congruent species assignments	GCA_014305285.1, s__Campylobacter_D jejuni_D, 95.0, 94.41, 0.914; GCA_000163995.1, s__Campylobacter_D jejuni_A, 95.0, 91.03, 0.873; GCF_000254135.1, s__Campylobacter_D coli, 95.0, 86.09, 0.796; GCF_001492295.1, s__Campylobacter_D coli_B, 95.0, 83.99, 0.793; GCF_001687475.2, s__Campylobacter_D hepaticus, 95.0, 83.87, 0.816; GCF_016806695.1, s__Campylobacter_D bilis, 95.0, 83.52, 0.89; GCF_00047005…	58.29	11	N/A	N/A
ATCC29428_R10_Dorado_HAC_flye	d__Bacteria;p__Campylobacterota;c__Campylobacteria;o__Campylobacterales;f__Campylobacteraceae;g__Campylobacter_D;s__Campylobacter_D jejuni	GCF_001457695.1	95	d__Bacteria;p__Campylobacterota;c__Campylobacteria;o__Campylobacterales;f__Campylobacteraceae;g__Campylobacter_D;s__Campylobacter_D jejuni	97.53	0.904	GCF_001457695.1	95	d__Bacteria;p__Campylobacterota;c__Campylobacteria;o__Campylobacterales;f__Campylobacteraceae;g__Campylobacter_D;s__Campylobacter_D jejuni	97.53	0.904	d__Bacteria;p__Campylobacterota;c__Campylobacteria;o__Campylobacterales;f__Campylobacteraceae;g__Campylobacter_D;s__	taxonomic classification defined by topology and ANI	topological placement and ANI have congruent species assignments	GCA_014305285.1, s__Campylobacter_D jejuni_D, 95.0, 94.4, 0.896; GCA_000163995.1, s__Campylobacter_D jejuni_A, 95.0, 90.99, 0.877; GCF_000254135.1, s__Campylobacter_D coli, 95.0, 86.11, 0.797; GCF_001687475.2, s__Campylobacter_D hepaticus, 95.0, 84.05, 0.802; GCF_001492295.1, s__Campylobacter_D coli_B, 95.0, 83.97, 0.792; GCF_016806695.1, s__Campylobacter_D bilis, 95.0, 83.68, 0.873; GCF_00047005…	78.77	11	N/A	N/A
ATCC29428_R10_Dorado_HAC_medaka_2_0	d__Bacteria;p__Campylobacterota;c__Campylobacteria;o__Campylobacterales;f__Campylobacteraceae;g__Campylobacter_D;s__Campylobacter_D jejuni	GCF_001457695.1	95	d__Bacteria;p__Campylobacterota;c__Campylobacteria;o__Campylobacterales;f__Campylobacteraceae;g__Campylobacter_D;s__Campylobacter_D jejuni	97.55	0.904	GCF_001457695.1	95	d__Bacteria;p__Campylobacterota;c__Campylobacteria;o__Campylobacterales;f__Campylobacteraceae;g__Campylobacter_D;s__Campylobacter_D jejuni	97.55	0.904	d__Bacteria;p__Campylobacterota;c__Campylobacteria;o__Campylobacterales;f__Campylobacteraceae;g__Campylobacter_D;s__	taxonomic classification defined by topology and ANI	topological placement and ANI have congruent species assignments	GCA_014305285.1, s__Campylobacter_D jejuni_D, 95.0, 94.41, 0.897; GCA_000163995.1, s__Campylobacter_D jejuni_A, 95.0, 91.02, 0.872; GCF_000254135.1, s__Campylobacter_D coli, 95.0, 86.11, 0.803; GCF_001687475.2, s__Campylobacter_D hepaticus, 95.0, 84.04, 0.796; GCF_001492295.1, s__Campylobacter_D coli_B, 95.0, 83.99, 0.788; GCF_016806695.1, s__Campylobacter_D bilis, 95.0, 83.69, 0.873; GCF_0004700…	78.97	11	N/A	N/A
ATCC29428_R10_Dorado_SUP_flye	d__Bacteria;p__Campylobacterota;c__Campylobacteria;o__Campylobacterales;f__Campylobacteraceae;g__Campylobacter_D;s__Campylobacter_D jejuni	GCF_001457695.1	95	d__Bacteria;p__Campylobacterota;c__Campylobacteria;o__Campylobacterales;f__Campylobacteraceae;g__Campylobacter_D;s__Campylobacter_D jejuni	97.53	0.909	GCF_001457695.1	95	d__Bacteria;p__Campylobacterota;c__Campylobacteria;o__Campylobacterales;f__Campylobacteraceae;g__Campylobacter_D;s__Campylobacter_D jejuni	97.53	0.909	d__Bacteria;p__Campylobacterota;c__Campylobacteria;o__Campylobacterales;f__Campylobacteraceae;g__Campylobacter_D;s__	taxonomic classification defined by topology and ANI	topological placement and ANI have congruent species assignments	GCA_014305285.1, s__Campylobacter_D jejuni_D, 95.0, 94.47, 0.903; GCA_000163995.1, s__Campylobacter_D jejuni_A, 95.0, 91.11, 0.865; GCF_000254135.1, s__Campylobacter_D coli, 95.0, 86.05, 0.807; GCF_001492295.1, s__Campylobacter_D coli_B, 95.0, 84.03, 0.781; GCF_001687475.2, s__Campylobacter_D hepaticus, 95.0, 83.98, 0.812; GCF_000470055.1, s__Campylobacter_D coli_A, 95.0, 83.64, 0.816; GCF_016806…	82.9	11	N/A	N/A
ATCC29428_R10_Dorado_SUP_medaka_2_0	d__Bacteria;p__Campylobacterota;c__Campylobacteria;o__Campylobacterales;f__Campylobacteraceae;g__Campylobacter_D;s__Campylobacter_D jejuni	GCF_001457695.1	95	d__Bacteria;p__Campylobacterota;c__Campylobacteria;o__Campylobacterales;f__Campylobacteraceae;g__Campylobacter_D;s__Campylobacter_D jejuni	97.55	0.907	GCF_001457695.1	95	d__Bacteria;p__Campylobacterota;c__Campylobacteria;o__Campylobacterales;f__Campylobacteraceae;g__Campylobacter_D;s__Campylobacter_D jejuni	97.55	0.907	d__Bacteria;p__Campylobacterota;c__Campylobacteria;o__Campylobacterales;f__Campylobacteraceae;g__Campylobacter_D;s__	taxonomic classification defined by topology and ANI	topological placement and ANI have congruent species assignments	GCA_014305285.1, s__Campylobacter_D jejuni_D, 95.0, 94.46, 0.903; GCA_000163995.1, s__Campylobacter_D jejuni_A, 95.0, 91.13, 0.867; GCF_000254135.1, s__Campylobacter_D coli, 95.0, 86.12, 0.807; GCF_001492295.1, s__Campylobacter_D coli_B, 95.0, 84.06, 0.781; GCF_001687475.2, s__Campylobacter_D hepaticus, 95.0, 83.99, 0.812; GCF_016806695.1, s__Campylobacter_D bilis, 95.0, 83.65, 0.886; GCF_0004700…	83.59	11	N/A	N/A
ATCC29428_R10_Guppy_FAST_flye	d__Bacteria;p__Campylobacterota;c__Campylobacteria;o__Campylobacterales;f__Campylobacteraceae;g__Campylobacter_D;s__Campylobacter_D jejuni	GCF_001457695.1	95	d__Bacteria;p__Campylobacterota;c__Campylobacteria;o__Campylobacterales;f__Campylobacteraceae;g__Campylobacter_D;s__Campylobacter_D jejuni	97.39	0.92	GCF_001457695.1	95	d__Bacteria;p__Campylobacterota;c__Campylobacteria;o__Campylobacterales;f__Campylobacteraceae;g__Campylobacter_D;s__Campylobacter_D jejuni	97.39	0.92	d__Bacteria;p__Campylobacterota;c__Campylobacteria;o__Campylobacterales;f__Campylobacteraceae;g__Campylobacter_D;s__	taxonomic classification defined by topology and ANI	topological placement and ANI have congruent species assignments	GCA_014305285.1, s__Campylobacter_D jejuni_D, 95.0, 94.2, 0.914; GCA_000163995.1, s__Campylobacter_D jejuni_A, 95.0, 90.97, 0.865; GCF_000254135.1, s__Campylobacter_D coli, 95.0, 86.1, 0.799; GCF_001492295.1, s__Campylobacter_D coli_B, 95.0, 83.98, 0.781; GCF_001687475.2, s__Campylobacter_D hepaticus, 95.0, 83.95, 0.798; GCF_000470055.1, s__Campylobacter_D coli_A, 95.0, 83.59, 0.835; GCF_01680669…	43.89	11	N/A	N/A
ATCC29428_R10_Guppy_FAST_medaka_2_0	d__Bacteria;p__Campylobacterota;c__Campylobacteria;o__Campylobacterales;f__Campylobacteraceae;g__Campylobacter_D;s__Campylobacter_D jejuni	GCF_001457695.1	95	d__Bacteria;p__Campylobacterota;c__Campylobacteria;o__Campylobacterales;f__Campylobacteraceae;g__Campylobacter_D;s__Campylobacter_D jejuni	97.48	0.925	GCF_001457695.1	95	d__Bacteria;p__Campylobacterota;c__Campylobacteria;o__Campylobacterales;f__Campylobacteraceae;g__Campylobacter_D;s__Campylobacter_D jejuni	97.48	0.925	d__Bacteria;p__Campylobacterota;c__Campylobacteria;o__Campylobacterales;f__Campylobacteraceae;g__Campylobacter_D;s__	taxonomic classification defined by topology and ANI	topological placement and ANI have congruent species assignments	GCA_014305285.1, s__Campylobacter_D jejuni_D, 95.0, 94.31, 0.905; GCA_000163995.1, s__Campylobacter_D jejuni_A, 95.0, 90.99, 0.87; GCF_000254135.1, s__Campylobacter_D coli, 95.0, 86.02, 0.803; GCF_001492295.1, s__Campylobacter_D coli_B, 95.0, 83.96, 0.783; GCF_001687475.2, s__Campylobacter_D hepaticus, 95.0, 83.96, 0.8; GCF_016806695.1, s__Campylobacter_D bilis, 95.0, 83.7, 0.877; GCF_000470055.1…	55.85	11	N/A	N/A
ATCC29428_R10_Guppy_FAST_new	d__Bacteria;p__Campylobacterota;c__Campylobacteria;o__Campylobacterales;f__Campylobacteraceae;g__Campylobacter_D;s__Campylobacter_D jejuni	GCF_001457695.1	95	d__Bacteria;p__Campylobacterota;c__Campylobacteria;o__Campylobacterales;f__Campylobacteraceae;g__Campylobacter_D;s__Campylobacter_D jejuni	97.52	0.909	GCF_001457695.1	95	d__Bacteria;p__Campylobacterota;c__Campylobacteria;o__Campylobacterales;f__Campylobacteraceae;g__Campylobacter_D;s__Campylobacter_D jejuni	97.52	0.909	d__Bacteria;p__Campylobacterota;c__Campylobacteria;o__Campylobacterales;f__Campylobacteraceae;g__Campylobacter_D;s__	taxonomic classification defined by topology and ANI	topological placement and ANI have congruent species assignments	GCA_014305285.1, s__Campylobacter_D jejuni_D, 95.0, 94.35, 0.907; GCA_000163995.1, s__Campylobacter_D jejuni_A, 95.0, 91.03, 0.875; GCF_000254135.1, s__Campylobacter_D coli, 95.0, 86.05, 0.807; GCF_001687475.2, s__Campylobacter_D hepaticus, 95.0, 84.08, 0.812; GCF_001492295.1, s__Campylobacter_D coli_B, 95.0, 83.98, 0.794; GCF_016806695.1, s__Campylobacter_D bilis, 95.0, 83.66, 0.864; GCF_0004700…	78.25	11	N/A	N/A
ATCC29428_R10_Guppy_HAC_flye	d__Bacteria;p__Campylobacterota;c__Campylobacteria;o__Campylobacterales;f__Campylobacteraceae;g__Campylobacter_D;s__Campylobacter_D jejuni	GCF_001457695.1	95	d__Bacteria;p__Campylobacterota;c__Campylobacteria;o__Campylobacterales;f__Campylobacteraceae;g__Campylobacter_D;s__Campylobacter_D jejuni	97.53	0.911	GCF_001457695.1	95	d__Bacteria;p__Campylobacterota;c__Campylobacteria;o__Campylobacterales;f__Campylobacteraceae;g__Campylobacter_D;s__Campylobacter_D jejuni	97.53	0.911	d__Bacteria;p__Campylobacterota;c__Campylobacteria;o__Campylobacterales;f__Campylobacteraceae;g__Campylobacter_D;s__	taxonomic classification defined by topology and ANI	topological placement and ANI have congruent species assignments	GCA_014305285.1, s__Campylobacter_D jejuni_D, 95.0, 94.43, 0.907; GCA_000163995.1, s__Campylobacter_D jejuni_A, 95.0, 91.1, 0.868; GCF_000254135.1, s__Campylobacter_D coli, 95.0, 86.08, 0.81; GCF_001492295.1, s__Campylobacter_D coli_B, 95.0, 84.03, 0.774; GCF_001687475.2, s__Campylobacter_D hepaticus, 95.0, 83.98, 0.81; GCF_016806695.1, s__Campylobacter_D bilis, 95.0, 83.62, 0.881; GCF_000470055.…	81.41	11	N/A	N/A
ATCC29428_R10_Guppy_HAC_medaka_2_0	d__Bacteria;p__Campylobacterota;c__Campylobacteria;o__Campylobacterales;f__Campylobacteraceae;g__Campylobacter_D;s__Campylobacter_D jejuni	GCF_001457695.1	95	d__Bacteria;p__Campylobacterota;c__Campylobacteria;o__Campylobacterales;f__Campylobacteraceae;g__Campylobacter_D;s__Campylobacter_D jejuni	97.54	0.909	GCF_001457695.1	95	d__Bacteria;p__Campylobacterota;c__Campylobacteria;o__Campylobacterales;f__Campylobacteraceae;g__Campylobacter_D;s__Campylobacter_D jejuni	97.54	0.909	d__Bacteria;p__Campylobacterota;c__Campylobacteria;o__Campylobacterales;f__Campylobacteraceae;g__Campylobacter_D;s__	taxonomic classification defined by topology and ANI	topological placement and ANI have congruent species assignments	GCA_014305285.1, s__Campylobacter_D jejuni_D, 95.0, 94.47, 0.901; GCA_000163995.1, s__Campylobacter_D jejuni_A, 95.0, 91.09, 0.863; GCF_000254135.1, s__Campylobacter_D coli, 95.0, 86.06, 0.808; GCF_001492295.1, s__Campylobacter_D coli_B, 95.0, 83.99, 0.783; GCF_001687475.2, s__Campylobacter_D hepaticus, 95.0, 83.98, 0.812; GCF_000470055.1, s__Campylobacter_D coli_A, 95.0, 83.64, 0.818; GCF_016806…	80.34	11	N/A	N/A
ATCC29428_R10_Guppy_HAC_new	d__Bacteria;p__Campylobacterota;c__Campylobacteria;o__Campylobacterales;f__Campylobacteraceae;g__Campylobacter_D;s__Campylobacter_D jejuni	GCF_001457695.1	95	d__Bacteria;p__Campylobacterota;c__Campylobacteria;o__Campylobacterales;f__Campylobacteraceae;g__Campylobacter_D;s__Campylobacter_D jejuni	97.54	0.909	GCF_001457695.1	95	d__Bacteria;p__Campylobacterota;c__Campylobacteria;o__Campylobacterales;f__Campylobacteraceae;g__Campylobacter_D;s__Campylobacter_D jejuni	97.54	0.909	d__Bacteria;p__Campylobacterota;c__Campylobacteria;o__Campylobacterales;f__Campylobacteraceae;g__Campylobacter_D;s__	taxonomic classification defined by topology and ANI	topological placement and ANI have congruent species assignments	GCA_014305285.1, s__Campylobacter_D jejuni_D, 95.0, 94.45, 0.907; GCA_000163995.1, s__Campylobacter_D jejuni_A, 95.0, 91.1, 0.865; GCF_000254135.1, s__Campylobacter_D coli, 95.0, 86.08, 0.808; GCF_001492295.1, s__Campylobacter_D coli_B, 95.0, 84.02, 0.778; GCF_001687475.2, s__Campylobacter_D hepaticus, 95.0, 83.98, 0.81; GCF_016806695.1, s__Campylobacter_D bilis, 95.0, 83.64, 0.884; GCF_000470055…	82.22	11	N/A	N/A
ATCC29428_R10_Guppy_SUP_flye	d__Bacteria;p__Campylobacterota;c__Campylobacteria;o__Campylobacterales;f__Campylobacteraceae;g__Campylobacter_D;s__Campylobacter_D jejuni	GCF_001457695.1	95	d__Bacteria;p__Campylobacterota;c__Campylobacteria;o__Campylobacterales;f__Campylobacteraceae;g__Campylobacter_D;s__Campylobacter_D jejuni	97.57	0.915	GCF_001457695.1	95	d__Bacteria;p__Campylobacterota;c__Campylobacteria;o__Campylobacterales;f__Campylobacteraceae;g__Campylobacter_D;s__Campylobacter_D jejuni	97.57	0.915	d__Bacteria;p__Campylobacterota;c__Campylobacteria;o__Campylobacterales;f__Campylobacteraceae;g__Campylobacter_D;s__	taxonomic classification defined by topology and ANI	topological placement and ANI have congruent species assignments	GCA_014305285.1, s__Campylobacter_D jejuni_D, 95.0, 94.41, 0.905; GCA_000163995.1, s__Campylobacter_D jejuni_A, 95.0, 91.1, 0.874; GCF_000254135.1, s__Campylobacter_D coli, 95.0, 86.1, 0.816; GCF_001492295.1, s__Campylobacter_D coli_B, 95.0, 84.07, 0.785; GCF_001687475.2, s__Campylobacter_D hepaticus, 95.0, 83.98, 0.826; GCF_016806695.1, s__Campylobacter_D bilis, 95.0, 83.69, 0.886; GCF_000470055…	81.09	11	N/A	N/A
ATCC29428_R10_Guppy_SUP_medaka_2_0	d__Bacteria;p__Campylobacterota;c__Campylobacteria;o__Campylobacterales;f__Campylobacteraceae;g__Campylobacter_D;s__Campylobacter_D jejuni	GCF_001457695.1	95	d__Bacteria;p__Campylobacterota;c__Campylobacteria;o__Campylobacterales;f__Campylobacteraceae;g__Campylobacter_D;s__Campylobacter_D jejuni	97.57	0.916	GCF_001457695.1	95	d__Bacteria;p__Campylobacterota;c__Campylobacteria;o__Campylobacterales;f__Campylobacteraceae;g__Campylobacter_D;s__Campylobacter_D jejuni	97.57	0.916	d__Bacteria;p__Campylobacterota;c__Campylobacteria;o__Campylobacterales;f__Campylobacteraceae;g__Campylobacter_D;s__	taxonomic classification defined by topology and ANI	topological placement and ANI have congruent species assignments	GCA_014305285.1, s__Campylobacter_D jejuni_D, 95.0, 94.4, 0.905; GCA_000163995.1, s__Campylobacter_D jejuni_A, 95.0, 91.17, 0.868; GCF_000254135.1, s__Campylobacter_D coli, 95.0, 86.13, 0.816; GCF_001492295.1, s__Campylobacter_D coli_B, 95.0, 84.02, 0.783; GCF_001687475.2, s__Campylobacter_D hepaticus, 95.0, 83.98, 0.826; GCF_016806695.1, s__Campylobacter_D bilis, 95.0, 83.69, 0.892; GCF_00047005…	81.21	11	N/A	N/A
ATCC29428_R10_Guppy_SUP_new	d__Bacteria;p__Campylobacterota;c__Campylobacteria;o__Campylobacterales;f__Campylobacteraceae;g__Campylobacter_D;s__Campylobacter_D jejuni	GCF_001457695.1	95	d__Bacteria;p__Campylobacterota;c__Campylobacteria;o__Campylobacterales;f__Campylobacteraceae;g__Campylobacter_D;s__Campylobacter_D jejuni	97.57	0.916	GCF_001457695.1	95	d__Bacteria;p__Campylobacterota;c__Campylobacteria;o__Campylobacterales;f__Campylobacteraceae;g__Campylobacter_D;s__Campylobacter_D jejuni	97.57	0.916	d__Bacteria;p__Campylobacterota;c__Campylobacteria;o__Campylobacterales;f__Campylobacteraceae;g__Campylobacter_D;s__	taxonomic classification defined by topology and ANI	topological placement and ANI have congruent species assignments	GCA_014305285.1, s__Campylobacter_D jejuni_D, 95.0, 94.42, 0.905; GCA_000163995.1, s__Campylobacter_D jejuni_A, 95.0, 91.13, 0.874; GCF_000254135.1, s__Campylobacter_D coli, 95.0, 86.09, 0.818; GCF_001492295.1, s__Campylobacter_D coli_B, 95.0, 84.06, 0.785; GCF_001687475.2, s__Campylobacter_D hepaticus, 95.0, 83.97, 0.826; GCF_016806695.1, s__Campylobacter_D bilis, 95.0, 83.7, 0.886; GCF_00047005…	80.77	11	N/A	N/A
ATCC29428_R9_Dorado_FAST_flye	d__Bacteria;p__Campylobacterota;c__Campylobacteria;o__Campylobacterales;f__Campylobacteraceae;g__Campylobacter_D;s__Campylobacter_D jejuni	GCF_001457695.1	95	d__Bacteria;p__Campylobacterota;c__Campylobacteria;o__Campylobacterales;f__Campylobacteraceae;g__Campylobacter_D;s__Campylobacter_D jejuni	97.42	0.925	GCF_001457695.1	95	d__Bacteria;p__Campylobacterota;c__Campylobacteria;o__Campylobacterales;f__Campylobacteraceae;g__Campylobacter_D;s__Campylobacter_D jejuni	97.42	0.925	d__Bacteria;p__Campylobacterota;c__Campylobacteria;o__Campylobacterales;f__Campylobacteraceae;g__Campylobacter_D;s__	taxonomic classification defined by topology and ANI	topological placement and ANI have congruent species assignments	GCA_014305285.1, s__Campylobacter_D jejuni_D, 95.0, 94.31, 0.892; GCA_000163995.1, s__Campylobacter_D jejuni_A, 95.0, 90.93, 0.879; GCF_000254135.1, s__Campylobacter_D coli, 95.0, 85.99, 0.786; GCF_001492295.1, s__Campylobacter_D coli_B, 95.0, 83.77, 0.799; GCF_001687475.2, s__Campylobacter_D hepaticus, 95.0, 83.74, 0.838; GCF_016806695.1, s__Campylobacter_D bilis, 95.0, 83.53, 0.875; GCF_0004700…	37.58	11	N/A	N/A
ATCC29428_R9_Dorado_HAC_flye	d__Bacteria;p__Campylobacterota;c__Campylobacteria;o__Campylobacterales;f__Campylobacteraceae;g__Campylobacter_D;s__Campylobacter_D jejuni	GCF_001457695.1	95	d__Bacteria;p__Campylobacterota;c__Campylobacteria;o__Campylobacterales;f__Campylobacteraceae;g__Campylobacter_D;s__Campylobacter_D jejuni	97.54	0.914	GCF_001457695.1	95	d__Bacteria;p__Campylobacterota;c__Campylobacteria;o__Campylobacterales;f__Campylobacteraceae;g__Campylobacter_D;s__Campylobacter_D jejuni	97.54	0.914	d__Bacteria;p__Campylobacterota;c__Campylobacteria;o__Campylobacterales;f__Campylobacteraceae;g__Campylobacter_D;s__	taxonomic classification defined by topology and ANI	topological placement and ANI have congruent species assignments	GCA_014305285.1, s__Campylobacter_D jejuni_D, 95.0, 94.42, 0.905; GCA_000163995.1, s__Campylobacter_D jejuni_A, 95.0, 91.12, 0.866; GCF_000254135.1, s__Campylobacter_D coli, 95.0, 86.24, 0.81; GCF_001687475.2, s__Campylobacter_D hepaticus, 95.0, 83.93, 0.814; GCF_001492295.1, s__Campylobacter_D coli_B, 95.0, 83.86, 0.815; GCF_016806695.1, s__Campylobacter_D bilis, 95.0, 83.58, 0.89; GCF_000470055…	55.15	11	N/A	N/A
ATCC29428_R9_Dorado_SUP_flye	d__Bacteria;p__Campylobacterota;c__Campylobacteria;o__Campylobacterales;f__Campylobacteraceae;g__Campylobacter_D;s__Campylobacter_D jejuni	GCF_001457695.1	95	d__Bacteria;p__Campylobacterota;c__Campylobacteria;o__Campylobacterales;f__Campylobacteraceae;g__Campylobacter_D;s__Campylobacter_D jejuni	97.56	0.907	GCF_001457695.1	95	d__Bacteria;p__Campylobacterota;c__Campylobacteria;o__Campylobacterales;f__Campylobacteraceae;g__Campylobacter_D;s__Campylobacter_D jejuni	97.56	0.907	d__Bacteria;p__Campylobacterota;c__Campylobacteria;o__Campylobacterales;f__Campylobacteraceae;g__Campylobacter_D;s__	taxonomic classification defined by topology and ANI	topological placement and ANI have congruent species assignments	GCA_014305285.1, s__Campylobacter_D jejuni_D, 95.0, 94.44, 0.897; GCA_000163995.1, s__Campylobacter_D jejuni_A, 95.0, 91.01, 0.875; GCF_000254135.1, s__Campylobacter_D coli, 95.0, 86.06, 0.799; GCF_001687475.2, s__Campylobacter_D hepaticus, 95.0, 84.0, 0.806; GCF_001492295.1, s__Campylobacter_D coli_B, 95.0, 83.97, 0.786; GCF_016806695.1, s__Campylobacter_D bilis, 95.0, 83.61, 0.879; GCF_00047005…	67.96	11	N/A	N/A
ATCC29428_R9_Guppy_FAST_flye	d__Bacteria;p__Campylobacterota;c__Campylobacteria;o__Campylobacterales;f__Campylobacteraceae;g__Campylobacter_D;s__Campylobacter_D jejuni	GCF_001457695.1	95	d__Bacteria;p__Campylobacterota;c__Campylobacteria;o__Campylobacterales;f__Campylobacteraceae;g__Campylobacter_D;s__Campylobacter_D jejuni	97.27	0.911	GCF_001457695.1	95	d__Bacteria;p__Campylobacterota;c__Campylobacteria;o__Campylobacterales;f__Campylobacteraceae;g__Campylobacter_D;s__Campylobacter_D jejuni	97.27	0.911	d__Bacteria;p__Campylobacterota;c__Campylobacteria;o__Campylobacterales;f__Campylobacteraceae;g__Campylobacter_D;s__	taxonomic classification defined by topology and ANI	topological placement and ANI have congruent species assignments	GCA_014305285.1, s__Campylobacter_D jejuni_D, 95.0, 94.19, 0.903; GCA_000163995.1, s__Campylobacter_D jejuni_A, 95.0, 90.85, 0.866; GCF_000254135.1, s__Campylobacter_D coli, 95.0, 85.91, 0.801; GCF_001687475.2, s__Campylobacter_D hepaticus, 95.0, 83.75, 0.802; GCF_001492295.1, s__Campylobacter_D coli_B, 95.0, 83.72, 0.798; GCF_016806695.1, s__Campylobacter_D bilis, 95.0, 83.42, 0.884; GCF_0004700…	38.51	11	N/A	N/A
ATCC29428_R9_Guppy_FAST_new	d__Bacteria;p__Campylobacterota;c__Campylobacteria;o__Campylobacterales;f__Campylobacteraceae;g__Campylobacter_D;s__Campylobacter_D jejuni	GCF_001457695.1	95	d__Bacteria;p__Campylobacterota;c__Campylobacteria;o__Campylobacterales;f__Campylobacteraceae;g__Campylobacter_D;s__Campylobacter_D jejuni	97.53	0.922	GCF_001457695.1	95	d__Bacteria;p__Campylobacterota;c__Campylobacteria;o__Campylobacterales;f__Campylobacteraceae;g__Campylobacter_D;s__Campylobacter_D jejuni	97.53	0.922	d__Bacteria;p__Campylobacterota;c__Campylobacteria;o__Campylobacterales;f__Campylobacteraceae;g__Campylobacter_D;s__	taxonomic classification defined by topology and ANI	topological placement and ANI have congruent species assignments	GCA_014305285.1, s__Campylobacter_D jejuni_D, 95.0, 94.39, 0.899; GCA_000163995.1, s__Campylobacter_D jejuni_A, 95.0, 91.09, 0.87; GCF_000254135.1, s__Campylobacter_D coli, 95.0, 86.15, 0.799; GCF_001687475.2, s__Campylobacter_D hepaticus, 95.0, 84.06, 0.82; GCF_001492295.1, s__Campylobacter_D coli_B, 95.0, 84.01, 0.802; GCF_000470055.1, s__Campylobacter_D coli_A, 95.0, 83.63, 0.818; GCF_01680669…	69.53	11	N/A	N/A
ATCC29428_R9_Guppy_HAC_flye	d__Bacteria;p__Campylobacterota;c__Campylobacteria;o__Campylobacterales;f__Campylobacteraceae;g__Campylobacter_D;s__Campylobacter_D jejuni	GCF_001457695.1	95	d__Bacteria;p__Campylobacterota;c__Campylobacteria;o__Campylobacterales;f__Campylobacteraceae;g__Campylobacter_D;s__Campylobacter_D jejuni	97.54	0.915	GCF_001457695.1	95	d__Bacteria;p__Campylobacterota;c__Campylobacteria;o__Campylobacterales;f__Campylobacteraceae;g__Campylobacter_D;s__Campylobacter_D jejuni	97.54	0.915	d__Bacteria;p__Campylobacterota;c__Campylobacteria;o__Campylobacterales;f__Campylobacteraceae;g__Campylobacter_D;s__	taxonomic classification defined by topology and ANI	topological placement and ANI have congruent species assignments	GCA_014305285.1, s__Campylobacter_D jejuni_D, 95.0, 94.42, 0.897; GCA_000163995.1, s__Campylobacter_D jejuni_A, 95.0, 91.1, 0.867; GCF_000254135.1, s__Campylobacter_D coli, 95.0, 86.13, 0.812; GCF_001687475.2, s__Campylobacter_D hepaticus, 95.0, 84.03, 0.81; GCF_001492295.1, s__Campylobacter_D coli_B, 95.0, 83.87, 0.799; GCF_016806695.1, s__Campylobacter_D bilis, 95.0, 83.58, 0.879; GCF_000470055…	59.42	11	N/A	N/A
ATCC29428_R9_Guppy_HAC_new	d__Bacteria;p__Campylobacterota;c__Campylobacteria;o__Campylobacterales;f__Campylobacteraceae;g__Campylobacter_D;s__Campylobacter_D jejuni	GCF_001457695.1	95	d__Bacteria;p__Campylobacterota;c__Campylobacteria;o__Campylobacterales;f__Campylobacteraceae;g__Campylobacter_D;s__Campylobacter_D jejuni	97.46	0.925	GCF_001457695.1	95	d__Bacteria;p__Campylobacterota;c__Campylobacteria;o__Campylobacterales;f__Campylobacteraceae;g__Campylobacter_D;s__Campylobacter_D jejuni	97.46	0.925	d__Bacteria;p__Campylobacterota;c__Campylobacteria;o__Campylobacterales;f__Campylobacteraceae;g__Campylobacter_D;s__	taxonomic classification defined by topology and ANI	topological placement and ANI have congruent species assignments	GCA_014305285.1, s__Campylobacter_D jejuni_D, 95.0, 94.34, 0.892; GCA_000163995.1, s__Campylobacter_D jejuni_A, 95.0, 91.02, 0.859; GCF_000254135.1, s__Campylobacter_D coli, 95.0, 86.16, 0.814; GCF_001687475.2, s__Campylobacter_D hepaticus, 95.0, 83.94, 0.814; GCF_001492295.1, s__Campylobacter_D coli_B, 95.0, 83.94, 0.811; GCF_016806695.1, s__Campylobacter_D bilis, 95.0, 83.61, 0.871; GCF_0004700…	57.62	11	N/A	N/A
ATCC29428_R9_Guppy_SUP_flye	d__Bacteria;p__Campylobacterota;c__Campylobacteria;o__Campylobacterales;f__Campylobacteraceae;g__Campylobacter_D;s__Campylobacter_D jejuni	GCF_001457695.1	95	d__Bacteria;p__Campylobacterota;c__Campylobacteria;o__Campylobacterales;f__Campylobacteraceae;g__Campylobacter_D;s__Campylobacter_D jejuni	97.59	0.913	GCF_001457695.1	95	d__Bacteria;p__Campylobacterota;c__Campylobacteria;o__Campylobacterales;f__Campylobacteraceae;g__Campylobacter_D;s__Campylobacter_D jejuni	97.59	0.913	d__Bacteria;p__Campylobacterota;c__Campylobacteria;o__Campylobacterales;f__Campylobacteraceae;g__Campylobacter_D;s__	taxonomic classification defined by topology and ANI	topological placement and ANI have congruent species assignments	GCA_014305285.1, s__Campylobacter_D jejuni_D, 95.0, 94.43, 0.907; GCA_000163995.1, s__Campylobacter_D jejuni_A, 95.0, 91.13, 0.87; GCF_000254135.1, s__Campylobacter_D coli, 95.0, 86.23, 0.816; GCF_001492295.1, s__Campylobacter_D coli_B, 95.0, 84.11, 0.779; GCF_001687475.2, s__Campylobacter_D hepaticus, 95.0, 84.01, 0.826; GCF_016806695.1, s__Campylobacter_D bilis, 95.0, 83.66, 0.899; GCF_00047005…	77.22	11	N/A	N/A
ATCC29428_R9_Guppy_SUP_new	d__Bacteria;p__Campylobacterota;c__Campylobacteria;o__Campylobacterales;f__Campylobacteraceae;g__Campylobacter_D;s__Campylobacter_D jejuni	GCF_001457695.1	95	d__Bacteria;p__Campylobacterota;c__Campylobacteria;o__Campylobacterales;f__Campylobacteraceae;g__Campylobacter_D;s__Campylobacter_D jejuni	97.48	0.927	GCF_001457695.1	95	d__Bacteria;p__Campylobacterota;c__Campylobacteria;o__Campylobacterales;f__Campylobacteraceae;g__Campylobacter_D;s__Campylobacter_D jejuni	97.48	0.927	d__Bacteria;p__Campylobacterota;c__Campylobacteria;o__Campylobacterales;f__Campylobacteraceae;g__Campylobacter_D;s__	taxonomic classification defined by topology and ANI	topological placement and ANI have congruent species assignments	GCA_014305285.1, s__Campylobacter_D jejuni_D, 95.0, 94.31, 0.903; GCA_000163995.1, s__Campylobacter_D jejuni_A, 95.0, 91.01, 0.863; GCF_000254135.1, s__Campylobacter_D coli, 95.0, 86.11, 0.814; GCF_001492295.1, s__Campylobacter_D coli_B, 95.0, 83.94, 0.792; GCF_001687475.2, s__Campylobacter_D hepaticus, 95.0, 83.89, 0.832; GCF_000470055.1, s__Campylobacter_D coli_A, 95.0, 83.72, 0.818; GCF_016806…	63.73	11	N/A	N/A
ATCC29428_lrp_R10_Guppy_FAST_new	d__Bacteria;p__Campylobacterota;c__Campylobacteria;o__Campylobacterales;f__Campylobacteraceae;g__Campylobacter_D;s__Campylobacter_D jejuni	GCF_001457695.1	95	d__Bacteria;p__Campylobacterota;c__Campylobacteria;o__Campylobacterales;f__Campylobacteraceae;g__Campylobacter_D;s__Campylobacter_D jejuni	97.62	0.943	GCF_001457695.1	95	d__Bacteria;p__Campylobacterota;c__Campylobacteria;o__Campylobacterales;f__Campylobacteraceae;g__Campylobacter_D;s__Campylobacter_D jejuni	97.62	0.943	d__Bacteria;p__Campylobacterota;c__Campylobacteria;o__Campylobacterales;f__Campylobacteraceae;g__Campylobacter_D;s__	taxonomic classification defined by topology and ANI	topological placement and ANI have congruent species assignments	GCA_014305285.1, s__Campylobacter_D jejuni_D, 95.0, 94.33, 0.875; GCA_000163995.1, s__Campylobacter_D jejuni_A, 95.0, 91.15, 0.875; GCF_000254135.1, s__Campylobacter_D coli, 95.0, 85.94, 0.788; GCF_001687475.2, s__Campylobacter_D hepaticus, 95.0, 84.14, 0.8; GCF_016806695.1, s__Campylobacter_D bilis, 95.0, 83.8, 0.875; GCF_001492295.1, s__Campylobacter_D coli_B, 95.0, 83.71, 0.805; GCF_000470055.…	93.11	11	N/A	N/A
ATCC29428_lrp_R10_Guppy_HAC_new	d__Bacteria;p__Campylobacterota;c__Campylobacteria;o__Campylobacterales;f__Campylobacteraceae;g__Campylobacter_D;s__Campylobacter_D jejuni	GCF_001457695.1	95	d__Bacteria;p__Campylobacterota;c__Campylobacteria;o__Campylobacterales;f__Campylobacteraceae;g__Campylobacter_D;s__Campylobacter_D jejuni	97.62	0.943	GCF_001457695.1	95	d__Bacteria;p__Campylobacterota;c__Campylobacteria;o__Campylobacterales;f__Campylobacteraceae;g__Campylobacter_D;s__Campylobacter_D jejuni	97.62	0.943	d__Bacteria;p__Campylobacterota;c__Campylobacteria;o__Campylobacterales;f__Campylobacteraceae;g__Campylobacter_D;s__	taxonomic classification defined by topology and ANI	topological placement and ANI have congruent species assignments	GCA_014305285.1, s__Campylobacter_D jejuni_D, 95.0, 94.32, 0.875; GCA_000163995.1, s__Campylobacter_D jejuni_A, 95.0, 91.15, 0.875; GCF_000254135.1, s__Campylobacter_D coli, 95.0, 85.94, 0.788; GCF_001687475.2, s__Campylobacter_D hepaticus, 95.0, 84.14, 0.8; GCF_016806695.1, s__Campylobacter_D bilis, 95.0, 83.8, 0.875; GCF_001492295.1, s__Campylobacter_D coli_B, 95.0, 83.71, 0.805; GCF_000470055.…	93.11	11	N/A	N/A
ATCC29428_lrp_R10_Guppy_SUP_new	d__Bacteria;p__Campylobacterota;c__Campylobacteria;o__Campylobacterales;f__Campylobacteraceae;g__Campylobacter_D;s__Campylobacter_D jejuni	GCF_001457695.1	95	d__Bacteria;p__Campylobacterota;c__Campylobacteria;o__Campylobacterales;f__Campylobacteraceae;g__Campylobacter_D;s__Campylobacter_D jejuni	97.62	0.943	GCF_001457695.1	95	d__Bacteria;p__Campylobacterota;c__Campylobacteria;o__Campylobacterales;f__Campylobacteraceae;g__Campylobacter_D;s__Campylobacter_D jejuni	97.62	0.943	d__Bacteria;p__Campylobacterota;c__Campylobacteria;o__Campylobacterales;f__Campylobacteraceae;g__Campylobacter_D;s__	taxonomic classification defined by topology and ANI	topological placement and ANI have congruent species assignments	GCA_014305285.1, s__Campylobacter_D jejuni_D, 95.0, 94.32, 0.875; GCA_000163995.1, s__Campylobacter_D jejuni_A, 95.0, 91.15, 0.875; GCF_000254135.1, s__Campylobacter_D coli, 95.0, 85.94, 0.788; GCF_001687475.2, s__Campylobacter_D hepaticus, 95.0, 84.14, 0.8; GCF_016806695.1, s__Campylobacter_D bilis, 95.0, 83.8, 0.875; GCF_001492295.1, s__Campylobacter_D coli_B, 95.0, 83.71, 0.805; GCF_000470055.…	93.11	11	N/A	N/A
ATCC29428_lrp_R9_Guppy_FAST_new	d__Bacteria;p__Campylobacterota;c__Campylobacteria;o__Campylobacterales;f__Campylobacteraceae;g__Campylobacter_D;s__Campylobacter_D jejuni	GCF_001457695.1	95	d__Bacteria;p__Campylobacterota;c__Campylobacteria;o__Campylobacterales;f__Campylobacteraceae;g__Campylobacter_D;s__Campylobacter_D jejuni	97.6	0.935	GCF_001457695.1	95	d__Bacteria;p__Campylobacterota;c__Campylobacteria;o__Campylobacterales;f__Campylobacteraceae;g__Campylobacter_D;s__Campylobacter_D jejuni	97.6	0.935	d__Bacteria;p__Campylobacterota;c__Campylobacteria;o__Campylobacterales;f__Campylobacteraceae;g__Campylobacter_D;s__	taxonomic classification defined by topology and ANI	topological placement and ANI have congruent species assignments	GCA_014305285.1, s__Campylobacter_D jejuni_D, 95.0, 94.38, 0.868; GCA_000163995.1, s__Campylobacter_D jejuni_A, 95.0, 91.15, 0.884; GCF_000254135.1, s__Campylobacter_D coli, 95.0, 85.89, 0.796; GCF_001687475.2, s__Campylobacter_D hepaticus, 95.0, 84.04, 0.804; GCF_016806695.1, s__Campylobacter_D bilis, 95.0, 83.75, 0.881; GCF_001492295.1, s__Campylobacter_D coli_B, 95.0, 83.69, 0.802; GCF_0004700…	93.11	11	N/A	N/A
ATCC29428_lrp_R9_Guppy_HAC_new	d__Bacteria;p__Campylobacterota;c__Campylobacteria;o__Campylobacterales;f__Campylobacteraceae;g__Campylobacter_D;s__Campylobacter_D jejuni	GCF_001457695.1	95	d__Bacteria;p__Campylobacterota;c__Campylobacteria;o__Campylobacterales;f__Campylobacteraceae;g__Campylobacter_D;s__Campylobacter_D jejuni	97.6	0.935	GCF_001457695.1	95	d__Bacteria;p__Campylobacterota;c__Campylobacteria;o__Campylobacterales;f__Campylobacteraceae;g__Campylobacter_D;s__Campylobacter_D jejuni	97.6	0.935	d__Bacteria;p__Campylobacterota;c__Campylobacteria;o__Campylobacterales;f__Campylobacteraceae;g__Campylobacter_D;s__	taxonomic classification defined by topology and ANI	topological placement and ANI have congruent species assignments	GCA_014305285.1, s__Campylobacter_D jejuni_D, 95.0, 94.38, 0.868; GCA_000163995.1, s__Campylobacter_D jejuni_A, 95.0, 91.15, 0.884; GCF_000254135.1, s__Campylobacter_D coli, 95.0, 85.89, 0.796; GCF_001687475.2, s__Campylobacter_D hepaticus, 95.0, 84.04, 0.804; GCF_016806695.1, s__Campylobacter_D bilis, 95.0, 83.75, 0.881; GCF_001492295.1, s__Campylobacter_D coli_B, 95.0, 83.69, 0.802; GCF_0004700…	93.11	11	N/A	N/A
ATCC29428_lrp_R9_Guppy_SUP_new	d__Bacteria;p__Campylobacterota;c__Campylobacteria;o__Campylobacterales;f__Campylobacteraceae;g__Campylobacter_D;s__Campylobacter_D jejuni	GCF_001457695.1	95	d__Bacteria;p__Campylobacterota;c__Campylobacteria;o__Campylobacterales;f__Campylobacteraceae;g__Campylobacter_D;s__Campylobacter_D jejuni	97.6	0.935	GCF_001457695.1	95	d__Bacteria;p__Campylobacterota;c__Campylobacteria;o__Campylobacterales;f__Campylobacteraceae;g__Campylobacter_D;s__Campylobacter_D jejuni	97.6	0.935	d__Bacteria;p__Campylobacterota;c__Campylobacteria;o__Campylobacterales;f__Campylobacteraceae;g__Campylobacter_D;s__	taxonomic classification defined by topology and ANI	topological placement and ANI have congruent species assignments	GCA_014305285.1, s__Campylobacter_D jejuni_D, 95.0, 94.38, 0.868; GCA_000163995.1, s__Campylobacter_D jejuni_A, 95.0, 91.15, 0.884; GCF_000254135.1, s__Campylobacter_D coli, 95.0, 85.89, 0.796; GCF_001687475.2, s__Campylobacter_D hepaticus, 95.0, 84.04, 0.804; GCF_016806695.1, s__Campylobacter_D bilis, 95.0, 83.75, 0.881; GCF_001492295.1, s__Campylobacter_D coli_B, 95.0, 83.69, 0.802; GCF_0004700…	93.11	11	N/A	N/A
ATCC29428_srp_R10_Guppy_FAST_new	d__Bacteria;p__Campylobacterota;c__Campylobacteria;o__Campylobacterales;f__Campylobacteraceae;g__Campylobacter_D;s__Campylobacter_D jejuni	GCF_001457695.1	95	d__Bacteria;p__Campylobacterota;c__Campylobacteria;o__Campylobacterales;f__Campylobacteraceae;g__Campylobacter_D;s__Campylobacter_D jejuni	97.6	0.922	GCF_001457695.1	95	d__Bacteria;p__Campylobacterota;c__Campylobacteria;o__Campylobacterales;f__Campylobacteraceae;g__Campylobacter_D;s__Campylobacter_D jejuni	97.6	0.922	d__Bacteria;p__Campylobacterota;c__Campylobacteria;o__Campylobacterales;f__Campylobacteraceae;g__Campylobacter_D;s__	taxonomic classification defined by topology and ANI	topological placement and ANI have congruent species assignments	GCA_014305285.1, s__Campylobacter_D jejuni_D, 95.0, 94.52, 0.899; GCA_000163995.1, s__Campylobacter_D jejuni_A, 95.0, 91.19, 0.875; GCF_000254135.1, s__Campylobacter_D coli, 95.0, 86.31, 0.803; GCF_001687475.2, s__Campylobacter_D hepaticus, 95.0, 84.17, 0.826; GCF_001492295.1, s__Campylobacter_D coli_B, 95.0, 83.88, 0.817; GCF_016806695.1, s__Campylobacter_D bilis, 95.0, 83.69, 0.905; GCF_0004700…	93.11	11	N/A	N/A
ATCC29428_srp_R10_Guppy_HAC_new	d__Bacteria;p__Campylobacterota;c__Campylobacteria;o__Campylobacterales;f__Campylobacteraceae;g__Campylobacter_D;s__Campylobacter_D jejuni	GCF_001457695.1	95	d__Bacteria;p__Campylobacterota;c__Campylobacteria;o__Campylobacterales;f__Campylobacteraceae;g__Campylobacter_D;s__Campylobacter_D jejuni	97.66	0.915	GCF_001457695.1	95	d__Bacteria;p__Campylobacterota;c__Campylobacteria;o__Campylobacterales;f__Campylobacteraceae;g__Campylobacter_D;s__Campylobacter_D jejuni	97.66	0.915	d__Bacteria;p__Campylobacterota;c__Campylobacteria;o__Campylobacterales;f__Campylobacteraceae;g__Campylobacter_D;s__	taxonomic classification defined by topology and ANI	topological placement and ANI have congruent species assignments	GCA_014305285.1, s__Campylobacter_D jejuni_D, 95.0, 94.53, 0.903; GCA_000163995.1, s__Campylobacter_D jejuni_A, 95.0, 91.23, 0.863; GCF_000254135.1, s__Campylobacter_D coli, 95.0, 86.07, 0.81; GCF_001687475.2, s__Campylobacter_D hepaticus, 95.0, 84.0, 0.824; GCF_001492295.1, s__Campylobacter_D coli_B, 95.0, 83.94, 0.795; GCF_016806695.1, s__Campylobacter_D bilis, 95.0, 83.85, 0.879; GCF_000470055…	93.11	11	N/A	N/A
ATCC29428_srp_R10_Guppy_SUP_new	d__Bacteria;p__Campylobacterota;c__Campylobacteria;o__Campylobacterales;f__Campylobacteraceae;g__Campylobacter_D;s__Campylobacter_D jejuni	GCF_001457695.1	95	d__Bacteria;p__Campylobacterota;c__Campylobacteria;o__Campylobacterales;f__Campylobacteraceae;g__Campylobacter_D;s__Campylobacter_D jejuni	97.67	0.915	GCF_001457695.1	95	d__Bacteria;p__Campylobacterota;c__Campylobacteria;o__Campylobacterales;f__Campylobacteraceae;g__Campylobacter_D;s__Campylobacter_D jejuni	97.67	0.915	d__Bacteria;p__Campylobacterota;c__Campylobacteria;o__Campylobacterales;f__Campylobacteraceae;g__Campylobacter_D;s__	taxonomic classification defined by topology and ANI	topological placement and ANI have congruent species assignments	GCA_014305285.1, s__Campylobacter_D jejuni_D, 95.0, 94.58, 0.901; GCA_000163995.1, s__Campylobacter_D jejuni_A, 95.0, 91.15, 0.883; GCF_000254135.1, s__Campylobacter_D coli, 95.0, 86.18, 0.814; GCF_001492295.1, s__Campylobacter_D coli_B, 95.0, 84.02, 0.786; GCF_001687475.2, s__Campylobacter_D hepaticus, 95.0, 83.95, 0.83; GCF_016806695.1, s__Campylobacter_D bilis, 95.0, 83.77, 0.881; GCF_00047005…	93.11	11	N/A	N/A
ATCC29428_srp_R9_Guppy_FAST_new	d__Bacteria;p__Campylobacterota;c__Campylobacteria;o__Campylobacterales;f__Campylobacteraceae;g__Campylobacter_D;s__Campylobacter_D jejuni	GCF_001457695.1	95	d__Bacteria;p__Campylobacterota;c__Campylobacteria;o__Campylobacterales;f__Campylobacteraceae;g__Campylobacter_D;s__Campylobacter_D jejuni	97.66	0.925	GCF_001457695.1	95	d__Bacteria;p__Campylobacterota;c__Campylobacteria;o__Campylobacterales;f__Campylobacteraceae;g__Campylobacter_D;s__Campylobacter_D jejuni	97.66	0.925	d__Bacteria;p__Campylobacterota;c__Campylobacteria;o__Campylobacterales;f__Campylobacteraceae;g__Campylobacter_D;s__	taxonomic classification defined by topology and ANI	topological placement and ANI have congruent species assignments	GCA_014305285.1, s__Campylobacter_D jejuni_D, 95.0, 94.48, 0.899; GCA_000163995.1, s__Campylobacter_D jejuni_A, 95.0, 91.18, 0.874; GCF_000254135.1, s__Campylobacter_D coli, 95.0, 86.19, 0.808; GCF_001687475.2, s__Campylobacter_D hepaticus, 95.0, 84.1, 0.82; GCF_001492295.1, s__Campylobacter_D coli_B, 95.0, 83.99, 0.792; GCF_016806695.1, s__Campylobacter_D bilis, 95.0, 83.73, 0.879; GCF_000470055…	93.11	11	N/A	N/A
ATCC29428_srp_R9_Guppy_HAC_new	d__Bacteria;p__Campylobacterota;c__Campylobacteria;o__Campylobacterales;f__Campylobacteraceae;g__Campylobacter_D;s__Campylobacter_D jejuni	GCF_001457695.1	95	d__Bacteria;p__Campylobacterota;c__Campylobacteria;o__Campylobacterales;f__Campylobacteraceae;g__Campylobacter_D;s__Campylobacter_D jejuni	97.66	0.923	GCF_001457695.1	95	d__Bacteria;p__Campylobacterota;c__Campylobacteria;o__Campylobacterales;f__Campylobacteraceae;g__Campylobacter_D;s__Campylobacter_D jejuni	97.66	0.923	d__Bacteria;p__Campylobacterota;c__Campylobacteria;o__Campylobacterales;f__Campylobacteraceae;g__Campylobacter_D;s__	taxonomic classification defined by topology and ANI	topological placement and ANI have congruent species assignments	GCA_014305285.1, s__Campylobacter_D jejuni_D, 95.0, 94.51, 0.897; GCA_000163995.1, s__Campylobacter_D jejuni_A, 95.0, 91.19, 0.872; GCF_000254135.1, s__Campylobacter_D coli, 95.0, 86.2, 0.808; GCF_001687475.2, s__Campylobacter_D hepaticus, 95.0, 84.1, 0.822; GCF_001492295.1, s__Campylobacter_D coli_B, 95.0, 83.94, 0.797; GCF_016806695.1, s__Campylobacter_D bilis, 95.0, 83.75, 0.877; GCF_000470055…	93.11	11	N/A	N/A
ATCC29428_srp_R9_Guppy_SUP_new	d__Bacteria;p__Campylobacterota;c__Campylobacteria;o__Campylobacterales;f__Campylobacteraceae;g__Campylobacter_D;s__Campylobacter_D jejuni	GCF_001457695.1	95	d__Bacteria;p__Campylobacterota;c__Campylobacteria;o__Campylobacterales;f__Campylobacteraceae;g__Campylobacter_D;s__Campylobacter_D jejuni	97.65	0.923	GCF_001457695.1	95	d__Bacteria;p__Campylobacterota;c__Campylobacteria;o__Campylobacterales;f__Campylobacteraceae;g__Campylobacter_D;s__Campylobacter_D jejuni	97.65	0.923	d__Bacteria;p__Campylobacterota;c__Campylobacteria;o__Campylobacterales;f__Campylobacteraceae;g__Campylobacter_D;s__	taxonomic classification defined by topology and ANI	topological placement and ANI have congruent species assignments	GCA_014305285.1, s__Campylobacter_D jejuni_D, 95.0, 94.48, 0.903; GCA_000163995.1, s__Campylobacter_D jejuni_A, 95.0, 91.18, 0.874; GCF_000254135.1, s__Campylobacter_D coli, 95.0, 86.1, 0.805; GCF_001687475.2, s__Campylobacter_D hepaticus, 95.0, 84.1, 0.822; GCF_001492295.1, s__Campylobacter_D coli_B, 95.0, 83.92, 0.794; GCF_016806695.1, s__Campylobacter_D bilis, 95.0, 83.72, 0.884; GCF_000470055…	93.11	11	N/A	N/A
ATCC_29428_R10_Dorado_FAST_new	d__Bacteria;p__Campylobacterota;c__Campylobacteria;o__Campylobacterales;f__Campylobacteraceae;g__Campylobacter_D;s__Campylobacter_D jejuni	GCF_001457695.1	95	d__Bacteria;p__Campylobacterota;c__Campylobacteria;o__Campylobacterales;f__Campylobacteraceae;g__Campylobacter_D;s__Campylobacter_D jejuni	97.53	0.909	GCF_001457695.1	95	d__Bacteria;p__Campylobacterota;c__Campylobacteria;o__Campylobacterales;f__Campylobacteraceae;g__Campylobacter_D;s__Campylobacter_D jejuni	97.53	0.909	d__Bacteria;p__Campylobacterota;c__Campylobacteria;o__Campylobacterales;f__Campylobacteraceae;g__Campylobacter_D;s__	taxonomic classification defined by topology and ANI	topological placement and ANI have congruent species assignments	GCA_014305285.1, s__Campylobacter_D jejuni_D, 95.0, 94.44, 0.897; GCA_000163995.1, s__Campylobacter_D jejuni_A, 95.0, 91.09, 0.868; GCF_000254135.1, s__Campylobacter_D coli, 95.0, 86.04, 0.812; GCF_001492295.1, s__Campylobacter_D coli_B, 95.0, 83.98, 0.781; GCF_001687475.2, s__Campylobacter_D hepaticus, 95.0, 83.96, 0.81; GCF_000470055.1, s__Campylobacter_D coli_A, 95.0, 83.62, 0.814; GCF_0168066…	74.12	11	N/A	N/A
ATCC_29428_R10_Dorado_HAC_new	d__Bacteria;p__Campylobacterota;c__Campylobacteria;o__Campylobacterales;f__Campylobacteraceae;g__Campylobacter_D;s__Campylobacter_D jejuni	GCF_001457695.1	95	d__Bacteria;p__Campylobacterota;c__Campylobacteria;o__Campylobacterales;f__Campylobacteraceae;g__Campylobacter_D;s__Campylobacter_D jejuni	97.55	0.904	GCF_001457695.1	95	d__Bacteria;p__Campylobacterota;c__Campylobacteria;o__Campylobacterales;f__Campylobacteraceae;g__Campylobacter_D;s__Campylobacter_D jejuni	97.55	0.904	d__Bacteria;p__Campylobacterota;c__Campylobacteria;o__Campylobacterales;f__Campylobacteraceae;g__Campylobacter_D;s__	taxonomic classification defined by topology and ANI	topological placement and ANI have congruent species assignments	GCA_014305285.1, s__Campylobacter_D jejuni_D, 95.0, 94.42, 0.896; GCA_000163995.1, s__Campylobacter_D jejuni_A, 95.0, 91.0, 0.881; GCF_000254135.1, s__Campylobacter_D coli, 95.0, 86.12, 0.797; GCF_001687475.2, s__Campylobacter_D hepaticus, 95.0, 84.04, 0.802; GCF_001492295.1, s__Campylobacter_D coli_B, 95.0, 83.97, 0.79; GCF_016806695.1, s__Campylobacter_D bilis, 95.0, 83.68, 0.873; GCF_000470055…	78.67	11	N/A	N/A
ATCC_29428_R10_Dorado_SUP_new	d__Bacteria;p__Campylobacterota;c__Campylobacteria;o__Campylobacterales;f__Campylobacteraceae;g__Campylobacter_D;s__Campylobacter_D jejuni	GCF_001457695.1	95	d__Bacteria;p__Campylobacterota;c__Campylobacteria;o__Campylobacterales;f__Campylobacteraceae;g__Campylobacter_D;s__Campylobacter_D jejuni	97.55	0.911	GCF_001457695.1	95	d__Bacteria;p__Campylobacterota;c__Campylobacteria;o__Campylobacterales;f__Campylobacteraceae;g__Campylobacter_D;s__Campylobacter_D jejuni	97.55	0.911	d__Bacteria;p__Campylobacterota;c__Campylobacteria;o__Campylobacterales;f__Campylobacteraceae;g__Campylobacter_D;s__	taxonomic classification defined by topology and ANI	topological placement and ANI have congruent species assignments	GCA_014305285.1, s__Campylobacter_D jejuni_D, 95.0, 94.48, 0.903; GCA_000163995.1, s__Campylobacter_D jejuni_A, 95.0, 91.15, 0.858; GCF_000254135.1, s__Campylobacter_D coli, 95.0, 86.05, 0.808; GCF_001492295.1, s__Campylobacter_D coli_B, 95.0, 84.04, 0.785; GCF_001687475.2, s__Campylobacter_D hepaticus, 95.0, 83.99, 0.812; GCF_000470055.1, s__Campylobacter_D coli_A, 95.0, 83.66, 0.816; GCF_016806…	84.49	11	N/A	N/A
ATCC_29428_R9_Dorado_FAST_new	d__Bacteria;p__Campylobacterota;c__Campylobacteria;o__Campylobacterales;f__Campylobacteraceae;g__Campylobacter_D;s__Campylobacter_D jejuni	GCF_001457695.1	95	d__Bacteria;p__Campylobacterota;c__Campylobacteria;o__Campylobacterales;f__Campylobacteraceae;g__Campylobacter_D;s__Campylobacter_D jejuni	97.48	0.918	GCF_001457695.1	95	d__Bacteria;p__Campylobacterota;c__Campylobacteria;o__Campylobacterales;f__Campylobacteraceae;g__Campylobacter_D;s__Campylobacter_D jejuni	97.48	0.918	d__Bacteria;p__Campylobacterota;c__Campylobacteria;o__Campylobacterales;f__Campylobacteraceae;g__Campylobacter_D;s__	taxonomic classification defined by topology and ANI	topological placement and ANI have congruent species assignments	GCA_014305285.1, s__Campylobacter_D jejuni_D, 95.0, 94.4, 0.901; GCA_000163995.1, s__Campylobacter_D jejuni_A, 95.0, 91.0, 0.883; GCF_000254135.1, s__Campylobacter_D coli, 95.0, 86.17, 0.801; GCF_001492295.1, s__Campylobacter_D coli_B, 95.0, 84.0, 0.79; GCF_001687475.2, s__Campylobacter_D hepaticus, 95.0, 83.97, 0.82; GCF_016806695.1, s__Campylobacter_D bilis, 95.0, 83.64, 0.866; GCF_000470055.1,…	68.46	11	N/A	N/A
ATCC_29428_R9_Dorado_HAC_new	d__Bacteria;p__Campylobacterota;c__Campylobacteria;o__Campylobacterales;f__Campylobacteraceae;g__Campylobacter_D;s__Campylobacter_D jejuni	GCF_001457695.1	95	d__Bacteria;p__Campylobacterota;c__Campylobacteria;o__Campylobacterales;f__Campylobacteraceae;g__Campylobacter_D;s__Campylobacter_D jejuni	97.51	0.916	GCF_001457695.1	95	d__Bacteria;p__Campylobacterota;c__Campylobacteria;o__Campylobacterales;f__Campylobacteraceae;g__Campylobacter_D;s__Campylobacter_D jejuni	97.51	0.916	d__Bacteria;p__Campylobacterota;c__Campylobacteria;o__Campylobacterales;f__Campylobacteraceae;g__Campylobacter_D;s__	taxonomic classification defined by topology and ANI	topological placement and ANI have congruent species assignments	GCA_014305285.1, s__Campylobacter_D jejuni_D, 95.0, 94.36, 0.909; GCA_000163995.1, s__Campylobacter_D jejuni_A, 95.0, 91.06, 0.868; GCF_000254135.1, s__Campylobacter_D coli, 95.0, 86.3, 0.81; GCF_001687475.2, s__Campylobacter_D hepaticus, 95.0, 84.04, 0.818; GCF_001492295.1, s__Campylobacter_D coli_B, 95.0, 83.96, 0.815; GCF_016806695.1, s__Campylobacter_D bilis, 95.0, 83.65, 0.894; GCF_000470055…	70.25	11	N/A	N/A
ATCC_29428_R9_Dorado_SUP_new	d__Bacteria;p__Campylobacterota;c__Campylobacteria;o__Campylobacterales;f__Campylobacteraceae;g__Campylobacter_D;s__Campylobacter_D jejuni	GCF_001457695.1	95	d__Bacteria;p__Campylobacterota;c__Campylobacteria;o__Campylobacterales;f__Campylobacteraceae;g__Campylobacter_D;s__Campylobacter_D jejuni	97.55	0.922	GCF_001457695.1	95	d__Bacteria;p__Campylobacterota;c__Campylobacteria;o__Campylobacterales;f__Campylobacteraceae;g__Campylobacter_D;s__Campylobacter_D jejuni	97.55	0.922	d__Bacteria;p__Campylobacterota;c__Campylobacteria;o__Campylobacterales;f__Campylobacteraceae;g__Campylobacter_D;s__	taxonomic classification defined by topology and ANI	topological placement and ANI have congruent species assignments	GCA_014305285.1, s__Campylobacter_D jejuni_D, 95.0, 94.48, 0.896; GCA_000163995.1, s__Campylobacter_D jejuni_A, 95.0, 91.1, 0.877; GCF_000254135.1, s__Campylobacter_D coli, 95.0, 86.16, 0.805; GCF_001687475.2, s__Campylobacter_D hepaticus, 95.0, 84.04, 0.82; GCF_001492295.1, s__Campylobacter_D coli_B, 95.0, 84.0, 0.79; GCF_016806695.1, s__Campylobacter_D bilis, 95.0, 83.68, 0.886; GCF_000470055.1…	74.44	11	N/A	N/A
ATCC_29428_Rerio_SUP_new	d__Bacteria;p__Campylobacterota;c__Campylobacteria;o__Campylobacterales;f__Campylobacteraceae;g__Campylobacter_D;s__Campylobacter_D jejuni	GCF_001457695.1	95	d__Bacteria;p__Campylobacterota;c__Campylobacteria;o__Campylobacterales;f__Campylobacteraceae;g__Campylobacter_D;s__Campylobacter_D jejuni	97.58	0.918	GCF_001457695.1	95	d__Bacteria;p__Campylobacterota;c__Campylobacteria;o__Campylobacterales;f__Campylobacteraceae;g__Campylobacter_D;s__Campylobacter_D jejuni	97.58	0.918	d__Bacteria;p__Campylobacterota;c__Campylobacteria;o__Campylobacterales;f__Campylobacteraceae;g__Campylobacter_D;s__	taxonomic classification defined by topology and ANI	topological placement and ANI have congruent species assignments	GCA_014305285.1, s__Campylobacter_D jejuni_D, 95.0, 94.46, 0.901; GCA_000163995.1, s__Campylobacter_D jejuni_A, 95.0, 91.16, 0.875; GCF_000254135.1, s__Campylobacter_D coli, 95.0, 86.24, 0.814; GCF_001492295.1, s__Campylobacter_D coli_B, 95.0, 83.98, 0.795; GCF_001687475.2, s__Campylobacter_D hepaticus, 95.0, 83.95, 0.828; GCF_016806695.1, s__Campylobacter_D bilis, 95.0, 83.78, 0.881; GCF_0004700…	90.98	11	N/A	N/A
ATCC_29428_illumina_new	d__Bacteria;p__Campylobacterota;c__Campylobacteria;o__Campylobacterales;f__Campylobacteraceae;g__Campylobacter_D;s__Campylobacter_D jejuni	GCF_001457695.1	95	d__Bacteria;p__Campylobacterota;c__Campylobacteria;o__Campylobacterales;f__Campylobacteraceae;g__Campylobacter_D;s__Campylobacter_D jejuni	97.75	0.939	GCF_001457695.1	95	d__Bacteria;p__Campylobacterota;c__Campylobacteria;o__Campylobacterales;f__Campylobacteraceae;g__Campylobacter_D;s__Campylobacter_D jejuni	97.75	0.939	d__Bacteria;p__Campylobacterota;c__Campylobacteria;o__Campylobacterales;f__Campylobacteraceae;g__Campylobacter_D;s__	taxonomic classification defined by topology and ANI	topological placement and ANI have congruent species assignments	GCA_014305285.1, s__Campylobacter_D jejuni_D, 95.0, 94.42, 0.877; GCA_000163995.1, s__Campylobacter_D jejuni_A, 95.0, 91.21, 0.903; GCF_000254135.1, s__Campylobacter_D coli, 95.0, 86.03, 0.805; GCF_001687475.2, s__Campylobacter_D hepaticus, 95.0, 84.1, 0.789; GCF_016806695.1, s__Campylobacter_D bilis, 95.0, 83.78, 0.869; GCF_001492295.1, s__Campylobacter_D coli_B, 95.0, 83.61, 0.818; GCF_00047005…	93.11	11	N/A	N/A
ATCC_29428_lrp_R10_Dorado_FAST_new	d__Bacteria;p__Campylobacterota;c__Campylobacteria;o__Campylobacterales;f__Campylobacteraceae;g__Campylobacter_D;s__Campylobacter_D jejuni	GCF_001457695.1	95	d__Bacteria;p__Campylobacterota;c__Campylobacteria;o__Campylobacterales;f__Campylobacteraceae;g__Campylobacter_D;s__Campylobacter_D jejuni	97.62	0.943	GCF_001457695.1	95	d__Bacteria;p__Campylobacterota;c__Campylobacteria;o__Campylobacterales;f__Campylobacteraceae;g__Campylobacter_D;s__Campylobacter_D jejuni	97.62	0.943	d__Bacteria;p__Campylobacterota;c__Campylobacteria;o__Campylobacterales;f__Campylobacteraceae;g__Campylobacter_D;s__	taxonomic classification defined by topology and ANI	topological placement and ANI have congruent species assignments	GCA_014305285.1, s__Campylobacter_D jejuni_D, 95.0, 94.33, 0.875; GCA_000163995.1, s__Campylobacter_D jejuni_A, 95.0, 91.15, 0.875; GCF_000254135.1, s__Campylobacter_D coli, 95.0, 85.94, 0.788; GCF_001687475.2, s__Campylobacter_D hepaticus, 95.0, 84.14, 0.802; GCF_016806695.1, s__Campylobacter_D bilis, 95.0, 83.8, 0.875; GCF_001492295.1, s__Campylobacter_D coli_B, 95.0, 83.72, 0.803; GCF_00047005…	93.11	11	N/A	N/A
ATCC_29428_lrp_R10_Dorado_HAC_new	d__Bacteria;p__Campylobacterota;c__Campylobacteria;o__Campylobacterales;f__Campylobacteraceae;g__Campylobacter_D;s__Campylobacter_D jejuni	GCF_001457695.1	95	d__Bacteria;p__Campylobacterota;c__Campylobacteria;o__Campylobacterales;f__Campylobacteraceae;g__Campylobacter_D;s__Campylobacter_D jejuni	97.62	0.943	GCF_001457695.1	95	d__Bacteria;p__Campylobacterota;c__Campylobacteria;o__Campylobacterales;f__Campylobacteraceae;g__Campylobacter_D;s__Campylobacter_D jejuni	97.62	0.943	d__Bacteria;p__Campylobacterota;c__Campylobacteria;o__Campylobacterales;f__Campylobacteraceae;g__Campylobacter_D;s__	taxonomic classification defined by topology and ANI	topological placement and ANI have congruent species assignments	GCA_014305285.1, s__Campylobacter_D jejuni_D, 95.0, 94.32, 0.875; GCA_000163995.1, s__Campylobacter_D jejuni_A, 95.0, 91.15, 0.875; GCF_000254135.1, s__Campylobacter_D coli, 95.0, 85.94, 0.788; GCF_001687475.2, s__Campylobacter_D hepaticus, 95.0, 84.14, 0.8; GCF_016806695.1, s__Campylobacter_D bilis, 95.0, 83.8, 0.875; GCF_001492295.1, s__Campylobacter_D coli_B, 95.0, 83.71, 0.805; GCF_000470055.…	92.37	11	N/A	N/A
ATCC_29428_lrp_R10_Dorado_SUP_new	d__Bacteria;p__Campylobacterota;c__Campylobacteria;o__Campylobacterales;f__Campylobacteraceae;g__Campylobacter_D;s__Campylobacter_D jejuni	GCF_001457695.1	95	d__Bacteria;p__Campylobacterota;c__Campylobacteria;o__Campylobacterales;f__Campylobacteraceae;g__Campylobacter_D;s__Campylobacter_D jejuni	97.62	0.943	GCF_001457695.1	95	d__Bacteria;p__Campylobacterota;c__Campylobacteria;o__Campylobacterales;f__Campylobacteraceae;g__Campylobacter_D;s__Campylobacter_D jejuni	97.62	0.943	d__Bacteria;p__Campylobacterota;c__Campylobacteria;o__Campylobacterales;f__Campylobacteraceae;g__Campylobacter_D;s__	taxonomic classification defined by topology and ANI	topological placement and ANI have congruent species assignments	GCA_014305285.1, s__Campylobacter_D jejuni_D, 95.0, 94.33, 0.875; GCA_000163995.1, s__Campylobacter_D jejuni_A, 95.0, 91.15, 0.875; GCF_000254135.1, s__Campylobacter_D coli, 95.0, 85.94, 0.788; GCF_001687475.2, s__Campylobacter_D hepaticus, 95.0, 84.14, 0.8; GCF_016806695.1, s__Campylobacter_D bilis, 95.0, 83.8, 0.875; GCF_001492295.1, s__Campylobacter_D coli_B, 95.0, 83.71, 0.805; GCF_000470055.…	93.11	11	N/A	N/A
ATCC_29428_lrp_R10_Rerio_SUP_new	d__Bacteria;p__Campylobacterota;c__Campylobacteria;o__Campylobacterales;f__Campylobacteraceae;g__Campylobacter_D;s__Campylobacter_D jejuni	GCF_001457695.1	95	d__Bacteria;p__Campylobacterota;c__Campylobacteria;o__Campylobacterales;f__Campylobacteraceae;g__Campylobacter_D;s__Campylobacter_D jejuni	97.62	0.943	GCF_001457695.1	95	d__Bacteria;p__Campylobacterota;c__Campylobacteria;o__Campylobacterales;f__Campylobacteraceae;g__Campylobacter_D;s__Campylobacter_D jejuni	97.62	0.943	d__Bacteria;p__Campylobacterota;c__Campylobacteria;o__Campylobacterales;f__Campylobacteraceae;g__Campylobacter_D;s__	taxonomic classification defined by topology and ANI	topological placement and ANI have congruent species assignments	GCA_014305285.1, s__Campylobacter_D jejuni_D, 95.0, 94.33, 0.875; GCA_000163995.1, s__Campylobacter_D jejuni_A, 95.0, 91.15, 0.875; GCF_000254135.1, s__Campylobacter_D coli, 95.0, 85.94, 0.788; GCF_001687475.2, s__Campylobacter_D hepaticus, 95.0, 84.14, 0.8; GCF_016806695.1, s__Campylobacter_D bilis, 95.0, 83.8, 0.875; GCF_001492295.1, s__Campylobacter_D coli_B, 95.0, 83.71, 0.805; GCF_000470055.…	92.37	11	N/A	N/A
ATCC_29428_lrp_R9_Dorado_FAST_new	d__Bacteria;p__Campylobacterota;c__Campylobacteria;o__Campylobacterales;f__Campylobacteraceae;g__Campylobacter_D;s__Campylobacter_D jejuni	GCF_001457695.1	95	d__Bacteria;p__Campylobacterota;c__Campylobacteria;o__Campylobacterales;f__Campylobacteraceae;g__Campylobacter_D;s__Campylobacter_D jejuni	97.6	0.935	GCF_001457695.1	95	d__Bacteria;p__Campylobacterota;c__Campylobacteria;o__Campylobacterales;f__Campylobacteraceae;g__Campylobacter_D;s__Campylobacter_D jejuni	97.6	0.935	d__Bacteria;p__Campylobacterota;c__Campylobacteria;o__Campylobacterales;f__Campylobacteraceae;g__Campylobacter_D;s__	taxonomic classification defined by topology and ANI	topological placement and ANI have congruent species assignments	GCA_014305285.1, s__Campylobacter_D jejuni_D, 95.0, 94.38, 0.868; GCA_000163995.1, s__Campylobacter_D jejuni_A, 95.0, 91.15, 0.884; GCF_000254135.1, s__Campylobacter_D coli, 95.0, 85.89, 0.796; GCF_001687475.2, s__Campylobacter_D hepaticus, 95.0, 84.04, 0.804; GCF_016806695.1, s__Campylobacter_D bilis, 95.0, 83.75, 0.881; GCF_001492295.1, s__Campylobacter_D coli_B, 95.0, 83.69, 0.802; GCF_0004700…	93.11	11	N/A	N/A
ATCC_29428_lrp_R9_Dorado_HAC_new	d__Bacteria;p__Campylobacterota;c__Campylobacteria;o__Campylobacterales;f__Campylobacteraceae;g__Campylobacter_D;s__Campylobacter_D jejuni	GCF_001457695.1	95	d__Bacteria;p__Campylobacterota;c__Campylobacteria;o__Campylobacterales;f__Campylobacteraceae;g__Campylobacter_D;s__Campylobacter_D jejuni	97.62	0.943	GCF_001457695.1	95	d__Bacteria;p__Campylobacterota;c__Campylobacteria;o__Campylobacterales;f__Campylobacteraceae;g__Campylobacter_D;s__Campylobacter_D jejuni	97.62	0.943	d__Bacteria;p__Campylobacterota;c__Campylobacteria;o__Campylobacterales;f__Campylobacteraceae;g__Campylobacter_D;s__	taxonomic classification defined by topology and ANI	topological placement and ANI have congruent species assignments	GCA_014305285.1, s__Campylobacter_D jejuni_D, 95.0, 94.32, 0.875; GCA_000163995.1, s__Campylobacter_D jejuni_A, 95.0, 91.14, 0.877; GCF_000254135.1, s__Campylobacter_D coli, 95.0, 85.94, 0.788; GCF_001687475.2, s__Campylobacter_D hepaticus, 95.0, 84.14, 0.8; GCF_016806695.1, s__Campylobacter_D bilis, 95.0, 83.8, 0.875; GCF_001492295.1, s__Campylobacter_D coli_B, 95.0, 83.7, 0.805; GCF_000470055.1…	93.11	11	N/A	N/A
ATCC_29428_lrp_R9_Dorado_SUP_new	d__Bacteria;p__Campylobacterota;c__Campylobacteria;o__Campylobacterales;f__Campylobacteraceae;g__Campylobacter_D;s__Campylobacter_D jejuni	GCF_001457695.1	95	d__Bacteria;p__Campylobacterota;c__Campylobacteria;o__Campylobacterales;f__Campylobacteraceae;g__Campylobacter_D;s__Campylobacter_D jejuni	97.62	0.943	GCF_001457695.1	95	d__Bacteria;p__Campylobacterota;c__Campylobacteria;o__Campylobacterales;f__Campylobacteraceae;g__Campylobacter_D;s__Campylobacter_D jejuni	97.62	0.943	d__Bacteria;p__Campylobacterota;c__Campylobacteria;o__Campylobacterales;f__Campylobacteraceae;g__Campylobacter_D;s__	taxonomic classification defined by topology and ANI	topological placement and ANI have congruent species assignments	GCA_014305285.1, s__Campylobacter_D jejuni_D, 95.0, 94.32, 0.875; GCA_000163995.1, s__Campylobacter_D jejuni_A, 95.0, 91.14, 0.877; GCF_000254135.1, s__Campylobacter_D coli, 95.0, 85.94, 0.788; GCF_001687475.2, s__Campylobacter_D hepaticus, 95.0, 84.14, 0.8; GCF_016806695.1, s__Campylobacter_D bilis, 95.0, 83.8, 0.875; GCF_001492295.1, s__Campylobacter_D coli_B, 95.0, 83.7, 0.805; GCF_000470055.1…	93.11	11	N/A	N/A
ATCC_29428_srp_R10_Dorado_FAST_new	d__Bacteria;p__Campylobacterota;c__Campylobacteria;o__Campylobacterales;f__Campylobacteraceae;g__Campylobacter_D;s__Campylobacter_D jejuni	GCF_001457695.1	95	d__Bacteria;p__Campylobacterota;c__Campylobacteria;o__Campylobacterales;f__Campylobacteraceae;g__Campylobacter_D;s__Campylobacter_D jejuni	97.64	0.915	GCF_001457695.1	95	d__Bacteria;p__Campylobacterota;c__Campylobacteria;o__Campylobacterales;f__Campylobacteraceae;g__Campylobacter_D;s__Campylobacter_D jejuni	97.64	0.915	d__Bacteria;p__Campylobacterota;c__Campylobacteria;o__Campylobacterales;f__Campylobacteraceae;g__Campylobacter_D;s__	taxonomic classification defined by topology and ANI	topological placement and ANI have congruent species assignments	GCA_014305285.1, s__Campylobacter_D jejuni_D, 95.0, 94.5, 0.905; GCA_000163995.1, s__Campylobacter_D jejuni_A, 95.0, 91.23, 0.863; GCF_000254135.1, s__Campylobacter_D coli, 95.0, 86.07, 0.81; GCF_001687475.2, s__Campylobacter_D hepaticus, 95.0, 84.0, 0.824; GCF_001492295.1, s__Campylobacter_D coli_B, 95.0, 83.94, 0.795; GCF_016806695.1, s__Campylobacter_D bilis, 95.0, 83.87, 0.879; GCF_000470055.…	93.11	11	N/A	N/A
ATCC_29428_srp_R10_Dorado_HAC_new	d__Bacteria;p__Campylobacterota;c__Campylobacteria;o__Campylobacterales;f__Campylobacteraceae;g__Campylobacter_D;s__Campylobacter_D jejuni	GCF_001457695.1	95	d__Bacteria;p__Campylobacterota;c__Campylobacteria;o__Campylobacterales;f__Campylobacteraceae;g__Campylobacter_D;s__Campylobacter_D jejuni	97.63	0.916	GCF_001457695.1	95	d__Bacteria;p__Campylobacterota;c__Campylobacteria;o__Campylobacterales;f__Campylobacteraceae;g__Campylobacter_D;s__Campylobacter_D jejuni	97.63	0.916	d__Bacteria;p__Campylobacterota;c__Campylobacteria;o__Campylobacterales;f__Campylobacteraceae;g__Campylobacter_D;s__	taxonomic classification defined by topology and ANI	topological placement and ANI have congruent species assignments	GCA_014305285.1, s__Campylobacter_D jejuni_D, 95.0, 94.54, 0.897; GCA_000163995.1, s__Campylobacter_D jejuni_A, 95.0, 91.14, 0.879; GCF_000254135.1, s__Campylobacter_D coli, 95.0, 86.3, 0.801; GCF_001687475.2, s__Campylobacter_D hepaticus, 95.0, 84.13, 0.814; GCF_001492295.1, s__Campylobacter_D coli_B, 95.0, 83.89, 0.799; GCF_016806695.1, s__Campylobacter_D bilis, 95.0, 83.67, 0.884; GCF_00047005…	93.11	11	N/A	N/A
ATCC_29428_srp_R10_Dorado_SUP_new	d__Bacteria;p__Campylobacterota;c__Campylobacteria;o__Campylobacterales;f__Campylobacteraceae;g__Campylobacter_D;s__Campylobacter_D jejuni	GCF_001457695.1	95	d__Bacteria;p__Campylobacterota;c__Campylobacteria;o__Campylobacterales;f__Campylobacteraceae;g__Campylobacter_D;s__Campylobacter_D jejuni	97.64	0.915	GCF_001457695.1	95	d__Bacteria;p__Campylobacterota;c__Campylobacteria;o__Campylobacterales;f__Campylobacteraceae;g__Campylobacter_D;s__Campylobacter_D jejuni	97.64	0.915	d__Bacteria;p__Campylobacterota;c__Campylobacteria;o__Campylobacterales;f__Campylobacteraceae;g__Campylobacter_D;s__	taxonomic classification defined by topology and ANI	topological placement and ANI have congruent species assignments	GCA_014305285.1, s__Campylobacter_D jejuni_D, 95.0, 94.52, 0.903; GCA_000163995.1, s__Campylobacter_D jejuni_A, 95.0, 91.23, 0.865; GCF_000254135.1, s__Campylobacter_D coli, 95.0, 86.06, 0.81; GCF_001687475.2, s__Campylobacter_D hepaticus, 95.0, 84.01, 0.824; GCF_001492295.1, s__Campylobacter_D coli_B, 95.0, 83.95, 0.795; GCF_016806695.1, s__Campylobacter_D bilis, 95.0, 83.84, 0.879; GCF_00047005…	93.11	11	N/A	N/A
ATCC_29428_srp_R10_Rerio_SUP_new	d__Bacteria;p__Campylobacterota;c__Campylobacteria;o__Campylobacterales;f__Campylobacteraceae;g__Campylobacter_D;s__Campylobacter_D jejuni	GCF_001457695.1	95	d__Bacteria;p__Campylobacterota;c__Campylobacteria;o__Campylobacterales;f__Campylobacteraceae;g__Campylobacter_D;s__Campylobacter_D jejuni	97.64	0.916	GCF_001457695.1	95	d__Bacteria;p__Campylobacterota;c__Campylobacteria;o__Campylobacterales;f__Campylobacteraceae;g__Campylobacter_D;s__Campylobacter_D jejuni	97.64	0.916	d__Bacteria;p__Campylobacterota;c__Campylobacteria;o__Campylobacterales;f__Campylobacteraceae;g__Campylobacter_D;s__	taxonomic classification defined by topology and ANI	topological placement and ANI have congruent species assignments	GCA_014305285.1, s__Campylobacter_D jejuni_D, 95.0, 94.56, 0.899; GCA_000163995.1, s__Campylobacter_D jejuni_A, 95.0, 91.15, 0.883; GCF_000254135.1, s__Campylobacter_D coli, 95.0, 86.22, 0.816; GCF_001492295.1, s__Campylobacter_D coli_B, 95.0, 84.04, 0.788; GCF_001687475.2, s__Campylobacter_D hepaticus, 95.0, 83.95, 0.83; GCF_016806695.1, s__Campylobacter_D bilis, 95.0, 83.8, 0.881; GCF_000470055…	93.11	11	N/A	N/A
ATCC_29428_srp_R9_Dorado_FAST_new	d__Bacteria;p__Campylobacterota;c__Campylobacteria;o__Campylobacterales;f__Campylobacteraceae;g__Campylobacter_D;s__Campylobacter_D jejuni	GCF_001457695.1	95	d__Bacteria;p__Campylobacterota;c__Campylobacteria;o__Campylobacterales;f__Campylobacteraceae;g__Campylobacter_D;s__Campylobacter_D jejuni	97.65	0.925	GCF_001457695.1	95	d__Bacteria;p__Campylobacterota;c__Campylobacteria;o__Campylobacterales;f__Campylobacteraceae;g__Campylobacter_D;s__Campylobacter_D jejuni	97.65	0.925	d__Bacteria;p__Campylobacterota;c__Campylobacteria;o__Campylobacterales;f__Campylobacteraceae;g__Campylobacter_D;s__	taxonomic classification defined by topology and ANI	topological placement and ANI have congruent species assignments	GCA_014305285.1, s__Campylobacter_D jejuni_D, 95.0, 94.51, 0.897; GCA_000163995.1, s__Campylobacter_D jejuni_A, 95.0, 91.16, 0.875; GCF_000254135.1, s__Campylobacter_D coli, 95.0, 86.19, 0.799; GCF_001687475.2, s__Campylobacter_D hepaticus, 95.0, 84.1, 0.82; GCF_001492295.1, s__Campylobacter_D coli_B, 95.0, 83.97, 0.79; GCF_016806695.1, s__Campylobacter_D bilis, 95.0, 83.78, 0.873; GCF_000470055.…	92.37	11	N/A	N/A
ATCC_29428_srp_R9_Dorado_HAC_new	d__Bacteria;p__Campylobacterota;c__Campylobacteria;o__Campylobacterales;f__Campylobacteraceae;g__Campylobacter_D;s__Campylobacter_D jejuni	GCF_001457695.1	95	d__Bacteria;p__Campylobacterota;c__Campylobacteria;o__Campylobacterales;f__Campylobacteraceae;g__Campylobacter_D;s__Campylobacter_D jejuni	97.73	0.923	GCF_001457695.1	95	d__Bacteria;p__Campylobacterota;c__Campylobacteria;o__Campylobacterales;f__Campylobacteraceae;g__Campylobacter_D;s__Campylobacter_D jejuni	97.73	0.923	d__Bacteria;p__Campylobacterota;c__Campylobacteria;o__Campylobacterales;f__Campylobacteraceae;g__Campylobacter_D;s__	taxonomic classification defined by topology and ANI	topological placement and ANI have congruent species assignments	GCA_014305285.1, s__Campylobacter_D jejuni_D, 95.0, 94.56, 0.896; GCA_000163995.1, s__Campylobacter_D jejuni_A, 95.0, 91.18, 0.874; GCF_000254135.1, s__Campylobacter_D coli, 95.0, 86.1, 0.801; GCF_001687475.2, s__Campylobacter_D hepaticus, 95.0, 84.14, 0.812; GCF_001492295.1, s__Campylobacter_D coli_B, 95.0, 83.91, 0.801; GCF_016806695.1, s__Campylobacter_D bilis, 95.0, 83.76, 0.881; GCF_00047005…	93.11	11	N/A	N/A
ATCC_29428_srp_R9_Dorado_SUP_new	d__Bacteria;p__Campylobacterota;c__Campylobacteria;o__Campylobacterales;f__Campylobacteraceae;g__Campylobacter_D;s__Campylobacter_D jejuni	GCF_001457695.1	95	d__Bacteria;p__Campylobacterota;c__Campylobacteria;o__Campylobacterales;f__Campylobacteraceae;g__Campylobacter_D;s__Campylobacter_D jejuni	97.69	0.913	GCF_001457695.1	95	d__Bacteria;p__Campylobacterota;c__Campylobacteria;o__Campylobacterales;f__Campylobacteraceae;g__Campylobacter_D;s__Campylobacter_D jejuni	97.69	0.913	d__Bacteria;p__Campylobacterota;c__Campylobacteria;o__Campylobacterales;f__Campylobacteraceae;g__Campylobacter_D;s__	taxonomic classification defined by topology and ANI	topological placement and ANI have congruent species assignments	GCA_014305285.1, s__Campylobacter_D jejuni_D, 95.0, 94.57, 0.894; GCA_000163995.1, s__Campylobacter_D jejuni_A, 95.0, 91.14, 0.879; GCF_000254135.1, s__Campylobacter_D coli, 95.0, 86.13, 0.803; GCF_001687475.2, s__Campylobacter_D hepaticus, 95.0, 84.1, 0.802; GCF_001492295.1, s__Campylobacter_D coli_B, 95.0, 84.03, 0.792; GCF_016806695.1, s__Campylobacter_D bilis, 95.0, 83.8, 0.884; GCF_000470055…	93.11	11	N/A	N/A
ATCC_700819_camjej_refseq_new	d__Bacteria;p__Campylobacterota;c__Campylobacteria;o__Campylobacterales;f__Campylobacteraceae;g__Campylobacter_D;s__Campylobacter_D jejuni	GCF_001457695.1	95	d__Bacteria;p__Campylobacterota;c__Campylobacteria;o__Campylobacterales;f__Campylobacteraceae;g__Campylobacter_D;s__Campylobacter_D jejuni	97.66	0.938	GCF_001457695.1	95	d__Bacteria;p__Campylobacterota;c__Campylobacteria;o__Campylobacterales;f__Campylobacteraceae;g__Campylobacter_D;s__Campylobacter_D jejuni	97.66	0.938	d__Bacteria;p__Campylobacterota;c__Campylobacteria;o__Campylobacterales;f__Campylobacteraceae;g__Campylobacter_D;s__	taxonomic classification defined by topology and ANI	topological placement and ANI have congruent species assignments	GCA_014305285.1, s__Campylobacter_D jejuni_D, 95.0, 94.31, 0.866; GCA_000163995.1, s__Campylobacter_D jejuni_A, 95.0, 91.0, 0.894; GCF_000254135.1, s__Campylobacter_D coli, 95.0, 86.11, 0.792; GCF_001687475.2, s__Campylobacter_D hepaticus, 95.0, 84.09, 0.812; GCF_016806695.1, s__Campylobacter_D bilis, 95.0, 83.8, 0.86; GCF_001492295.1, s__Campylobacter_D coli_B, 95.0, 83.71, 0.799; GCF_000470055.…	93.11	11	N/A	N/A

## Sheet: entfae
user_genome	classification	fastani_reference	fastani_reference_radius	fastani_taxonomy	fastani_ani	fastani_af	closest_placement_reference	closest_placement_radius	closest_placement_taxonomy	closest_placement_ani	closest_placement_af	pplacer_taxonomy	classification_method	note	other_related_references(genome_id,species_name,radius,ANI,AF)	msa_percent	translation_table	red_value	warnings
609596-20-s-R10-Dorado-FAST-Medaka-2.0	d__Bacteria;p__Bacillota;c__Bacilli;o__Lactobacillales;f__Enterococcaceae;g__Enterococcus_B;s__Enterococcus_B faecium	GCF_001544255.1	95	d__Bacteria;p__Bacillota;c__Bacilli;o__Lactobacillales;f__Enterococcaceae;g__Enterococcus_B;s__Enterococcus_B faecium	99.18	0.946	GCF_001544255.1	95	d__Bacteria;p__Bacillota;c__Bacilli;o__Lactobacillales;f__Enterococcaceae;g__Enterococcus_B;s__Enterococcus_B faecium	99.18	0.946	d__Bacteria;p__Bacillota;c__Bacilli;o__Lactobacillales;f__Enterococcaceae;g__Enterococcus_B;s__	taxonomic classification defined by topology and ANI	topological placement and ANI have congruent species assignments	GCF_015751045.1, s__Enterococcus_B lactis, 95.0, 94.32, 0.828; GCF_001544215.1, s__Enterococcus_B durans, 95.0, 82.29, 0.425; GCF_011038845.1, s__Enterococcus_B sp011038845, 95.0, 81.67, 0.547; GCF_000271405.2, s__Enterococcus_B hirae, 95.0, 80.69, 0.411; GCA_015680865.1, s__Enterococcus_B lacertideformus, 95.0, 80.22, 0.422; GCF_001886265.1, s__Enterococcus_B thailandicus, 95.0, 80.16, 0.382; GC…	75.95	11	N/A	N/A
609596-20-s-R10-Dorado-FAST-flye	d__Bacteria;p__Bacillota;c__Bacilli;o__Lactobacillales;f__Enterococcaceae;g__Enterococcus_B;s__Enterococcus_B faecium	GCF_001544255.1	95	d__Bacteria;p__Bacillota;c__Bacilli;o__Lactobacillales;f__Enterococcaceae;g__Enterococcus_B;s__Enterococcus_B faecium	99.18	0.946	GCF_001544255.1	95	d__Bacteria;p__Bacillota;c__Bacilli;o__Lactobacillales;f__Enterococcaceae;g__Enterococcus_B;s__Enterococcus_B faecium	99.18	0.946	d__Bacteria;p__Bacillota;c__Bacilli;o__Lactobacillales;f__Enterococcaceae;g__Enterococcus_B;s__	taxonomic classification defined by topology and ANI	topological placement and ANI have congruent species assignments	GCF_015751045.1, s__Enterococcus_B lactis, 95.0, 94.32, 0.828; GCF_001544215.1, s__Enterococcus_B durans, 95.0, 82.29, 0.425; GCF_011038845.1, s__Enterococcus_B sp011038845, 95.0, 81.67, 0.547; GCF_000271405.2, s__Enterococcus_B hirae, 95.0, 80.69, 0.411; GCA_015680865.1, s__Enterococcus_B lacertideformus, 95.0, 80.22, 0.422; GCF_001886265.1, s__Enterococcus_B thailandicus, 95.0, 80.16, 0.382; GC…	75.95	11	N/A	N/A
609596-20-s-R10-Dorado-FAST-new	d__Bacteria;p__Bacillota;c__Bacilli;o__Lactobacillales;f__Enterococcaceae;g__Enterococcus_B;s__Enterococcus_B faecium	GCF_001544255.1	95	d__Bacteria;p__Bacillota;c__Bacilli;o__Lactobacillales;f__Enterococcaceae;g__Enterococcus_B;s__Enterococcus_B faecium	99.28	0.948	GCF_001544255.1	95	d__Bacteria;p__Bacillota;c__Bacilli;o__Lactobacillales;f__Enterococcaceae;g__Enterococcus_B;s__Enterococcus_B faecium	99.28	0.948	d__Bacteria;p__Bacillota;c__Bacilli;o__Lactobacillales;f__Enterococcaceae;g__Enterococcus_B;s__	taxonomic classification defined by topology and ANI	topological placement and ANI have congruent species assignments	GCF_015751045.1, s__Enterococcus_B lactis, 95.0, 94.42, 0.832; GCF_001544215.1, s__Enterococcus_B durans, 95.0, 82.34, 0.426; GCF_011038845.1, s__Enterococcus_B sp011038845, 95.0, 81.66, 0.554; GCF_000271405.2, s__Enterococcus_B hirae, 95.0, 80.72, 0.415; GCF_013394305.1, s__Enterococcus_B pernyi, 96.3614, 80.37, 0.327; GCA_015680865.1, s__Enterococcus_B lacertideformus, 95.0, 80.36, 0.416; GCF_0…	92.79	11	N/A	N/A
609596-20-s-R10-Dorado-HAC-flye	d__Bacteria;p__Bacillota;c__Bacilli;o__Lactobacillales;f__Enterococcaceae;g__Enterococcus_B;s__Enterococcus_B faecium	GCF_001544255.1	95	d__Bacteria;p__Bacillota;c__Bacilli;o__Lactobacillales;f__Enterococcaceae;g__Enterococcus_B;s__Enterococcus_B faecium	99.25	0.953	GCF_001544255.1	95	d__Bacteria;p__Bacillota;c__Bacilli;o__Lactobacillales;f__Enterococcaceae;g__Enterococcus_B;s__Enterococcus_B faecium	99.25	0.953	d__Bacteria;p__Bacillota;c__Bacilli;o__Lactobacillales;f__Enterococcaceae;g__Enterococcus_B;s__	taxonomic classification defined by topology and ANI	topological placement and ANI have congruent species assignments	GCF_015751045.1, s__Enterococcus_B lactis, 95.0, 94.43, 0.837; GCF_001544215.1, s__Enterococcus_B durans, 95.0, 82.25, 0.433; GCF_011038845.1, s__Enterococcus_B sp011038845, 95.0, 81.71, 0.557; GCF_000271405.2, s__Enterococcus_B hirae, 95.0, 80.65, 0.412; GCA_015680865.1, s__Enterococcus_B lacertideformus, 95.0, 80.31, 0.413; GCF_003957375.1, s__Enterococcus_B mundtii_C, 96.247, 80.25, 0.372; GCF…	95.61	11	N/A	N/A
609596-20-s-R10-Dorado-HAC-new	d__Bacteria;p__Bacillota;c__Bacilli;o__Lactobacillales;f__Enterococcaceae;g__Enterococcus_B;s__Enterococcus_B faecium	GCF_001544255.1	95	d__Bacteria;p__Bacillota;c__Bacilli;o__Lactobacillales;f__Enterococcaceae;g__Enterococcus_B;s__Enterococcus_B faecium	99.25	0.949	GCF_001544255.1	95	d__Bacteria;p__Bacillota;c__Bacilli;o__Lactobacillales;f__Enterococcaceae;g__Enterococcus_B;s__Enterococcus_B faecium	99.25	0.949	d__Bacteria;p__Bacillota;c__Bacilli;o__Lactobacillales;f__Enterococcaceae;g__Enterococcus_B;s__	taxonomic classification defined by topology and ANI	topological placement and ANI have congruent species assignments	GCF_015751045.1, s__Enterococcus_B lactis, 95.0, 94.42, 0.826; GCF_001544215.1, s__Enterococcus_B durans, 95.0, 82.19, 0.431; GCF_011038845.1, s__Enterococcus_B sp011038845, 95.0, 81.66, 0.546; GCF_000271405.2, s__Enterococcus_B hirae, 95.0, 80.68, 0.411; GCA_015680865.1, s__Enterococcus_B lacertideformus, 95.0, 80.33, 0.409; GCF_003957375.1, s__Enterococcus_B mundtii_C, 96.247, 80.25, 0.368; GCF…	96.46	11	N/A	N/A
609596-20-s-R10-Dorado-SUP-Medaka-2.0	d__Bacteria;p__Bacillota;c__Bacilli;o__Lactobacillales;f__Enterococcaceae;g__Enterococcus_B;s__Enterococcus_B faecium	GCF_001544255.1	95	d__Bacteria;p__Bacillota;c__Bacilli;o__Lactobacillales;f__Enterococcaceae;g__Enterococcus_B;s__Enterococcus_B faecium	99.25	0.949	GCF_001544255.1	95	d__Bacteria;p__Bacillota;c__Bacilli;o__Lactobacillales;f__Enterococcaceae;g__Enterococcus_B;s__Enterococcus_B faecium	99.25	0.949	d__Bacteria;p__Bacillota;c__Bacilli;o__Lactobacillales;f__Enterococcaceae;g__Enterococcus_B;s__	taxonomic classification defined by topology and ANI	topological placement and ANI have congruent species assignments	GCF_015751045.1, s__Enterococcus_B lactis, 95.0, 94.42, 0.826; GCF_001544215.1, s__Enterococcus_B durans, 95.0, 82.29, 0.431; GCF_011038845.1, s__Enterococcus_B sp011038845, 95.0, 81.64, 0.548; GCF_000271405.2, s__Enterococcus_B hirae, 95.0, 80.69, 0.411; GCA_015680865.1, s__Enterococcus_B lacertideformus, 95.0, 80.3, 0.409; GCF_003957375.1, s__Enterococcus_B mundtii_C, 96.247, 80.25, 0.369; GCF_…	96.46	11	N/A	N/A
609596-20-s-R10-Dorado-SUP-flye	d__Bacteria;p__Bacillota;c__Bacilli;o__Lactobacillales;f__Enterococcaceae;g__Enterococcus_B;s__Enterococcus_B faecium	GCF_001544255.1	95	d__Bacteria;p__Bacillota;c__Bacilli;o__Lactobacillales;f__Enterococcaceae;g__Enterococcus_B;s__Enterococcus_B faecium	99.24	0.951	GCF_001544255.1	95	d__Bacteria;p__Bacillota;c__Bacilli;o__Lactobacillales;f__Enterococcaceae;g__Enterococcus_B;s__Enterococcus_B faecium	99.24	0.951	d__Bacteria;p__Bacillota;c__Bacilli;o__Lactobacillales;f__Enterococcaceae;g__Enterococcus_B;s__	taxonomic classification defined by topology and ANI	topological placement and ANI have congruent species assignments	GCF_015751045.1, s__Enterococcus_B lactis, 95.0, 94.46, 0.826; GCF_001544215.1, s__Enterococcus_B durans, 95.0, 82.28, 0.432; GCF_011038845.1, s__Enterococcus_B sp011038845, 95.0, 81.65, 0.545; GCF_000271405.2, s__Enterococcus_B hirae, 95.0, 80.64, 0.408; GCA_015680865.1, s__Enterococcus_B lacertideformus, 95.0, 80.31, 0.408; GCF_003957375.1, s__Enterococcus_B mundtii_C, 96.247, 80.3, 0.369; GCF_…	96.46	11	N/A	N/A
609596-20-s-R10-Dorado-SUP-new	d__Bacteria;p__Bacillota;c__Bacilli;o__Lactobacillales;f__Enterococcaceae;g__Enterococcus_B;s__Enterococcus_B faecium	GCF_001544255.1	95	d__Bacteria;p__Bacillota;c__Bacilli;o__Lactobacillales;f__Enterococcaceae;g__Enterococcus_B;s__Enterococcus_B faecium	99.24	0.949	GCF_001544255.1	95	d__Bacteria;p__Bacillota;c__Bacilli;o__Lactobacillales;f__Enterococcaceae;g__Enterococcus_B;s__Enterococcus_B faecium	99.24	0.949	d__Bacteria;p__Bacillota;c__Bacilli;o__Lactobacillales;f__Enterococcaceae;g__Enterococcus_B;s__	taxonomic classification defined by topology and ANI	topological placement and ANI have congruent species assignments	GCF_015751045.1, s__Enterococcus_B lactis, 95.0, 94.44, 0.825; GCF_001544215.1, s__Enterococcus_B durans, 95.0, 82.23, 0.43; GCF_011038845.1, s__Enterococcus_B sp011038845, 95.0, 81.63, 0.548; GCF_000271405.2, s__Enterococcus_B hirae, 95.0, 80.71, 0.409; GCA_015680865.1, s__Enterococcus_B lacertideformus, 95.0, 80.33, 0.409; GCF_003957375.1, s__Enterococcus_B mundtii_C, 96.247, 80.25, 0.368; GCF_…	96.46	11	N/A	N/A
609596-20-s-R10-Guppy-FAST-Medaka-2.0	d__Bacteria;p__Bacillota;c__Bacilli;o__Lactobacillales;f__Enterococcaceae;g__Enterococcus_B;s__Enterococcus_B faecium	GCF_001544255.1	95	d__Bacteria;p__Bacillota;c__Bacilli;o__Lactobacillales;f__Enterococcaceae;g__Enterococcus_B;s__Enterococcus_B faecium	99.21	0.954	GCF_001544255.1	95	d__Bacteria;p__Bacillota;c__Bacilli;o__Lactobacillales;f__Enterococcaceae;g__Enterococcus_B;s__Enterococcus_B faecium	99.21	0.954	d__Bacteria;p__Bacillota;c__Bacilli;o__Lactobacillales;f__Enterococcaceae;g__Enterococcus_B;s__	taxonomic classification defined by topology and ANI	topological placement and ANI have congruent species assignments	GCF_015751045.1, s__Enterococcus_B lactis, 95.0, 94.44, 0.83; GCF_001544215.1, s__Enterococcus_B durans, 95.0, 82.23, 0.432; GCF_011038845.1, s__Enterococcus_B sp011038845, 95.0, 81.69, 0.538; GCF_000271405.2, s__Enterococcus_B hirae, 95.0, 80.54, 0.41; GCA_015680865.1, s__Enterococcus_B lacertideformus, 95.0, 80.26, 0.416; GCF_003957375.1, s__Enterococcus_B mundtii_C, 96.247, 80.12, 0.37; GCF_00…	86.24	11	N/A	N/A
609596-20-s-R10-Guppy-FAST-flye	d__Bacteria;p__Bacillota;c__Bacilli;o__Lactobacillales;f__Enterococcaceae;g__Enterococcus_B;s__Enterococcus_B faecium	GCF_001544255.1	95	d__Bacteria;p__Bacillota;c__Bacilli;o__Lactobacillales;f__Enterococcaceae;g__Enterococcus_B;s__Enterococcus_B faecium	99.19	0.948	GCF_001544255.1	95	d__Bacteria;p__Bacillota;c__Bacilli;o__Lactobacillales;f__Enterococcaceae;g__Enterococcus_B;s__Enterococcus_B faecium	99.19	0.948	d__Bacteria;p__Bacillota;c__Bacilli;o__Lactobacillales;f__Enterococcaceae;g__Enterococcus_B;s__	taxonomic classification defined by topology and ANI	topological placement and ANI have congruent species assignments	GCF_015751045.1, s__Enterococcus_B lactis, 95.0, 94.39, 0.836; GCF_001544215.1, s__Enterococcus_B durans, 95.0, 82.22, 0.435; GCF_011038845.1, s__Enterococcus_B sp011038845, 95.0, 81.66, 0.541; GCF_000271405.2, s__Enterococcus_B hirae, 95.0, 80.59, 0.4; GCF_001886265.1, s__Enterococcus_B thailandicus, 95.0, 80.17, 0.384; GCA_015680865.1, s__Enterococcus_B lacertideformus, 95.0, 80.16, 0.414; GCF_…	75.63	11	N/A	N/A
609596-20-s-R10-Guppy-FAST-new	d__Bacteria;p__Bacillota;c__Bacilli;o__Lactobacillales;f__Enterococcaceae;g__Enterococcus_B;s__Enterococcus_B faecium	GCF_001544255.1	95	d__Bacteria;p__Bacillota;c__Bacilli;o__Lactobacillales;f__Enterococcaceae;g__Enterococcus_B;s__Enterococcus_B faecium	99.25	0.952	GCF_001544255.1	95	d__Bacteria;p__Bacillota;c__Bacilli;o__Lactobacillales;f__Enterococcaceae;g__Enterococcus_B;s__Enterococcus_B faecium	99.25	0.952	d__Bacteria;p__Bacillota;c__Bacilli;o__Lactobacillales;f__Enterococcaceae;g__Enterococcus_B;s__	taxonomic classification defined by topology and ANI	topological placement and ANI have congruent species assignments	GCF_015751045.1, s__Enterococcus_B lactis, 95.0, 94.42, 0.836; GCF_001544215.1, s__Enterococcus_B durans, 95.0, 82.24, 0.433; GCF_011038845.1, s__Enterococcus_B sp011038845, 95.0, 81.73, 0.555; GCF_000271405.2, s__Enterococcus_B hirae, 95.0, 80.55, 0.42; GCA_015680865.1, s__Enterococcus_B lacertideformus, 95.0, 80.36, 0.418; GCF_007990225.1, s__Enterococcus_B villorum, 95.0, 80.27, 0.39; GCF_0018…	96.25	11	N/A	N/A
609596-20-s-R10-Guppy-HAC-Medaka-2.0	d__Bacteria;p__Bacillota;c__Bacilli;o__Lactobacillales;f__Enterococcaceae;g__Enterococcus_B;s__Enterococcus_B faecium	GCF_001544255.1	95	d__Bacteria;p__Bacillota;c__Bacilli;o__Lactobacillales;f__Enterococcaceae;g__Enterococcus_B;s__Enterococcus_B faecium	99.21	0.958	GCF_001544255.1	95	d__Bacteria;p__Bacillota;c__Bacilli;o__Lactobacillales;f__Enterococcaceae;g__Enterococcus_B;s__Enterococcus_B faecium	99.21	0.958	d__Bacteria;p__Bacillota;c__Bacilli;o__Lactobacillales;f__Enterococcaceae;g__Enterococcus_B;s__	taxonomic classification defined by topology and ANI	topological placement and ANI have congruent species assignments	GCF_015751045.1, s__Enterococcus_B lactis, 95.0, 94.42, 0.825; GCF_001544215.1, s__Enterococcus_B durans, 95.0, 82.24, 0.429; GCF_011038845.1, s__Enterococcus_B sp011038845, 95.0, 81.7, 0.541; GCF_000271405.2, s__Enterococcus_B hirae, 95.0, 80.68, 0.416; GCA_015680865.1, s__Enterococcus_B lacertideformus, 95.0, 80.31, 0.413; GCF_003957375.1, s__Enterococcus_B mundtii_C, 96.247, 80.23, 0.376; GCF_…	96.46	11	N/A	N/A
609596-20-s-R10-Guppy-HAC-flye	d__Bacteria;p__Bacillota;c__Bacilli;o__Lactobacillales;f__Enterococcaceae;g__Enterococcus_B;s__Enterococcus_B faecium	GCF_001544255.1	95	d__Bacteria;p__Bacillota;c__Bacilli;o__Lactobacillales;f__Enterococcaceae;g__Enterococcus_B;s__Enterococcus_B faecium	99.21	0.958	GCF_001544255.1	95	d__Bacteria;p__Bacillota;c__Bacilli;o__Lactobacillales;f__Enterococcaceae;g__Enterococcus_B;s__Enterococcus_B faecium	99.21	0.958	d__Bacteria;p__Bacillota;c__Bacilli;o__Lactobacillales;f__Enterococcaceae;g__Enterococcus_B;s__	taxonomic classification defined by topology and ANI	topological placement and ANI have congruent species assignments	GCF_015751045.1, s__Enterococcus_B lactis, 95.0, 94.43, 0.825; GCF_001544215.1, s__Enterococcus_B durans, 95.0, 82.22, 0.435; GCF_011038845.1, s__Enterococcus_B sp011038845, 95.0, 81.69, 0.541; GCF_000271405.2, s__Enterococcus_B hirae, 95.0, 80.68, 0.417; GCA_015680865.1, s__Enterococcus_B lacertideformus, 95.0, 80.32, 0.414; GCF_003957375.1, s__Enterococcus_B mundtii_C, 96.247, 80.24, 0.374; GCF…	96.44	11	N/A	N/A
609596-20-s-R10-Guppy-HAC-new	d__Bacteria;p__Bacillota;c__Bacilli;o__Lactobacillales;f__Enterococcaceae;g__Enterococcus_B;s__Enterococcus_B faecium	GCF_001544255.1	95	d__Bacteria;p__Bacillota;c__Bacilli;o__Lactobacillales;f__Enterococcaceae;g__Enterococcus_B;s__Enterococcus_B faecium	99.21	0.958	GCF_001544255.1	95	d__Bacteria;p__Bacillota;c__Bacilli;o__Lactobacillales;f__Enterococcaceae;g__Enterococcus_B;s__Enterococcus_B faecium	99.21	0.958	d__Bacteria;p__Bacillota;c__Bacilli;o__Lactobacillales;f__Enterococcaceae;g__Enterococcus_B;s__	taxonomic classification defined by topology and ANI	topological placement and ANI have congruent species assignments	GCF_015751045.1, s__Enterococcus_B lactis, 95.0, 94.43, 0.825; GCF_001544215.1, s__Enterococcus_B durans, 95.0, 82.24, 0.428; GCF_011038845.1, s__Enterococcus_B sp011038845, 95.0, 81.69, 0.539; GCF_000271405.2, s__Enterococcus_B hirae, 95.0, 80.72, 0.415; GCA_015680865.1, s__Enterococcus_B lacertideformus, 95.0, 80.37, 0.413; GCF_003957375.1, s__Enterococcus_B mundtii_C, 96.247, 80.21, 0.374; GCF…	96.44	11	N/A	N/A
609596-20-s-R10-Guppy-SUP-Medaka-2.0	d__Bacteria;p__Bacillota;c__Bacilli;o__Lactobacillales;f__Enterococcaceae;g__Enterococcus_B;s__Enterococcus_B faecium	GCF_001544255.1	95	d__Bacteria;p__Bacillota;c__Bacilli;o__Lactobacillales;f__Enterococcaceae;g__Enterococcus_B;s__Enterococcus_B faecium	99.28	0.947	GCF_001544255.1	95	d__Bacteria;p__Bacillota;c__Bacilli;o__Lactobacillales;f__Enterococcaceae;g__Enterococcus_B;s__Enterococcus_B faecium	99.28	0.947	d__Bacteria;p__Bacillota;c__Bacilli;o__Lactobacillales;f__Enterococcaceae;g__Enterococcus_B;s__	taxonomic classification defined by topology and ANI	topological placement and ANI have congruent species assignments	GCF_015751045.1, s__Enterococcus_B lactis, 95.0, 94.44, 0.831; GCF_001544215.1, s__Enterococcus_B durans, 95.0, 82.39, 0.425; GCF_011038845.1, s__Enterococcus_B sp011038845, 95.0, 81.68, 0.552; GCF_000271405.2, s__Enterococcus_B hirae, 95.0, 80.7, 0.411; GCA_015680865.1, s__Enterococcus_B lacertideformus, 95.0, 80.39, 0.418; GCF_013394305.1, s__Enterococcus_B pernyi, 96.3614, 80.28, 0.335; GCF_00…	96.46	11	N/A	N/A
609596-20-s-R10-Guppy-SUP-flye	d__Bacteria;p__Bacillota;c__Bacilli;o__Lactobacillales;f__Enterococcaceae;g__Enterococcus_B;s__Enterococcus_B faecium	GCF_001544255.1	95	d__Bacteria;p__Bacillota;c__Bacilli;o__Lactobacillales;f__Enterococcaceae;g__Enterococcus_B;s__Enterococcus_B faecium	99.27	0.948	GCF_001544255.1	95	d__Bacteria;p__Bacillota;c__Bacilli;o__Lactobacillales;f__Enterococcaceae;g__Enterococcus_B;s__Enterococcus_B faecium	99.27	0.948	d__Bacteria;p__Bacillota;c__Bacilli;o__Lactobacillales;f__Enterococcaceae;g__Enterococcus_B;s__	taxonomic classification defined by topology and ANI	topological placement and ANI have congruent species assignments	GCF_015751045.1, s__Enterococcus_B lactis, 95.0, 94.44, 0.831; GCF_001544215.1, s__Enterococcus_B durans, 95.0, 82.4, 0.427; GCF_011038845.1, s__Enterococcus_B sp011038845, 95.0, 81.68, 0.55; GCF_000271405.2, s__Enterococcus_B hirae, 95.0, 80.69, 0.407; GCA_015680865.1, s__Enterococcus_B lacertideformus, 95.0, 80.36, 0.413; GCF_001886265.1, s__Enterococcus_B thailandicus, 95.0, 80.3, 0.401; GCF_0…	96.46	11	N/A	N/A
609596-20-s-R10-Guppy-SUP-new	d__Bacteria;p__Bacillota;c__Bacilli;o__Lactobacillales;f__Enterococcaceae;g__Enterococcus_B;s__Enterococcus_B faecium	GCF_001544255.1	95	d__Bacteria;p__Bacillota;c__Bacilli;o__Lactobacillales;f__Enterococcaceae;g__Enterococcus_B;s__Enterococcus_B faecium	99.27	0.948	GCF_001544255.1	95	d__Bacteria;p__Bacillota;c__Bacilli;o__Lactobacillales;f__Enterococcaceae;g__Enterococcus_B;s__Enterococcus_B faecium	99.27	0.948	d__Bacteria;p__Bacillota;c__Bacilli;o__Lactobacillales;f__Enterococcaceae;g__Enterococcus_B;s__	taxonomic classification defined by topology and ANI	topological placement and ANI have congruent species assignments	GCF_015751045.1, s__Enterococcus_B lactis, 95.0, 94.45, 0.83; GCF_001544215.1, s__Enterococcus_B durans, 95.0, 82.41, 0.425; GCF_011038845.1, s__Enterococcus_B sp011038845, 95.0, 81.66, 0.554; GCF_000271405.2, s__Enterococcus_B hirae, 95.0, 80.72, 0.413; GCA_015680865.1, s__Enterococcus_B lacertideformus, 95.0, 80.39, 0.418; GCF_013394305.1, s__Enterococcus_B pernyi, 96.3614, 80.27, 0.335; GCF_00…	96.46	11	N/A	N/A
609596-20-s-R10-Rerio-SUP-new	d__Bacteria;p__Bacillota;c__Bacilli;o__Lactobacillales;f__Enterococcaceae;g__Enterococcus_B;s__Enterococcus_B faecium	GCF_001544255.1	95	d__Bacteria;p__Bacillota;c__Bacilli;o__Lactobacillales;f__Enterococcaceae;g__Enterococcus_B;s__Enterococcus_B faecium	99.26	0.951	GCF_001544255.1	95	d__Bacteria;p__Bacillota;c__Bacilli;o__Lactobacillales;f__Enterococcaceae;g__Enterococcus_B;s__Enterococcus_B faecium	99.26	0.951	d__Bacteria;p__Bacillota;c__Bacilli;o__Lactobacillales;f__Enterococcaceae;g__Enterococcus_B;s__	taxonomic classification defined by topology and ANI	topological placement and ANI have congruent species assignments	GCF_015751045.1, s__Enterococcus_B lactis, 95.0, 94.46, 0.826; GCF_001544215.1, s__Enterococcus_B durans, 95.0, 82.34, 0.423; GCF_011038845.1, s__Enterococcus_B sp011038845, 95.0, 81.66, 0.548; GCF_000271405.2, s__Enterococcus_B hirae, 95.0, 80.59, 0.408; GCA_015680865.1, s__Enterococcus_B lacertideformus, 95.0, 80.33, 0.416; GCF_001886265.1, s__Enterococcus_B thailandicus, 95.0, 80.15, 0.399; GC…	95.63	11	N/A	N/A
609596-20-s-R9-Dorado-FAST-flye	d__Bacteria;p__Bacillota;c__Bacilli;o__Lactobacillales;f__Enterococcaceae;g__Enterococcus_B;s__Enterococcus_B faecium	GCF_001544255.1	95	d__Bacteria;p__Bacillota;c__Bacilli;o__Lactobacillales;f__Enterococcaceae;g__Enterococcus_B;s__Enterococcus_B faecium	99.18	0.942	GCF_001544255.1	95	d__Bacteria;p__Bacillota;c__Bacilli;o__Lactobacillales;f__Enterococcaceae;g__Enterococcus_B;s__Enterococcus_B faecium	99.18	0.942	d__Bacteria;p__Bacillota;c__Bacilli;o__Lactobacillales;f__Enterococcaceae;g__Enterococcus_B;s__	taxonomic classification defined by topology and ANI	topological placement and ANI have congruent species assignments	GCF_015751045.1, s__Enterococcus_B lactis, 95.0, 94.24, 0.82; GCF_001544215.1, s__Enterococcus_B durans, 95.0, 81.73, 0.423; GCF_011038845.1, s__Enterococcus_B sp011038845, 95.0, 81.52, 0.532; GCF_000271405.2, s__Enterococcus_B hirae, 95.0, 80.41, 0.406; GCA_015680865.1, s__Enterococcus_B lacertideformus, 95.0, 80.26, 0.404; GCF_013394305.1, s__Enterococcus_B pernyi, 96.3614, 80.15, 0.322; GCF_00…	70.31	11	N/A	Genome has more than 10.0% of markers with multiple hits
609596-20-s-R9-Dorado-FAST-new	d__Bacteria;p__Bacillota;c__Bacilli;o__Lactobacillales;f__Enterococcaceae;g__Enterococcus_B;s__Enterococcus_B faecium	GCF_001544255.1	95	d__Bacteria;p__Bacillota;c__Bacilli;o__Lactobacillales;f__Enterococcaceae;g__Enterococcus_B;s__Enterococcus_B faecium	99.29	0.946	GCF_001544255.1	95	d__Bacteria;p__Bacillota;c__Bacilli;o__Lactobacillales;f__Enterococcaceae;g__Enterococcus_B;s__Enterococcus_B faecium	99.29	0.946	d__Bacteria;p__Bacillota;c__Bacilli;o__Lactobacillales;f__Enterococcaceae;g__Enterococcus_B;s__	taxonomic classification defined by topology and ANI	topological placement and ANI have congruent species assignments	GCF_015751045.1, s__Enterococcus_B lactis, 95.0, 94.41, 0.821; GCF_001544215.1, s__Enterococcus_B durans, 95.0, 81.79, 0.416; GCF_011038845.1, s__Enterococcus_B sp011038845, 95.0, 81.61, 0.54; GCF_000271405.2, s__Enterococcus_B hirae, 95.0, 80.57, 0.406; GCA_015680865.1, s__Enterococcus_B lacertideformus, 95.0, 80.39, 0.411; GCF_002140175.1, s__Enterococcus_B sp002140175, 95.0, 79.97, 0.351; GCF_…	96.17	11	N/A	N/A
609596-20-s-R9-Dorado-HAC-flye	d__Bacteria;p__Bacillota;c__Bacilli;o__Lactobacillales;f__Enterococcaceae;g__Enterococcus_B;s__Enterococcus_B faecium	GCF_001544255.1	95	d__Bacteria;p__Bacillota;c__Bacilli;o__Lactobacillales;f__Enterococcaceae;g__Enterococcus_B;s__Enterococcus_B faecium	99.25	0.938	GCF_001544255.1	95	d__Bacteria;p__Bacillota;c__Bacilli;o__Lactobacillales;f__Enterococcaceae;g__Enterococcus_B;s__Enterococcus_B faecium	99.25	0.938	d__Bacteria;p__Bacillota;c__Bacilli;o__Lactobacillales;f__Enterococcaceae;g__Enterococcus_B;s__	taxonomic classification defined by topology and ANI	topological placement and ANI have congruent species assignments	GCF_015751045.1, s__Enterococcus_B lactis, 95.0, 94.38, 0.823; GCF_001544215.1, s__Enterococcus_B durans, 95.0, 82.07, 0.417; GCF_011038845.1, s__Enterococcus_B sp011038845, 95.0, 81.66, 0.545; GCF_000271405.2, s__Enterococcus_B hirae, 95.0, 80.73, 0.394; GCA_015680865.1, s__Enterococcus_B lacertideformus, 95.0, 80.34, 0.413; GCF_013394305.1, s__Enterococcus_B pernyi, 96.3614, 80.19, 0.336; GCF_0…	87.65	11	N/A	N/A
609596-20-s-R9-Dorado-HAC-new	d__Bacteria;p__Bacillota;c__Bacilli;o__Lactobacillales;f__Enterococcaceae;g__Enterococcus_B;s__Enterococcus_B faecium	GCF_001544255.1	95	d__Bacteria;p__Bacillota;c__Bacilli;o__Lactobacillales;f__Enterococcaceae;g__Enterococcus_B;s__Enterococcus_B faecium	99.32	0.944	GCF_001544255.1	95	d__Bacteria;p__Bacillota;c__Bacilli;o__Lactobacillales;f__Enterococcaceae;g__Enterococcus_B;s__Enterococcus_B faecium	99.32	0.944	d__Bacteria;p__Bacillota;c__Bacilli;o__Lactobacillales;f__Enterococcaceae;g__Enterococcus_B;s__	taxonomic classification defined by topology and ANI	topological placement and ANI have congruent species assignments	GCF_015751045.1, s__Enterococcus_B lactis, 95.0, 94.4, 0.822; GCF_001544215.1, s__Enterococcus_B durans, 95.0, 81.76, 0.424; GCF_011038845.1, s__Enterococcus_B sp011038845, 95.0, 81.56, 0.546; GCF_000271405.2, s__Enterococcus_B hirae, 95.0, 80.58, 0.41; GCA_015680865.1, s__Enterococcus_B lacertideformus, 95.0, 80.34, 0.409; GCF_007990225.1, s__Enterococcus_B villorum, 95.0, 80.18, 0.396; GCF_0021…	91.22	11	N/A	N/A
609596-20-s-R9-Dorado-SUP-flye	d__Bacteria;p__Bacillota;c__Bacilli;o__Lactobacillales;f__Enterococcaceae;g__Enterococcus_B;s__Enterococcus_B faecium	GCF_001544255.1	95	d__Bacteria;p__Bacillota;c__Bacilli;o__Lactobacillales;f__Enterococcaceae;g__Enterococcus_B;s__Enterococcus_B faecium	99.22	0.949	GCF_001544255.1	95	d__Bacteria;p__Bacillota;c__Bacilli;o__Lactobacillales;f__Enterococcaceae;g__Enterococcus_B;s__Enterococcus_B faecium	99.22	0.949	d__Bacteria;p__Bacillota;c__Bacilli;o__Lactobacillales;f__Enterococcaceae;g__Enterococcus_B;s__	taxonomic classification defined by topology and ANI	topological placement and ANI have congruent species assignments	GCF_015751045.1, s__Enterococcus_B lactis, 95.0, 94.41, 0.818; GCF_001544215.1, s__Enterococcus_B durans, 95.0, 82.14, 0.419; GCF_011038845.1, s__Enterococcus_B sp011038845, 95.0, 81.65, 0.546; GCF_000271405.2, s__Enterococcus_B hirae, 95.0, 80.44, 0.41; GCA_015680865.1, s__Enterococcus_B lacertideformus, 95.0, 80.31, 0.404; GCF_001886265.1, s__Enterococcus_B thailandicus, 95.0, 80.09, 0.383; GCF…	92.73	11	N/A	N/A
609596-20-s-R9-Dorado-SUP-new	d__Bacteria;p__Bacillota;c__Bacilli;o__Lactobacillales;f__Enterococcaceae;g__Enterococcus_B;s__Enterococcus_B faecium	GCF_001544255.1	95	d__Bacteria;p__Bacillota;c__Bacilli;o__Lactobacillales;f__Enterococcaceae;g__Enterococcus_B;s__Enterococcus_B faecium	99.25	0.948	GCF_001544255.1	95	d__Bacteria;p__Bacillota;c__Bacilli;o__Lactobacillales;f__Enterococcaceae;g__Enterococcus_B;s__Enterococcus_B faecium	99.25	0.948	d__Bacteria;p__Bacillota;c__Bacilli;o__Lactobacillales;f__Enterococcaceae;g__Enterococcus_B;s__	taxonomic classification defined by topology and ANI	topological placement and ANI have congruent species assignments	GCF_015751045.1, s__Enterococcus_B lactis, 95.0, 94.42, 0.824; GCF_001544215.1, s__Enterococcus_B durans, 95.0, 81.79, 0.417; GCF_011038845.1, s__Enterococcus_B sp011038845, 95.0, 81.6, 0.537; GCF_000271405.2, s__Enterococcus_B hirae, 95.0, 80.6, 0.408; GCA_015680865.1, s__Enterococcus_B lacertideformus, 95.0, 80.36, 0.411; GCF_007990225.1, s__Enterococcus_B villorum, 95.0, 80.04, 0.395; GCF_0021…	95.17	11	N/A	N/A
609596-20-s-R9-Guppy-FAST-flye	d__Bacteria;p__Bacillota;c__Bacilli;o__Lactobacillales;f__Enterococcaceae;g__Enterococcus_B;s__Enterococcus_B faecium	GCF_001544255.1	95	d__Bacteria;p__Bacillota;c__Bacilli;o__Lactobacillales;f__Enterococcaceae;g__Enterococcus_B;s__Enterococcus_B faecium	99.15	0.941	GCF_001544255.1	95	d__Bacteria;p__Bacillota;c__Bacilli;o__Lactobacillales;f__Enterococcaceae;g__Enterococcus_B;s__Enterococcus_B faecium	99.15	0.941	d__Bacteria;p__Bacillota;c__Bacilli;o__Lactobacillales;f__Enterococcaceae;g__Enterococcus_B;s__	taxonomic classification defined by topology and ANI	topological placement and ANI have congruent species assignments	GCF_015751045.1, s__Enterococcus_B lactis, 95.0, 94.3, 0.822; GCF_001544215.1, s__Enterococcus_B durans, 95.0, 81.71, 0.413; GCF_011038845.1, s__Enterococcus_B sp011038845, 95.0, 81.42, 0.546; GCF_000271405.2, s__Enterococcus_B hirae, 95.0, 80.41, 0.403; GCA_015680865.1, s__Enterococcus_B lacertideformus, 95.0, 80.28, 0.404; GCF_002813755.1, s__Enterococcus_B mundtii, 96.3614, 80.07, 0.352; GCF_0…	63.71	11	N/A	N/A
609596-20-s-R9-Guppy-FAST-new	d__Bacteria;p__Bacillota;c__Bacilli;o__Lactobacillales;f__Enterococcaceae;g__Enterococcus_B;s__Enterococcus_B faecium	GCF_001544255.1	95	d__Bacteria;p__Bacillota;c__Bacilli;o__Lactobacillales;f__Enterococcaceae;g__Enterococcus_B;s__Enterococcus_B faecium	99.32	0.941	GCF_001544255.1	95	d__Bacteria;p__Bacillota;c__Bacilli;o__Lactobacillales;f__Enterococcaceae;g__Enterococcus_B;s__Enterococcus_B faecium	99.32	0.941	d__Bacteria;p__Bacillota;c__Bacilli;o__Lactobacillales;f__Enterococcaceae;g__Enterococcus_B;s__	taxonomic classification defined by topology and ANI	topological placement and ANI have congruent species assignments	GCF_015751045.1, s__Enterococcus_B lactis, 95.0, 94.41, 0.819; GCF_001544215.1, s__Enterococcus_B durans, 95.0, 81.72, 0.416; GCF_011038845.1, s__Enterococcus_B sp011038845, 95.0, 81.55, 0.551; GCF_000271405.2, s__Enterococcus_B hirae, 95.0, 80.48, 0.408; GCA_015680865.1, s__Enterococcus_B lacertideformus, 95.0, 80.31, 0.418; GCF_013394305.1, s__Enterococcus_B pernyi, 96.3614, 80.2, 0.351; GCF_00…	94.98	11	N/A	N/A
609596-20-s-R9-Guppy-HAC-flye	d__Bacteria;p__Bacillota;c__Bacilli;o__Lactobacillales;f__Enterococcaceae;g__Enterococcus_B;s__Enterococcus_B faecium	GCF_001544255.1	95	d__Bacteria;p__Bacillota;c__Bacilli;o__Lactobacillales;f__Enterococcaceae;g__Enterococcus_B;s__Enterococcus_B faecium	99.26	0.944	GCF_001544255.1	95	d__Bacteria;p__Bacillota;c__Bacilli;o__Lactobacillales;f__Enterococcaceae;g__Enterococcus_B;s__Enterococcus_B faecium	99.26	0.944	d__Bacteria;p__Bacillota;c__Bacilli;o__Lactobacillales;f__Enterococcaceae;g__Enterococcus_B;s__	taxonomic classification defined by topology and ANI	topological placement and ANI have congruent species assignments	GCF_015751045.1, s__Enterococcus_B lactis, 95.0, 94.46, 0.812; GCF_001544215.1, s__Enterococcus_B durans, 95.0, 82.22, 0.419; GCF_011038845.1, s__Enterococcus_B sp011038845, 95.0, 81.62, 0.541; GCF_000271405.2, s__Enterococcus_B hirae, 95.0, 80.54, 0.404; GCA_015680865.1, s__Enterococcus_B lacertideformus, 95.0, 80.35, 0.407; GCF_003957375.1, s__Enterococcus_B mundtii_C, 96.247, 80.17, 0.378; GCF…	89.18	11	N/A	N/A
609596-20-s-R9-Guppy-HAC-new	d__Bacteria;p__Bacillota;c__Bacilli;o__Lactobacillales;f__Enterococcaceae;g__Enterococcus_B;s__Enterococcus_B faecium	GCF_001544255.1	95	d__Bacteria;p__Bacillota;c__Bacilli;o__Lactobacillales;f__Enterococcaceae;g__Enterococcus_B;s__Enterococcus_B faecium	99.26	0.947	GCF_001544255.1	95	d__Bacteria;p__Bacillota;c__Bacilli;o__Lactobacillales;f__Enterococcaceae;g__Enterococcus_B;s__Enterococcus_B faecium	99.26	0.947	d__Bacteria;p__Bacillota;c__Bacilli;o__Lactobacillales;f__Enterococcaceae;g__Enterococcus_B;s__	taxonomic classification defined by topology and ANI	topological placement and ANI have congruent species assignments	GCF_015751045.1, s__Enterococcus_B lactis, 95.0, 94.45, 0.813; GCF_001544215.1, s__Enterococcus_B durans, 95.0, 82.12, 0.426; GCF_011038845.1, s__Enterococcus_B sp011038845, 95.0, 81.67, 0.536; GCF_000271405.2, s__Enterococcus_B hirae, 95.0, 80.71, 0.411; GCA_015680865.1, s__Enterococcus_B lacertideformus, 95.0, 80.37, 0.406; GCF_013394305.1, s__Enterococcus_B pernyi, 96.3614, 80.23, 0.34; GCF_00…	96.46	11	N/A	N/A
609596-20-s-R9-Guppy-SUP-flye	d__Bacteria;p__Bacillota;c__Bacilli;o__Lactobacillales;f__Enterococcaceae;g__Enterococcus_B;s__Enterococcus_B faecium	GCF_001544255.1	95	d__Bacteria;p__Bacillota;c__Bacilli;o__Lactobacillales;f__Enterococcaceae;g__Enterococcus_B;s__Enterococcus_B faecium	99.24	0.946	GCF_001544255.1	95	d__Bacteria;p__Bacillota;c__Bacilli;o__Lactobacillales;f__Enterococcaceae;g__Enterococcus_B;s__Enterococcus_B faecium	99.24	0.946	d__Bacteria;p__Bacillota;c__Bacilli;o__Lactobacillales;f__Enterococcaceae;g__Enterococcus_B;s__	taxonomic classification defined by topology and ANI	topological placement and ANI have congruent species assignments	GCF_015751045.1, s__Enterococcus_B lactis, 95.0, 94.41, 0.825; GCF_001544215.1, s__Enterococcus_B durans, 95.0, 81.93, 0.411; GCF_011038845.1, s__Enterococcus_B sp011038845, 95.0, 81.65, 0.546; GCF_000271405.2, s__Enterococcus_B hirae, 95.0, 80.48, 0.405; GCA_015680865.1, s__Enterococcus_B lacertideformus, 95.0, 80.37, 0.413; GCF_013394305.1, s__Enterococcus_B pernyi, 96.3614, 80.25, 0.333; GCF_0…	95.49	11	N/A	N/A
609596-20-s-R9-Guppy-SUP-new	d__Bacteria;p__Bacillota;c__Bacilli;o__Lactobacillales;f__Enterococcaceae;g__Enterococcus_B;s__Enterococcus_B faecium	GCF_001544255.1	95	d__Bacteria;p__Bacillota;c__Bacilli;o__Lactobacillales;f__Enterococcaceae;g__Enterococcus_B;s__Enterococcus_B faecium	99.29	0.943	GCF_001544255.1	95	d__Bacteria;p__Bacillota;c__Bacilli;o__Lactobacillales;f__Enterococcaceae;g__Enterococcus_B;s__Enterococcus_B faecium	99.29	0.943	d__Bacteria;p__Bacillota;c__Bacilli;o__Lactobacillales;f__Enterococcaceae;g__Enterococcus_B;s__	taxonomic classification defined by topology and ANI	topological placement and ANI have congruent species assignments	GCF_015751045.1, s__Enterococcus_B lactis, 95.0, 94.45, 0.825; GCF_001544215.1, s__Enterococcus_B durans, 95.0, 82.1, 0.419; GCF_011038845.1, s__Enterococcus_B sp011038845, 95.0, 81.68, 0.548; GCF_000271405.2, s__Enterococcus_B hirae, 95.0, 80.56, 0.406; GCA_015680865.1, s__Enterococcus_B lacertideformus, 95.0, 80.31, 0.413; GCF_013394305.1, s__Enterococcus_B pernyi, 96.3614, 80.26, 0.335; GCF_00…	96.46	11	N/A	N/A
609596-20-s-illumina-new	d__Bacteria;p__Bacillota;c__Bacilli;o__Lactobacillales;f__Enterococcaceae;g__Enterococcus_B;s__Enterococcus_B faecium	GCF_001544255.1	95	d__Bacteria;p__Bacillota;c__Bacilli;o__Lactobacillales;f__Enterococcaceae;g__Enterococcus_B;s__Enterococcus_B faecium	99.4	0.906	GCF_001544255.1	95	d__Bacteria;p__Bacillota;c__Bacilli;o__Lactobacillales;f__Enterococcaceae;g__Enterococcus_B;s__Enterococcus_B faecium	99.4	0.906	d__Bacteria;p__Bacillota;c__Bacilli;o__Lactobacillales;f__Enterococcaceae;g__Enterococcus_B;s__	taxonomic classification defined by topology and ANI	topological placement and ANI have congruent species assignments	GCF_015751045.1, s__Enterococcus_B lactis, 95.0, 94.63, 0.785; GCF_001544215.1, s__Enterococcus_B durans, 95.0, 81.93, 0.456; GCF_011038845.1, s__Enterococcus_B sp011038845, 95.0, 81.63, 0.554; GCF_000271405.2, s__Enterococcus_B hirae, 95.0, 80.23, 0.414; GCA_015680865.1, s__Enterococcus_B lacertideformus, 95.0, 80.19, 0.401; GCF_007990225.1, s__Enterococcus_B villorum, 95.0, 80.01, 0.375; GCF_00…	96.46	11	N/A	N/A
609596-20-s-lrp-R10-Dorado-FAST-new	d__Bacteria;p__Bacillota;c__Bacilli;o__Lactobacillales;f__Enterococcaceae;g__Enterococcus_B;s__Enterococcus_B faecium	GCF_001544255.1	95	d__Bacteria;p__Bacillota;c__Bacilli;o__Lactobacillales;f__Enterococcaceae;g__Enterococcus_B;s__Enterococcus_B faecium	99.24	0.952	GCF_001544255.1	95	d__Bacteria;p__Bacillota;c__Bacilli;o__Lactobacillales;f__Enterococcaceae;g__Enterococcus_B;s__Enterococcus_B faecium	99.24	0.952	d__Bacteria;p__Bacillota;c__Bacilli;o__Lactobacillales;f__Enterococcaceae;g__Enterococcus_B;s__	taxonomic classification defined by topology and ANI	topological placement and ANI have congruent species assignments	GCF_015751045.1, s__Enterococcus_B lactis, 95.0, 94.46, 0.825; GCF_001544215.1, s__Enterococcus_B durans, 95.0, 82.24, 0.42; GCF_011038845.1, s__Enterococcus_B sp011038845, 95.0, 81.75, 0.561; GCF_000271405.2, s__Enterococcus_B hirae, 95.0, 80.59, 0.414; GCA_015680865.1, s__Enterococcus_B lacertideformus, 95.0, 80.39, 0.416; GCF_003957375.1, s__Enterococcus_B mundtii_C, 96.247, 80.23, 0.375; GCF_…	96.46	11	N/A	N/A
609596-20-s-lrp-R10-Dorado-HAC-new	d__Bacteria;p__Bacillota;c__Bacilli;o__Lactobacillales;f__Enterococcaceae;g__Enterococcus_B;s__Enterococcus_B faecium	GCF_001544255.1	95	d__Bacteria;p__Bacillota;c__Bacilli;o__Lactobacillales;f__Enterococcaceae;g__Enterococcus_B;s__Enterococcus_B faecium	99.24	0.951	GCF_001544255.1	95	d__Bacteria;p__Bacillota;c__Bacilli;o__Lactobacillales;f__Enterococcaceae;g__Enterococcus_B;s__Enterococcus_B faecium	99.24	0.951	d__Bacteria;p__Bacillota;c__Bacilli;o__Lactobacillales;f__Enterococcaceae;g__Enterococcus_B;s__	taxonomic classification defined by topology and ANI	topological placement and ANI have congruent species assignments	GCF_015751045.1, s__Enterococcus_B lactis, 95.0, 94.46, 0.826; GCF_001544215.1, s__Enterococcus_B durans, 95.0, 82.16, 0.422; GCF_011038845.1, s__Enterococcus_B sp011038845, 95.0, 81.61, 0.563; GCF_000271405.2, s__Enterococcus_B hirae, 95.0, 80.54, 0.412; GCA_015680865.1, s__Enterococcus_B lacertideformus, 95.0, 80.34, 0.408; GCF_003957375.1, s__Enterococcus_B mundtii_C, 96.247, 80.18, 0.368; GCF…	96.46	11	N/A	N/A
609596-20-s-lrp-R10-Dorado-SUP-new	d__Bacteria;p__Bacillota;c__Bacilli;o__Lactobacillales;f__Enterococcaceae;g__Enterococcus_B;s__Enterococcus_B faecium	GCF_001544255.1	95	d__Bacteria;p__Bacillota;c__Bacilli;o__Lactobacillales;f__Enterococcaceae;g__Enterococcus_B;s__Enterococcus_B faecium	99.25	0.952	GCF_001544255.1	95	d__Bacteria;p__Bacillota;c__Bacilli;o__Lactobacillales;f__Enterococcaceae;g__Enterococcus_B;s__Enterococcus_B faecium	99.25	0.952	d__Bacteria;p__Bacillota;c__Bacilli;o__Lactobacillales;f__Enterococcaceae;g__Enterococcus_B;s__	taxonomic classification defined by topology and ANI	topological placement and ANI have congruent species assignments	GCF_015751045.1, s__Enterococcus_B lactis, 95.0, 94.46, 0.823; GCF_001544215.1, s__Enterococcus_B durans, 95.0, 82.21, 0.419; GCF_011038845.1, s__Enterococcus_B sp011038845, 95.0, 81.69, 0.564; GCF_000271405.2, s__Enterococcus_B hirae, 95.0, 80.47, 0.411; GCA_015680865.1, s__Enterococcus_B lacertideformus, 95.0, 80.37, 0.409; GCF_003957375.1, s__Enterococcus_B mundtii_C, 96.247, 80.2, 0.369; GCF_…	96.46	11	N/A	N/A
609596-20-s-lrp-R10-Guppy-FAST-new	d__Bacteria;p__Bacillota;c__Bacilli;o__Lactobacillales;f__Enterococcaceae;g__Enterococcus_B;s__Enterococcus_B faecium	GCF_001544255.1	95	d__Bacteria;p__Bacillota;c__Bacilli;o__Lactobacillales;f__Enterococcaceae;g__Enterococcus_B;s__Enterococcus_B faecium	99.24	0.952	GCF_001544255.1	95	d__Bacteria;p__Bacillota;c__Bacilli;o__Lactobacillales;f__Enterococcaceae;g__Enterococcus_B;s__Enterococcus_B faecium	99.24	0.952	d__Bacteria;p__Bacillota;c__Bacilli;o__Lactobacillales;f__Enterococcaceae;g__Enterococcus_B;s__	taxonomic classification defined by topology and ANI	topological placement and ANI have congruent species assignments	GCF_015751045.1, s__Enterococcus_B lactis, 95.0, 94.46, 0.827; GCF_001544215.1, s__Enterococcus_B durans, 95.0, 82.26, 0.419; GCF_011038845.1, s__Enterococcus_B sp011038845, 95.0, 81.68, 0.559; GCF_000271405.2, s__Enterococcus_B hirae, 95.0, 80.53, 0.409; GCA_015680865.1, s__Enterococcus_B lacertideformus, 95.0, 80.39, 0.411; GCF_003957375.1, s__Enterococcus_B mundtii_C, 96.247, 80.19, 0.371; GCF…	96.46	11	N/A	N/A
609596-20-s-lrp-R10-Guppy-HAC-new	d__Bacteria;p__Bacillota;c__Bacilli;o__Lactobacillales;f__Enterococcaceae;g__Enterococcus_B;s__Enterococcus_B faecium	GCF_001544255.1	95	d__Bacteria;p__Bacillota;c__Bacilli;o__Lactobacillales;f__Enterococcaceae;g__Enterococcus_B;s__Enterococcus_B faecium	99.24	0.951	GCF_001544255.1	95	d__Bacteria;p__Bacillota;c__Bacilli;o__Lactobacillales;f__Enterococcaceae;g__Enterococcus_B;s__Enterococcus_B faecium	99.24	0.951	d__Bacteria;p__Bacillota;c__Bacilli;o__Lactobacillales;f__Enterococcaceae;g__Enterococcus_B;s__	taxonomic classification defined by topology and ANI	topological placement and ANI have congruent species assignments	GCF_015751045.1, s__Enterococcus_B lactis, 95.0, 94.44, 0.825; GCF_001544215.1, s__Enterococcus_B durans, 95.0, 82.18, 0.423; GCF_011038845.1, s__Enterococcus_B sp011038845, 95.0, 81.62, 0.563; GCF_000271405.2, s__Enterococcus_B hirae, 95.0, 80.66, 0.411; GCA_015680865.1, s__Enterococcus_B lacertideformus, 95.0, 80.33, 0.408; GCF_003957375.1, s__Enterococcus_B mundtii_C, 96.247, 80.26, 0.368; GCF…	96.46	11	N/A	N/A
609596-20-s-lrp-R10-Guppy-SUP-new	d__Bacteria;p__Bacillota;c__Bacilli;o__Lactobacillales;f__Enterococcaceae;g__Enterococcus_B;s__Enterococcus_B faecium	GCF_001544255.1	95	d__Bacteria;p__Bacillota;c__Bacilli;o__Lactobacillales;f__Enterococcaceae;g__Enterococcus_B;s__Enterococcus_B faecium	99.26	0.949	GCF_001544255.1	95	d__Bacteria;p__Bacillota;c__Bacilli;o__Lactobacillales;f__Enterococcaceae;g__Enterococcus_B;s__Enterococcus_B faecium	99.26	0.949	d__Bacteria;p__Bacillota;c__Bacilli;o__Lactobacillales;f__Enterococcaceae;g__Enterococcus_B;s__	taxonomic classification defined by topology and ANI	topological placement and ANI have congruent species assignments	GCF_015751045.1, s__Enterococcus_B lactis, 95.0, 94.45, 0.827; GCF_001544215.1, s__Enterococcus_B durans, 95.0, 82.19, 0.423; GCF_011038845.1, s__Enterococcus_B sp011038845, 95.0, 81.58, 0.56; GCF_000271405.2, s__Enterococcus_B hirae, 95.0, 80.57, 0.411; GCA_015680865.1, s__Enterococcus_B lacertideformus, 95.0, 80.36, 0.406; GCF_003957375.1, s__Enterococcus_B mundtii_C, 96.247, 80.16, 0.368; GCF_…	96.46	11	N/A	N/A
609596-20-s-lrp-R10-Rerio-SUP-new	d__Bacteria;p__Bacillota;c__Bacilli;o__Lactobacillales;f__Enterococcaceae;g__Enterococcus_B;s__Enterococcus_B faecium	GCF_001544255.1	95	d__Bacteria;p__Bacillota;c__Bacilli;o__Lactobacillales;f__Enterococcaceae;g__Enterococcus_B;s__Enterococcus_B faecium	99.24	0.952	GCF_001544255.1	95	d__Bacteria;p__Bacillota;c__Bacilli;o__Lactobacillales;f__Enterococcaceae;g__Enterococcus_B;s__Enterococcus_B faecium	99.24	0.952	d__Bacteria;p__Bacillota;c__Bacilli;o__Lactobacillales;f__Enterococcaceae;g__Enterococcus_B;s__	taxonomic classification defined by topology and ANI	topological placement and ANI have congruent species assignments	GCF_015751045.1, s__Enterococcus_B lactis, 95.0, 94.46, 0.824; GCF_001544215.1, s__Enterococcus_B durans, 95.0, 82.21, 0.419; GCF_011038845.1, s__Enterococcus_B sp011038845, 95.0, 81.66, 0.563; GCF_000271405.2, s__Enterococcus_B hirae, 95.0, 80.53, 0.411; GCA_015680865.1, s__Enterococcus_B lacertideformus, 95.0, 80.39, 0.408; GCF_003957375.1, s__Enterococcus_B mundtii_C, 96.247, 80.16, 0.368; GCF…	96.46	11	N/A	N/A
609596-20-s-lrp-R9-Dorado-FAST-new	d__Bacteria;p__Bacillota;c__Bacilli;o__Lactobacillales;f__Enterococcaceae;g__Enterococcus_B;s__Enterococcus_B faecium	GCF_001544255.1	95	d__Bacteria;p__Bacillota;c__Bacilli;o__Lactobacillales;f__Enterococcaceae;g__Enterococcus_B;s__Enterococcus_B faecium	99.26	0.949	GCF_001544255.1	95	d__Bacteria;p__Bacillota;c__Bacilli;o__Lactobacillales;f__Enterococcaceae;g__Enterococcus_B;s__Enterococcus_B faecium	99.26	0.949	d__Bacteria;p__Bacillota;c__Bacilli;o__Lactobacillales;f__Enterococcaceae;g__Enterococcus_B;s__	taxonomic classification defined by topology and ANI	topological placement and ANI have congruent species assignments	GCF_015751045.1, s__Enterococcus_B lactis, 95.0, 94.46, 0.828; GCF_001544215.1, s__Enterococcus_B durans, 95.0, 82.29, 0.417; GCF_011038845.1, s__Enterococcus_B sp011038845, 95.0, 81.61, 0.561; GCF_000271405.2, s__Enterococcus_B hirae, 95.0, 80.63, 0.415; GCA_015680865.1, s__Enterococcus_B lacertideformus, 95.0, 80.42, 0.413; GCF_013394305.1, s__Enterococcus_B pernyi, 96.3614, 80.16, 0.334; GCF_0…	96.46	11	N/A	N/A
609596-20-s-lrp-R9-Dorado-HAC-new	d__Bacteria;p__Bacillota;c__Bacilli;o__Lactobacillales;f__Enterococcaceae;g__Enterococcus_B;s__Enterococcus_B faecium	GCF_001544255.1	95	d__Bacteria;p__Bacillota;c__Bacilli;o__Lactobacillales;f__Enterococcaceae;g__Enterococcus_B;s__Enterococcus_B faecium	99.26	0.949	GCF_001544255.1	95	d__Bacteria;p__Bacillota;c__Bacilli;o__Lactobacillales;f__Enterococcaceae;g__Enterococcus_B;s__Enterococcus_B faecium	99.26	0.949	d__Bacteria;p__Bacillota;c__Bacilli;o__Lactobacillales;f__Enterococcaceae;g__Enterococcus_B;s__	taxonomic classification defined by topology and ANI	topological placement and ANI have congruent species assignments	GCF_015751045.1, s__Enterococcus_B lactis, 95.0, 94.46, 0.828; GCF_001544215.1, s__Enterococcus_B durans, 95.0, 82.29, 0.417; GCF_011038845.1, s__Enterococcus_B sp011038845, 95.0, 81.61, 0.561; GCF_000271405.2, s__Enterococcus_B hirae, 95.0, 80.63, 0.415; GCA_015680865.1, s__Enterococcus_B lacertideformus, 95.0, 80.42, 0.413; GCF_013394305.1, s__Enterococcus_B pernyi, 96.3614, 80.16, 0.334; GCF_0…	96.46	11	N/A	N/A
609596-20-s-lrp-R9-Dorado-SUP-new	d__Bacteria;p__Bacillota;c__Bacilli;o__Lactobacillales;f__Enterococcaceae;g__Enterococcus_B;s__Enterococcus_B faecium	GCF_001544255.1	95	d__Bacteria;p__Bacillota;c__Bacilli;o__Lactobacillales;f__Enterococcaceae;g__Enterococcus_B;s__Enterococcus_B faecium	99.25	0.951	GCF_001544255.1	95	d__Bacteria;p__Bacillota;c__Bacilli;o__Lactobacillales;f__Enterococcaceae;g__Enterococcus_B;s__Enterococcus_B faecium	99.25	0.951	d__Bacteria;p__Bacillota;c__Bacilli;o__Lactobacillales;f__Enterococcaceae;g__Enterococcus_B;s__	taxonomic classification defined by topology and ANI	topological placement and ANI have congruent species assignments	GCF_015751045.1, s__Enterococcus_B lactis, 95.0, 94.43, 0.83; GCF_001544215.1, s__Enterococcus_B durans, 95.0, 82.16, 0.425; GCF_011038845.1, s__Enterococcus_B sp011038845, 95.0, 81.63, 0.563; GCF_000271405.2, s__Enterococcus_B hirae, 95.0, 80.7, 0.414; GCA_015680865.1, s__Enterococcus_B lacertideformus, 95.0, 80.41, 0.416; GCF_003957375.1, s__Enterococcus_B mundtii_C, 96.247, 80.14, 0.374; GCF_0…	96.46	11	N/A	N/A
609596-20-s-lrp-R9-Guppy-FAST-new	d__Bacteria;p__Bacillota;c__Bacilli;o__Lactobacillales;f__Enterococcaceae;g__Enterococcus_B;s__Enterococcus_B faecium	GCF_001544255.1	95	d__Bacteria;p__Bacillota;c__Bacilli;o__Lactobacillales;f__Enterococcaceae;g__Enterococcus_B;s__Enterococcus_B faecium	99.26	0.949	GCF_001544255.1	95	d__Bacteria;p__Bacillota;c__Bacilli;o__Lactobacillales;f__Enterococcaceae;g__Enterococcus_B;s__Enterococcus_B faecium	99.26	0.949	d__Bacteria;p__Bacillota;c__Bacilli;o__Lactobacillales;f__Enterococcaceae;g__Enterococcus_B;s__	taxonomic classification defined by topology and ANI	topological placement and ANI have congruent species assignments	GCF_015751045.1, s__Enterococcus_B lactis, 95.0, 94.44, 0.83; GCF_001544215.1, s__Enterococcus_B durans, 95.0, 82.12, 0.422; GCF_011038845.1, s__Enterococcus_B sp011038845, 95.0, 81.54, 0.568; GCF_000271405.2, s__Enterococcus_B hirae, 95.0, 80.69, 0.412; GCA_015680865.1, s__Enterococcus_B lacertideformus, 95.0, 80.4, 0.412; GCF_003957375.1, s__Enterococcus_B mundtii_C, 96.247, 80.19, 0.371; GCF_0…	96.46	11	N/A	N/A
609596-20-s-lrp-R9-Guppy-HAC-new	d__Bacteria;p__Bacillota;c__Bacilli;o__Lactobacillales;f__Enterococcaceae;g__Enterococcus_B;s__Enterococcus_B faecium	GCF_001544255.1	95	d__Bacteria;p__Bacillota;c__Bacilli;o__Lactobacillales;f__Enterococcaceae;g__Enterococcus_B;s__Enterococcus_B faecium	99.24	0.951	GCF_001544255.1	95	d__Bacteria;p__Bacillota;c__Bacilli;o__Lactobacillales;f__Enterococcaceae;g__Enterococcus_B;s__Enterococcus_B faecium	99.24	0.951	d__Bacteria;p__Bacillota;c__Bacilli;o__Lactobacillales;f__Enterococcaceae;g__Enterococcus_B;s__	taxonomic classification defined by topology and ANI	topological placement and ANI have congruent species assignments	GCF_015751045.1, s__Enterococcus_B lactis, 95.0, 94.49, 0.821; GCF_001544215.1, s__Enterococcus_B durans, 95.0, 82.22, 0.422; GCF_011038845.1, s__Enterococcus_B sp011038845, 95.0, 81.63, 0.563; GCF_000271405.2, s__Enterococcus_B hirae, 95.0, 80.58, 0.414; GCA_015680865.1, s__Enterococcus_B lacertideformus, 95.0, 80.32, 0.409; GCF_003957375.1, s__Enterococcus_B mundtii_C, 96.247, 80.23, 0.367; GCF…	96.46	11	N/A	N/A
609596-20-s-lrp-R9-Guppy-SUP-new	d__Bacteria;p__Bacillota;c__Bacilli;o__Lactobacillales;f__Enterococcaceae;g__Enterococcus_B;s__Enterococcus_B faecium	GCF_001544255.1	95	d__Bacteria;p__Bacillota;c__Bacilli;o__Lactobacillales;f__Enterococcaceae;g__Enterococcus_B;s__Enterococcus_B faecium	99.29	0.951	GCF_001544255.1	95	d__Bacteria;p__Bacillota;c__Bacilli;o__Lactobacillales;f__Enterococcaceae;g__Enterococcus_B;s__Enterococcus_B faecium	99.29	0.951	d__Bacteria;p__Bacillota;c__Bacilli;o__Lactobacillales;f__Enterococcaceae;g__Enterococcus_B;s__	taxonomic classification defined by topology and ANI	topological placement and ANI have congruent species assignments	GCF_015751045.1, s__Enterococcus_B lactis, 95.0, 94.44, 0.832; GCF_001544215.1, s__Enterococcus_B durans, 95.0, 82.25, 0.426; GCF_011038845.1, s__Enterococcus_B sp011038845, 95.0, 81.68, 0.556; GCF_000271405.2, s__Enterococcus_B hirae, 95.0, 80.79, 0.416; GCA_015680865.1, s__Enterococcus_B lacertideformus, 95.0, 80.34, 0.422; GCF_003957375.1, s__Enterococcus_B mundtii_C, 96.247, 80.2, 0.378; GCF_…	96.46	11	N/A	N/A
609596-20-s-srp-R10-Dorado-FAST-new	d__Bacteria;p__Bacillota;c__Bacilli;o__Lactobacillales;f__Enterococcaceae;g__Enterococcus_B;s__Enterococcus_B faecium	GCF_001544255.1	95	d__Bacteria;p__Bacillota;c__Bacilli;o__Lactobacillales;f__Enterococcaceae;g__Enterococcus_B;s__Enterococcus_B faecium	99.29	0.947	GCF_001544255.1	95	d__Bacteria;p__Bacillota;c__Bacilli;o__Lactobacillales;f__Enterococcaceae;g__Enterococcus_B;s__Enterococcus_B faecium	99.29	0.947	d__Bacteria;p__Bacillota;c__Bacilli;o__Lactobacillales;f__Enterococcaceae;g__Enterococcus_B;s__	taxonomic classification defined by topology and ANI	topological placement and ANI have congruent species assignments	GCF_015751045.1, s__Enterococcus_B lactis, 95.0, 94.43, 0.831; GCF_001544215.1, s__Enterococcus_B durans, 95.0, 82.36, 0.423; GCF_011038845.1, s__Enterococcus_B sp011038845, 95.0, 81.69, 0.555; GCF_000271405.2, s__Enterococcus_B hirae, 95.0, 80.72, 0.413; GCA_015680865.1, s__Enterococcus_B lacertideformus, 95.0, 80.38, 0.419; GCF_013394305.1, s__Enterococcus_B pernyi, 96.3614, 80.37, 0.327; GCF_0…	96.46	11	N/A	N/A
609596-20-s-srp-R10-Dorado-HAC-new	d__Bacteria;p__Bacillota;c__Bacilli;o__Lactobacillales;f__Enterococcaceae;g__Enterococcus_B;s__Enterococcus_B faecium	GCF_001544255.1	95	d__Bacteria;p__Bacillota;c__Bacilli;o__Lactobacillales;f__Enterococcaceae;g__Enterococcus_B;s__Enterococcus_B faecium	99.25	0.949	GCF_001544255.1	95	d__Bacteria;p__Bacillota;c__Bacilli;o__Lactobacillales;f__Enterococcaceae;g__Enterococcus_B;s__Enterococcus_B faecium	99.25	0.949	d__Bacteria;p__Bacillota;c__Bacilli;o__Lactobacillales;f__Enterococcaceae;g__Enterococcus_B;s__	taxonomic classification defined by topology and ANI	topological placement and ANI have congruent species assignments	GCF_015751045.1, s__Enterococcus_B lactis, 95.0, 94.42, 0.826; GCF_001544215.1, s__Enterococcus_B durans, 95.0, 82.19, 0.431; GCF_011038845.1, s__Enterococcus_B sp011038845, 95.0, 81.66, 0.546; GCF_000271405.2, s__Enterococcus_B hirae, 95.0, 80.68, 0.411; GCA_015680865.1, s__Enterococcus_B lacertideformus, 95.0, 80.33, 0.409; GCF_003957375.1, s__Enterococcus_B mundtii_C, 96.247, 80.25, 0.368; GCF…	96.46	11	N/A	N/A
609596-20-s-srp-R10-Dorado-SUP-new	d__Bacteria;p__Bacillota;c__Bacilli;o__Lactobacillales;f__Enterococcaceae;g__Enterococcus_B;s__Enterococcus_B faecium	GCF_001544255.1	95	d__Bacteria;p__Bacillota;c__Bacilli;o__Lactobacillales;f__Enterococcaceae;g__Enterococcus_B;s__Enterococcus_B faecium	99.25	0.949	GCF_001544255.1	95	d__Bacteria;p__Bacillota;c__Bacilli;o__Lactobacillales;f__Enterococcaceae;g__Enterococcus_B;s__Enterococcus_B faecium	99.25	0.949	d__Bacteria;p__Bacillota;c__Bacilli;o__Lactobacillales;f__Enterococcaceae;g__Enterococcus_B;s__	taxonomic classification defined by topology and ANI	topological placement and ANI have congruent species assignments	GCF_015751045.1, s__Enterococcus_B lactis, 95.0, 94.44, 0.825; GCF_001544215.1, s__Enterococcus_B durans, 95.0, 82.23, 0.43; GCF_011038845.1, s__Enterococcus_B sp011038845, 95.0, 81.63, 0.549; GCF_000271405.2, s__Enterococcus_B hirae, 95.0, 80.71, 0.409; GCA_015680865.1, s__Enterococcus_B lacertideformus, 95.0, 80.33, 0.409; GCF_003957375.1, s__Enterococcus_B mundtii_C, 96.247, 80.25, 0.368; GCF_…	96.46	11	N/A	N/A
609596-20-s-srp-R10-Guppy-FAST-new	d__Bacteria;p__Bacillota;c__Bacilli;o__Lactobacillales;f__Enterococcaceae;g__Enterococcus_B;s__Enterococcus_B faecium	GCF_001544255.1	95	d__Bacteria;p__Bacillota;c__Bacilli;o__Lactobacillales;f__Enterococcaceae;g__Enterococcus_B;s__Enterococcus_B faecium	99.26	0.952	GCF_001544255.1	95	d__Bacteria;p__Bacillota;c__Bacilli;o__Lactobacillales;f__Enterococcaceae;g__Enterococcus_B;s__Enterococcus_B faecium	99.26	0.952	d__Bacteria;p__Bacillota;c__Bacilli;o__Lactobacillales;f__Enterococcaceae;g__Enterococcus_B;s__	taxonomic classification defined by topology and ANI	topological placement and ANI have congruent species assignments	GCF_015751045.1, s__Enterococcus_B lactis, 95.0, 94.42, 0.837; GCF_001544215.1, s__Enterococcus_B durans, 95.0, 82.24, 0.433; GCF_011038845.1, s__Enterococcus_B sp011038845, 95.0, 81.72, 0.555; GCF_000271405.2, s__Enterococcus_B hirae, 95.0, 80.55, 0.419; GCA_015680865.1, s__Enterococcus_B lacertideformus, 95.0, 80.36, 0.418; GCF_007990225.1, s__Enterococcus_B villorum, 95.0, 80.28, 0.391; GCF_00…	96.46	11	N/A	N/A
609596-20-s-srp-R10-Guppy-HAC-new	d__Bacteria;p__Bacillota;c__Bacilli;o__Lactobacillales;f__Enterococcaceae;g__Enterococcus_B;s__Enterococcus_B faecium	GCF_001544255.1	95	d__Bacteria;p__Bacillota;c__Bacilli;o__Lactobacillales;f__Enterococcaceae;g__Enterococcus_B;s__Enterococcus_B faecium	99.22	0.958	GCF_001544255.1	95	d__Bacteria;p__Bacillota;c__Bacilli;o__Lactobacillales;f__Enterococcaceae;g__Enterococcus_B;s__Enterococcus_B faecium	99.22	0.958	d__Bacteria;p__Bacillota;c__Bacilli;o__Lactobacillales;f__Enterococcaceae;g__Enterococcus_B;s__	taxonomic classification defined by topology and ANI	topological placement and ANI have congruent species assignments	GCF_015751045.1, s__Enterococcus_B lactis, 95.0, 94.43, 0.825; GCF_001544215.1, s__Enterococcus_B durans, 95.0, 82.24, 0.428; GCF_011038845.1, s__Enterococcus_B sp011038845, 95.0, 81.69, 0.539; GCF_000271405.2, s__Enterococcus_B hirae, 95.0, 80.69, 0.416; GCA_015680865.1, s__Enterococcus_B lacertideformus, 95.0, 80.37, 0.413; GCF_013394305.1, s__Enterococcus_B pernyi, 96.3614, 80.23, 0.329; GCF_0…	96.46	11	N/A	N/A
609596-20-s-srp-R10-Guppy-SUP-new	d__Bacteria;p__Bacillota;c__Bacilli;o__Lactobacillales;f__Enterococcaceae;g__Enterococcus_B;s__Enterococcus_B faecium	GCF_001544255.1	95	d__Bacteria;p__Bacillota;c__Bacilli;o__Lactobacillales;f__Enterococcaceae;g__Enterococcus_B;s__Enterococcus_B faecium	99.27	0.948	GCF_001544255.1	95	d__Bacteria;p__Bacillota;c__Bacilli;o__Lactobacillales;f__Enterococcaceae;g__Enterococcus_B;s__Enterococcus_B faecium	99.27	0.948	d__Bacteria;p__Bacillota;c__Bacilli;o__Lactobacillales;f__Enterococcaceae;g__Enterococcus_B;s__	taxonomic classification defined by topology and ANI	topological placement and ANI have congruent species assignments	GCF_015751045.1, s__Enterococcus_B lactis, 95.0, 94.43, 0.831; GCF_001544215.1, s__Enterococcus_B durans, 95.0, 82.41, 0.425; GCF_011038845.1, s__Enterococcus_B sp011038845, 95.0, 81.66, 0.554; GCF_000271405.2, s__Enterococcus_B hirae, 95.0, 80.72, 0.413; GCA_015680865.1, s__Enterococcus_B lacertideformus, 95.0, 80.39, 0.418; GCF_013394305.1, s__Enterococcus_B pernyi, 96.3614, 80.28, 0.334; GCF_0…	96.46	11	N/A	N/A
609596-20-s-srp-R10-Rerio-SUP-new	d__Bacteria;p__Bacillota;c__Bacilli;o__Lactobacillales;f__Enterococcaceae;g__Enterococcus_B;s__Enterococcus_B faecium	GCF_001544255.1	95	d__Bacteria;p__Bacillota;c__Bacilli;o__Lactobacillales;f__Enterococcaceae;g__Enterococcus_B;s__Enterococcus_B faecium	99.26	0.951	GCF_001544255.1	95	d__Bacteria;p__Bacillota;c__Bacilli;o__Lactobacillales;f__Enterococcaceae;g__Enterococcus_B;s__Enterococcus_B faecium	99.26	0.951	d__Bacteria;p__Bacillota;c__Bacilli;o__Lactobacillales;f__Enterococcaceae;g__Enterococcus_B;s__	taxonomic classification defined by topology and ANI	topological placement and ANI have congruent species assignments	GCF_015751045.1, s__Enterococcus_B lactis, 95.0, 94.46, 0.826; GCF_001544215.1, s__Enterococcus_B durans, 95.0, 82.34, 0.423; GCF_011038845.1, s__Enterococcus_B sp011038845, 95.0, 81.66, 0.548; GCF_000271405.2, s__Enterococcus_B hirae, 95.0, 80.56, 0.408; GCA_015680865.1, s__Enterococcus_B lacertideformus, 95.0, 80.33, 0.416; GCF_003957375.1, s__Enterococcus_B mundtii_C, 96.247, 80.19, 0.374; GCF…	96.46	11	N/A	N/A
609596-20-s-srp-R9-Dorado-FAST-new	d__Bacteria;p__Bacillota;c__Bacilli;o__Lactobacillales;f__Enterococcaceae;g__Enterococcus_B;s__Enterococcus_B faecium	GCF_001544255.1	95	d__Bacteria;p__Bacillota;c__Bacilli;o__Lactobacillales;f__Enterococcaceae;g__Enterococcus_B;s__Enterococcus_B faecium	99.3	0.946	GCF_001544255.1	95	d__Bacteria;p__Bacillota;c__Bacilli;o__Lactobacillales;f__Enterococcaceae;g__Enterococcus_B;s__Enterococcus_B faecium	99.3	0.946	d__Bacteria;p__Bacillota;c__Bacilli;o__Lactobacillales;f__Enterococcaceae;g__Enterococcus_B;s__	taxonomic classification defined by topology and ANI	topological placement and ANI have congruent species assignments	GCF_015751045.1, s__Enterococcus_B lactis, 95.0, 94.41, 0.821; GCF_001544215.1, s__Enterococcus_B durans, 95.0, 81.79, 0.416; GCF_011038845.1, s__Enterococcus_B sp011038845, 95.0, 81.62, 0.539; GCF_000271405.2, s__Enterococcus_B hirae, 95.0, 80.68, 0.405; GCA_015680865.1, s__Enterococcus_B lacertideformus, 95.0, 80.39, 0.411; GCF_002140175.1, s__Enterococcus_B sp002140175, 95.0, 80.05, 0.346; GCF…	96.46	11	N/A	N/A
609596-20-s-srp-R9-Dorado-HAC-new	d__Bacteria;p__Bacillota;c__Bacilli;o__Lactobacillales;f__Enterococcaceae;g__Enterococcus_B;s__Enterococcus_B faecium	GCF_001544255.1	95	d__Bacteria;p__Bacillota;c__Bacilli;o__Lactobacillales;f__Enterococcaceae;g__Enterococcus_B;s__Enterococcus_B faecium	99.34	0.943	GCF_001544255.1	95	d__Bacteria;p__Bacillota;c__Bacilli;o__Lactobacillales;f__Enterococcaceae;g__Enterococcus_B;s__Enterococcus_B faecium	99.34	0.943	d__Bacteria;p__Bacillota;c__Bacilli;o__Lactobacillales;f__Enterococcaceae;g__Enterococcus_B;s__	taxonomic classification defined by topology and ANI	topological placement and ANI have congruent species assignments	GCF_015751045.1, s__Enterococcus_B lactis, 95.0, 94.37, 0.823; GCF_001544215.1, s__Enterococcus_B durans, 95.0, 81.74, 0.426; GCF_011038845.1, s__Enterococcus_B sp011038845, 95.0, 81.58, 0.545; GCF_000271405.2, s__Enterococcus_B hirae, 95.0, 80.67, 0.41; GCA_015680865.1, s__Enterococcus_B lacertideformus, 95.0, 80.38, 0.411; GCF_007990225.1, s__Enterococcus_B villorum, 95.0, 80.13, 0.397; GCF_002…	96.46	11	N/A	N/A
609596-20-s-srp-R9-Dorado-SUP-new	d__Bacteria;p__Bacillota;c__Bacilli;o__Lactobacillales;f__Enterococcaceae;g__Enterococcus_B;s__Enterococcus_B faecium	GCF_001544255.1	95	d__Bacteria;p__Bacillota;c__Bacilli;o__Lactobacillales;f__Enterococcaceae;g__Enterococcus_B;s__Enterococcus_B faecium	99.27	0.947	GCF_001544255.1	95	d__Bacteria;p__Bacillota;c__Bacilli;o__Lactobacillales;f__Enterococcaceae;g__Enterococcus_B;s__Enterococcus_B faecium	99.27	0.947	d__Bacteria;p__Bacillota;c__Bacilli;o__Lactobacillales;f__Enterococcaceae;g__Enterococcus_B;s__	taxonomic classification defined by topology and ANI	topological placement and ANI have congruent species assignments	GCF_015751045.1, s__Enterococcus_B lactis, 95.0, 94.43, 0.822; GCF_001544215.1, s__Enterococcus_B durans, 95.0, 81.79, 0.421; GCF_011038845.1, s__Enterococcus_B sp011038845, 95.0, 81.61, 0.539; GCF_000271405.2, s__Enterococcus_B hirae, 95.0, 80.59, 0.407; GCA_015680865.1, s__Enterococcus_B lacertideformus, 95.0, 80.39, 0.409; GCF_002140175.1, s__Enterococcus_B sp002140175, 95.0, 80.0, 0.35; GCF_0…	96.46	11	N/A	N/A
609596-20-s-srp-R9-Guppy-FAST-new	d__Bacteria;p__Bacillota;c__Bacilli;o__Lactobacillales;f__Enterococcaceae;g__Enterococcus_B;s__Enterococcus_B faecium	GCF_001544255.1	95	d__Bacteria;p__Bacillota;c__Bacilli;o__Lactobacillales;f__Enterococcaceae;g__Enterococcus_B;s__Enterococcus_B faecium	99.33	0.939	GCF_001544255.1	95	d__Bacteria;p__Bacillota;c__Bacilli;o__Lactobacillales;f__Enterococcaceae;g__Enterococcus_B;s__Enterococcus_B faecium	99.33	0.939	d__Bacteria;p__Bacillota;c__Bacilli;o__Lactobacillales;f__Enterococcaceae;g__Enterococcus_B;s__	taxonomic classification defined by topology and ANI	topological placement and ANI have congruent species assignments	GCF_015751045.1, s__Enterococcus_B lactis, 95.0, 94.42, 0.818; GCF_001544215.1, s__Enterococcus_B durans, 95.0, 81.75, 0.415; GCF_011038845.1, s__Enterococcus_B sp011038845, 95.0, 81.57, 0.55; GCF_000271405.2, s__Enterococcus_B hirae, 95.0, 80.51, 0.41; GCA_015680865.1, s__Enterococcus_B lacertideformus, 95.0, 80.4, 0.417; GCF_013394305.1, s__Enterococcus_B pernyi, 96.3614, 80.2, 0.351; GCF_00395…	96.46	11	N/A	N/A
609596-20-s-srp-R9-Guppy-HAC-new	d__Bacteria;p__Bacillota;c__Bacilli;o__Lactobacillales;f__Enterococcaceae;g__Enterococcus_B;s__Enterococcus_B faecium	GCF_001544255.1	95	d__Bacteria;p__Bacillota;c__Bacilli;o__Lactobacillales;f__Enterococcaceae;g__Enterococcus_B;s__Enterococcus_B faecium	99.26	0.947	GCF_001544255.1	95	d__Bacteria;p__Bacillota;c__Bacilli;o__Lactobacillales;f__Enterococcaceae;g__Enterococcus_B;s__Enterococcus_B faecium	99.26	0.947	d__Bacteria;p__Bacillota;c__Bacilli;o__Lactobacillales;f__Enterococcaceae;g__Enterococcus_B;s__	taxonomic classification defined by topology and ANI	topological placement and ANI have congruent species assignments	GCF_015751045.1, s__Enterococcus_B lactis, 95.0, 94.48, 0.814; GCF_001544215.1, s__Enterococcus_B durans, 95.0, 82.12, 0.426; GCF_011038845.1, s__Enterococcus_B sp011038845, 95.0, 81.69, 0.535; GCF_000271405.2, s__Enterococcus_B hirae, 95.0, 80.71, 0.411; GCA_015680865.1, s__Enterococcus_B lacertideformus, 95.0, 80.36, 0.408; GCF_013394305.1, s__Enterococcus_B pernyi, 96.3614, 80.2, 0.342; GCF_00…	96.46	11	N/A	N/A
[truncated: 59 more rows]

## Sheet: entfael
user_genome	classification	fastani_reference	fastani_reference_radius	fastani_taxonomy	fastani_ani	fastani_af	closest_placement_reference	closest_placement_radius	closest_placement_taxonomy	closest_placement_ani	closest_placement_af	pplacer_taxonomy	classification_method	note	other_related_references(genome_id,species_name,radius,ANI,AF)	msa_percent	translation_table	red_value	warnings
[truncated: 59 more rows]

[truncated: 6 more sheets: esccol, klepne, klequa, pseaer, staaur, strpyo]
