# Supplementary material for: Benchmarking Illumina and Oxford Nanopore Technologies (ONT) sequencing platforms for whole genome sequencing of bacterial genomes and use in clinical microbiology
Source: Research Square preprint supplement (doi:10.21203/rs.3.rs-7036422/v1), 2025-07-10
Supplement: Supplementary file 2 [file 965a85db28220695238be09d.xlsx]

## Sheet: Read_me
Sheet	Description
Sheet 2	Number of variants detected from pilon and snippy
Sheet 3	Read alignment percentage to respective references
Headers	Description
Samples	Bacterial isolates shortname
Flowcell	ONT Flowcell chemistry
Basecaller	Basecaller used
Mode	Basecalling mode
SNPS	Number of SNPs identified with pilon
Indels	Number of Indels identified with pilon

## Sheet: Pilon_variants
Samples	Flowcell	Basecaller	Mode	SNPS	Indels		Samples	Snippy SNPS	Mode
acibau_r	Illumina	Illumina	Illumina	17	0		bursta	111	Illumina
acibau_r	R10.4.1	Guppy	FAST	73	1		camjej	5	Illumina
acibau_r	R10.4.1	Guppy	HAC	44	0		entfael	3	Illumina
acibau_r	R10.4.1	Guppy	SUP	44	0		esccol	16	Illumina
acibau_r	R10.4.1	Dorado	HAC	44	0		klequa	12	Illumina
acibau_r	R10.4.1	Rerio	SUP	44	0		pseaer	47	Illumina
acibau_r	R10.4.1	Dorado	FAST	95	3		staaur	1	Illumina
acibau_r	R10.4.1	Dorado	SUP	44	0		strpyo	2	Illumina
acibau_r	R9.4.1	Guppy	FAST	47	3
acibau_r	R9.4.1	Guppy	HAC	47	3
acibau_r	R9.4.1	Guppy	SUP	47	3
acibau_r	R9.4.1	Dorado	FAST	50	1
acibau_r	R9.4.1	Dorado	HAC	44	1
acibau_r	R9.4.1	Dorado	SUP	43	0
acibau_rn	Illumina	Illumina	Illumina	4	0
acibau_rn	R10.4.1	Guppy	FAST	44	2
acibau_rn	R10.4.1	Guppy	HAC	43	3
acibau_rn	R10.4.1	Guppy	SUP	50	14
acibau_rn	R10.4.1	Dorado	HAC	43	3
acibau_rn	R10.4.1	Rerio	SUP	48	9
acibau_rn	R10.4.1	Dorado	FAST	41	1
acibau_rn	R10.4.1	Dorado	SUP	50	18
acibau_rn	R9.4.1	Guppy	FAST	31	0
acibau_rn	R9.4.1	Guppy	HAC	32	0
acibau_rn	R9.4.1	Guppy	SUP	32	0
acibau_rn	R9.4.1	Dorado	FAST	31	0
acibau_rn	R9.4.1	Dorado	HAC	32	0
acibau_rn	R9.4.1	Dorado	SUP	32	0
acipit	Illumina	Illumina	Illumina	18	0
acipit	R10.4.1	Guppy	FAST	54	6
acipit	R10.4.1	Guppy	HAC	41	1
acipit	R10.4.1	Guppy	SUP	40	1
acipit	R10.4.1	Dorado	HAC	40	1
acipit	R10.4.1	Rerio	SUP	40	1
acipit	R10.4.1	Dorado	FAST	62	4
acipit	R10.4.1	Dorado	SUP	40	1
acipit	R9.4.1	Guppy	FAST	43	1
acipit	R9.4.1	Guppy	HAC	40	0
acipit	R9.4.1	Guppy	SUP	39	0
acipit	R9.4.1	Dorado	FAST	42	2
acipit	R9.4.1	Dorado	HAC	42	2
acipit	R9.4.1	Dorado	SUP	42	2
bursta	Illumina	Illumina	Illumina	114	210
bursta	R10.4.1	Guppy	FAST	69	14
bursta	R10.4.1	Guppy	HAC	59	86
bursta	R10.4.1	Guppy	SUP	60	134
bursta	R10.4.1	Rerio	SUP	61	142
bursta	R10.4.1	Dorado	FAST	54	12
bursta	R10.4.1	Dorado	HAC	59	82
bursta	R10.4.1	Dorado	SUP	60	126
bursta	R10.4.1	Dorado-5kHz	SUP	61	192
bursta	R9.4.1	Guppy	FAST	59	18
bursta	R9.4.1	Guppy	HAC	61	51
bursta	R9.4.1	Guppy	SUP	61	77
bursta	R9.4.1	Dorado	FAST	59	22
bursta	R9.4.1	Dorado	HAC	61	39
bursta	R9.4.1	Dorado	SUP	61	68
camjej	Illumina	Illumina	Illumina	6	3
camjej	R10.4.1	Guppy	FAST	10331	218
camjej	R10.4.1	Guppy	HAC	9858	195
camjej	R10.4.1	Guppy	SUP	10045	216
camjej	R10.4.1	Rerio	SUP	10080	202
camjej	R10.4.1	Dorado	FAST	10228	201
camjej	R10.4.1	Dorado	HAC	10018	210
camjej	R10.4.1	Dorado	SUP	10008	217
camjej	R10.4.1	Dorado-5kHz	SUP	10669	303
camjej	R9.4.1	Guppy	FAST	10198	197
camjej	R9.4.1	Guppy	HAC	10251	215
camjej	R9.4.1	Guppy	SUP	10229	214
camjej	R9.4.1	Dorado	FAST	10151	190
camjej	R9.4.1	Dorado	HAC	10181	194
camjej	R9.4.1	Dorado	SUP	10138	194
entfae_r	Illumina	Illumina	Illumina	35	1
entfae_r	R10.4.1	Guppy	FAST	76	1
entfae_r	R10.4.1	Guppy	HAC	79	2
entfae_r	R10.4.1	Guppy	SUP	77	4
entfae_r	R10.4.1	Dorado	HAC	77	4
entfae_r	R10.4.1	Rerio	SUP	77	5
entfae_r	R10.4.1	Dorado	FAST	77	1
entfae_r	R10.4.1	Dorado	SUP	77	4
entfae_r	R9.4.1	Guppy	FAST	81	2
entfae_r	R9.4.1	Guppy	HAC	77	3
entfae_r	R9.4.1	Guppy	SUP	77	3
entfae_r	R9.4.1	Dorado	FAST	75	1
entfae_r	R9.4.1	Dorado	HAC	77	3
entfae_r	R9.4.1	Dorado	SUP	77	3
entfae_s	Illumina	Illumina	Illumina	42	2
entfae_s	R10.4.1	Guppy	FAST	78	4
entfae_s	R10.4.1	Guppy	HAC	80	6
entfae_s	R10.4.1	Guppy	SUP	80	7
entfae_s	R10.4.1	Dorado	HAC	80	6
entfae_s	R10.4.1	Rerio	SUP	80	8
entfae_s	R10.4.1	Dorado	FAST	77	3
entfae_s	R10.4.1	Dorado	SUP	80	8
entfae_s	R9.4.1	Guppy	FAST	75	4
entfae_s	R9.4.1	Guppy	HAC	79	5
entfae_s	R9.4.1	Guppy	SUP	80	5
entfae_s	R9.4.1	Dorado	FAST	77	4
entfae_s	R9.4.1	Dorado	HAC	79	5
entfae_s	R9.4.1	Dorado	SUP	80	5
entfael	Illumina	Illumina	Illumina	13	58
entfael	R10.4.1	Guppy	FAST	37	14
entfael	R10.4.1	Guppy	HAC	34	53
entfael	R10.4.1	Guppy	SUP	33	66
entfael	R10.4.1	Rerio	SUP	71	79
entfael	R10.4.1	Dorado	FAST	55	17
entfael	R10.4.1	Dorado	HAC	55	58
entfael	R10.4.1	Dorado	SUP	73	77
entfael	R10.4.1	Dorado-5kHz	SUP	87	113
entfael	R9.4.1	Guppy	FAST	66	7
entfael	R9.4.1	Guppy	HAC	42	22
entfael	R9.4.1	Guppy	SUP	48	35
entfael	R9.4.1	Dorado	FAST	90	9
entfael	R9.4.1	Dorado	HAC	42	20
entfael	R9.4.1	Dorado	SUP	38	27
esccol	Illumina	Illumina	Illumina	37	6
esccol	R10.4.1	Guppy	FAST	136	8
esccol	R10.4.1	Guppy	HAC	129	16
esccol	R10.4.1	Guppy	SUP	147	23
esccol	R10.4.1	Rerio	SUP	146	21
esccol	R10.4.1	Dorado	FAST	130	7
esccol	R10.4.1	Dorado	HAC	129	18
esccol	R10.4.1	Dorado	SUP	146	23
esccol	R10.4.1	Dorado-5kHz	SUP	156	34
esccol	R9.4.1	Guppy	FAST	127	11
esccol	R9.4.1	Guppy	HAC	129	12
esccol	R9.4.1	Guppy	SUP	124	12
esccol	R9.4.1	Dorado	FAST	124	10
esccol	R9.4.1	Dorado	HAC	127	11
esccol	R9.4.1	Dorado	SUP	132	15
esccol_r	Illumina	Illumina	Illumina	15	0
esccol_r	R10.4.1	Guppy	FAST	99	2
esccol_r	R10.4.1	Guppy	HAC	20	1
esccol_r	R10.4.1	Guppy	SUP	16	1
esccol_r	R10.4.1	Dorado	HAC	15	1
esccol_r	R10.4.1	Rerio	SUP	15	2
esccol_r	R10.4.1	Dorado	FAST	65	1
esccol_r	R10.4.1	Dorado	SUP	15	1
esccol_r	R9.4.1	Guppy	FAST	15	0
esccol_r	R9.4.1	Guppy	HAC	31	0
esccol_r	R9.4.1	Guppy	SUP	64	1
esccol_r	R9.4.1	Dorado	FAST	16	2
esccol_r	R9.4.1	Dorado	HAC	76	0
esccol_r	R9.4.1	Dorado	SUP	36	0
esccol_s	Illumina	Illumina	Illumina	2	0
esccol_s	R10.4.1	Guppy	FAST	96	0
esccol_s	R10.4.1	Guppy	HAC	17	0
esccol_s	R10.4.1	Guppy	SUP	17	0
esccol_s	R10.4.1	Rerio	SUP	13	0
esccol_s	R9.4.1	Guppy	FAST	12	0
esccol_s	R9.4.1	Guppy	HAC	12	0
esccol_s	R9.4.1	Guppy	SUP	12	0
esccol_s	R10.4.1	Dorado	HAC	13	0
esccol_s	R10.4.1	Dorado	FAST	74	0
esccol_s	R10.4.1	Dorado	SUP	13	0
esccol_s	R9.4.1	Dorado	FAST	12	0
esccol_s	R9.4.1	Dorado	HAC	13	0
esccol_s	R9.4.1	Dorado	SUP	13	0
klepne_s	Illumina	Illumina	Illumina	16	1
klepne_s	R10.4.1	Guppy	FAST	85	12
klepne_s	R10.4.1	Guppy	HAC	30	3
klepne_s	R10.4.1	Guppy	SUP	30	3
klepne_s	R10.4.1	Dorado	HAC	31	14
klepne_s	R10.4.1	Rerio	SUP	29	1
klepne_s	R10.4.1	Dorado	FAST	66	6
klepne_s	R10.4.1	Dorado	SUP	29	1
klepne_s	R9.4.1	Guppy	FAST	32	6
klepne_s	R9.4.1	Guppy	HAC	33	14
klepne_s	R9.4.1	Guppy	SUP	35	3
klepne_s	R9.4.1	Dorado	FAST	36	9
klepne_s	R9.4.1	Dorado	HAC	33	14
klepne_s	R9.4.1	Dorado	SUP	30	3
klequa	Illumina	Illumina	Illumina	12	11
klequa	R10.4.1	Guppy	FAST	36	2
klequa	R10.4.1	Guppy	HAC	3	1
klequa	R10.4.1	Guppy	SUP	2	4
klequa	R10.4.1	Rerio	SUP	1	6
klequa	R10.4.1	Dorado	FAST	15	0
klequa	R10.4.1	Dorado	HAC	2	2
klequa	R10.4.1	Dorado	SUP	1	6
klequa	R10.4.1	Dorado-5kHz	SUP	0	11
klequa	R9.4.1	Guppy	FAST	0	0
klequa	R9.4.1	Guppy	HAC	0	1
klequa	R9.4.1	Guppy	SUP	0	2
klequa	R9.4.1	Dorado	FAST	0	0
klequa	R9.4.1	Dorado	HAC	0	1
klequa	R9.4.1	Dorado	SUP	0	1
pseaer	Illumina	Illumina	Illumina	187	5
pseaer	R10.4.1	Guppy	FAST	430	12
pseaer	R10.4.1	Guppy	HAC	459	25
pseaer	R10.4.1	Guppy	SUP	478	32
pseaer	R10.4.1	Rerio	SUP	474	33
pseaer	R10.4.1	Dorado	FAST	429	11
pseaer	R10.4.1	Dorado	HAC	463	36
pseaer	R10.4.1	Dorado	SUP	466	36
pseaer	R10.4.1	Dorado-5kHz	SUP	520	59
pseaer	R9.4.1	Guppy	FAST	437	13
pseaer	R9.4.1	Guppy	HAC	452	15
pseaer	R9.4.1	Guppy	SUP	434	14
pseaer	R9.4.1	Dorado	FAST	451	13
pseaer	R9.4.1	Dorado	HAC	462	16
pseaer	R9.4.1	Dorado	SUP	442	16
pseaer_r	Illumina	Illumina	Illumina	26	3
pseaer_r	R10.4.1	Guppy	FAST	40	0
pseaer_r	R10.4.1	Guppy	HAC	37	3
pseaer_r	R10.4.1	Guppy	SUP	39	4
pseaer_r	R10.4.1	Dorado	HAC	39	4
pseaer_r	R10.4.1	Rerio	SUP	37	3
pseaer_r	R10.4.1	Dorado	FAST	38	2
pseaer_r	R10.4.1	Dorado	SUP	39	4
pseaer_r	R9.4.1	Guppy	FAST	39	2
pseaer_r	R9.4.1	Guppy	HAC	39	2
pseaer_r	R9.4.1	Guppy	SUP	39	2
pseaer_r	R9.4.1	Dorado	FAST	39	2
pseaer_r	R9.4.1	Dorado	HAC	39	4
pseaer_r	R9.4.1	Dorado	SUP	39	3
pseaer_s	Illumina	Illumina	Illumina	5	0
pseaer_s	R10.4.1	Guppy	FAST	62	0
pseaer_s	R10.4.1	Guppy	HAC	8	0
pseaer_s	R10.4.1	Guppy	SUP	7	0
pseaer_s	R10.4.1	Dorado	HAC	7	0
pseaer_s	R10.4.1	Rerio	SUP	7	0
pseaer_s	R10.4.1	Dorado	FAST	57	0
pseaer_s	R10.4.1	Dorado	SUP	7	0
pseaer_s	R9.4.1	Guppy	FAST	12	0
pseaer_s	R9.4.1	Guppy	HAC	12	0
pseaer_s	R9.4.1	Guppy	SUP	13	0
pseaer_s	R9.4.1	Dorado	FAST	12	0
pseaer_s	R9.4.1	Dorado	HAC	13	0
pseaer_s	R9.4.1	Dorado	SUP	9	0
staaur	Illumina	Illumina	Illumina	1	1
staaur	R10.4.1	Guppy	FAST	2	1
staaur	R10.4.1	Guppy	HAC	1	1
staaur	R10.4.1	Guppy	SUP	0	1
staaur	R10.4.1	Rerio	SUP	0	1
staaur	R10.4.1	Dorado	FAST	1	1
staaur	R10.4.1	Dorado	HAC	0	1
staaur	R10.4.1	Dorado	SUP	0	1
staaur	R10.4.1	Dorado-5kHz	SUP	0	2
staaur	R9.4.1	Guppy	FAST	3	1
staaur	R9.4.1	Guppy	HAC	0	1
staaur	R9.4.1	Guppy	SUP	0	1
staaur	R9.4.1	Dorado	FAST	2	1
staaur	R9.4.1	Dorado	HAC	0	1
staaur	R9.4.1	Dorado	SUP	0	1
staaur_r	Illumina	Illumina	Illumina	5	0
staaur_r	R10.4.1	Guppy	FAST	22	0
staaur_r	R10.4.1	Guppy	HAC	23	0
staaur_r	R10.4.1	Guppy	SUP	23	0
staaur_r	R10.4.1	Dorado	HAC	23	0
staaur_r	R10.4.1	Rerio	SUP	23	0
staaur_r	R10.4.1	Dorado	FAST	23	0
staaur_r	R10.4.1	Dorado	SUP	23	0
staaur_r	R9.4.1	Guppy	FAST	22	0
staaur_r	R9.4.1	Guppy	HAC	23	0
staaur_r	R9.4.1	Guppy	SUP	22	0
staaur_r	R9.4.1	Dorado	FAST	22	0
staaur_r	R9.4.1	Dorado	HAC	23	0
staaur_r	R9.4.1	Dorado	SUP	23	0
staaur_s	Illumina	Illumina	Illumina	8	0
staaur_s	R10.4.1	Guppy	FAST	11	0
staaur_s	R10.4.1	Guppy	HAC	12	0
staaur_s	R10.4.1	Guppy	SUP	12	0
staaur_s	R10.4.1	Dorado	HAC	12	0
staaur_s	R10.4.1	Rerio	SUP	12	0
staaur_s	R10.4.1	Dorado	FAST	11	0
staaur_s	R10.4.1	Dorado	SUP	12	0
staaur_s	R9.4.1	Guppy	FAST	12	0
staaur_s	R9.4.1	Guppy	HAC	12	0
staaur_s	R9.4.1	Guppy	SUP	12	0
staaur_s	R9.4.1	Dorado	FAST	12	0
staaur_s	R9.4.1	Dorado	HAC	12	0
staaur_s	R9.4.1	Dorado	SUP	12	0
strpyo	Illumina	Illumina	Illumina	6	31
strpyo	R10.4.1	Guppy	FAST	7	14
strpyo	R10.4.1	Guppy	HAC	7	29
strpyo	R10.4.1	Guppy	SUP	7	37
strpyo	R10.4.1	Rerio	SUP	7	36
strpyo	R10.4.1	Dorado	FAST	8	10
strpyo	R10.4.1	Dorado	HAC	7	30
strpyo	R10.4.1	Dorado	SUP	7	37
strpyo	R10.4.1	Dorado-5kHz	SUP	7	44
strpyo	R9.4.1	Guppy	FAST	7	3
strpyo	R9.4.1	Guppy	HAC	7	13
strpyo	R9.4.1	Guppy	SUP	7	21
strpyo	R9.4.1	Dorado	FAST	7	4
strpyo	R9.4.1	Dorado	HAC	7	10
strpyo	R9.4.1	Dorado	SUP	7	16

## Sheet: Alignment_percentage
Samples	Flowcell	Basecaller	Mode	Alignment_percentage
acibau_r	R9.4.1	Guppy	FAST	99.83
acibau_r	R9.4.1	Guppy	HAC	99.83
acibau_r	R9.4.1	Guppy	SUP	99.83
acibau_r	R9.4.1	Dorado	FAST	99.83
acibau_r	R9.4.1	Dorado	HAC	99.83
acibau_r	R9.4.1	Dorado	SUP	99.83
acibau_r	R10.4.1	Guppy	FAST	99.92
acibau_r	R10.4.1	Guppy	HAC	99.83
acibau_r	R10.4.1	Guppy	SUP	99.82
acibau_r	R10.4.1	Dorado	FAST	99.87
acibau_r	R10.4.1	Dorado	HAC	99.8
acibau_r	R10.4.1	Dorado	SUP	99.8
acibau_r	R10.4.1	Rerio	SUP	99.79
acibau_rn	R9.4.1	Guppy	FAST	99.94
acibau_rn	R9.4.1	Guppy	HAC	99.94
acibau_rn	R9.4.1	Guppy	SUP	99.94
acibau_rn	R9.4.1	Dorado	FAST	99.95
acibau_rn	R9.4.1	Dorado	HAC	99.94
acibau_rn	R9.4.1	Dorado	SUP	99.95
acibau_rn	R10.4.1	Guppy	FAST	99.18
acibau_rn	R10.4.1	Guppy	HAC	99.15
acibau_rn	R10.4.1	Guppy	SUP	99.12
acibau_rn	R10.4.1	Dorado	FAST	99.19
acibau_rn	R10.4.1	Dorado	HAC	99.2
acibau_rn	R10.4.1	Dorado	SUP	99.19
acibau_rn	R10.4.1	Rerio	SUP	99.18
acipit	R9.4.1	Guppy	FAST	99.91
acipit	R9.4.1	Guppy	HAC	99.92
acipit	R9.4.1	Guppy	SUP	99.92
acipit	R9.4.1	Dorado	FAST	99.92
acipit	R9.4.1	Dorado	HAC	99.92
acipit	R9.4.1	Dorado	SUP	99.92
acipit	R10.4.1	Guppy	FAST	98.8
acipit	R10.4.1	Guppy	HAC	98.74
acipit	R10.4.1	Guppy	SUP	98.75
acipit	R10.4.1	Dorado	FAST	98.66
acipit	R10.4.1	Dorado	HAC	98.78
acipit	R10.4.1	Dorado	SUP	98.8
acipit	R10.4.1	Rerio	SUP	98.8
bursta	R9.4.1	Guppy	FAST	91.91
bursta	R9.4.1	Guppy	HAC	92.9
bursta	R9.4.1	Guppy	SUP	93.36
bursta	R9.4.1	Dorado	FAST	94.38
bursta	R9.4.1	Dorado	HAC	94.38
bursta	R9.4.1	Dorado	SUP	94.52
bursta	R10.4.1	Guppy	FAST	73.44
bursta	R10.4.1	Guppy	HAC	84.87
bursta	R10.4.1	Guppy	SUP	85.75
bursta	R10.4.1	Dorado	FAST	79.02
bursta	R10.4.1	Dorado	HAC	87.53
bursta	R10.4.1	Dorado	SUP	87.54
bursta	R10.4.1	Rerio	SUP	87.78
bursta	R10.4.1	Dorada-5kHz	SUP	88.33
camjej	R9.4.1	Guppy	FAST	98.32
camjej	R9.4.1	Guppy	HAC	98.4
camjej	R9.4.1	Guppy	SUP	98.42
camjej	R9.4.1	Dorado	FAST	98.49
camjej	R9.4.1	Dorado	HAC	98.49
camjej	R9.4.1	Dorado	SUP	98.49
camjej	R10.4.1	Guppy	FAST	97.35
camjej	R10.4.1	Guppy	HAC	97.47
camjej	R10.4.1	Guppy	SUP	97.49
camjej	R10.4.1	Dorado	FAST	97.39
camjej	R10.4.1	Dorado	HAC	97.47
camjej	R10.4.1	Dorado	SUP	97.5
camjej	R10.4.1	Rerio	SUP	97.48
camjej	R10.4.1	Dorada-5kHz	SUP	98.5
entfae_r	R9.4.1	Guppy	FAST	99.97
entfae_r	R9.4.1	Guppy	HAC	99.97
entfae_r	R9.4.1	Guppy	SUP	99.97
entfae_r	R9.4.1	Dorado	FAST	99.97
entfae_r	R9.4.1	Dorado	HAC	99.97
entfae_r	R9.4.1	Dorado	SUP	99.97
entfae_r	R10.4.1	Guppy	FAST	99.88
entfae_r	R10.4.1	Guppy	HAC	99.89
entfae_r	R10.4.1	Guppy	SUP	99.89
entfae_r	R10.4.1	Dorado	FAST	99.87
entfae_r	R10.4.1	Dorado	HAC	99.88
entfae_r	R10.4.1	Dorado	SUP	99.88
entfae_r	R10.4.1	Rerio	SUP	99.88
entfae_s	R9.4.1	Guppy	FAST	99.96
entfae_s	R9.4.1	Guppy	HAC	99.96
entfae_s	R9.4.1	Guppy	SUP	99.96
entfae_s	R9.4.1	Dorado	FAST	99.96
entfae_s	R9.4.1	Dorado	HAC	99.95
entfae_s	R9.4.1	Dorado	SUP	99.95
entfae_s	R10.4.1	Guppy	FAST	99.86
entfae_s	R10.4.1	Guppy	HAC	99.86
entfae_s	R10.4.1	Guppy	SUP	99.86
entfae_s	R10.4.1	Dorado	FAST	99.84
entfae_s	R10.4.1	Dorado	HAC	99.84
entfae_s	R10.4.1	Dorado	SUP	99.84
entfae_s	R10.4.1	Rerio	SUP	99.84
entfael	R9.4.1	Guppy	FAST	99.97
entfael	R9.4.1	Guppy	HAC	99.97
entfael	R9.4.1	Guppy	SUP	99.97
entfael	R9.4.1	Dorado	FAST	99.97
entfael	R9.4.1	Dorado	HAC	99.97
entfael	R9.4.1	Dorado	SUP	99.97
entfael	R10.4.1	Guppy	FAST	99.92
entfael	R10.4.1	Guppy	HAC	99.92
entfael	R10.4.1	Guppy	SUP	99.92
entfael	R10.4.1	Dorado	FAST	99.9
entfael	R10.4.1	Dorado	HAC	99.91
entfael	R10.4.1	Dorado	SUP	99.91
entfael	R10.4.1	Rerio	SUP	99.9
entfael	R10.4.1	Dorada-5kHz	SUP	99.98
esccol	R9.4.1	Guppy	FAST	94.26
esccol	R9.4.1	Guppy	HAC	94.5
esccol	R9.4.1	Guppy	SUP	94.68
esccol	R9.4.1	Dorado	FAST	94.29
esccol	R9.4.1	Dorado	HAC	94.5
esccol	R9.4.1	Dorado	SUP	94.57
esccol	R10.4.1	Guppy	FAST	86.65
esccol	R10.4.1	Guppy	HAC	88.41
esccol	R10.4.1	Guppy	SUP	89.08
esccol	R10.4.1	Dorado	FAST	85.25
esccol	R10.4.1	Dorado	HAC	87.59
esccol	R10.4.1	Dorado	SUP	88.39
esccol	R10.4.1	Rerio	SUP	88.67
esccol	R10.4.1	Dorada-5kHz	SUP	92.39
esccol_r	R9.4.1	Guppy	FAST	99.96
esccol_r	R9.4.1	Guppy	HAC	99.96
esccol_r	R9.4.1	Guppy	SUP	99.96
esccol_r	R9.4.1	Dorado	FAST	99.96
esccol_r	R9.4.1	Dorado	HAC	99.96
esccol_r	R9.4.1	Dorado	SUP	99.96
esccol_r	R10.4.1	Guppy	FAST	99.76
esccol_r	R10.4.1	Guppy	HAC	99.82
esccol_r	R10.4.1	Guppy	SUP	99.82
esccol_r	R10.4.1	Dorado	FAST	99.78
esccol_r	R10.4.1	Dorado	HAC	99.81
esccol_r	R10.4.1	Dorado	SUP	99.81
esccol_r	R10.4.1	Rerio	SUP	99.81
esccol_s	R9.4.1	Guppy	FAST	99.99
esccol_s	R9.4.1	Guppy	HAC	99.99
esccol_s	R9.4.1	Guppy	SUP	99.99
esccol_s	R9.4.1	Dorado	FAST	99.99
esccol_s	R9.4.1	Dorado	HAC	99.99
esccol_s	R9.4.1	Dorado	SUP	99.99
esccol_s	R10.4.1	Guppy	FAST	99.93
esccol_s	R10.4.1	Guppy	HAC	99.94
esccol_s	R10.4.1	Guppy	SUP	99.93
esccol_s	R10.4.1	Dorado	FAST	99.93
esccol_s	R10.4.1	Dorado	HAC	99.93
esccol_s	R10.4.1	Dorado	SUP	99.93
esccol_s	R10.4.1	Rerio	SUP	99.93
klepne_s	R9.4.1	Guppy	FAST	99.56
klepne_s	R9.4.1	Guppy	HAC	99.81
klepne_s	R9.4.1	Guppy	SUP	99.73
klepne_s	R9.4.1	Dorado	FAST	99.83
klepne_s	R9.4.1	Dorado	HAC	99.82
klepne_s	R9.4.1	Dorado	SUP	99.82
klepne_s	R10.4.1	Guppy	FAST	99.65
klepne_s	R10.4.1	Guppy	HAC	99.7
klepne_s	R10.4.1	Guppy	SUP	99.71
klepne_s	R10.4.1	Dorado	FAST	99.64
klepne_s	R10.4.1	Dorado	HAC	99.68
klepne_s	R10.4.1	Dorado	SUP	99.7
klepne_s	R10.4.1	Rerio	SUP	99.69
klequa	R9.4.1	Guppy	FAST	99.98
klequa	R9.4.1	Guppy	HAC	99.98
klequa	R9.4.1	Guppy	SUP	99.98
klequa	R9.4.1	Dorado	FAST	99.98
klequa	R9.4.1	Dorado	HAC	99.98
klequa	R9.4.1	Dorado	SUP	99.98
klequa	R10.4.1	Guppy	FAST	99.76
klequa	R10.4.1	Guppy	HAC	99.8
klequa	R10.4.1	Guppy	SUP	99.8
klequa	R10.4.1	Dorado	FAST	99.77
klequa	R10.4.1	Dorado	HAC	99.79
klequa	R10.4.1	Dorado	SUP	99.8
klequa	R10.4.1	Rerio	SUP	99.79
klequa	R10.4.1	Dorada-5kHz	SUP	99.93
pseaer	R9.4.1	Guppy	FAST	99.96
pseaer	R9.4.1	Guppy	HAC	99.96
pseaer	R9.4.1	Guppy	SUP	99.96
pseaer	R9.4.1	Dorado	FAST	99.97
pseaer	R9.4.1	Dorado	HAC	99.96
pseaer	R9.4.1	Dorado	SUP	99.86
pseaer	R10.4.1	Guppy	FAST	99.66
pseaer	R10.4.1	Guppy	HAC	99.7
pseaer	R10.4.1	Guppy	SUP	99.71
pseaer	R10.4.1	Dorado	FAST	99.67
pseaer	R10.4.1	Dorado	HAC	99.69
pseaer	R10.4.1	Dorado	SUP	99.69
pseaer	R10.4.1	Rerio	SUP	99.69
pseaer	R10.4.1	Dorada-5kHz	SUP	99.95
pseaer_r	R9.4.1	Guppy	FAST	99.96
pseaer_r	R9.4.1	Guppy	HAC	99.97
pseaer_r	R9.4.1	Guppy	SUP	99.97
pseaer_r	R9.4.1	Dorado	FAST	99.97
pseaer_r	R9.4.1	Dorado	HAC	99.97
pseaer_r	R9.4.1	Dorado	SUP	99.97
pseaer_r	R10.4.1	Guppy	FAST	99.87
pseaer_r	R10.4.1	Guppy	HAC	99.88
pseaer_r	R10.4.1	Guppy	SUP	99.89
pseaer_r	R10.4.1	Dorado	FAST	99.87
pseaer_r	R10.4.1	Dorado	HAC	99.87
pseaer_r	R10.4.1	Dorado	SUP	99.88
pseaer_r	R10.4.1	Rerio	SUP	99.88
pseaer_s	R9.4.1	Guppy	FAST	99.97
pseaer_s	R9.4.1	Guppy	HAC	99.97
pseaer_s	R9.4.1	Guppy	SUP	99.97
pseaer_s	R9.4.1	Dorado	FAST	99.97
pseaer_s	R9.4.1	Dorado	HAC	99.97
pseaer_s	R9.4.1	Dorado	SUP	99.97
pseaer_s	R10.4.1	Guppy	FAST	99.83
pseaer_s	R10.4.1	Guppy	HAC	99.82
pseaer_s	R10.4.1	Guppy	SUP	99.83
pseaer_s	R10.4.1	Dorado	FAST	99.83
pseaer_s	R10.4.1	Dorado	HAC	99.83
pseaer_s	R10.4.1	Dorado	SUP	99.82
pseaer_s	R10.4.1	Rerio	SUP	99.83
staaur	R9.4.1	Guppy	FAST	99.85
staaur	R9.4.1	Guppy	HAC	99.82
staaur	R9.4.1	Guppy	SUP	99.82
staaur	R9.4.1	Dorado	FAST	99.82
staaur	R9.4.1	Dorado	HAC	99.79
staaur	R9.4.1	Dorado	SUP	99.79
staaur	R10.4.1	Guppy	FAST	99.95
staaur	R10.4.1	Guppy	HAC	99.9
staaur	R10.4.1	Guppy	SUP	99.9
staaur	R10.4.1	Dorado	FAST	99.92
staaur	R10.4.1	Dorado	HAC	99.89
staaur	R10.4.1	Dorado	SUP	99.89
staaur	R10.4.1	Rerio	SUP	99.89
staaur	R10.4.1	Dorada-5kHz	SUP	99.9
staaur_r	R9.4.1	Guppy	FAST	99.94
staaur_r	R9.4.1	Guppy	HAC	99.93
staaur_r	R9.4.1	Guppy	SUP	99.93
staaur_r	R9.4.1	Dorado	FAST	99.93
staaur_r	R9.4.1	Dorado	HAC	99.92
staaur_r	R9.4.1	Dorado	SUP	99.92
staaur_r	R10.4.1	Guppy	FAST	99.9
staaur_r	R10.4.1	Guppy	HAC	99.87
staaur_r	R10.4.1	Guppy	SUP	99.86
staaur_r	R10.4.1	Dorado	FAST	99.85
staaur_r	R10.4.1	Dorado	HAC	99.84
staaur_r	R10.4.1	Dorado	SUP	99.84
staaur_r	R10.4.1	Rerio	SUP	99.84
staaur_s	R9.4.1	Guppy	FAST	99.95
staaur_s	R9.4.1	Guppy	HAC	99.94
staaur_s	R9.4.1	Guppy	SUP	99.94
staaur_s	R9.4.1	Dorado	FAST	99.94
staaur_s	R9.4.1	Dorado	HAC	99.94
staaur_s	R9.4.1	Dorado	SUP	99.94
staaur_s	R10.4.1	Guppy	FAST	99.93
staaur_s	R10.4.1	Guppy	HAC	99.92
staaur_s	R10.4.1	Guppy	SUP	99.92
staaur_s	R10.4.1	Dorado	FAST	99.92
staaur_s	R10.4.1	Dorado	HAC	99.91
staaur_s	R10.4.1	Dorado	SUP	99.91
staaur_s	R10.4.1	Rerio	SUP	99.91
strpyo	R9.4.1	Guppy	FAST	99.84
strpyo	R9.4.1	Guppy	HAC	99.83
strpyo	R9.4.1	Guppy	SUP	99.83
strpyo	R9.4.1	Dorado	FAST	99.83
strpyo	R9.4.1	Dorado	HAC	99.83
strpyo	R9.4.1	Dorado	SUP	99.83
strpyo	R10.4.1	Guppy	FAST	99.58
strpyo	R10.4.1	Guppy	HAC	99.56
strpyo	R10.4.1	Guppy	SUP	99.56
strpyo	R10.4.1	Dorado	FAST	99.5
strpyo	R10.4.1	Dorado	HAC	99.51
strpyo	R10.4.1	Dorado	SUP	99.52
strpyo	R10.4.1	Rerio	SUP	99.5
strpyo	R10.4.1	Dorada-5kHz	SUP	99.37
