# Supplementary material for: Benchmarking Illumina and Oxford Nanopore Technologies (ONT) sequencing platforms for whole genome sequencing of bacterial genomes and use in clinical microbiology
Source: Research Square preprint supplement (doi:10.21203/rs.3.rs-7036422/v1), 2025-07-10
Supplement: Supplementary file 3 [file a2d99dbc222215fa224356d9.xlsx]

## Sheet: Read_me
Sheet	Description
Sheet 2	Acinetobacter baumanniii - blaOXA23
Sheet 3	Acinetobacter baumanniii - blaOXA23
Sheet 4	Acinetobacter pitti - blaOXA500
Sheet 5	Enterococcous faecium - vanA
Sheet 6	Escherichia coli - blaCTX-M-15
Sheet 7	Pseudomonas aeruginosa - blaVIM2
Sheet 8	Staphylococcous aureus - mecA
Headers	Description
Contig_ID	Contig header
Start	Start position of the identified gene
Stop	Stop position of the identified gene
Gene	Identified gene
Coverage_pct	Gene length coverage percentage
Identity_pct	Sequence identity percentage
Molecule_type	Plasmid/chromosome
Sample	Sample identifier

## Sheet: acibau_rn
Contig_ID	Start	Stop	Gene	Coverage_pct	Identity_pct	Molecule_type	Sample
75_pilon	1587	2405	blaOXA-23	100	100	plasmid	NARA308-r-illumina
1	3883174	3883992	blaOXA-23	100	100	not_found	NARA308-r-lrp-R10-Dorado-FAST
1	4018186	4019004	blaOXA-23	100	100	not_found	NARA308-r-lrp-R10-Dorado-FAST
1	3881965	3882783	blaOXA-23	100	100	not_found	NARA308-r-lrp-R10-Dorado-HAC
1	4016977	4017795	blaOXA-23	100	100	not_found	NARA308-r-lrp-R10-Dorado-HAC
1	3881965	3882783	blaOXA-23	100	100	not_found	NARA308-r-lrp-R10-Dorado-SUP
1	4016977	4017795	blaOXA-23	100	100	not_found	NARA308-r-lrp-R10-Dorado-SUP
1	3883368	3884186	blaOXA-23	100	100	not_found	NARA308-r-lrp-R10-Guppy-FAST
1	4018380	4019198	blaOXA-23	100	100	not_found	NARA308-r-lrp-R10-Guppy-FAST
1	3883174	3883992	blaOXA-23	100	100	not_found	NARA308-r-lrp-R10-Guppy-HAC
1	4018186	4019004	blaOXA-23	100	100	not_found	NARA308-r-lrp-R10-Guppy-HAC
1	3881965	3882783	blaOXA-23	100	100	not_found	NARA308-r-lrp-R10-Guppy-SUP
1	4016977	4017795	blaOXA-23	100	100	not_found	NARA308-r-lrp-R10-Guppy-SUP
1	3883174	3883992	blaOXA-23	100	100	not_found	NARA308-r-lrp-R10-Rerio-SUP
1	4018186	4019004	blaOXA-23	100	100	not_found	NARA308-r-lrp-R10-Rerio-SUP
1	2576789	2577607	blaOXA-23	100	100	not_found	NARA308-r-lrp-R9-Dorado-FAST
1	2711801	2712619	blaOXA-23	100	100	not_found	NARA308-r-lrp-R9-Dorado-FAST
1	2576789	2577607	blaOXA-23	100	100	not_found	NARA308-r-lrp-R9-Dorado-HAC
1	2711801	2712619	blaOXA-23	100	100	not_found	NARA308-r-lrp-R9-Dorado-HAC
1	2576789	2577607	blaOXA-23	100	100	not_found	NARA308-r-lrp-R9-Dorado-SUP
1	2711801	2712619	blaOXA-23	100	100	not_found	NARA308-r-lrp-R9-Dorado-SUP
1	2576789	2577607	blaOXA-23	100	100	not_found	NARA308-r-lrp-R9-Guppy-FAST
2	87120	87938	blaOXA-23	100	100	not_found	NARA308-r-lrp-R9-Guppy-FAST
1	2576789	2577607	blaOXA-23	100	100	not_found	NARA308-r-lrp-R9-Guppy-HAC
1	2711801	2712619	blaOXA-23	100	100	not_found	NARA308-r-lrp-R9-Guppy-HAC
1	2576789	2577607	blaOXA-23	100	100	not_found	NARA308-r-lrp-R9-Guppy-SUP
1	2711801	2712619	blaOXA-23	100	100	not_found	NARA308-r-lrp-R9-Guppy-SUP
contig_1	3446246	3447064	blaOXA-23	100	100	chromosome	NARA308-r-R10-Dorado-FAST
contig_1	2591106	2591924	blaOXA-23	100	100	chromosome	NARA308-r-R10-Dorado-HAC-flye
contig_1	2726117	2726935	blaOXA-23	100	100	chromosome	NARA308-r-R10-Dorado-HAC-flye
contig_1	923496	924314	blaOXA-23	100	100	chromosome	NARA308-r-R10-Dorado-HAC-Medaka-2.0
contig_1	1058508	1059326	blaOXA-23	100	100	chromosome	NARA308-r-R10-Dorado-HAC-Medaka-2.0
contig_1	923496	924314	blaOXA-23	100	100	chromosome	NARA308-r-R10-Dorado-HAC
contig_1	1058508	1059326	blaOXA-23	100	100	chromosome	NARA308-r-R10-Dorado-HAC
contig_1	923494	924312	blaOXA-23	100	100	chromosome	NARA308-r-R10-Dorado-SUP-flye
contig_1	1058506	1059324	blaOXA-23	100	100	chromosome	NARA308-r-R10-Dorado-SUP-flye
contig_1	923497	924315	blaOXA-23	100	100	chromosome	NARA308-r-R10-Dorado-SUP-Medaka-2.0
contig_1	1058509	1059327	blaOXA-23	100	100	chromosome	NARA308-r-R10-Dorado-SUP-Medaka-2.0
contig_1	923497	924315	blaOXA-23	100	100	chromosome	NARA308-r-R10-Dorado-SUP
contig_1	1058509	1059327	blaOXA-23	100	100	chromosome	NARA308-r-R10-Dorado-SUP
contig_2	2590415	2591233	blaOXA-23	100	100	chromosome	NARA308-r-R10-Guppy-FAST-flye
contig_2	2590302	2591120	blaOXA-23	100	100	chromosome	NARA308-r-R10-Guppy-FAST-Medaka-2.0
contig_2	2590952	2591770	blaOXA-23	100	100	chromosome	NARA308-r-R10-Guppy-FAST
contig_1	86478	87296	blaOXA-23	100	100	chromosome	NARA308-r-R10-Guppy-HAC-flye
contig_1	221489	222307	blaOXA-23	100	100	chromosome	NARA308-r-R10-Guppy-HAC-flye
contig_1	86478	87296	blaOXA-23	100	100	chromosome	NARA308-r-R10-Guppy-HAC-Medaka-2.0
contig_1	221490	222308	blaOXA-23	100	100	chromosome	NARA308-r-R10-Guppy-HAC-Medaka-2.0
contig_1	86478	87296	blaOXA-23	100	100	chromosome	NARA308-r-R10-Guppy-HAC
contig_1	221490	222308	blaOXA-23	100	100	chromosome	NARA308-r-R10-Guppy-HAC
contig_1	3311907	3312725	blaOXA-23	100	100	chromosome	NARA308-r-R10-Guppy-SUP-flye
contig_1	3446919	3447737	blaOXA-23	100	100	chromosome	NARA308-r-R10-Guppy-SUP-flye
contig_1	3311911	3312729	blaOXA-23	100	100	chromosome	NARA308-r-R10-Guppy-SUP-Medaka-2.0
contig_1	3446923	3447741	blaOXA-23	100	100	chromosome	NARA308-r-R10-Guppy-SUP-Medaka-2.0
contig_1	3311908	3312726	blaOXA-23	100	100	chromosome	NARA308-r-R10-Guppy-SUP
contig_1	3446920	3447738	blaOXA-23	100	100	chromosome	NARA308-r-R10-Guppy-SUP
contig_1	2591117	2591935	blaOXA-23	100	100	chromosome	NARA308-r-R10-Rerio-SUP
contig_1	2726129	2726947	blaOXA-23	100	100	chromosome	NARA308-r-R10-Rerio-SUP
contig_1	1468987	1469805	blaOXA-23	100	100	chromosome	NARA308-r-R9-Dorado-FAST-flye
contig_1	1603919	1604737	blaOXA-23	100	100	chromosome	NARA308-r-R9-Dorado-FAST-flye
contig_2	49	867	blaOXA-23	100	100	plasmid	NARA308-r-R9-Dorado-FAST-flye
contig_1	1469919	1470737	blaOXA-23	100	100	chromosome	NARA308-r-R9-Dorado-FAST
contig_1	1604936	1605754	blaOXA-23	100	100	chromosome	NARA308-r-R9-Dorado-FAST
contig_2	49	867	blaOXA-23	100	100	plasmid	NARA308-r-R9-Dorado-FAST
contig_2	1604499	1605317	blaOXA-23	100	100	chromosome	NARA308-r-R9-Dorado-HAC-flye
contig_9	1607	2425	blaOXA-23	100	100	plasmid	NARA308-r-R9-Dorado-HAC-flye
contig_1	1469947	1470765	blaOXA-23	100	100	chromosome	NARA308-r-R9-Dorado-HAC
contig_1	1604962	1605780	blaOXA-23	100	100	chromosome	NARA308-r-R9-Dorado-HAC
contig_2	49	867	blaOXA-23	100	100	plasmid	NARA308-r-R9-Dorado-HAC
contig_2	894162	894980	blaOXA-23	100	100	chromosome	NARA308-r-R9-Dorado-SUP-flye
contig_2	1029165	1029983	blaOXA-23	100	100	chromosome	NARA308-r-R9-Dorado-SUP-flye
contig_3	1607	2425	blaOXA-23	100	100	plasmid	NARA308-r-R9-Dorado-SUP-flye
contig_1	1469755	1470573	blaOXA-23	100	100	chromosome	NARA308-r-R9-Dorado-SUP
contig_1	1604756	1605574	blaOXA-23	100	100	chromosome	NARA308-r-R9-Dorado-SUP
contig_2	49	867	blaOXA-23	100	100	plasmid	NARA308-r-R9-Dorado-SUP
contig_3	732262	733080	blaOXA-23	100	100	chromosome	NARA308-r-R9-Guppy-FAST-flye
contig_3	867173	867991	blaOXA-23	100	100	chromosome	NARA308-r-R9-Guppy-FAST-flye
contig_9	1607	2425	blaOXA-23	100	100	plasmid	NARA308-r-R9-Guppy-FAST-flye
contig_3	732927	733745	blaOXA-23	100	100	chromosome	NARA308-r-R9-Guppy-FAST
contig_3	867936	868754	blaOXA-23	100	100	chromosome	NARA308-r-R9-Guppy-FAST
contig_3	858084	858902	blaOXA-23	100	100	chromosome	NARA308-r-R9-Guppy-HAC-flye
contig_3	993079	993897	blaOXA-23	100	100	chromosome	NARA308-r-R9-Guppy-HAC-flye
contig_8	1607	2425	blaOXA-23	100	100	plasmid	NARA308-r-R9-Guppy-HAC-flye
contig_3	858291	859109	blaOXA-23	100	100	chromosome	NARA308-r-R9-Guppy-HAC
contig_3	993302	994120	blaOXA-23	100	100	chromosome	NARA308-r-R9-Guppy-HAC
contig_13	1607	2425	blaOXA-23	100	100	plasmid	NARA308-r-R9-Guppy-SUP-flye
contig_9	856948	857766	blaOXA-23	100	100	chromosome	NARA308-r-R9-Guppy-SUP-flye
contig_9	991951	992769	blaOXA-23	100	100	chromosome	NARA308-r-R9-Guppy-SUP-flye
contig_9	857049	857867	blaOXA-23	100	100	chromosome	NARA308-r-R9-Guppy-SUP
contig_9	992059	992877	blaOXA-23	100	100	chromosome	NARA308-r-R9-Guppy-SUP
contig_1_polypolish	3311380	3312198	blaOXA-23	100	100	chromosome	NARA308-r-srp-R10-Dorado-FAST
contig_1_polypolish	3446391	3447209	blaOXA-23	100	100	chromosome	NARA308-r-srp-R10-Dorado-FAST
contig_1_polypolish	923497	924315	blaOXA-23	100	100	chromosome	NARA308-r-srp-R10-Dorado-HAC
contig_1_polypolish	1058509	1059327	blaOXA-23	100	100	chromosome	NARA308-r-srp-R10-Dorado-HAC
contig_1_polypolish	923497	924315	blaOXA-23	100	100	chromosome	NARA308-r-srp-R10-Dorado-SUP
contig_1_polypolish	1058509	1059327	blaOXA-23	100	100	chromosome	NARA308-r-srp-R10-Dorado-SUP
contig_2_polypolish	2591112	2591930	blaOXA-23	100	100	chromosome	NARA308-r-srp-R10-Guppy-FAST
contig_2_polypolish	2726124	2726942	blaOXA-23	100	100	chromosome	NARA308-r-srp-R10-Guppy-FAST
contig_1_polypolish	86480	87298	blaOXA-23	100	100	chromosome	NARA308-r-srp-R10-Guppy-HAC
contig_1_polypolish	221492	222310	blaOXA-23	100	100	chromosome	NARA308-r-srp-R10-Guppy-HAC
contig_1_polypolish	3311910	3312728	blaOXA-23	100	100	chromosome	NARA308-r-srp-R10-Guppy-SUP
contig_1_polypolish	3446922	3447740	blaOXA-23	100	100	chromosome	NARA308-r-srp-R10-Guppy-SUP
contig_1_polypolish	2591118	2591936	blaOXA-23	100	100	chromosome	NARA308-r-srp-R10-Rerio-SUP
contig_1_polypolish	2726130	2726948	blaOXA-23	100	100	chromosome	NARA308-r-srp-R10-Rerio-SUP
contig_1_polypolish	1469927	1470745	blaOXA-23	100	100	chromosome	NARA308-r-srp-R9-Dorado-FAST
contig_1_polypolish	1604939	1605757	blaOXA-23	100	100	chromosome	NARA308-r-srp-R9-Dorado-FAST
contig_2_polypolish	49	867	blaOXA-23	100	100	plasmid	NARA308-r-srp-R9-Dorado-FAST
contig_1_polypolish	1469923	1470741	blaOXA-23	100	100	chromosome	NARA308-r-srp-R9-Dorado-HAC
contig_1_polypolish	1604934	1605752	blaOXA-23	100	100	chromosome	NARA308-r-srp-R9-Dorado-HAC
contig_2_polypolish	49	867	blaOXA-23	100	100	plasmid	NARA308-r-srp-R9-Dorado-HAC
contig_1_polypolish	1469925	1470743	blaOXA-23	100	100	chromosome	NARA308-r-srp-R9-Dorado-SUP
contig_1_polypolish	1604936	1605754	blaOXA-23	100	100	chromosome	NARA308-r-srp-R9-Dorado-SUP
contig_2_polypolish	49	867	blaOXA-23	100	100	plasmid	NARA308-r-srp-R9-Dorado-SUP
contig_3_polypolish	732941	733759	blaOXA-23	100	100	chromosome	NARA308-r-srp-R9-Guppy-FAST
contig_3_polypolish	867953	868771	blaOXA-23	100	100	chromosome	NARA308-r-srp-R9-Guppy-FAST
contig_3_polypolish	858287	859105	blaOXA-23	100	100	chromosome	NARA308-r-srp-R9-Guppy-HAC
contig_3_polypolish	993298	994116	blaOXA-23	100	100	chromosome	NARA308-r-srp-R9-Guppy-HAC
contig_13_polypolish	1607	2425	blaOXA-23	100	100	plasmid	NARA308-r-srp-R9-Guppy-SUP
contig_9_polypolish	857059	857877	blaOXA-23	100	100	chromosome	NARA308-r-srp-R9-Guppy-SUP
contig_9_polypolish	992070	992888	blaOXA-23	100	100	chromosome	NARA308-r-srp-R9-Guppy-SUP

## Sheet: acibau_r
Contig_ID	Start	Stop	Gene	Coverage_pct	Identity_pct	Molecule_type	Sample
55_pilon	1593	2411	blaOXA-23	100	100	plasmid	502578-21-r-illumina
1	150800	151618	blaOXA-23	100	100	not_found	502578-21-r-lrp-R10-Dorado-FAST
1	2735801	2736619	blaOXA-23	100	100	not_found	502578-21-r-lrp-R10-Dorado-FAST
1	150800	151618	blaOXA-23	100	100	not_found	502578-21-r-lrp-R10-Dorado-HAC
1	2735801	2736619	blaOXA-23	100	100	not_found	502578-21-r-lrp-R10-Dorado-HAC
1	150800	151618	blaOXA-23	100	100	not_found	502578-21-r-lrp-R10-Dorado-SUP
1	2735801	2736619	blaOXA-23	100	100	not_found	502578-21-r-lrp-R10-Dorado-SUP
1	150800	151618	blaOXA-23	100	100	not_found	502578-21-r-lrp-R10-Guppy-FAST
1	2735801	2736619	blaOXA-23	100	100	not_found	502578-21-r-lrp-R10-Guppy-FAST
1	150800	151618	blaOXA-23	100	100	not_found	502578-21-r-lrp-R10-Guppy-HAC
1	2735801	2736619	blaOXA-23	100	100	not_found	502578-21-r-lrp-R10-Guppy-HAC
1	150800	151618	blaOXA-23	100	100	not_found	502578-21-r-lrp-R10-Guppy-SUP
1	2735801	2736619	blaOXA-23	100	100	not_found	502578-21-r-lrp-R10-Guppy-SUP
1	150800	151618	blaOXA-23	100	100	not_found	502578-21-r-lrp-R10-Rerio-SUP
1	2735801	2736619	blaOXA-23	100	100	not_found	502578-21-r-lrp-R10-Rerio-SUP
1	1488110	1488928	blaOXA-23	100	100	not_found	502578-21-r-lrp-R9-Dorado-FAST
1	1488114	1488932	blaOXA-23	100	100	not_found	502578-21-r-lrp-R9-Dorado-HAC
1	1488114	1488932	blaOXA-23	100	100	not_found	502578-21-r-lrp-R9-Dorado-SUP
1	1488105	1488923	blaOXA-23	100	100	not_found	502578-21-r-lrp-R9-Guppy-FAST
1	1488105	1488923	blaOXA-23	100	100	not_found	502578-21-r-lrp-R9-Guppy-HAC
1	1488105	1488923	blaOXA-23	100	100	not_found	502578-21-r-lrp-R9-Guppy-SUP
contig_2	128629	129447	blaOXA-23	100	100	chromosome	502578-21-r-R10-Dorado-FAST
contig_2	1619883	1620701	blaOXA-23	100	100	chromosome	502578-21-r-R10-Dorado-FAST
contig_2	128535	129353	blaOXA-23	100	100	chromosome	502578-21-r-R10-Dorado-FAST-Medaka-2.0
contig_1	2213074	2213892	blaOXA-23	100	100	chromosome	502578-21-r-R10-Dorado-HAC
contig_1	3704778	3705596	blaOXA-23	100	100	chromosome	502578-21-r-R10-Dorado-HAC
contig_1	2212634	2213452	blaOXA-23	100	100	chromosome	502578-21-r-R10-Dorado-HAC-flye
contig_1	3704302	3705120	blaOXA-23	100	100	chromosome	502578-21-r-R10-Dorado-HAC-flye
contig_1	2213006	2213824	blaOXA-23	100	100	chromosome	502578-21-r-R10-Dorado-HAC-Medaka-2.0
contig_1	3704701	3705519	blaOXA-23	100	100	chromosome	502578-21-r-R10-Dorado-HAC-Medaka-2.0
contig_1	2213127	2213945	blaOXA-23	100	100	chromosome	502578-21-r-R10-Dorado-SUP
contig_1	3704828	3705646	blaOXA-23	100	100	chromosome	502578-21-r-R10-Dorado-SUP
contig_1	2212885	2213703	blaOXA-23	100	100	chromosome	502578-21-r-R10-Dorado-SUP-flye
contig_1	3704597	3705415	blaOXA-23	100	100	chromosome	502578-21-r-R10-Dorado-SUP-flye
contig_1	2213211	2214029	blaOXA-23	100	100	chromosome	502578-21-r-R10-Dorado-SUP-Medaka-2.0
contig_1	3704910	3705728	blaOXA-23	100	100	chromosome	502578-21-r-R10-Dorado-SUP-Medaka-2.0
contig_2	2164158	2164976	blaOXA-23	100	100	chromosome	502578-21-r-R10-Guppy-FAST
contig_2	2162530	2163348	blaOXA-23	100	100	chromosome	502578-21-r-R10-Guppy-FAST-flye
contig_2	2162219	2163037	blaOXA-23	100	100	chromosome	502578-21-r-R10-Guppy-FAST-Medaka-2.0
contig_1	2385704	2386522	blaOXA-23	100	100	chromosome	502578-21-r-R10-Guppy-HAC
contig_1	3877398	3878216	blaOXA-23	100	100	chromosome	502578-21-r-R10-Guppy-HAC
contig_1	2385683	2386501	blaOXA-23	100	100	chromosome	502578-21-r-R10-Guppy-HAC-flye
contig_1	3877365	3878183	blaOXA-23	100	100	chromosome	502578-21-r-R10-Guppy-HAC-flye
contig_1	2385701	2386519	blaOXA-23	100	100	chromosome	502578-21-r-R10-Guppy-HAC-Medaka-2.0
contig_1	3877394	3878212	blaOXA-23	100	100	chromosome	502578-21-r-R10-Guppy-HAC-Medaka-2.0
contig_1	220602	221420	blaOXA-23	100	100	chromosome	502578-21-r-R10-Guppy-SUP
contig_1	1712303	1713121	blaOXA-23	100	100	chromosome	502578-21-r-R10-Guppy-SUP
contig_1	219756	220574	blaOXA-23	100	100	chromosome	502578-21-r-R10-Guppy-SUP-flye
contig_1	1711455	1712273	blaOXA-23	100	100	chromosome	502578-21-r-R10-Guppy-SUP-flye
contig_1	220564	221382	blaOXA-23	100	100	chromosome	502578-21-r-R10-Guppy-SUP-Medaka-2.0
contig_1	1712265	1713083	blaOXA-23	100	100	chromosome	502578-21-r-R10-Guppy-SUP-Medaka-2.0
contig_1	2403348	2404166	blaOXA-23	100	100	chromosome	502578-21-r-R10-Rerio-SUP
contig_1	3895047	3895865	blaOXA-23	100	100	chromosome	502578-21-r-R10-Rerio-SUP
contig_6	128453	129271	blaOXA-23	100	100	chromosome	502578-21-r-R9-Dorado-FAST
contig_6	128381	129199	blaOXA-23	100	100	chromosome	502578-21-r-R9-Dorado-FAST-flye
contig_3	131028	131846	blaOXA-23	100	100	chromosome	502578-21-r-R9-Dorado-HAC
contig_5	868819	869637	blaOXA-23	100	100	chromosome	502578-21-r-R9-Dorado-HAC
contig_3	104893	105711	blaOXA-23	100	100	chromosome	502578-21-r-R9-Dorado-HAC-flye
contig_6	172330	173148	blaOXA-23	100	100	chromosome	502578-21-r-R9-Dorado-HAC-flye
contig_3	131018	131836	blaOXA-23	100	100	chromosome	502578-21-r-R9-Dorado-SUP
contig_5	868753	869571	blaOXA-23	100	100	chromosome	502578-21-r-R9-Dorado-SUP
contig_3	131001	131819	blaOXA-23	100	100	chromosome	502578-21-r-R9-Dorado-SUP-flye
contig_5	868671	869489	blaOXA-23	100	100	chromosome	502578-21-r-R9-Dorado-SUP-flye
contig_9	1606	2424	blaOXA-23	100	100	chromosome	502578-21-r-R9-Guppy-FAST
contig_2	375969	376787	blaOXA-23	100	100	chromosome	502578-21-r-R9-Guppy-FAST-flye
contig_9	1606	2424	blaOXA-23	100	100	chromosome	502578-21-r-R9-Guppy-FAST-flye
contig_9	1608	2426	blaOXA-23	100	100	chromosome	502578-21-r-R9-Guppy-HAC
contig_1	130310	131128	blaOXA-23	100	100	chromosome	502578-21-r-R9-Guppy-HAC-flye
contig_6	172341	173159	blaOXA-23	100	100	chromosome	502578-21-r-R9-Guppy-HAC-flye
contig_9	1605	2423	blaOXA-23	100	100	chromosome	502578-21-r-R9-Guppy-SUP
contig_1	2118195	2119013	blaOXA-23	100	100	chromosome	502578-21-r-R9-Guppy-SUP-flye
contig_2	363238	364056	blaOXA-23	100	100	chromosome	502578-21-r-R9-Guppy-SUP-flye
contig_2_polypolish	128683	129501	blaOXA-23	100	100	chromosome	502578-21-r-srp-R10-Dorado-FAST
contig_2_polypolish	1620359	1621177	blaOXA-23	100	100	chromosome	502578-21-r-srp-R10-Dorado-FAST
contig_1_polypolish	2213079	2213897	blaOXA-23	100	100	chromosome	502578-21-r-srp-R10-Dorado-HAC
contig_1_polypolish	3704782	3705600	blaOXA-23	100	100	chromosome	502578-21-r-srp-R10-Dorado-HAC
contig_1_polypolish	2213140	2213958	blaOXA-23	100	100	chromosome	502578-21-r-srp-R10-Dorado-SUP
contig_1_polypolish	3704843	3705661	blaOXA-23	100	100	chromosome	502578-21-r-srp-R10-Dorado-SUP
contig_2_polypolish	2165041	2165859	blaOXA-23	100	100	chromosome	502578-21-r-srp-R10-Guppy-FAST
contig_2_polypolish	3641349	3642167	blaOXA-23	100	100	chromosome	502578-21-r-srp-R10-Guppy-FAST
contig_1_polypolish	2385713	2386531	blaOXA-23	100	100	chromosome	502578-21-r-srp-R10-Guppy-HAC
contig_1_polypolish	3877416	3878234	blaOXA-23	100	100	chromosome	502578-21-r-srp-R10-Guppy-HAC
contig_1_polypolish	220594	221412	blaOXA-23	100	100	chromosome	502578-21-r-srp-R10-Guppy-SUP
contig_1_polypolish	1712297	1713115	blaOXA-23	100	100	chromosome	502578-21-r-srp-R10-Guppy-SUP
contig_1_polypolish	2403331	2404149	blaOXA-23	100	100	chromosome	502578-21-r-srp-R10-Rerio-SUP
contig_1_polypolish	3895034	3895852	blaOXA-23	100	100	chromosome	502578-21-r-srp-R10-Rerio-SUP
contig_5_polypolish	376204	377022	blaOXA-23	100	100	chromosome	502578-21-r-srp-R9-Dorado-FAST
contig_6_polypolish	128465	129283	blaOXA-23	100	100	chromosome	502578-21-r-srp-R9-Dorado-FAST
contig_3_polypolish	131023	131841	blaOXA-23	100	100	chromosome	502578-21-r-srp-R9-Dorado-HAC
contig_5_polypolish	868792	869610	blaOXA-23	100	100	chromosome	502578-21-r-srp-R9-Dorado-HAC
contig_3_polypolish	131023	131841	blaOXA-23	100	100	chromosome	502578-21-r-srp-R9-Dorado-SUP
contig_5_polypolish	868792	869610	blaOXA-23	100	100	chromosome	502578-21-r-srp-R9-Dorado-SUP
contig_2_polypolish	376213	377031	blaOXA-23	100	100	chromosome	502578-21-r-srp-R9-Guppy-FAST
contig_9_polypolish	1607	2425	blaOXA-23	100	100	chromosome	502578-21-r-srp-R9-Guppy-FAST
contig_2_polypolish	376211	377029	blaOXA-23	100	100	chromosome	502578-21-r-srp-R9-Guppy-HAC
contig_9_polypolish	1608	2426	blaOXA-23	100	100	chromosome	502578-21-r-srp-R9-Guppy-HAC
contig_2_polypolish	376212	377030	blaOXA-23	100	100	chromosome	502578-21-r-srp-R9-Guppy-SUP
contig_9_polypolish	1607	2425	blaOXA-23	100	100	chromosome	502578-21-r-srp-R9-Guppy-SUP

## Sheet: acipit
Contig_ID	Start	Stop	Gene	Coverage_pct	Identity_pct	Molecule_type	Sample
4_pilon	6735	7553	blaOXA-500	100	100	chromosome	500441-22-s-illumina
1	2188113	2188931	blaOXA-500	100	100	not_found	500441-22-s-lrp-R10-Dorado-FAST
1	2190104	2190922	blaOXA-500	100	100	not_found	500441-22-s-lrp-R10-Dorado-HAC
1	2190104	2190922	blaOXA-500	100	100	not_found	500441-22-s-lrp-R10-Dorado-SUP
1	2187086	2187904	blaOXA-500	100	100	not_found	500441-22-s-lrp-R10-Guppy-FAST
1	2188113	2188931	blaOXA-500	100	100	not_found	500441-22-s-lrp-R10-Guppy-HAC
1	2190104	2190922	blaOXA-500	100	100	not_found	500441-22-s-lrp-R10-Guppy-SUP
2	500648	501466	blaOXA-500	100	100	not_found	500441-22-s-lrp-R10-Rerio-SUP
1	2190104	2190922	blaOXA-500	100	100	not_found	500441-22-s-lrp-R9-Dorado-FAST
1	2190104	2190922	blaOXA-500	100	100	not_found	500441-22-s-lrp-R9-Dorado-HAC
1	2190104	2190922	blaOXA-500	100	100	not_found	500441-22-s-lrp-R9-Dorado-SUP
1	2189432	2190250	blaOXA-500	100	100	not_found	500441-22-s-lrp-R9-Guppy-FAST
1	2190104	2190922	blaOXA-500	100	100	not_found	500441-22-s-lrp-R9-Guppy-HAC
1	2189851	2190669	blaOXA-500	100	100	not_found	500441-22-s-lrp-R9-Guppy-SUP
contig_1	3352624	3353442	blaOXA-500	100	100	chromosome	500441-22-s-R10-Dorado-FAST
contig_1	326446	327255	blaOXA-213	98.9	100	chromosome	500441-22-s-R10-Dorado-FAST-flye
contig_1	3351896	3352408	blaOXA-213	62.64	100	chromosome	500441-22-s-R10-Dorado-FAST-Medaka-2.0
contig_1	1634910	1635728	blaOXA-500	100	100	chromosome	500441-22-s-R10-Dorado-HAC
contig_6	326474	327292	blaOXA-500	100	100	chromosome	500441-22-s-R10-Dorado-HAC-flye
contig_1	1634908	1635726	blaOXA-500	100	100	chromosome	500441-22-s-R10-Dorado-HAC-Medaka-2.0
contig_1	966281	967099	blaOXA-500	100	100	chromosome	500441-22-s-R10-Dorado-SUP
contig_3	2709452	2710270	blaOXA-500	100	100	chromosome	500441-22-s-R10-Dorado-SUP-flye
contig_1	966282	967100	blaOXA-500	100	100	chromosome	500441-22-s-R10-Dorado-SUP-Medaka-2.0
contig_1	499811	500629	blaOXA-500	100	100	chromosome	500441-22-s-R10-Guppy-FAST
contig_2	312964	313782	blaOXA-500	100	100	chromosome	500441-22-s-R10-Guppy-FAST-flye
contig_1	499627	500445	blaOXA-500	100	100	chromosome	500441-22-s-R10-Guppy-FAST-Medaka-2.0
contig_1	3356843	3357661	blaOXA-500	100	100	chromosome	500441-22-s-R10-Guppy-HAC
contig_6	203073	203891	blaOXA-500	100	100	chromosome	500441-22-s-R10-Guppy-HAC-flye
contig_1	3356834	3357652	blaOXA-500	100	100	chromosome	500441-22-s-R10-Guppy-HAC-Medaka-2.0
contig_1	1634907	1635725	blaOXA-500	100	100	chromosome	500441-22-s-R10-Guppy-SUP
contig_5	205706	206524	blaOXA-500	100	100	chromosome	500441-22-s-R10-Guppy-SUP-flye
contig_1	1634907	1635725	blaOXA-500	100	100	chromosome	500441-22-s-R10-Guppy-SUP-Medaka-2.0
contig_1	1634910	1635728	blaOXA-500	100	100	chromosome	500441-22-s-R10-Rerio-SUP
contig_1	3603656	3604474	blaOXA-500	100	100	chromosome	500441-22-s-R9-Dorado-FAST
contig_1	3603509	3604327	blaOXA-500	100	100	chromosome	500441-22-s-R9-Dorado-HAC
contig_31	6461	7078	blaOXA-213	75.46	100	chromosome	500441-22-s-R9-Dorado-HAC-flye
contig_1	257682	258500	blaOXA-500	100	100	chromosome	500441-22-s-R9-Dorado-SUP
contig_19	20540	21157	blaOXA-213	75.46	100	chromosome	500441-22-s-R9-Dorado-SUP-flye
contig_1	3171908	3172726	blaOXA-500	100	100	chromosome	500441-22-s-R9-Guppy-FAST
contig_3	2256070	2256888	blaOXA-500	100	100	chromosome	500441-22-s-R9-Guppy-HAC
contig_52	6640	7278	blaOXA-213	78.02	97.18	chromosome	500441-22-s-R9-Guppy-HAC-flye
contig_4	705689	706507	blaOXA-500	100	100	chromosome	500441-22-s-R9-Guppy-SUP
contig_45	6435	7253	blaOXA-500	100	100	chromosome	500441-22-s-R9-Guppy-SUP-flye
contig_1_polypolish	3352944	3353762	blaOXA-500	100	100	chromosome	500441-22-s-srp-R10-Dorado-FAST
contig_1_polypolish	1634910	1635728	blaOXA-500	100	100	chromosome	500441-22-s-srp-R10-Dorado-HAC
contig_1_polypolish	966282	967100	blaOXA-500	100	100	chromosome	500441-22-s-srp-R10-Dorado-SUP
contig_1_polypolish	499907	500725	blaOXA-500	100	100	chromosome	500441-22-s-srp-R10-Guppy-FAST
contig_1_polypolish	3356839	3357657	blaOXA-500	100	100	chromosome	500441-22-s-srp-R10-Guppy-HAC
contig_1_polypolish	1634907	1635725	blaOXA-500	100	100	chromosome	500441-22-s-srp-R10-Guppy-SUP
contig_1_polypolish	1634910	1635728	blaOXA-500	100	100	chromosome	500441-22-s-srp-R10-Rerio-SUP
contig_1_polypolish	3603491	3604309	blaOXA-500	100	100	chromosome	500441-22-s-srp-R9-Dorado-FAST
contig_1_polypolish	3603485	3604303	blaOXA-500	100	100	chromosome	500441-22-s-srp-R9-Dorado-HAC
contig_1_polypolish	257686	258504	blaOXA-500	100	100	chromosome	500441-22-s-srp-R9-Dorado-SUP
contig_1_polypolish	3171721	3172539	blaOXA-500	100	100	chromosome	500441-22-s-srp-R9-Guppy-FAST
contig_3_polypolish	2256047	2256865	blaOXA-500	100	100	chromosome	500441-22-s-srp-R9-Guppy-HAC
contig_4_polypolish	705688	706506	blaOXA-500	100	100	chromosome	500441-22-s-srp-R9-Guppy-SUP

## Sheet: entfae
Contig_ID	Start	Stop	Gene	Coverage_pct	Identity_pct	Molecule_type	Sample
90_pilon	1251	2279	vanA	100	99.71	plasmid	803393-22-r-illumina
5	1251	2279	vanA	100	99.71	not_found	803393-22-r-lrp-R10-Dorado-FAST
5	1251	2279	vanA	100	99.71	not_found	803393-22-r-lrp-R10-Dorado-HAC
5	1251	2279	vanA	100	99.71	not_found	803393-22-r-lrp-R10-Dorado-SUP
5	1251	2279	vanA	100	99.71	not_found	803393-22-r-lrp-R10-Guppy-FAST
5	1251	2279	vanA	100	99.71	not_found	803393-22-r-lrp-R10-Guppy-HAC
5	1251	2279	vanA	100	99.71	not_found	803393-22-r-lrp-R10-Guppy-SUP
6	1251	2279	vanA	100	99.71	not_found	803393-22-r-lrp-R10-Rerio-SUP
7	1251	2279	vanA	100	99.71	not_found	803393-22-r-lrp-R9-Dorado-FAST
7	1251	2279	vanA	100	99.71	not_found	803393-22-r-lrp-R9-Dorado-HAC
7	1251	2279	vanA	100	99.71	not_found	803393-22-r-lrp-R9-Dorado-SUP
7	1251	2279	vanA	100	99.71	not_found	803393-22-r-lrp-R9-Guppy-FAST
8	1251	2279	vanA	100	99.71	not_found	803393-22-r-lrp-R9-Guppy-HAC
7	1251	2279	vanA	100	99.71	not_found	803393-22-r-lrp-R9-Guppy-SUP
contig_19	23305	24333	vanA	100	99.71	plasmid	803393-22-r-R10-Dorado-FAST
contig_10	11404	12432	vanA	100	99.71	plasmid	803393-22-r-R10-Dorado-HAC-flye
contig_13	11404	12432	vanA	100	99.71	plasmid	803393-22-r-R10-Dorado-HAC-Medaka-2.0
contig_13	11404	12432	vanA	100	99.71	plasmid	803393-22-r-R10-Dorado-HAC
contig_13	11404	12432	vanA	100	99.71	plasmid	803393-22-r-R10-Dorado-SUP-flye
contig_13	11404	12432	vanA	100	99.71	plasmid	803393-22-r-R10-Dorado-SUP-Medaka-2.0
contig_13	11404	12432	vanA	100	99.71	plasmid	803393-22-r-R10-Dorado-SUP
contig_19	30005	31033	vanA	100	99.71	plasmid	803393-22-r-R10-Guppy-FAST
contig_17	23304	24332	vanA	100	99.71	plasmid	803393-22-r-R10-Guppy-HAC-flye
contig_17	23304	24332	vanA	100	99.71	plasmid	803393-22-r-R10-Guppy-HAC-Medaka-2.0
contig_17	23304	24332	vanA	100	99.71	plasmid	803393-22-r-R10-Guppy-HAC
contig_17	23305	24333	vanA	100	99.71	plasmid	803393-22-r-R10-Guppy-SUP-flye
contig_17	23305	24333	vanA	100	99.71	plasmid	803393-22-r-R10-Guppy-SUP-Medaka-2.0
contig_17	23305	24333	vanA	100	99.71	plasmid	803393-22-r-R10-Guppy-SUP
contig_15	11404	12432	vanA	100	99.71	plasmid	803393-22-r-R10-Rerio-SUP
contig_12	20010	21038	vanA	100	99.71	plasmid	803393-22-r-R9-Dorado-FAST
contig_53	5862	6704	vanA	81.92	98.93	plasmid	803393-22-r-R9-Dorado-HAC-flye
contig_12	20015	21043	vanA	100	99.71	plasmid	803393-22-r-R9-Dorado-HAC
contig_39	1252	2094	vanA	81.92	98.93	plasmid	803393-22-r-R9-Dorado-SUP-flye
contig_39	1252	2280	vanA	100	99.71	plasmid	803393-22-r-R9-Dorado-SUP
contig_19	20006	21034	vanA	100	99.71	plasmid	803393-22-r-R9-Guppy-FAST
contig_55	1252	2094	vanA	81.92	98.93	plasmid	803393-22-r-R9-Guppy-HAC-flye
contig_55	1252	2280	vanA	100	99.71	plasmid	803393-22-r-R9-Guppy-HAC
contig_37	5864	6706	vanA	81.92	98.93	plasmid	803393-22-r-R9-Guppy-SUP-flye
contig_37	5683	6711	vanA	100	99.71	plasmid	803393-22-r-R9-Guppy-SUP
contig_19_polypolish	23307	24335	vanA	100	99.71	plasmid	803393-22-r-srp-R10-Dorado-FAST
contig_13_polypolish	11404	12432	vanA	100	99.71	plasmid	803393-22-r-srp-R10-Dorado-HAC
contig_13_polypolish	11404	12432	vanA	100	99.71	plasmid	803393-22-r-srp-R10-Dorado-SUP
contig_19_polypolish	30005	31033	vanA	100	99.71	plasmid	803393-22-r-srp-R10-Guppy-FAST
contig_17_polypolish	23304	24332	vanA	100	99.71	plasmid	803393-22-r-srp-R10-Guppy-HAC
contig_17_polypolish	23305	24333	vanA	100	99.71	plasmid	803393-22-r-srp-R10-Guppy-SUP
contig_15_polypolish	11404	12432	vanA	100	99.71	plasmid	803393-22-r-srp-R10-Rerio-SUP
contig_12_polypolish	20010	21038	vanA	100	99.71	plasmid	803393-22-r-srp-R9-Dorado-FAST
contig_12_polypolish	20013	21041	vanA	100	99.71	plasmid	803393-22-r-srp-R9-Dorado-HAC
contig_39_polypolish	1252	2280	vanA	100	99.71	plasmid	803393-22-r-srp-R9-Dorado-SUP
contig_19_polypolish	20009	21037	vanA	100	99.71	plasmid	803393-22-r-srp-R9-Guppy-FAST
contig_55_polypolish	1252	2280	vanA	100	99.71	plasmid	803393-22-r-srp-R9-Guppy-HAC
contig_37_polypolish	5683	6711	vanA	100	99.71	plasmid	803393-22-r-srp-R9-Guppy-SUP
contig_19	2820	3971	vanS-A	100	100	plasmid	803393-22-r-R10-Guppy-FAST
contig_19	3952	4644	vanR-A	100	100	plasmid	803393-22-r-R10-Guppy-FAST
contig_19	27414	27896	vanZ-A	100	100	plasmid	803393-22-r-R10-Guppy-FAST
contig_19	28052	28960	vanY-A	100	99.67	plasmid	803393-22-r-R10-Guppy-FAST
contig_19	29391	29996	vanX-A	100	100	plasmid	803393-22-r-R10-Guppy-FAST
contig_19	31029	31994	vanH-A	100	100	plasmid	803393-22-r-R10-Guppy-FAST
contig_19	13955	14647	vanR-A	100	100	plasmid	803393-22-r-R9-Guppy-FAST
contig_19	14628	15779	vanS-A	100	100	plasmid	803393-22-r-R9-Guppy-FAST
contig_19	19045	20010	vanH-A	100	100	plasmid	803393-22-r-R9-Guppy-FAST
contig_19	21043	21648	vanX-A	100	100	plasmid	803393-22-r-R9-Guppy-FAST
contig_19	22079	22987	vanY-A	100	99.67	plasmid	803393-22-r-R9-Guppy-FAST
contig_19	23143	23625	vanZ-A	100	100	plasmid	803393-22-r-R9-Guppy-FAST
contig_12	13936	14298	vanR-A	52.38	100	plasmid	803393-22-r-R9-Dorado-FAST-flye
contig_12	14623	15756	vanS-A	98.7	92.08	plasmid	803393-22-r-R9-Dorado-FAST-flye
contig_12	19017	19982	vanH-A	100	100	plasmid	803393-22-r-R9-Dorado-FAST-flye
contig_12	21012	21617	vanX-A	100	100	plasmid	803393-22-r-R9-Dorado-FAST-flye
contig_12	22050	22955	vanY-A	99.67	98.34	plasmid	803393-22-r-R9-Dorado-FAST-flye
contig_12	23111	23506	vanZ-A	81.99	100	plasmid	803393-22-r-R9-Dorado-FAST-flye
contig_19	3070	3969	vanS-A	78.12	100	plasmid	803393-22-r-R10-Guppy-FAST-flye
contig_19	3952	4641	vanR-A	99.57	97.83	plasmid	803393-22-r-R10-Guppy-FAST-flye
contig_19	27385	27867	vanZ-A	100	100	plasmid	803393-22-r-R10-Guppy-FAST-flye
contig_19	28049	28930	vanY-A	97.03	99.66	plasmid	803393-22-r-R10-Guppy-FAST-flye
contig_19	29361	29948	vanX-A	97.03	98.98	plasmid	803393-22-r-R10-Guppy-FAST-flye
contig_19	30994	31959	vanH-A	100	100	plasmid	803393-22-r-R10-Guppy-FAST-flye
contig_19	2818	3969	vanS-A	100	100	plasmid	803393-22-r-R10-Guppy-FAST-Medaka-2.0
contig_19	3950	4642	vanR-A	100	100	plasmid	803393-22-r-R10-Guppy-FAST-Medaka-2.0
contig_19	27398	27880	vanZ-A	100	100	plasmid	803393-22-r-R10-Guppy-FAST-Medaka-2.0
contig_19	28331	28942	vanY-A	67.33	100	plasmid	803393-22-r-R10-Guppy-FAST-Medaka-2.0
contig_19	29373	29978	vanX-A	100	100	plasmid	803393-22-r-R10-Guppy-FAST-Medaka-2.0
contig_19	31008	31973	vanH-A	100	99.69	plasmid	803393-22-r-R10-Guppy-FAST-Medaka-2.0
contig_19	17242	17931	vanR-A	99.57	97.83	plasmid	803393-22-r-R10-Dorado-FAST-flye
contig_19	17914	18690	vanS-A	67.45	100	plasmid	803393-22-r-R10-Dorado-FAST-flye
contig_19	22328	23293	vanH-A	100	100	plasmid	803393-22-r-R10-Dorado-FAST-flye
contig_19	24340	24924	vanX-A	96.53	98.97	plasmid	803393-22-r-R10-Dorado-FAST-flye
contig_19	25355	26050	vanY-A	76.57	99.57	plasmid	803393-22-r-R10-Dorado-FAST-flye
contig_19	26418	26900	vanZ-A	100	100	plasmid	803393-22-r-R10-Dorado-FAST-flye
contig_19	17254	17946	vanR-A	100	100	plasmid	803393-22-r-R10-Dorado-FAST
contig_19	17927	19078	vanS-A	100	100	plasmid	803393-22-r-R10-Dorado-FAST
contig_19	22344	23309	vanH-A	100	100	plasmid	803393-22-r-R10-Dorado-FAST
contig_19	24342	24947	vanX-A	100	100	plasmid	803393-22-r-R10-Dorado-FAST
contig_19	25378	26286	vanY-A	100	99.67	plasmid	803393-22-r-R10-Dorado-FAST
contig_19	26442	26924	vanZ-A	100	100	plasmid	803393-22-r-R10-Dorado-FAST
contig_19	13935	14297	vanR-A	52.38	100	plasmid	803393-22-r-R9-Guppy-FAST-flye
contig_19	15000	15755	vanS-A	65.62	92.86	plasmid	803393-22-r-R9-Guppy-FAST-flye
contig_19	19013	19978	vanH-A	100	100	plasmid	803393-22-r-R9-Guppy-FAST-flye
contig_19	21024	21611	vanX-A	97.03	100	plasmid	803393-22-r-R9-Guppy-FAST-flye
contig_19	22044	22949	vanY-A	99.67	98.34	plasmid	803393-22-r-R9-Guppy-FAST-flye
contig_19	23105	23500	vanZ-A	81.99	100	plasmid	803393-22-r-R9-Guppy-FAST-flye
contig_19	17242	17931	vanR-A	99.57	97.83	plasmid	803393-22-r-R10-Dorado-FAST-Medaka-2.0
contig_19	17914	18690	vanS-A	67.45	100	plasmid	803393-22-r-R10-Dorado-FAST-Medaka-2.0
contig_19	22328	23293	vanH-A	100	100	plasmid	803393-22-r-R10-Dorado-FAST-Medaka-2.0
contig_19	24340	24924	vanX-A	96.53	98.97	plasmid	803393-22-r-R10-Dorado-FAST-Medaka-2.0
contig_19	25355	26050	vanY-A	76.57	99.57	plasmid	803393-22-r-R10-Dorado-FAST-Medaka-2.0
contig_19	26418	26900	vanZ-A	100	100	plasmid	803393-22-r-R10-Dorado-FAST-Medaka-2.0

## Sheet: esccol
Contig_ID	Start	Stop	Gene	Coverage_pct	Identity_pct	Molecule_type	Sample
2_pilon	140990	141862	blaCTX-M-15	100	100	chromosome	711854-19-r-illumina-new
1	1682891	1683763	blaCTX-M-15	100	100	not_found	711854-19-r-lrp-R10-Dorado-FAST-new
1	1682226	1683098	blaCTX-M-15	100	100	not_found	711854-19-r-lrp-R10-Dorado-HAC-new
1	1682226	1683098	blaCTX-M-15	100	100	not_found	711854-19-r-lrp-R10-Dorado-SUP-new
1	1682904	1683776	blaCTX-M-15	100	100	not_found	711854-19-r-lrp-R10-Guppy-FAST-new
1	1682890	1683762	blaCTX-M-15	100	100	not_found	711854-19-r-lrp-R10-Guppy-HAC-new
1	1682303	1683175	blaCTX-M-15	100	100	not_found	711854-19-r-lrp-R10-Guppy-SUP-new
1	1682891	1683763	blaCTX-M-15	100	100	not_found	711854-19-r-lrp-R10-Rerio-SUP-new
1	1681061	1681933	blaCTX-M-15	100	100	not_found	711854-19-r-lrp-R9-Dorado-FAST-new
1	1681061	1681933	blaCTX-M-15	100	100	not_found	711854-19-r-lrp-R9-Dorado-HAC-new
1	1682599	1683471	blaCTX-M-15	100	100	not_found	711854-19-r-lrp-R9-Dorado-SUP-new
1	1682183	1683055	blaCTX-M-15	100	100	not_found	711854-19-r-lrp-R9-Guppy-FAST-new
1	1682611	1683483	blaCTX-M-15	100	100	not_found	711854-19-r-lrp-R9-Guppy-HAC-new
1	1682398	1683270	blaCTX-M-15	100	100	not_found	711854-19-r-lrp-R9-Guppy-SUP-new
contig_1	2487341	2487874	blaCTX-M	61.17	100	chromosome	711854-19-r-R10-Dorado-FAST-flye
contig_1	2487341	2487874	blaCTX-M	61.17	100	chromosome	711854-19-r-R10-Dorado-FAST-Medaka-2.0
contig_1	2488269	2489141	blaCTX-M-15	100	100	chromosome	711854-19-r-R10-Dorado-FAST-new
contig_1	2290328	2291200	blaCTX-M-15	100	100	chromosome	711854-19-r-R10-Dorado-HAC-flye
contig_2	1386029	1386901	blaCTX-M-15	100	100	chromosome	711854-19-r-R10-Dorado-HAC-Medaka-2.0
contig_2	1386033	1386905	blaCTX-M-15	100	100	chromosome	711854-19-r-R10-Dorado-HAC-new
contig_2	1386034	1386906	blaCTX-M-15	100	100	chromosome	711854-19-r-R10-Dorado-SUP-flye
contig_2	1386033	1386905	blaCTX-M-15	100	100	chromosome	711854-19-r-R10-Dorado-SUP-Medaka-2.0
contig_2	1386030	1386902	blaCTX-M-15	100	100	chromosome	711854-19-r-R10-Dorado-SUP-new
contig_3	4094347	4094880	blaCTX-M	61.17	98.88	chromosome	711854-19-r-R10-Guppy-FAST-flye
contig_3	4095275	4096147	blaCTX-M-15	100	100	chromosome	711854-19-r-R10-Guppy-FAST-new
contig_1	866334	867206	blaCTX-M-15	100	100	chromosome	711854-19-r-R10-Guppy-HAC-flye
contig_1	866329	867201	blaCTX-M-15	100	100	chromosome	711854-19-r-R10-Guppy-HAC-Medaka-2.0
contig_1	866334	867206	blaCTX-M-15	100	100	chromosome	711854-19-r-R10-Guppy-HAC-new
contig_2	3026609	3027481	blaCTX-M-15	100	100	chromosome	711854-19-r-R10-Guppy-SUP-flye
contig_2	3026613	3027485	blaCTX-M-15	100	100	chromosome	711854-19-r-R10-Guppy-SUP-Medaka-2.0
contig_2	3026618	3027490	blaCTX-M-15	100	100	chromosome	711854-19-r-R10-Guppy-SUP-new
contig_2	375468	376340	blaCTX-M-15	100	100	chromosome	711854-19-r-R10-Rerio-SUP-new
contig_1	1165491	1166321	blaCTX-M	96.56	91.81	chromosome	711854-19-r-R9-Dorado-FAST-flye
contig_1	1166599	1167471	blaCTX-M-15	100	100	chromosome	711854-19-r-R9-Dorado-FAST-new
contig_2	2303983	2304855	blaCTX-M	100	99.66	chromosome	711854-19-r-R9-Dorado-HAC-flye
contig_1	1166431	1167303	blaCTX-M-15	100	100	chromosome	711854-19-r-R9-Dorado-HAC-new
contig_3	1198041	1198913	blaCTX-M-15	100	100	chromosome	711854-19-r-R9-Dorado-SUP-flye
contig_1	1166177	1167049	blaCTX-M-15	100	100	chromosome	711854-19-r-R9-Dorado-SUP-new
contig_1	1190093	1190923	blaCTX-M	96.56	91.81	chromosome	711854-19-r-R9-Guppy-FAST-flye
contig_1	1191367	1192239	blaCTX-M-15	100	100	chromosome	711854-19-r-R9-Guppy-FAST-new
contig_1	1197788	1198660	blaCTX-M	100	99.66	chromosome	711854-19-r-R9-Guppy-HAC-flye
contig_1	1198125	1198997	blaCTX-M	100	99.66	chromosome	711854-19-r-R9-Guppy-HAC-new
contig_1	1197846	1198718	blaCTX-M-15	100	100	chromosome	711854-19-r-R9-Guppy-SUP-flye
contig_1	1197959	1198831	blaCTX-M-15	100	100	chromosome	711854-19-r-R9-Guppy-SUP-new
contig_1_polypolish	2488723	2489595	blaCTX-M-15	100	100	chromosome	711854-19-r-srp-R10-Dorado-FAST-new
contig_2_polypolish	1386037	1386909	blaCTX-M-15	100	100	chromosome	711854-19-r-srp-R10-Dorado-HAC-new
contig_2_polypolish	1386036	1386908	blaCTX-M-15	100	100	chromosome	711854-19-r-srp-R10-Dorado-SUP-new
contig_3_polypolish	4095799	4096671	blaCTX-M-15	100	100	chromosome	711854-19-r-srp-R10-Guppy-FAST-new
contig_1_polypolish	866354	867226	blaCTX-M-15	100	100	chromosome	711854-19-r-srp-R10-Guppy-HAC-new
contig_2_polypolish	3026633	3027505	blaCTX-M-15	100	100	chromosome	711854-19-r-srp-R10-Guppy-SUP-new
contig_2_polypolish	375469	376341	blaCTX-M-15	100	100	chromosome	711854-19-r-srp-R10-Rerio-SUP-new
contig_1_polypolish	1166900	1167772	blaCTX-M-15	100	100	chromosome	711854-19-r-srp-R9-Dorado-FAST-new
contig_1_polypolish	1166896	1167768	blaCTX-M-15	100	100	chromosome	711854-19-r-srp-R9-Dorado-HAC-new
contig_1_polypolish	1166894	1167766	blaCTX-M-15	100	100	chromosome	711854-19-r-srp-R9-Dorado-SUP-new
contig_1_polypolish	1191591	1192463	blaCTX-M-15	100	100	chromosome	711854-19-r-srp-R9-Guppy-FAST-new
contig_1_polypolish	1198304	1199176	blaCTX-M-15	100	100	chromosome	711854-19-r-srp-R9-Guppy-HAC-new
contig_1_polypolish	1198082	1198954	blaCTX-M-15	100	100	chromosome	711854-19-r-srp-R9-Guppy-SUP-new

## Sheet: pseaer
Contig_ID	Start	Stop	Gene	Coverage_pct	Identity_pct	Molecule_type	Sample
9_pilon	237804	238601	blaVIM-2	100	100	chromosome	503633-1-21-r-illumina
1	137549	138346	blaVIM-2	100	100	not_found	503633-1-21-r-lrp-R10-Dorado-FAST
1	137549	138346	blaVIM-2	100	100	not_found	503633-1-21-r-lrp-R10-Dorado-HAC
1	137549	138346	blaVIM-2	100	100	not_found	503633-1-21-r-lrp-R10-Dorado-SUP
1	3069910	3070707	blaVIM-2	100	100	not_found	503633-1-21-r-lrp-R10-Guppy-FAST
1	137549	138346	blaVIM-2	100	100	not_found	503633-1-21-r-lrp-R10-Guppy-HAC
1	137549	138346	blaVIM-2	100	100	not_found	503633-1-21-r-lrp-R10-Guppy-SUP
1	137549	138346	blaVIM-2	100	100	not_found	503633-1-21-r-lrp-R10-Rerio-SUP
1	137548	138345	blaVIM-2	100	100	not_found	503633-1-21-r-lrp-R9-Dorado-FAST
1	137548	138345	blaVIM-2	100	100	not_found	503633-1-21-r-lrp-R9-Dorado-HAC
1	137549	138346	blaVIM-2	100	100	not_found	503633-1-21-r-lrp-R9-Dorado-SUP
1	137549	138346	blaVIM-2	100	100	not_found	503633-1-21-r-lrp-R9-Guppy-FAST
1	137549	138346	blaVIM-2	100	100	not_found	503633-1-21-r-lrp-R9-Guppy-HAC
1	137549	138346	blaVIM-2	100	100	not_found	503633-1-21-r-lrp-R9-Guppy-SUP
contig_1	740565	741362	blaVIM-2	100	100	chromosome	503633-1-21-r-R10-Dorado-FAST-flye
contig_1	740565	741362	blaVIM-2	100	100	chromosome	503633-1-21-r-R10-Dorado-FAST-Medaka-2.0
contig_1	741051	741848	blaVIM-2	100	100	chromosome	503633-1-21-r-R10-Dorado-FAST
contig_1	3991968	3992765	blaVIM-2	100	100	chromosome	503633-1-21-r-R10-Dorado-HAC-flye
contig_1	817231	818028	blaVIM-2	100	100	chromosome	503633-1-21-r-R10-Dorado-HAC-Medaka-2.0
contig_1	817234	818031	blaVIM-2	100	100	chromosome	503633-1-21-r-R10-Dorado-HAC
contig_1	817234	818031	blaVIM-2	100	100	chromosome	503633-1-21-r-R10-Dorado-SUP-flye
contig_1	817231	818028	blaVIM-2	100	100	chromosome	503633-1-21-r-R10-Dorado-SUP-Medaka-2.0
contig_1	817234	818031	blaVIM-2	100	100	chromosome	503633-1-21-r-R10-Dorado-SUP
contig_1	3989862	3990659	blaVIM-2	100	100	chromosome	503633-1-21-r-R10-Guppy-FAST-flye
contig_1	3990278	3991075	blaVIM-2	100	100	chromosome	503633-1-21-r-R10-Guppy-FAST-Medaka-2.0
contig_1	3991857	3992654	blaVIM-2	100	100	chromosome	503633-1-21-r-R10-Guppy-FAST
contig_1	817223	818020	blaVIM-2	100	100	chromosome	503633-1-21-r-R10-Guppy-HAC-flye
contig_1	817230	818027	blaVIM-2	100	100	chromosome	503633-1-21-r-R10-Guppy-HAC-Medaka-2.0
contig_1	817233	818030	blaVIM-2	100	100	chromosome	503633-1-21-r-R10-Guppy-HAC
contig_1	3992041	3992838	blaVIM-2	100	100	chromosome	503633-1-21-r-R10-Guppy-SUP-flye
contig_1	3992039	3992836	blaVIM-2	100	100	chromosome	503633-1-21-r-R10-Guppy-SUP-Medaka-2.0
contig_1	3992045	3992842	blaVIM-2	100	100	chromosome	503633-1-21-r-R10-Guppy-SUP
contig_1	3992029	3992826	blaVIM-2	100	100	chromosome	503633-1-21-r-R10-Rerio-SUP
contig_1	1355	2152	blaVIM-2	100	100	chromosome	503633-1-21-r-R9-Dorado-FAST-flye
contig_1	2458074	2458871	blaVIM-2	100	100	chromosome	503633-1-21-r-R9-Dorado-FAST
contig_1	4513729	4514526	blaVIM-2	100	100	chromosome	503633-1-21-r-R9-Dorado-HAC-flye
contig_1	2458123	2458920	blaVIM-2	100	100	chromosome	503633-1-21-r-R9-Dorado-HAC
contig_1	2456182	2456979	blaVIM-2	100	100	chromosome	503633-1-21-r-R9-Dorado-SUP-flye
contig_1	2457967	2458764	blaVIM-2	100	100	chromosome	503633-1-21-r-R9-Dorado-SUP
contig_1	466608	467405	blaVIM-2	100	100	chromosome	503633-1-21-r-R9-Guppy-FAST-flye
contig_1	466855	467652	blaVIM-2	100	100	chromosome	503633-1-21-r-R9-Guppy-FAST
contig_1	299406	300203	blaVIM-2	100	100	chromosome	503633-1-21-r-R9-Guppy-HAC-flye
contig_1	299469	300266	blaVIM-2	100	100	chromosome	503633-1-21-r-R9-Guppy-HAC
contig_6	77250	78047	blaVIM-2	100	100	chromosome	503633-1-21-r-R9-Guppy-SUP-flye
contig_6	77257	78054	blaVIM-2	100	100	chromosome	503633-1-21-r-R9-Guppy-SUP
contig_1_polypolish	741090	741887	blaVIM-2	100	100	chromosome	503633-1-21-r-srp-R10-Dorado-FAST
contig_1_polypolish	817231	818028	blaVIM-2	100	100	chromosome	503633-1-21-r-srp-R10-Dorado-HAC
contig_1_polypolish	817231	818028	blaVIM-2	100	100	chromosome	503633-1-21-r-srp-R10-Dorado-SUP
contig_1_polypolish	3992016	3992813	blaVIM-2	100	100	chromosome	503633-1-21-r-srp-R10-Guppy-FAST
contig_1_polypolish	817231	818028	blaVIM-2	100	100	chromosome	503633-1-21-r-srp-R10-Guppy-HAC
contig_1_polypolish	3992038	3992835	blaVIM-2	100	100	chromosome	503633-1-21-r-srp-R10-Guppy-SUP
contig_1_polypolish	3992038	3992835	blaVIM-2	100	100	chromosome	503633-1-21-r-srp-R10-Rerio-SUP
contig_1_polypolish	2458127	2458924	blaVIM-2	100	100	chromosome	503633-1-21-r-srp-R9-Dorado-FAST
contig_1_polypolish	2458126	2458923	blaVIM-2	100	100	chromosome	503633-1-21-r-srp-R9-Dorado-HAC
contig_1_polypolish	2458126	2458923	blaVIM-2	100	100	chromosome	503633-1-21-r-srp-R9-Dorado-SUP
contig_1_polypolish	466863	467660	blaVIM-2	100	100	chromosome	503633-1-21-r-srp-R9-Guppy-FAST
contig_1_polypolish	299468	300265	blaVIM-2	100	100	chromosome	503633-1-21-r-srp-R9-Guppy-HAC
contig_6_polypolish	77258	78055	blaVIM-2	100	100	chromosome	503633-1-21-r-srp-R9-Guppy-SUP

## Sheet: staaur
Contig_ID	Start	Stop	Gene	Coverage_pct	Identity_pct	Molecule_type	Sample
4_pilon	285073	287076	mecA	100	100	chromosome	803198-22-r-illumina
1	1954521	1956524	mecA	100	100	not_found	803198-22-r-lrp-R10-Dorado-FAST
1	1954521	1956524	mecA	100	100	not_found	803198-22-r-lrp-R10-Dorado-HAC
1	1954521	1956524	mecA	100	100	not_found	803198-22-r-lrp-R10-Dorado-SUP
1	1954296	1956299	mecA	100	100	not_found	803198-22-r-lrp-R10-Guppy-FAST
1	1954521	1956524	mecA	100	100	not_found	803198-22-r-lrp-R10-Guppy-HAC
1	1954521	1956524	mecA	100	100	not_found	803198-22-r-lrp-R10-Guppy-SUP
1	1954294	1956297	mecA	100	100	not_found	803198-22-r-lrp-R10-Rerio-SUP
1	1954563	1956566	mecA	100	100	not_found	803198-22-r-lrp-R9-Dorado-FAST
1	1954563	1956566	mecA	100	100	not_found	803198-22-r-lrp-R9-Dorado-HAC
1	1954521	1956524	mecA	100	100	not_found	803198-22-r-lrp-R9-Dorado-SUP
1	1954626	1956629	mecA	100	100	not_found	803198-22-r-lrp-R9-Guppy-FAST
1	1954584	1956587	mecA	100	100	not_found	803198-22-r-lrp-R9-Guppy-HAC
1	1954521	1956524	mecA	100	100	not_found	803198-22-r-lrp-R9-Guppy-SUP
contig_1	2137034	2139037	mecA	100	99.85	chromosome	803198-22-r-R10-Dorado-FAST
contig_1	2137492	2138496	mecA	50.15	99.7	chromosome	803198-22-r-R10-Dorado-FAST-flye
contig_1	2137492	2138496	mecA	50.15	99.7	chromosome	803198-22-r-R10-Dorado-FAST-Medaka-2.0
contig_1	1847192	1849195	mecA	100	100	chromosome	803198-22-r-R10-Dorado-HAC
contig_1	726754	728757	mecA	100	100	chromosome	803198-22-r-R10-Dorado-HAC-flye
contig_1	1847191	1849194	mecA	100	100	chromosome	803198-22-r-R10-Dorado-HAC-Medaka-2.0
contig_1	1847193	1849196	mecA	100	100	chromosome	803198-22-r-R10-Dorado-SUP
contig_1	1847191	1849194	mecA	100	100	chromosome	803198-22-r-R10-Dorado-SUP-flye
contig_1	1847193	1849196	mecA	100	100	chromosome	803198-22-r-R10-Dorado-SUP-Medaka-2.0
contig_1	2262886	2264889	mecA	100	100	chromosome	803198-22-r-R10-Guppy-FAST
contig_1	2262286	2263290	mecA	50.15	100	chromosome	803198-22-r-R10-Guppy-FAST-flye
contig_1	2263287	2264288	mecA	50	99.7	chromosome	803198-22-r-R10-Guppy-FAST-flye
contig_1	2262524	2264527	mecA	100	100	chromosome	803198-22-r-R10-Guppy-FAST-Medaka-2.0
contig_1	726741	728744	mecA	100	100	chromosome	803198-22-r-R10-Guppy-HAC
contig_1	726736	728739	mecA	100	100	chromosome	803198-22-r-R10-Guppy-HAC-flye
contig_1	726742	728745	mecA	100	100	chromosome	803198-22-r-R10-Guppy-HAC-Medaka-2.0
contig_1	613289	615292	mecA	100	100	chromosome	803198-22-r-R10-Guppy-SUP
contig_1	613289	615292	mecA	100	100	chromosome	803198-22-r-R10-Guppy-SUP-flye
contig_1	613288	615291	mecA	100	100	chromosome	803198-22-r-R10-Guppy-SUP-Medaka-2.0
contig_1	726744	728747	mecA	100	100	chromosome	803198-22-r-R10-Rerio-SUP
contig_1	482107	484110	mecA	100	100	chromosome	803198-22-r-R9-Dorado-FAST
contig_1	482125	484128	mecA	100	100	chromosome	803198-22-r-R9-Dorado-HAC
contig_2	481995	483839	mecA	92.07	100	chromosome	803198-22-r-R9-Dorado-HAC-flye
contig_1	482084	484087	mecA	100	100	chromosome	803198-22-r-R9-Dorado-SUP
contig_1	482053	484056	mecA	100	100	chromosome	803198-22-r-R9-Dorado-SUP-flye
contig_1	482471	483637	mecA	58.23	99.74	chromosome	803198-22-r-R9-Dorado-FAST-flye
contig_1	482106	484109	mecA	100	100	chromosome	803198-22-r-R9-Guppy-FAST
contig_1	482114	484117	mecA	100	100	chromosome	803198-22-r-R9-Guppy-HAC
contig_1	482030	483874	mecA	92.07	100	chromosome	803198-22-r-R9-Guppy-HAC-flye
contig_1	482113	484116	mecA	100	100	chromosome	803198-22-r-R9-Guppy-SUP
contig_1	482075	484078	mecA	100	100	chromosome	803198-22-r-R9-Guppy-SUP-flye
contig_1_polypolish	2137048	2139051	mecA	100	100	chromosome	803198-22-r-srp-R10-Dorado-FAST
contig_1_polypolish	1847192	1849195	mecA	100	100	chromosome	803198-22-r-srp-R10-Dorado-HAC
contig_1_polypolish	1847192	1849195	mecA	100	100	chromosome	803198-22-r-srp-R10-Dorado-SUP
contig_1_polypolish	2262905	2264908	mecA	100	100	chromosome	803198-22-r-srp-R10-Guppy-FAST
contig_1_polypolish	726743	728746	mecA	100	100	chromosome	803198-22-r-srp-R10-Guppy-HAC
contig_1_polypolish	613288	615291	mecA	100	100	chromosome	803198-22-r-srp-R10-Guppy-SUP
contig_1_polypolish	726744	728747	mecA	100	100	chromosome	803198-22-r-srp-R10-Rerio-SUP
contig_1_polypolish	482112	484115	mecA	100	100	chromosome	803198-22-r-srp-R9-Dorado-FAST
contig_1_polypolish	482112	484115	mecA	100	100	chromosome	803198-22-r-srp-R9-Dorado-HAC
contig_1_polypolish	482111	484114	mecA	100	100	chromosome	803198-22-r-srp-R9-Dorado-SUP
contig_1_polypolish	482112	484115	mecA	100	100	chromosome	803198-22-r-srp-R9-Guppy-FAST
contig_1_polypolish	482112	484115	mecA	100	100	chromosome	803198-22-r-srp-R9-Guppy-HAC
contig_1_polypolish	482112	484115	mecA	100	100	chromosome	803198-22-r-srp-R9-Guppy-SUP
