# Supplementary material for: Benchmarking Illumina and Oxford Nanopore Technologies (ONT) sequencing platforms for whole genome sequencing of bacterial genomes and use in clinical microbiology
Source: Research Square preprint supplement (doi:10.21203/rs.3.rs-7036422/v1), 2025-07-10
Supplement: Supplementary file 4 [file a87ebfd43f433b28a157860d.xlsx]

## Sheet: Read_me
Sheet	Description
Sheet 2 - assembly_quality	Assembly quality metrics from QUAST, Bakta along with Allelic and good target percentages from Ridom SeqSphere+
Sheet 3 - Mean_read_depth	Mean read depth for ONT reported from Flye and Illumina calculated from the formula (C=L*N/G)
Headers	Description
Species	Bacterial isolates short name
Samples	Internal sample id
Basecaller	Basecaller used for ONT
Flowcell	Flowcell chemistry for ONT
Mode	Basecalling modes used for ONT
Label	Assembly and polishing methods used
N50	Assembly Length N50
Length	Total assembly length
Contigs	Number of contigs
GC	%G+C from QUAST
CDS	Number of CDS annotated (Bakta)
Pseudogenes	Number of psuedogenes annotated (Bakta)
Mean_CDS_length	Mean CDS length
Total_rRNA	Number of annotated rRNA (Bakta)
Ridom_distance	Allelic distance from reference genomes (Ridom SeqSphere+)
Good_targets_percentage	Percentage of target genes (Ridom SeqSphere+)
Note	Ridom Seqsphere scheme is not available for acipit, bursta and strpyo, so the Ridom distance and Good_targets_percentage is empty

## Sheet: assembly_quality
Species	Samples	Basecaller	Flowcell	Mode	Label	N50	Length	Contigs	GC	CDS	Pseudogenes	Mean_CDS_length	Total_rRNA	Ridom_distance	Good_targets_percentage
acibau_nr	NARA308-r-illumina	Illumina	Illumina	Illumina	Illumina	106981	4203876	175	38.97	4006	5	891.5	3	0	99.4
acibau_nr	NARA308-r-lrp-R10-Dorado-FAST	Dorado	R10	FAST	lrp	4138008	4323013	4	39.08	4175	6	890.7	18	0	99.4
acibau_nr	NARA308-r-lrp-R10-Dorado-HAC	Dorado	R10	HAC	lrp	4136799	4321804	4	39.08	4174	6	890.6	18	0	99.4
acibau_nr	NARA308-r-lrp-R10-Dorado-SUP	Dorado	R10	SUP	lrp	4136799	4321804	4	39.08	4174	6	890.6	18	0	99.4
acibau_nr	NARA308-r-lrp-R10-Guppy-FAST	Guppy	R10	FAST	lrp	4138202	4323207	4	39.08	4177	7	890.3	18	0	99.4
acibau_nr	NARA308-r-lrp-R10-Guppy-HAC	Guppy	R10	HAC	lrp	4138008	4323013	4	39.08	4175	6	890.7	18	0	99.4
acibau_nr	NARA308-r-lrp-R10-Guppy-SUP	Guppy	R10	SUP	lrp	4136799	4321804	4	39.08	4174	6	890.6	18	0	99.4
acibau_nr	NARA308-r-lrp-R10-Rerio-SUP	Rerio	R10	SUP	lrp	4138008	4323013	4	39.08	4175	6	890.7	18	0	99.4
acibau_nr	NARA308-r-lrp-R9-Dorado-FAST	Dorado	R9	FAST	lrp	3609960	4309397	27	39.07	4144	7	892.4	18	0	99.4
acibau_nr	NARA308-r-lrp-R9-Dorado-HAC	Dorado	R9	HAC	lrp	3609960	4309397	27	39.07	4144	7	892.4	18	0	99.4
acibau_nr	NARA308-r-lrp-R9-Dorado-SUP	Dorado	R9	SUP	lrp	3609961	4309398	27	39.07	4144	6	892.5	18	0	99.4
acibau_nr	NARA308-r-lrp-R9-Guppy-FAST	Guppy	R9	FAST	lrp	2619019	4303562	37	39.06	4145	6	892	15	0	99.4
acibau_nr	NARA308-r-lrp-R9-Guppy-HAC	Guppy	R9	HAC	lrp	3609960	4309397	27	39.07	4145	7	892.2	18	0	99.4
acibau_nr	NARA308-r-lrp-R9-Guppy-SUP	Guppy	R9	SUP	lrp	3609692	4309129	27	39.07	4143	6	892.6	18	0	99.4
acibau_nr	NARA308-r-R10-Dorado-FAST-flye	Dorado	R10	FAST	flye	4137325	4350303	6	39.06	5013	494	735.3	18	25	90.5
acibau_nr	NARA308-r-R10-Dorado-FAST-Medaka-2.0	Dorado	R10	FAST	med2.0	4137325	4350303	6	39.06	5015	497	735.1	18	148	72.1
acibau_nr	NARA308-r-R10-Dorado-FAST	Dorado	R10	FAST	med1.7	4138190	4351229	6	39.06	4453	156	834.5	18	148	72.1
acibau_nr	NARA308-r-R10-Dorado-HAC-flye	Dorado	R10	HAC	flye	4138864	4351870	6	39.07	4202	8	888.2	18	0	99.4
acibau_nr	NARA308-r-R10-Dorado-HAC-Medaka-2.0	Dorado	R10	HAC	med2.0	4138360	4338508	6	39.07	4193	6	888.5	18	1	99.3
acibau_nr	NARA308-r-R10-Dorado-HAC	Dorado	R10	HAC	med1.7	4138363	4338520	6	39.07	4187	6	888.8	18	1	99.4
acibau_nr	NARA308-r-R10-Dorado-SUP-flye	Dorado	R10	SUP	flye	4138358	4338515	6	39.07	4187	6	888.8	18	0	99.4
acibau_nr	NARA308-r-R10-Dorado-SUP-Medaka-2.0	Dorado	R10	SUP	med2.0	4138364	4338521	6	39.07	4187	6	888.8	18	0	99.4
acibau_nr	NARA308-r-R10-Dorado-SUP	Dorado	R10	SUP	med1.7	4138363	4338520	6	39.07	4187	6	888.8	18	0	99.4
acibau_nr	NARA308-r-R10-Guppy-FAST-flye	Guppy	R10	FAST	flye	4137273	4387867	7	39.06	4971	404	746.9	18	38	93.6
acibau_nr	NARA308-r-R10-Guppy-FAST-Medaka-2.0	Guppy	R10	FAST	med2.0	4137175	4387697	7	39.07	4939	417	749.6	18	148	76.2
acibau_nr	NARA308-r-R10-Guppy-FAST	Guppy	R10	FAST	med1.7	4138142	4388814	7	39.07	4434	116	843.8	18	98	77.4
acibau_nr	NARA308-r-R10-Guppy-HAC-flye	Guppy	R10	HAC	flye	4138864	4360604	6	39.06	4218	10	886	18	1	99.2
acibau_nr	NARA308-r-R10-Guppy-HAC-Medaka-2.0	Guppy	R10	HAC	med2.0	4138882	4360606	6	39.06	4223	19	885.3	18	0	99
acibau_nr	NARA308-r-R10-Guppy-HAC	Guppy	R10	HAC	med1.7	4138879	4360652	6	39.06	4219	15	885.9	18	0	99.3
acibau_nr	NARA308-r-R10-Guppy-SUP-flye	Guppy	R10	SUP	flye	4138877	4351884	6	39.07	4203	6	888	18	1	99.4
acibau_nr	NARA308-r-R10-Guppy-SUP-Medaka-2.0	Guppy	R10	SUP	med2.0	4138880	4351874	6	39.07	4210	15	886.7	18	1	99.4
acibau_nr	NARA308-r-R10-Guppy-SUP	Guppy	R10	SUP	med1.7	4138878	4351895	6	39.07	4210	13	886.8	18	1	99.4
acibau_nr	NARA308-r-R10-Rerio-SUP	Rerio	R10	SUP	flye	4138879	4339037	6	39.07	4186	6	889.8	18	0	99.4
acibau_nr	NARA308-r-R9-Dorado-FAST-flye	Dorado	R9	FAST	flye	2337158	4303170	14	39.09	4975	466	731	18	1	96.8
acibau_nr	NARA308-r-R9-Dorado-FAST	Dorado	R9	FAST	med1.7	2338689	4305836	14	39.08	4213	45	876.6	18	2	70.3
acibau_nr	NARA308-r-R9-Dorado-HAC-flye	Dorado	R9	HAC	flye	2338174	4311049	16	39.09	4544	202	808.4	18	0	93.4
acibau_nr	NARA308-r-R9-Dorado-HAC	Dorado	R9	HAC	med1.7	2338719	4305502	14	39.08	4304	88	856.7	18	1	84.9
acibau_nr	NARA308-r-R9-Dorado-SUP-flye	Dorado	R9	SUP	flye	2499682	4304914	14	39.09	4353	107	845.3	18	1	93.7
acibau_nr	NARA308-r-R9-Dorado-SUP	Dorado	R9	SUP	med1.7	2338414	4305365	14	39.08	4321	91	851.7	18	1	92.2
acibau_nr	NARA308-r-R9-Guppy-FAST-flye	Guppy	R9	FAST	flye	2421630	4321775	14	39.09	5271	595	687.1	18	4	96.9
acibau_nr	NARA308-r-R9-Guppy-FAST	Guppy	R9	FAST	med1.7	2423651	4325233	14	39.07	4251	60	871	18	6	62
acibau_nr	NARA308-r-R9-Guppy-HAC-flye	Guppy	R9	HAC	flye	2434026	4307805	18	39.08	4428	127	831	18	0	98.8
acibau_nr	NARA308-r-R9-Guppy-HAC	Guppy	R9	HAC	med1.7	2434559	4308692	18	39.08	4176	18	885.5	18	0	88.7
acibau_nr	NARA308-r-R9-Guppy-SUP-flye	Guppy	R9	SUP	flye	488179	4297792	19	39.09	4250	57	866.5	18	0	99
acibau_nr	NARA308-r-R9-Guppy-SUP	Guppy	R9	SUP	med1.7	488225	4298184	19	39.08	4155	20	887.4	18	2	96.2
acibau_nr	NARA308-r-srp-R10-Dorado-FAST	Dorado	R10	FAST	srp	4138351	4351414	6	39.06	4203	6	887.6	18	0	99.4
acibau_nr	NARA308-r-srp-R10-Dorado-HAC	Dorado	R10	HAC	srp	4138365	4338522	6	39.07	4186	6	889	18	0	99.4
acibau_nr	NARA308-r-srp-R10-Dorado-SUP	Dorado	R10	SUP	srp	4138365	4338522	6	39.07	4186	6	889	18	0	99.4
acibau_nr	NARA308-r-srp-R10-Guppy-FAST	Guppy	R10	FAST	srp	4138358	4389049	7	39.07	4264	8	881.5	18	0	99.4
acibau_nr	NARA308-r-srp-R10-Guppy-HAC	Guppy	R10	HAC	srp	4138883	4360626	6	39.06	4214	6	887.3	18	0	99.4
acibau_nr	NARA308-r-srp-R10-Guppy-SUP	Guppy	R10	SUP	srp	4138881	4351895	6	39.07	4203	7	888.2	18	0	99.4
acibau_nr	NARA308-r-srp-R10-Rerio-SUP	Rerio	R10	SUP	srp	4138881	4339039	6	39.07	4184	6	890.2	18	0	99.4
acibau_nr	NARA308-r-srp-R9-Dorado-FAST	Dorado	R9	FAST	srp	2338694	4305857	14	39.08	4151	6	890.9	18	0	99.4
acibau_nr	NARA308-r-srp-R9-Dorado-HAC	Dorado	R9	HAC	srp	2338689	4305443	14	39.08	4155	6	889.8	18	0	99.4
acibau_nr	NARA308-r-srp-R9-Dorado-SUP	Dorado	R9	SUP	srp	2338689	4305904	14	39.08	4162	9	888.3	18	0	99.4
acibau_nr	NARA308-r-srp-R9-Guppy-FAST	Guppy	R9	FAST	srp	2423707	4325332	14	39.07	4177	6	888.3	18	0	99.4
acibau_nr	NARA308-r-srp-R9-Guppy-HAC	Guppy	R9	HAC	srp	2434548	4308676	18	39.08	4165	6	888.7	18	0	99.4
acibau_nr	NARA308-r-srp-R9-Guppy-SUP	Guppy	R9	SUP	srp	488235	4298222	19	39.08	4142	5	890.2	18	0	99.4
acibau_r	502578-21-lrp-R10-Rerio-SUP	Rerio	R10	SUP	lrp	4076705	4173695	3	38.97	4017	6	891.2	18	0	99.3
acibau_r	502578-21-r-illumina	Illumina	Illumina	Illumina	Illumina	190722	4066647	181	38.84	3858	5	892	3	0	99.3
acibau_r	502578-21-r-lrp-R10-Dorado-FAST	Dorado	R10	FAST	lrp	4076675	4173664	3	38.97	4016	6	891.4	18	0	99.3
acibau_r	502578-21-r-lrp-R10-Dorado-HAC	Dorado	R10	HAC	lrp	4076705	4173694	3	38.97	4017	6	891.2	18	0	99.3
acibau_r	502578-21-r-lrp-R10-Dorado-SUP	Dorado	R10	SUP	lrp	4076705	4173694	3	38.97	4017	6	891.2	18	0	99.3
acibau_r	502578-21-r-lrp-R10-Guppy-FAST	Guppy	R10	FAST	lrp	4076699	4173688	3	38.97	4015	6	891.6	18	0	99.3
acibau_r	502578-21-r-lrp-R10-Guppy-HAC	Guppy	R10	HAC	lrp	4076698	4173687	3	38.97	4017	6	891.2	18	0	99.3
acibau_r	502578-21-r-lrp-R10-Guppy-SUP	Guppy	R10	SUP	lrp	4076705	4173694	3	38.97	4017	6	891.2	18	0	99.3
acibau_r	502578-21-r-lrp-R9-Dorado-FAST	Dorado	R9	FAST	lrp	4073084	4170073	3	38.97	4010	6	891.9	18	0	99.3
acibau_r	502578-21-r-lrp-R9-Dorado-HAC	Dorado	R9	HAC	lrp	4071312	4168302	3	38.97	4008	6	891.9	18	0	99.3
acibau_r	502578-21-r-lrp-R9-Dorado-SUP	Dorado	R9	SUP	lrp	4071829	4168818	3	38.97	4012	7	891	18	0	99.3
acibau_r	502578-21-r-lrp-R9-Guppy-FAST	Guppy	R9	FAST	lrp	3863817	4170069	4	38.97	4011	6	891.7	18	0	99.3
acibau_r	502578-21-r-lrp-R9-Guppy-HAC	Guppy	R9	HAC	lrp	3863817	4170069	4	38.97	4011	6	891.7	18	0	99.3
acibau_r	502578-21-r-lrp-R9-Guppy-SUP	Guppy	R9	SUP	lrp	3863817	4170069	4	38.97	4011	6	891.7	18	0	99.3
acibau_r	502578-21-r-R10-Dorado-FAST	Dorado	R10	FAST	med1.7	3784976	4147349	7	39.01	4595	430	756.2	18	67	77.4
acibau_r	502578-21-r-R10-Dorado-FAST-flye	Dorado	R10	FAST	flye	3782333	4144688	7	38.99	5783	1122	580.6	18	199	45.1
acibau_r	502578-21-r-R10-Dorado-FAST-Medaka-2.0	Dorado	R10	FAST	med2.0	3781924	4143954	7	39.02	5795	1119	580.2	18	137	44.8
acibau_r	502578-21-r-R10-Dorado-HAC	Dorado	R10	HAC	med1.7	4076030	4173018	3	38.97	4025	10	888.6	18	7	99.1
acibau_r	502578-21-r-R10-Dorado-HAC-flye	Dorado	R10	HAC	flye	4075550	4177998	3	38.97	4069	29	879.1	18	21	97.8
acibau_r	502578-21-r-R10-Dorado-HAC-Medaka-2.0	Dorado	R10	HAC	med2.0	4075951	4172936	3	38.97	4029	11	887.6	18	1	99.0
acibau_r	502578-21-r-R10-Dorado-SUP	Dorado	R10	SUP	med1.7	4076078	4173067	3	38.97	4028	10	888	18	13	99.1
acibau_r	502578-21-r-R10-Dorado-SUP-flye	Dorado	R10	SUP	flye	4075846	4172835	3	38.97	4034	16	886.6	18	12	99.1
acibau_r	502578-21-r-R10-Dorado-SUP-Medaka-2.0	Dorado	R10	SUP	med2.0	4076162	4173153	3	38.97	4022	10	889.3	18	0	99.2
acibau_r	502578-21-r-R10-Guppy-FAST	Guppy	R10	FAST	med1.7	3769424	4152571	12	39.04	4555	388	760.8	18	73	77.1
acibau_r	502578-21-r-R10-Guppy-FAST-flye	Guppy	R10	FAST	flye	3766497	4150125	12	39.03	5872	1137	571.9	18	215	43.7
acibau_r	502578-21-r-R10-Guppy-FAST-Medaka-2.0	Guppy	R10	FAST	med2.0	3766150	4148577	12	39.06	5842	1146	575.2	18	114	44.1
acibau_r	502578-21-r-R10-Guppy-HAC	Guppy	R10	HAC	med1.7	4076684	4179198	5	38.97	4060	25	881.8	18	14	98.3
acibau_r	502578-21-r-R10-Guppy-HAC-flye	Guppy	R10	HAC	flye	4076650	4179161	5	38.97	4068	31	880	18	16	97.8
acibau_r	502578-21-r-R10-Guppy-HAC-Medaka-2.0	Guppy	R10	HAC	med2.0	4076680	4179177	5	38.97	4050	16	884.1	18	1	98.6
acibau_r	502578-21-r-R10-Guppy-SUP	Guppy	R10	SUP	med1.7	4076338	4180834	5	38.97	4043	18	885.9	18	12	99.0
acibau_r	502578-21-r-R10-Guppy-SUP-flye	Guppy	R10	SUP	flye	4075487	4179969	5	38.97	4038	12	887.2	18	13	99.0
acibau_r	502578-21-r-R10-Guppy-SUP-Medaka-2.0	Guppy	R10	SUP	med2.0	4076305	4180811	5	38.97	4031	15	888.3	18	2	99.2
acibau_r	502578-21-r-R10-Rerio-SUP	Rerio	R10	SUP	flye	4075614	4179648	3	38.97	4034	8	888.3	18	4	99.2
acibau_r	502578-21-r-R9-Dorado-FAST	Dorado	R9	FAST	med1.7	549376	4199219	21	39.01	4364	227	817.8	15	5	89.4
acibau_r	502578-21-r-R9-Dorado-FAST-flye	Dorado	R9	FAST	flye	549097	4196991	21	39.03	4775	449	738.6	15	41	72.5
acibau_r	502578-21-r-R9-Dorado-HAC	Dorado	R9	HAC	med1.7	544158	4190832	12	39.01	4100	75	871.5	18	9	96.1
acibau_r	502578-21-r-R9-Dorado-HAC-flye	Dorado	R9	HAC	flye	370861	4180891	22	39	4339	195	817.6	18	28	86.6
acibau_r	502578-21-r-R9-Dorado-SUP	Dorado	R9	SUP	med1.7	544107	4190510	12	39.02	4089	69	874.3	18	13	96.6
acibau_r	502578-21-r-R9-Dorado-SUP-flye	Dorado	R9	SUP	flye	544037	4190036	12	39.02	4222	115	845.6	18	26	92.5
acibau_r	502578-21-r-R9-Guppy-FAST	Guppy	R9	FAST	med1.7	549321	4196832	21	39.02	4385	233	811.5	15	12	88.5
acibau_r	502578-21-r-R9-Guppy-FAST-flye	Guppy	R9	FAST	flye	548971	4194116	21	39.03	5022	591	696.6	15	47	64.0
acibau_r	502578-21-r-R9-Guppy-HAC	Guppy	R9	HAC	med1.7	549384	4197229	21	39.01	4625	387	766.3	15	32	79.5
acibau_r	502578-21-r-R9-Guppy-HAC-flye	Guppy	R9	HAC	flye	594136	4174091	16	39	4237	134	836.4	18	31	89.7
acibau_r	502578-21-r-R9-Guppy-SUP	Guppy	R9	SUP	med1.7	549189	4194467	21	39.02	4674	386	757.7	15	47	78.6
acibau_r	502578-21-r-R9-Guppy-SUP-flye	Guppy	R9	SUP	flye	2291367	4192847	14	39.03	4120	65	869.1	18	33	95.6
acibau_r	502578-21-r-srp-R10-Dorado-FAST	Dorado	R10	FAST	srp	3786229	4148861	7	39	3975	9	893.5	18	0	99.1
acibau_r	502578-21-r-srp-R10-Dorado-HAC	Dorado	R10	HAC	srp	4076036	4173026	3	38.97	4016	6	890.8	18	0	99.3
acibau_r	502578-21-r-srp-R10-Dorado-SUP	Dorado	R10	SUP	srp	4076097	4173087	3	38.97	4017	6	890.6	18	0	99.3
acibau_r	502578-21-r-srp-R10-Guppy-FAST	Guppy	R10	FAST	srp	3770843	4154320	12	39.04	3994	12	888.9	18	1	99.1
acibau_r	502578-21-r-srp-R10-Guppy-HAC	Guppy	R10	HAC	srp	4076705	4179232	5	38.97	4029	8	889.3	18	0	99.3
acibau_r	502578-21-r-srp-R10-Guppy-SUP	Guppy	R10	SUP	srp	4076336	4180811	5	38.97	4028	8	889.5	18	0	99.3
acibau_r	502578-21-r-srp-R10-Rerio-SUP	Rerio	R10	SUP	srp	4075603	4179636	3	38.97	4031	6	889.1	18	0	99.3
acibau_r	502578-21-r-srp-R9-Dorado-FAST	Dorado	R9	FAST	srp	549385	4199163	21	39.01	4055	9	888.2	15	0	98.3
acibau_r	502578-21-r-srp-R9-Dorado-HAC	Dorado	R9	HAC	srp	544093	4190584	12	39.02	4023	7	891.9	18	0	98.7
acibau_r	502578-21-r-srp-R9-Dorado-SUP	Dorado	R9	SUP	srp	544093	4190573	12	39.02	4023	8	892.1	18	0	98.7
acibau_r	502578-21-r-srp-R9-Guppy-FAST	Guppy	R9	FAST	srp	549347	4196907	21	39.02	4043	7	890.1	15	0	98.3
acibau_r	502578-21-r-srp-R9-Guppy-HAC	Guppy	R9	HAC	srp	549347	4196842	21	39.02	4047	8	889.1	15	0	98.3
acibau_r	502578-21-r-srp-R9-Guppy-SUP	Guppy	R9	SUP	srp	549333	4195403	21	39.01	4046	9	889.2	15	0	98.3
acipit	500441-22-s-illumina	Illumina	Illumina	Illumina	Illumina	127790	3905894	98	38.71	3654	9	906.3	3
acipit	500441-22-s-lrp-R10-Dorado-FAST	Dorado	R10	FAST	lrp	3856505	3998606	5	38.8	3742	10	909	18
acipit	500441-22-s-lrp-R10-Dorado-HAC	Dorado	R10	HAC	lrp	3858496	4000597	5	38.8	3747	10	908.1	18
acipit	500441-22-s-lrp-R10-Dorado-SUP	Dorado	R10	SUP	lrp	3858496	4000597	5	38.8	3747	10	908.1	18
acipit	500441-22-s-lrp-R10-Guppy-FAST	Guppy	R10	FAST	lrp	3855478	3997579	5	38.8	3732	10	910.5	18
acipit	500441-22-s-lrp-R10-Guppy-HAC	Guppy	R10	HAC	lrp	3856505	3998606	5	38.8	3742	10	909	18
acipit	500441-22-s-lrp-R10-Guppy-SUP	Guppy	R10	SUP	lrp	3858496	4000597	5	38.8	3747	10	908.1	18
acipit	500441-22-s-lrp-R10-Rerio-SUP	Rerio	R10	SUP	lrp	2425526	3994316	11	38.81	3730	10	910.6	18
acipit	500441-22-s-lrp-R9-Dorado-FAST	Dorado	R9	FAST	lrp	3858496	4000597	5	38.8	3747	10	908.1	18
acipit	500441-22-s-lrp-R9-Dorado-HAC	Dorado	R9	HAC	lrp	3858496	4000597	5	38.8	3747	10	908.1	18
acipit	500441-22-s-lrp-R9-Dorado-SUP	Dorado	R9	SUP	lrp	3858496	4000597	5	38.8	3747	10	908.1	18
acipit	500441-22-s-lrp-R9-Guppy-FAST	Guppy	R9	FAST	lrp	3857824	3999925	5	38.8	3747	10	907.9	18
acipit	500441-22-s-lrp-R9-Guppy-HAC	Guppy	R9	HAC	lrp	3858496	4000597	5	38.8	3747	10	908.1	18
acipit	500441-22-s-lrp-R9-Guppy-SUP	Guppy	R9	SUP	lrp	3858243	4000344	5	38.8	3748	10	907.8	18
acipit	500441-22-s-R10-Dorado-FAST-flye	Dorado	R10	FAST	flye	3679520	4001446	6	38.8	5190	832	633.3	18
acipit	500441-22-s-R10-Dorado-FAST	Dorado	R10	FAST	med1.7	3853286	4045721	7	38.78	4120	221	824.1	18
acipit	500441-22-s-R10-Dorado-FAST-Medaka-2.0	Dorado	R10	FAST	med2.0	3852022	4044310	7	38.79	4814	579	696.2	18
acipit	500441-22-s-R10-Dorado-HAC-flye	Dorado	R10	HAC	flye	675974	4047863	10	38.76	3833	39	895	18
acipit	500441-22-s-R10-Dorado-HAC	Dorado	R10	HAC	med1.7	3858503	4049998	7	38.76	3814	14	901.5	18
acipit	500441-22-s-R10-Dorado-HAC-Medaka-2.0	Dorado	R10	HAC	med2.0	3858503	4050513	7	38.75	3813	15	902	18
acipit	500441-22-s-R10-Dorado-SUP-flye	Dorado	R10	SUP	flye	3036744	4046267	8	38.76	3812	19	900.8	18
acipit	500441-22-s-R10-Dorado-SUP	Dorado	R10	SUP	med1.7	3854182	4052315	8	38.78	3802	13	903.3	18
acipit	500441-22-s-R10-Dorado-SUP-Medaka-2.0	Dorado	R10	SUP	med2.0	3854182	4052207	8	38.78	3806	16	902.8	18
acipit	500441-22-s-R10-Guppy-FAST-flye	Guppy	R10	FAST	flye	3692651	4035924	9	38.78	5026	708	662.3	18
acipit	500441-22-s-R10-Guppy-FAST	Guppy	R10	FAST	med1.7	3853219	4005507	5	38.8	4059	209	830.3	18
acipit	500441-22-s-R10-Guppy-FAST-Medaka-2.0	Guppy	R10	FAST	med2.0	3852063	4004261	5	38.81	4707	538	708.7	18
acipit	500441-22-s-R10-Guppy-HAC-flye	Guppy	R10	HAC	flye	1757601	4035937	10	38.77	3837	27	891.8	18
acipit	500441-22-s-R10-Guppy-HAC	Guppy	R10	HAC	med1.7	3859367	4024673	6	38.77	3786	14	902	18
acipit	500441-22-s-R10-Guppy-HAC-Medaka-2.0	Guppy	R10	HAC	med2.0	3859355	4024644	6	38.77	3784	17	902.5	18
acipit	500441-22-s-R10-Guppy-SUP-flye	Guppy	R10	SUP	flye	1363926	4033174	11	38.77	3791	17	903.2	18
acipit	500441-22-s-R10-Guppy-SUP	Guppy	R10	SUP	med1.7	3858503	4012803	6	38.79	3764	11	904.8	18
acipit	500441-22-s-R10-Guppy-SUP-Medaka-2.0	Guppy	R10	SUP	med2.0	3858499	4012795	6	38.78	3764	11	904.9	18
acipit	500441-22-s-R10-Rerio-SUP	Rerio	R10	SUP	flye	3858506	4060951	7	38.74	3828	13	900.4	18
acipit	500441-22-s-R9-Dorado-FAST-flye	Dorado	R9	FAST	flye	85677	3690531	81	39.23	5560	1099	515.4	12
acipit	500441-22-s-R9-Dorado-FAST	Dorado	R9	FAST	med1.7	3858687	4008615	5	38.8	3855	71	882.1	18
acipit	500441-22-s-R9-Dorado-HAC-flye	Dorado	R9	HAC	flye	117477	3836104	56	39.07	4632	646	673.7	12
acipit	500441-22-s-R9-Dorado-HAC	Dorado	R9	HAC	med1.7	3858531	3976096	5	38.83	3748	23	900.9	18
acipit	500441-22-s-R9-Dorado-SUP-flye	Dorado	R9	SUP	flye	121139	3872580	56	38.99	4415	557	715.9	12
acipit	500441-22-s-R9-Dorado-SUP	Dorado	R9	SUP	med1.7	3858477	4000580	4	38.8	3763	29	903.2	18
acipit	500441-22-s-R9-Guppy-FAST-flye	Guppy	R9	FAST	flye	72621	3751048	100	39.16	5907	1234	487.8	12
acipit	500441-22-s-R9-Guppy-FAST	Guppy	R9	FAST	med1.7	3877635	3997625	4	38.83	3852	77	882	18
acipit	500441-22-s-R9-Guppy-HAC-flye	Guppy	R9	HAC	flye	106399	3877577	84	39.03	4515	588	701.7	12
acipit	500441-22-s-R9-Guppy-HAC	Guppy	R9	HAC	med1.7	3858558	3962034	3	38.83	3714	18	907	18
acipit	500441-22-s-R9-Guppy-SUP-flye	Guppy	R9	SUP	flye	107384	3842764	76	39.09	4039	337	790.8	15
acipit	500441-22-s-R9-Guppy-SUP	Guppy	R9	SUP	med1.7	3870144	4006742	3	38.81	3754	13	906.8	18
acipit	500441-22-s-srp-R10-Dorado-FAST	Dorado	R10	FAST	srp	3853685	4046144	7	38.78	3800	13	903.7	18
acipit	500441-22-s-srp-R10-Dorado-HAC	Dorado	R10	HAC	srp	3858504	4050000	7	38.75	3806	11	903.9	18
acipit	500441-22-s-srp-R10-Dorado-SUP	Dorado	R10	SUP	srp	3854183	4052359	8	38.78	3798	14	905	18
acipit	500441-22-s-srp-R10-Guppy-FAST	Guppy	R10	FAST	srp	3853663	4005973	5	38.79	3756	11	905.9	18
acipit	500441-22-s-srp-R10-Guppy-HAC	Guppy	R10	HAC	srp	3859362	4024668	6	38.77	3778	10	904.6	18
acipit	500441-22-s-srp-R10-Guppy-SUP	Guppy	R10	SUP	srp	3858501	4012801	6	38.78	3762	10	905.4	18
acipit	500441-22-s-srp-R10-Rerio-SUP	Rerio	R10	SUP	srp	3858505	4060935	7	38.74	3829	11	900.7	18
acipit	500441-22-s-srp-R9-Dorado-FAST	Dorado	R9	FAST	srp	3858515	4008423	5	38.8	3763	10	904.9	18
acipit	500441-22-s-srp-R9-Dorado-HAC	Dorado	R9	HAC	srp	3858507	3976067	5	38.83	3726	9	907	18
acipit	500441-22-s-srp-R9-Dorado-SUP	Dorado	R9	SUP	srp	3858504	4000609	4	38.8	3744	10	908.3	18
acipit	500441-22-s-srp-R9-Guppy-FAST	Guppy	R9	FAST	srp	3877409	3997387	4	38.84	3734	10	910.9	18
acipit	500441-22-s-srp-R9-Guppy-HAC	Guppy	R9	HAC	srp	3858506	3961976	3	38.83	3700	9	910.9	18
acipit	500441-22-s-srp-R9-Guppy-SUP	Guppy	R9	SUP	srp	3870154	4006751	3	38.81	3746	10	909.1	18
bursta	ATCCBAA67_illumina	Illumina	Illumina	Illumina	Illumina	200497	8622924	149	66.4	7804	13	942.5	4
bursta	ATCCBAA67_lrp_R10_Dorado_FAST	Dorado	R10	FAST	lrp	3317445	8761794	4	66.3	7936	13	943.6	18
bursta	ATCCBAA67_lrp_R10_Dorado_HAC	Dorado	R10	HAC	lrp	3317882	8761800	4	66.3	7933	12	944.6	17
bursta	ATCCBAA67_lrp_R10_Dorado_SUP	Dorado	R10	SUP	lrp	3317883	8762208	4	66.3	7929	12	944.6	18
bursta	ATCCBAA67_lrp_R10_Guppy_FAST	Guppy	R10	FAST	lrp	3317875	8762151	4	66.3	7937	14	943.5	18
bursta	ATCCBAA67_lrp_R10_Guppy_HAC	Guppy	R10	HAC	lrp	3317398	8761722	4	66.3	7935	13	943.7	18
bursta	ATCCBAA67_lrp_R10_Guppy_SUP	Guppy	R10	SUP	lrp	3317883	8762209	4	66.3	7926	12	944.6	18
bursta	ATCCBAA67_lrp_R10_Rerio_SUP	Rerio	R10	SUP	lrp	3317883	8762220	4	66.3	7929	12	944.6	18
bursta	ATCCBAA67_lrp_R9_Dorado_FAST	Dorado	R9	FAST	lrp	3317884	8762200	4	66.3	7932	12	944	18
bursta	ATCCBAA67_lrp_R9_Dorado_HAC	Dorado	R9	HAC	lrp	3317880	8762198	4	66.3	7927	12	944.5	18
bursta	ATCCBAA67_lrp_R9_Dorado_SUP	Dorado	R9	SUP	lrp	3317881	8762204	4	66.3	7929	12	944.3	18
bursta	ATCCBAA67_lrp_R9_Guppy_FAST	Guppy	R9	FAST	lrp	3317883	8762234	4	66.3	7929	12	944.5	18
bursta	ATCCBAA67_lrp_R9_Guppy_HAC	Guppy	R9	HAC	lrp	3317883	8762203	4	66.3	7930	12	944.4	18
bursta	ATCCBAA67_lrp_R9_Guppy_SUP	Guppy	R9	SUP	lrp	3317883	8762213	4	66.3	7928	12	944.4	18
bursta	ATCCBAA67_R10_Dorado_FAST_flye	Dorado	R10	FAST	flye	3316901	11170369	36	59.1	12984	1617	697	31
bursta	ATCCBAA67_R10_Dorado_FAST_medaka_2.0	Dorado	R10	FAST	med2.0	3316718	11168391	36	59.1	12887	1572	704.8	31
bursta	ATCCBAA67_R10_Dorado_FAST	Dorado	R10	FAST	med1.7	3318510	11174266	36	59.09	11172	569	830.1	31
bursta	ATCCBAA67_R10_Dorado_HAC_flye	Dorado	R10	HAC	flye	3318857	9773227	42	62.94	8903	86	919.8	21
bursta	ATCCBAA67_R10_Dorado_HAC_medaka_2.0	Dorado	R10	HAC	med2.0	3318911	9772699	42	62.93	8881	51	924.4	21
bursta	ATCCBAA67_R10_Dorado_HAC	Dorado	R10	HAC	med1.7	3318902	9772863	42	62.93	8883	57	924.9	21
bursta	ATCCBAA67_R10_Dorado_SUP_flye	Dorado	R10	SUP	flye	3318942	9885850	43	62.58	9019	61	925	21
bursta	ATCCBAA67_R10_Dorado_SUP_medaka_2.0	Dorado	R10	SUP	med2.0	3318941	9885322	43	62.58	9003	45	927.4	21
bursta	ATCCBAA67_R10_Dorado_SUP	Dorado	R10	SUP	med1.7	3318935	9885314	43	62.58	9000	44	927.6	21
bursta	ATCCBAA67_R10_Guppy_FAST_flye	Guppy	R10	FAST	flye	3317045	11160684	40	59.12	13135	1655	685.8	33
bursta	ATCCBAA67_R10_Guppy_FAST_medaka_2.0	Guppy	R10	FAST	med2.0	3316741	11158082	40	59.12	12986	1578	695.4	33
bursta	ATCCBAA67_R10_Guppy_FAST	Guppy	R10	FAST	med1.7	3318573	11163971	40	59.11	11317	651	814.5	33
bursta	ATCCBAA67_R10_Guppy_HAC_flye	Guppy	R10	HAC	flye	3318903	10097694	49	61.98	9272	120	911.9	22
bursta	ATCCBAA67_R10_Guppy_HAC_medaka_2.0	Guppy	R10	HAC	med2.0	3318914	10096936	49	61.98	9243	75	918	22
bursta	ATCCBAA67_R10_Guppy_HAC	Guppy	R10	HAC	med1.7	3318934	10097044	49	61.98	9255	85	916.8	22
bursta	ATCCBAA67_R10_Guppy_SUP_flye	Guppy	R10	SUP	flye	3318954	10034504	42	62.14	9171	57	923.8	23
bursta	ATCCBAA67_R10_Guppy_SUP_medaka_2.0	Guppy	R10	SUP	med2.0	3318941	10033904	42	62.14	9164	42	925.9	23
bursta	ATCCBAA67_R10_Guppy_SUP	Guppy	R10	SUP	med1.7	3318948	10033927	42	62.14	9165	44	926	23
bursta	ATCCBAA67_R10_Rerio_SUP	Rerio	R10	SUP	flye	3318936	9823868	38	62.78	8935	55	924.2	24
bursta	ATCCBAA67_R9_Dorado_FAST_flye	Dorado	R9	FAST	flye	3318165	8774476	6	66.27	8263	267	896.3	24
bursta	ATCCBAA67_R9_Dorado_FAST	Dorado	R9	FAST	med1.7	3318949	8777264	6	66.27	7975	58	936.9	24
bursta	ATCCBAA67_R9_Dorado_HAC_flye	Dorado	R9	HAC	flye	3318304	8769958	6	66.28	8204	205	905.9	21
bursta	ATCCBAA67_R9_Dorado_HAC	Dorado	R9	HAC	med1.7	3318984	8772190	6	66.28	7989	51	935.6	21
bursta	ATCCBAA67_R9_Dorado_SUP_flye	Dorado	R9	SUP	flye	3318714	8766136	5	66.29	8025	84	929.8	18
bursta	ATCCBAA67_R9_Dorado_SUP	Dorado	R9	SUP	med1.7	3318963	8767060	5	66.29	7947	25	941.7	18
bursta	ATCCBAA67_R9_Guppy_FAST_flye	Guppy	R9	FAST	flye	3317992	8772292	7	66.27	8325	312	888.4	21
bursta	ATCCBAA67_R9_Guppy_FAST	Guppy	R9	FAST	med1.7	3318941	8775494	7	66.27	7985	56	936.3	21
bursta	ATCCBAA67_R9_Guppy_HAC_flye	Guppy	R9	HAC	flye	3318513	8770670	6	66.28	8072	128	923	21
bursta	ATCCBAA67_R9_Guppy_HAC	Guppy	R9	HAC	med1.7	3318992	8772299	6	66.28	7967	35	938.7	21
bursta	ATCCBAA67_R9_Guppy_SUP_flye	Guppy	R9	SUP	flye	3318721	8768266	5	66.29	7986	59	935	21
bursta	ATCCBAA67_R9_Guppy_SUP	Guppy	R9	SUP	med1.7	3318940	8769054	5	66.29	7937	19	943.5	21
bursta	ATCCBAA67_srp_R10_Dorado_FAST	Dorado	R10	FAST	srp	3318928	11175401	36	59.09	10607	216	878.1	31
bursta	ATCCBAA67_srp_R10_Dorado_HAC	Dorado	R10	HAC	srp	3318935	9772968	42	62.93	8863	43	927.6	21
bursta	ATCCBAA67_srp_R10_Dorado_SUP	Dorado	R10	SUP	srp	3318937	9885333	43	62.58	8995	37	928.5	21
bursta	ATCCBAA67_srp_R10_Guppy_FAST	Guppy	R10	FAST	srp	3318926	11165025	40	59.11	10615	236	873.6	33
bursta	ATCCBAA67_srp_R10_Guppy_HAC	Guppy	R10	HAC	srp	3318935	10097087	49	61.98	9212	48	921.9	22
bursta	ATCCBAA67_srp_R10_Guppy_SUP	Guppy	R10	SUP	srp	3318938	10033931	42	62.14	9168	40	926.2	23
bursta	ATCCBAA67_srp_R10_Rerio_SUP	Rerio	R10	SUP	srp	3318936	9823901	38	62.78	8916	42	926.4	24
bursta	ATCCBAA67_srp_R9_Dorado_FAST	Dorado	R9	FAST	srp	3318926	8777233	6	66.27	7936	13	943.8	24
bursta	ATCCBAA67_srp_R9_Dorado_HAC	Dorado	R9	HAC	srp	3318935	8772081	6	66.28	7936	13	943.7	21
bursta	ATCCBAA67_srp_R9_Dorado_SUP	Dorado	R9	SUP	srp	3318938	8766989	5	66.29	7937	13	943.5	18
bursta	ATCCBAA67_srp_R9_Guppy_FAST	Guppy	R9	FAST	srp	3318938	8775535	7	66.27	7933	12	944.6	21
bursta	ATCCBAA67_srp_R9_Guppy_HAC	Guppy	R9	HAC	srp	3318938	8772131	6	66.28	7934	13	943.7	21
bursta	ATCCBAA67_srp_R9_Guppy_SUP	Guppy	R9	SUP	srp	3318935	8769040	5	66.29	7934	13	944.3	21
bursta	GCF_001742165.1_ASM174216v1_genomic	Reference	Reference	Reference	Reference	3318880	8527947	3	66.42	7713	25	944.7	18
bursta	ATCCBAA67-R10-Dorado-SUP-5kHZ-med-2.0	Dorado-5kHz	R10	SUP5kHz	5kHz-med2.0	3318940	9489300	19	63.81	8571	16	940.2	23
bursta	ATCCBAA67-R10-Dorado-SUP-5kHZ-med-2.0	Dorado-5kHz	R10	SUP5kHz	5kHz-flye	3318940	9489303	19	63.81	8571	17	940.2	23
camjej	ATCC29428_illumina	Illumina	Illumina	Illumina	Illumina	153803	1619303	42	30.47	1649	8	896.4	3	2	99.8
camjej	ATCC29428_lrp_R10_Dorado_FAST	Dorado	R10	FAST	lrp	1515184	1636732	9	30.55	1666	11	896.9	9	3	100.0
camjej	ATCC29428_lrp_R10_Dorado_HAC	Dorado	R10	HAC	lrp	1515179	1636727	9	30.55	1660	10	900.3	9	3	100.0
camjej	ATCC29428_lrp_R10_Dorado_SUP	Dorado	R10	SUP	lrp	1515184	1636732	9	30.55	1659	10	901.2	9	3	100.0
camjej	ATCC29428_lrp_R10_Guppy_FAST	Guppy	R10	FAST	lrp	1515174	1636722	9	30.55	1660	9	899.6	9	3	100.0
camjej	ATCC29428_lrp_R10_Guppy_HAC	Guppy	R10	HAC	lrp	1515183	1636731	9	30.55	1656	9	902.5	9	3	100.0
camjej	ATCC29428_lrp_R10_Guppy_SUP	Guppy	R10	SUP	lrp	1515183	1636731	9	30.55	1659	10	900.8	9	3	100.0
camjej	ATCC29428_lrp_R10_Rerio_SUP	Rerio	R10	SUP	lrp	1515184	1636732	9	30.55	1657	9	902.3	9	3	100.0
camjej	ATCC29428_lrp_R9_Dorado_FAST	Dorado	R9	FAST	lrp	1217933	1635615	11	30.55	1655	8	902.2	9	3	100.0
camjej	ATCC29428_lrp_R9_Dorado_HAC	Dorado	R9	HAC	lrp	1515186	1636734	9	30.55	1656	8	902.8	9	3	100.0
camjej	ATCC29428_lrp_R9_Dorado_SUP	Dorado	R9	SUP	lrp	1515186	1636734	9	30.55	1656	8	902.8	9	3	100.0
camjej	ATCC29428_lrp_R9_Guppy_FAST	Guppy	R9	FAST	lrp	1217935	1635617	11	30.55	1655	8	902.2	9	3	100.0
camjej	ATCC29428_lrp_R9_Guppy_HAC	Guppy	R9	HAC	lrp	1217935	1635617	11	30.55	1655	8	902.2	9	3	100.0
camjej	ATCC29428_lrp_R9_Guppy_SUP	Guppy	R9	SUP	lrp	1217935	1635617	11	30.55	1655	8	902.2	9	3	100.0
camjej	ATCC29428_R10_Dorado_FAST	Dorado	R10	FAST	med1.7	1638522	1688887	2	30.48	2283	365	658	9	207	61.2
camjej	ATCC29428_R10_Dorado_FAST_flye	Dorado	R10	FAST	flye	1637577	1687917	2	30.47	2955	699	487.5	9	111	32.7
camjej	ATCC29428_R10_Dorado_FAST_medaka_2_0	Dorado	R10	FAST	med2.0	1637736	1688083	2	30.49	2735	617	538.3	9	127	40.3
camjej	ATCC29428_R10_Dorado_HAC	Dorado	R10	HAC	med1.7	1638520	1688886	2	30.48	2139	289	705.2	9	228	68.1
camjej	ATCC29428_R10_Dorado_HAC_flye	Dorado	R10	HAC	flye	1638502	1688868	2	30.48	2175	311	692.8	9	220	65.1
camjej	ATCC29428_R10_Dorado_HAC_medaka_2_0	Dorado	R10	HAC	med2.0	1638443	1688806	2	30.48	2142	299	702.6	9	228	68.0
camjej	ATCC29428_R10_Dorado_SUP	Dorado	R10	SUP	med1.7	1638699	1689071	2	30.47	2046	218	740.9	9	263	76.5
camjej	ATCC29428_R10_Dorado_SUP_flye	Dorado	R10	SUP	flye	1638687	1689057	2	30.47	2074	233	730.4	9	251	73.8
camjej	ATCC29428_R10_Dorado_SUP_medaka_2_0	Dorado	R10	SUP	med2.0	1638646	1689014	2	30.47	2047	225	740	9	260	76.3
camjej	ATCC29428_R10_Guppy_FAST	Guppy	R10	FAST	med1.7	1638484	1688852	2	30.48	2241	323	669.9	9	201	59.5
camjej	ATCC29428_R10_Guppy_FAST_flye	Guppy	R10	FAST	flye	1636974	1687298	2	30.48	3063	727	467.4	9	91	28.3
camjej	ATCC29428_R10_Guppy_FAST_medaka_2_0	Guppy	R10	FAST	med2.0	1637394	1687723	2	30.49	2780	610	525.5	9	118	37.5
camjej	ATCC29428_R10_Guppy_HAC	Guppy	R10	HAC	med1.7	1638645	1689010	2	30.48	2128	260	709.9	9	232	70.3
camjej	ATCC29428_R10_Guppy_HAC_flye	Guppy	R10	HAC	flye	1638673	1689039	2	30.48	2154	266	701.1	9	227	67.0
camjej	ATCC29428_R10_Guppy_HAC_medaka_2_0	Guppy	R10	HAC	med2.0	1638566	1688930	2	30.48	2117	271	713.3	9	235	69.7
camjej	ATCC29428_R10_Guppy_SUP	Guppy	R10	SUP	med1.7	1638647	1689018	2	30.47	2082	248	726.7	9	250	72.4
camjej	ATCC29428_R10_Guppy_SUP_flye	Guppy	R10	SUP	flye	1638656	1689027	2	30.48	2112	262	715.3	9	240	69.7
camjej	ATCC29428_R10_Guppy_SUP_medaka_2_0	Guppy	R10	SUP	med2.0	1638585	1688953	2	30.48	2094	253	722.2	9	248	72.7
camjej	ATCC29428_R9_Dorado_FAST	Dorado	R9	FAST	med1.7	1639655	1690057	2	30.45	2544	511	589.9	9	167	51.5
camjej	ATCC29428_R9_Dorado_FAST_flye	Dorado	R9	FAST	flye	1635455	1685775	2	30.51	3506	841	387.2	9	46	16.8
camjej	ATCC29428_R9_Dorado_HAC	Dorado	R9	HAC	med1.7	1640531	1690945	2	30.44	2445	444	623.7	9	172	53.4
camjej	ATCC29428_R9_Dorado_HAC_flye	Dorado	R9	HAC	flye	1637971	1688342	2	30.48	2671	544	555.4	9	117	39.2
camjej	ATCC29428_R9_Dorado_SUP	Dorado	R9	SUP	med1.7	1639850	1690252	2	30.45	2213	318	692.5	9	214	64.8
camjej	ATCC29428_R9_Dorado_SUP_flye	Dorado	R9	SUP	flye	1638414	1688792	2	30.47	2377	409	629.9	9	168	52.0
camjej	ATCC29428_R9_Guppy_FAST	Guppy	R9	FAST	med1.7	1639550	1689937	2	30.46	2493	499	603.3	9	168	50.5
camjej	ATCC29428_R9_Guppy_FAST_flye	Guppy	R9	FAST	flye	1634594	1684896	2	30.53	3697	880	358.8	9	34	13.2
camjej	ATCC29428_R9_Guppy_HAC	Guppy	R9	HAC	med1.7	1640414	1690813	2	30.44	2901	723	509	9	107	33.9
camjej	ATCC29428_R9_Guppy_HAC_flye	Guppy	R9	HAC	flye	1638241	1688620	2	30.47	2526	493	591.2	9	143	45.5
camjej	ATCC29428_R9_Guppy_SUP	Guppy	R9	SUP	med1.7	1638999	1689366	2	30.46	2764	631	531.8	9	121	38.3
camjej	ATCC29428_R9_Guppy_SUP_flye	Guppy	R9	SUP	flye	1638500	1688870	2	30.47	2150	288	703.4	9	228	67.2
camjej	ATCC29428_Rerio_SUP	Rerio	R10	SUP	flye	1639077	1689455	2	30.46	1829	87	840.6	9	313	90.3
camjej	ATCC29428_srp_R10_Dorado_FAST	Dorado	R10	FAST	srp	1639225	1689590	2	30.46	1748	36	882	9	9	99.5
camjej	ATCC29428_srp_R10_Dorado_HAC	Dorado	R10	HAC	srp	1639241	1689607	2	30.46	1742	28	885.7	9	9	99.5
camjej	ATCC29428_srp_R10_Dorado_SUP	Dorado	R10	SUP	srp	1639230	1689602	2	30.46	1734	23	889.6	9	9	99.5
camjej	ATCC29428_srp_R10_Guppy_FAST	Guppy	R10	FAST	srp	1639258	1689626	2	30.46	1744	26	883.7	9	9	99.7
camjej	ATCC29428_srp_R10_Guppy_HAC	Guppy	R10	HAC	srp	1639223	1689588	2	30.46	1737	27	888.6	9	9	99.5
camjej	ATCC29428_srp_R10_Guppy_SUP	Guppy	R10	SUP	srp	1639218	1689589	2	30.46	1736	23	888.7	9	9	99.5
camjej	ATCC29428_srp_R10_Rerio_SUP	Rerio	R10	SUP	srp	1639244	1689622	2	30.46	1716	10	901.3	9	10	99.8
camjej	ATCC29428_srp_R9_Dorado_FAST	Dorado	R9	FAST	srp	1639282	1689683	2	30.46	1760	36	875.1	9	9	99.4
camjej	ATCC29428_srp_R9_Dorado_HAC	Dorado	R9	HAC	srp	1639305	1689718	2	30.46	1750	31	881.9	9	10	99.7
camjej	ATCC29428_srp_R9_Dorado_SUP	Dorado	R9	SUP	srp	1639270	1689671	2	30.46	1733	19	890.6	9	10	99.8
camjej	ATCC29428_srp_R9_Guppy_FAST	Guppy	R9	FAST	srp	1639272	1689659	2	30.46	1746	29	882.5	9	10	99.7
camjej	ATCC29428_srp_R9_Guppy_HAC	Guppy	R9	HAC	srp	1639275	1689674	2	30.46	1765	47	872	9	10	99.5
camjej	ATCC29428_srp_R9_Guppy_SUP	Guppy	R9	SUP	srp	1639222	1689589	2	30.46	1766	38	869.3	9	10	99.5
camjej	ATCC700819_camjej_refseq	Reference	Reference	Reference	Reference	1641481	1641481	1	30.55	1658	8	907.2	9	0	100.0
camjej	ATCC29428-R10-Dorado-SUP-5kHz-med-2.0	Dorado-5kHz	R10	SUP5kHz	5kHz-med2.0	1639288	1689671	2	30.46	1716	12	901.5	9	348	98.9
camjej	ATCC29428-R10-Dorado-SUP-5kHz-med-2.0	Dorado-5kHz	R10	SUP5kHz	5kHz-flye	1639282	1689665	2	30.46	1716	13	901.5	9	348	98.9
entfae_r	803393-22-r-illumina	Illumina	Illumina	Illumina	Illumina	31365	2986464	322	37.67	2876	13	840	3	0	98.7
entfae_r	803393-22-r-lrp-R10-Dorado-FAST	Dorado	R10	FAST	lrp	2832425	3232366	13	37.71	3154	15	845.9	18	0	98.9
entfae_r	803393-22-r-lrp-R10-Dorado-HAC	Dorado	R10	HAC	lrp	2832425	3232311	13	37.71	3153	14	846.2	18	0	98.9
entfae_r	803393-22-r-lrp-R10-Dorado-SUP	Dorado	R10	SUP	lrp	2832425	3232311	13	37.71	3153	14	846.2	18	0	98.9
entfae_r	803393-22-r-lrp-R10-Guppy-FAST	Guppy	R10	FAST	lrp	2832199	3232432	13	37.71	3150	14	846.8	18	0	98.9
entfae_r	803393-22-r-lrp-R10-Guppy-HAC	Guppy	R10	HAC	lrp	2832285	3232064	14	37.71	3152	13	846.4	18	0	98.9
entfae_r	803393-22-r-lrp-R10-Guppy-SUP	Guppy	R10	SUP	lrp	2832425	3232658	13	37.71	3152	14	846.4	18	0	98.9
entfae_r	803393-22-r-lrp-R10-Rerio-SUP	Rerio	R10	SUP	lrp	2259719	3232530	34	37.71	3144	14	847.4	18	0	98.9
entfae_r	803393-22-r-lrp-R9-Dorado-FAST	Dorado	R9	FAST	lrp	1828701	3228513	36	37.71	3146	14	845.6	18	0	98.9
entfae_r	803393-22-r-lrp-R9-Dorado-HAC	Dorado	R9	HAC	lrp	1828701	3228513	36	37.71	3146	14	845.6	18	0	98.9
entfae_r	803393-22-r-lrp-R9-Dorado-SUP	Dorado	R9	SUP	lrp	1828893	3228180	35	37.71	3144	14	846.8	18	0	98.9
entfae_r	803393-22-r-lrp-R9-Guppy-FAST	Guppy	R9	FAST	lrp	1827893	3227190	36	37.71	3144	14	846.4	18	0	98.9
entfae_r	803393-22-r-lrp-R9-Guppy-HAC	Guppy	R9	HAC	lrp	701992	3236922	62	37.7	3149	16	845.9	18	0	98.9
entfae_r	803393-22-r-lrp-R9-Guppy-SUP	Guppy	R9	SUP	lrp	1829136	3229223	35	37.71	3142	13	847.6	18	0	98.9
entfae_r	803393-22-r-R10-Dorado-FAST	Dorado	R10	FAST	med1.7	2843947	3289589	22	37.67	3281	57	823.7	21	6	96.6
entfae_r	803393-22-r-R10-Dorado-FAST-flye	Dorado	R10	FAST	flye	2841711	3287023	22	37.67	4296	570	622.1	21	43	57.3
entfae_r	803393-22-r-R10-Dorado-FAST-Medaka-2.0	Dorado	R10	FAST	med2.0	2841711	3287023	22	37.67	4297	570	621.9	21	43	57.3
entfae_r	803393-22-r-R10-Dorado-HAC	Dorado	R10	HAC	med1.7	809667	3181536	21	37.75	3114	20	840.2	18	0	98.8
entfae_r	803393-22-r-R10-Dorado-HAC-flye	Dorado	R10	HAC	flye	921384	3187346	17	37.73	3144	36	834.9	18	0	98.0
entfae_r	803393-22-r-R10-Dorado-HAC-Medaka-2.0	Dorado	R10	HAC	med2.0	809665	3181424	21	37.76	3113	23	840.2	18	0	98.7
entfae_r	803393-22-r-R10-Dorado-SUP	Dorado	R10	SUP	med1.7	809665	3181516	21	37.75	3108	17	841.8	18	0	98.8
entfae_r	803393-22-r-R10-Dorado-SUP-flye	Dorado	R10	SUP	flye	809663	3181590	21	37.75	3119	34	838.1	18	0	98.5
entfae_r	803393-22-r-R10-Dorado-SUP-Medaka-2.0	Dorado	R10	SUP	med2.0	809665	3181514	21	37.76	3113	25	840.2	18	0	98.8
entfae_r	803393-22-r-R10-Guppy-FAST	Guppy	R10	FAST	med1.7	2850679	3212534	13	37.72	3174	40	833.1	18	3	96.9
entfae_r	803393-22-r-R10-Guppy-FAST-flye	Guppy	R10	FAST	flye	2848340	3209989	13	37.72	4194	534	622.2	18	25	53.7
entfae_r	803393-22-r-R10-Guppy-FAST-Medaka-2.0	Guppy	R10	FAST	med2.0	2849443	3211107	13	37.73	3774	351	696.7	18	26	70.0
entfae_r	803393-22-r-R10-Guppy-HAC	Guppy	R10	HAC	med1.7	535100	3298422	23	37.7	3227	23	840.3	21	1	97.5
entfae_r	803393-22-r-R10-Guppy-HAC-flye	Guppy	R10	HAC	flye	535086	3298378	23	37.71	3251	28	834.9	21	1	96.4
entfae_r	803393-22-r-R10-Guppy-HAC-Medaka-2.0	Guppy	R10	HAC	med2.0	535099	3298355	23	37.71	3230	27	839.1	21	2	97.5
entfae_r	803393-22-r-R10-Guppy-SUP	Guppy	R10	SUP	med1.7	2273678	3256677	20	37.72	3175	15	843.6	21	0	98.9
entfae_r	803393-22-r-R10-Guppy-SUP-flye	Guppy	R10	SUP	flye	2273672	3256877	20	37.73	3199	33	836.3	21	0	98.8
entfae_r	803393-22-r-R10-Guppy-SUP-Medaka-2.0	Guppy	R10	SUP	med2.0	2273678	3256684	20	37.72	3170	14	844.7	21	0	98.9
entfae_r	803393-22-r-R10-Rerio-SUP	Rerio	R10	SUP	flye	925272	3167373	17	37.76	3107	28	839.6	18	0	98.8
entfae_r	803393-22-r-R9-Dorado-FAST	Dorado	R9	FAST	med1.7	549025	3166914	28	37.78	3140	47	830	21	1	96.3
entfae_r	803393-22-r-R9-Dorado-FAST-flye	Dorado	R9	FAST	flye	548123	3161472	28	37.82	4660	776	539.1	21	4	37.0
entfae_r	803393-22-r-R9-Dorado-HAC	Dorado	R9	HAC	med1.7	549071	3167211	28	37.77	3278	130	791.7	21	0	86.8
entfae_r	803393-22-r-R9-Dorado-HAC-flye	Dorado	R9	HAC	flye	462326	3153421	29	37.79	3914	472	649	18	2	58.5
entfae_r	803393-22-r-R9-Dorado-SUP	Dorado	R9	SUP	med1.7	690278	3165956	27	37.79	3131	36	832.6	21	0	96.4
entfae_r	803393-22-r-R9-Dorado-SUP-flye	Dorado	R9	SUP	flye	689950	3164341	27	37.8	3626	286	709.9	21	2	71.7
entfae_r	803393-22-r-R9-Guppy-FAST	Guppy	R9	FAST	med1.7	686781	3136161	28	37.85	3107	49	828.7	21	0	95.6
entfae_r	803393-22-r-R9-Guppy-FAST-flye	Guppy	R9	FAST	flye	685369	3129553	28	37.91	4924	947	500.8	21	3	29.2
entfae_r	803393-22-r-R9-Guppy-HAC	Guppy	R9	HAC	med1.7	462858	3167216	35	37.76	3115	30	836	18	0	97.3
entfae_r	803393-22-r-R9-Guppy-HAC-flye	Guppy	R9	HAC	flye	462393	3165178	35	37.79	3791	376	674.9	18	1	63.9
entfae_r	803393-22-r-R9-Guppy-SUP	Guppy	R9	SUP	med1.7	568048	3136364	29	37.81	3069	27	841.9	21	0	96.6
entfae_r	803393-22-r-R9-Guppy-SUP-flye	Guppy	R9	SUP	flye	567874	3135172	29	37.82	3292	179	779.5	21	2	81.2
entfae_r	803393-22-r-srp-R10-Dorado-FAST	Dorado	R10	FAST	srp	2844008	3289663	22	37.67	3222	15	840.1	21	0	98.9
entfae_r	803393-22-r-srp-R10-Dorado-HAC	Dorado	R10	HAC	srp	809668	3181503	21	37.75	3103	19	843.3	18	0	98.9
entfae_r	803393-22-r-srp-R10-Dorado-SUP	Dorado	R10	SUP	srp	809666	3181498	21	37.75	3103	19	843.3	18	0	98.9
entfae_r	803393-22-r-srp-R10-Guppy-FAST	Guppy	R10	FAST	srp	2850725	3212601	13	37.72	3139	16	843.2	18	0	98.8
entfae_r	803393-22-r-srp-R10-Guppy-HAC	Guppy	R10	HAC	srp	535100	3298359	23	37.71	3220	13	843.2	21	0	97.8
entfae_r	803393-22-r-srp-R10-Guppy-SUP	Guppy	R10	SUP	srp	2273678	3256664	20	37.72	3173	14	844.5	21	0	98.9
entfae_r	803393-22-r-srp-R10-Rerio-SUP	Rerio	R10	SUP	srp	925274	3167315	17	37.76	3099	24	842.3	18	0	98.9
entfae_r	803393-22-r-srp-R9-Dorado-FAST	Dorado	R9	FAST	srp	549031	3166972	28	37.78	3093	18	843.6	21	0	98.9
entfae_r	803393-22-r-srp-R9-Dorado-HAC	Dorado	R9	HAC	srp	549032	3166989	28	37.78	3085	17	843.8	21	0	98.9
entfae_r	803393-22-r-srp-R9-Dorado-SUP	Dorado	R9	SUP	srp	690296	3165945	27	37.79	3082	14	846.6	21	0	98.9
entfae_r	803393-22-r-srp-R9-Guppy-FAST	Guppy	R9	FAST	srp	686808	3136274	28	37.85	3050	17	844.9	21	0	98.9
entfae_r	803393-22-r-srp-R9-Guppy-HAC	Guppy	R9	HAC	srp	462853	3167163	35	37.76	3090	18	843.7	18	0	98.4
entfae_r	803393-22-r-srp-R9-Guppy-SUP	Guppy	R9	SUP	srp	568057	3136326	29	37.81	3045	16	849.3	21	0	98.0
entfae_s	609596-20-s-illumina	Illumina	Illumina	Illumina	Illumina	52580	2954514	243	37.66	2796	8	857.4	4	0	99.1
entfae_s	609596-20-s-lrp-R10-Dorado-FAST	Dorado	R10	FAST	lrp	2840218	3148130	7	37.73	3003	12	861.9	18	0	99.1
entfae_s	609596-20-s-lrp-R10-Dorado-HAC	Dorado	R10	HAC	lrp	2840811	3148723	7	37.73	3000	11	862.9	18	0	99.1
entfae_s	609596-20-s-lrp-R10-Dorado-SUP	Dorado	R10	SUP	lrp	2841492	3149404	7	37.73	2997	8	863.6	18	0	99.1
entfae_s	609596-20-s-lrp-R10-Guppy-FAST	Guppy	R10	FAST	lrp	2840809	3148392	7	37.73	3001	10	862.2	18	0	99.1
entfae_s	609596-20-s-lrp-R10-Guppy-HAC	Guppy	R10	HAC	lrp	2841148	3149060	7	37.73	2997	8	863.7	18	0	99.1
entfae_s	609596-20-s-lrp-R10-Guppy-SUP	Guppy	R10	SUP	lrp	2840996	3148768	7	37.73	2998	9	863.4	18	0	99.1
entfae_s	609596-20-s-lrp-R10-Rerio-SUP	Rerio	R10	SUP	lrp	2841330	3149242	7	37.73	2997	9	863.6	18	0	99.1
entfae_s	609596-20-s-lrp-R9-Dorado-FAST	Dorado	R9	FAST	lrp	2840555	3148467	7	37.73	2998	9	863.2	18	0	99.1
entfae_s	609596-20-s-lrp-R9-Dorado-HAC	Dorado	R9	HAC	lrp	2840555	3148467	7	37.73	2998	9	863.2	18	0	99.1
entfae_s	609596-20-s-lrp-R9-Dorado-SUP	Dorado	R9	SUP	lrp	2840205	3150186	8	37.73	3003	10	862.1	18	0	99.1
entfae_s	609596-20-s-lrp-R9-Guppy-FAST	Guppy	R9	FAST	lrp	2840780	3152604	14	37.73	3002	9	861.4	18	0	99.1
entfae_s	609596-20-s-lrp-R9-Guppy-HAC	Guppy	R9	HAC	lrp	2841714	3149094	7	37.74	2996	9	863.9	18	0	99.1
entfae_s	609596-20-s-lrp-R9-Guppy-SUP	Guppy	R9	SUP	lrp	2839800	3148592	8	37.73	2999	12	862.9	18	0	99.1
entfae_s	609596-20-s-R10-Dorado-FAST	Dorado	R10	FAST	med1.7	2839695	3197864	10	37.7	3103	36	843.9	18	0	96.1
entfae_s	609596-20-s-R10-Dorado-FAST-flye	Dorado	R10	FAST	flye	2837488	3195391	10	37.69	4167	578	622.1	18	0	55.5
entfae_s	609596-20-s-R10-Dorado-FAST-Medaka-2.0	Dorado	R10	FAST	med2.0	2837488	3195391	10	37.69	4168	578	621.9	18	0	55.5
entfae_s	609596-20-s-R10-Dorado-HAC	Dorado	R10	HAC	med1.7	1711710	3184659	11	37.69	3040	8	858.3	18	0	98.4
entfae_s	609596-20-s-R10-Dorado-HAC-flye	Dorado	R10	HAC	flye	2038720	3177529	12	37.72	3036	15	859.2	18	0	97.8
entfae_s	609596-20-s-R10-Dorado-HAC-Medaka-2.0	Dorado	R10	HAC	med2.0	0	0	0	0	0	0	0	0	0	0
entfae_s	609596-20-s-R10-Dorado-SUP	Dorado	R10	SUP	med1.7	1711713	3184652	11	37.69	3039	9	858.5	18	0	98.3
entfae_s	609596-20-s-R10-Dorado-SUP-flye	Dorado	R10	SUP	flye	1711698	3184635	11	37.69	3042	9	857.8	18	0	98.2
entfae_s	609596-20-s-R10-Dorado-SUP-Medaka-2.0	Dorado	R10	SUP	med2.0	1711710	3184657	11	37.69	3039	8	858.4	18	8	98.4
entfae_s	609596-20-s-R10-Guppy-FAST	Guppy	R10	FAST	med1.7	2839690	3187349	12	37.69	3094	41	844.3	18	0	95.9
entfae_s	609596-20-s-R10-Guppy-FAST-flye	Guppy	R10	FAST	flye	2837330	3184673	12	37.69	4148	551	621.2	18	0	52.9
entfae_s	609596-20-s-R10-Guppy-FAST-Medaka-2.0	Guppy	R10	FAST	med2.0	2838476	3185942	12	37.7	3659	338	709.1	18	0	70.6
entfae_s	609596-20-s-R10-Guppy-HAC	Guppy	R10	HAC	med1.7	2038769	3169999	15	37.73	3025	15	860.2	18	2	98.6
entfae_s	609596-20-s-R10-Guppy-HAC-flye	Guppy	R10	HAC	flye	2038725	3169906	15	37.73	3039	19	856.6	18	0	97.5
entfae_s	609596-20-s-R10-Guppy-HAC-Medaka-2.0	Guppy	R10	HAC	med2.0	2038766	3167131	15	37.74	3025	10	859.3	18	0	98.7
entfae_s	609596-20-s-R10-Guppy-SUP	Guppy	R10	SUP	med1.7	2779116	3135324	9	37.76	2994	13	859	18	0	98.7
entfae_s	609596-20-s-R10-Guppy-SUP-flye	Guppy	R10	SUP	flye	2779045	3135274	9	37.76	2997	13	858.1	18	0	98.4
entfae_s	609596-20-s-R10-Guppy-SUP-Medaka-2.0	Guppy	R10	SUP	med2.0	2779157	3135383	9	37.76	2989	9	860.1	18	1	98.9
entfae_s	609596-20-s-R10-Rerio-SUP	Rerio	R10	SUP	flye	1952575	3157131	15	37.74	3009	11	861.6	18	0	98.7
entfae_s	609596-20-s-R9-Dorado-FAST	Dorado	R9	FAST	med1.7	294998	3091545	22	37.83	2988	34	848.7	18	67	95.2
entfae_s	609596-20-s-R9-Dorado-FAST-flye	Dorado	R9	FAST	flye	294533	3086674	22	37.87	4478	744	547.7	18	0	36.8
entfae_s	609596-20-s-R9-Dorado-HAC	Dorado	R9	HAC	med1.7	295012	3091107	22	37.83	3087	96	817.4	18	67	87.9
entfae_s	609596-20-s-R9-Dorado-HAC-flye	Dorado	R9	HAC	flye	295071	3136343	36	37.84	3803	423	656.6	18	2	58.6
entfae_s	609596-20-s-R9-Dorado-SUP	Dorado	R9	SUP	med1.7	294948	3090856	22	37.84	3111	94	812.3	18	3	87.7
entfae_s	609596-20-s-R9-Dorado-SUP-flye	Dorado	R9	SUP	flye	294341	3113972	28	37.85	3460	258	724.8	18	2	71.4
entfae_s	609596-20-s-R9-Guppy-FAST	Guppy	R9	FAST	med1.7	316398	3079260	28	37.85	3006	43	831.9	18	23	94.2
entfae_s	609596-20-s-R9-Guppy-FAST-flye	Guppy	R9	FAST	flye	315728	3073450	28	37.92	4777	854	502	18	0	28.7
entfae_s	609596-20-s-R9-Guppy-HAC	Guppy	R9	HAC	med1.7	314771	3083873	30	37.83	2958	19	844.5	18	11	97
entfae_s	609596-20-s-R9-Guppy-HAC-flye	Guppy	R9	HAC	flye	314564	3080948	30	37.86	3555	339	692.9	18	0	64.9
entfae_s	609596-20-s-R9-Guppy-SUP	Guppy	R9	SUP	med1.7	313445	3074597	30	37.8	2961	22	842.3	18	18	97.4
entfae_s	609596-20-s-R9-Guppy-SUP-flye	Guppy	R9	SUP	flye	313347	3073548	30	37.82	3151	149	788.4	18	1	82.4
entfae_s	609596-20-s-srp-R10-Dorado-FAST	Dorado	R10	FAST	srp	2839743	3197958	10	37.7	3048	9	859.7	18	0	98.8
entfae_s	609596-20-s-srp-R10-Dorado-HAC	Dorado	R10	HAC	srp	1711715	3184668	11	37.69	3038	8	858.8	18	8	98.4
entfae_s	609596-20-s-srp-R10-Dorado-SUP	Dorado	R10	SUP	srp	1711713	3184664	11	37.69	3038	8	858.8	18	53	98.4
entfae_s	609596-20-s-srp-R10-Guppy-FAST	Guppy	R10	FAST	srp	2839748	3187454	12	37.69	3037	9	860.7	18	30	98.8
entfae_s	609596-20-s-srp-R10-Guppy-HAC	Guppy	R10	HAC	srp	2038777	3169990	15	37.73	3017	8	862.7	18	6	98.8
entfae_s	609596-20-s-srp-R10-Guppy-SUP	Guppy	R10	SUP	srp	2779113	3135324	9	37.76	2989	10	860.6	18	23	98.8
entfae_s	609596-20-s-srp-R10-Rerio-SUP	Rerio	R10	SUP	srp	1952579	3157120	15	37.74	3004	9	862.8	18	1	98.8
entfae_s	609596-20-s-srp-R9-Dorado-FAST	Dorado	R9	FAST	srp	295002	3091619	22	37.83	2947	8	861.4	18	13	98.9
entfae_s	609596-20-s-srp-R9-Dorado-HAC	Dorado	R9	HAC	srp	295002	3091005	22	37.83	2946	8	860.2	18	15	98.9
entfae_s	609596-20-s-srp-R9-Dorado-SUP	Dorado	R9	SUP	srp	295002	3091473	22	37.83	2947	8	860.6	18	1	98.9
entfae_s	609596-20-s-srp-R9-Guppy-FAST	Guppy	R9	FAST	srp	316417	3079405	28	37.85	2937	10	852.5	18	8	98.5
entfae_s	609596-20-s-srp-R9-Guppy-HAC	Guppy	R9	HAC	srp	314770	3083778	30	37.83	2934	9	853.5	18	0	98.4
entfae_s	609596-20-s-srp-R9-Guppy-SUP	Guppy	R9	SUP	srp	313450	3074544	30	37.8	2934	13	850.8	18	1	98.3
entfael	ATCC29212_Illumina	Illumina	Illumina	Illumina	Illumina	186226	3006784	67	37.3	2867	12	884.4	4	1	98.7
entfael	ATCC29212_lrp_R10_Dorado_FAST	Dorado	R10	FAST	lrp	2835079	3048192	9	37.35	2907	12	882.8	12	1	98.8
entfael	ATCC29212_lrp_R10_Dorado_HAC	Dorado	R10	HAC	lrp	2835080	3048193	9	37.35	2907	12	882.8	12	1	98.8
entfael	ATCC29212_lrp_R10_Dorado_SUP	Dorado	R10	SUP	lrp	2835080	3048193	9	37.35	2907	12	882.8	12	1	98.8
entfael	ATCC29212_lrp_R10_Guppy_FAST	Guppy	R10	FAST	lrp	2834889	3048002	9	37.35	2909	12	882	12	1	98.8
entfael	ATCC29212_lrp_R10_Guppy_HAC	Guppy	R10	HAC	lrp	2835080	3048193	9	37.35	2907	12	882.8	12	1	98.8
entfael	ATCC29212_lrp_R10_Guppy_SUP	Guppy	R10	SUP	lrp	2834963	3048076	9	37.35	2908	12	882.3	12	1	98.8
entfael	ATCC29212_lrp_R10_Rerio_SUP	Rerio	R10	SUP	lrp	2835080	3048193	9	37.35	2907	12	882.8	12	1	98.8
entfael	ATCC29212_lrp_R9_Dorado_FAST	Dorado	R9	FAST	lrp	2834932	3048045	9	37.35	2908	12	882.6	12	1	98.8
entfael	ATCC29212_lrp_R9_Dorado_HAC	Dorado	R9	HAC	lrp	2834933	3047895	9	37.35	2907	12	882.4	12	1	98.8
entfael	ATCC29212_lrp_R9_Dorado_SUP	Dorado	R9	SUP	lrp	2834004	3047117	9	37.35	2907	12	882.4	12	1	98.8
entfael	ATCC29212_lrp_R9_Guppy_FAST	Guppy	R9	FAST	lrp	2835080	3048193	9	37.35	2907	12	882.8	12	1	98.8
entfael	ATCC29212_lrp_R9_Guppy_HAC	Guppy	R9	HAC	lrp	2835080	3048043	9	37.35	2907	12	882.7	12	1	98.8
entfael	ATCC29212_lrp_R9_Guppy_SUP	Guppy	R9	SUP	lrp	2835079	3048075	9	37.35	2907	12	882.7	12	1	98.8
entfael	ATCC29212_R10_Dorado_FAST	Dorado	R10	FAST	med1.7	2940027	2985546	3	37.43	3508	336	717.8	12	321	68.8
entfael	ATCC29212_R10_Dorado_FAST_flye	Dorado	R10	FAST	flye	2936849	2982339	3	37.41	4805	923	513.3	12	176	33.3
entfael	ATCC29212_R10_Dorado_FAST_medaka_2_0	Dorado	R10	FAST	med2.0	2938023	2983524	3	37.44	4301	702	580	12	180	44.3
entfael	ATCC29212_R10_Dorado_HAC	Dorado	R10	HAC	med1.7	2940126	2985656	3	37.43	3218	187	783.7	12	168	80.3
entfael	ATCC29212_R10_Dorado_HAC_flye	Dorado	R10	HAC	flye	2939952	2985482	3	37.43	3289	223	766.8	12	180	77.1
entfael	ATCC29212_R10_Dorado_HAC_medaka_2_0	Dorado	R10	HAC	med2.0	2940204	2985734	3	37.44	3149	163	800.7	12	96	83.6
entfael	ATCC29212_R10_Dorado_SUP	Dorado	R10	SUP	med1.7	2940491	2982086	2	37.45	3017	99	835.2	12	110	90.0
entfael	ATCC29212_R10_Dorado_SUP_flye	Dorado	R10	SUP	flye	2940460	2982052	2	37.45	3037	107	829.6	12	104	89.1
entfael	ATCC29212_R10_Dorado_SUP_medaka_2_0	Dorado	R10	SUP	med2.0	2940568	2982163	2	37.45	2941	57	856.4	12	44	93.1
entfael	ATCC29212_R10_Guppy_FAST	Guppy	R10	FAST	med1.7	2940057	2985612	3	37.44	3491	339	721.8	12	311	69.5
entfael	ATCC29212_R10_Guppy_FAST_flye	Guppy	R10	FAST	flye	2936599	2982123	3	37.43	4853	940	506.1	12	153	31.3
entfael	ATCC29212_R10_Guppy_FAST_medaka_2_0	Guppy	R10	FAST	med2.0	2937755	2983290	3	37.46	4386	745	567.1	12	165	42.0
entfael	ATCC29212_R10_Guppy_HAC	Guppy	R10	HAC	med1.7	2940326	2985859	3	37.43	3249	203	777.2	12	230	78.6
entfael	ATCC29212_R10_Guppy_HAC_flye	Guppy	R10	HAC	flye	2940172	2985710	3	37.43	3312	228	761.7	12	239	75.7
entfael	ATCC29212_R10_Guppy_HAC_medaka_2_0	Guppy	R10	HAC	med2.0	2940312	2985846	3	37.44	3189	180	791.1	12	113	81.2
entfael	ATCC29212_R10_Guppy_SUP	Guppy	R10	SUP	med1.7	2940508	2986039	3	37.44	3031	93	832.7	12	105	90.0
entfael	ATCC29212_R10_Guppy_SUP_flye	Guppy	R10	SUP	flye	2940475	2986005	3	37.44	3048	102	827.7	12	116	89.0
entfael	ATCC29212_R10_Guppy_SUP_medaka_2_0	Guppy	R10	SUP	med2.0	2940578	2986111	3	37.44	2963	63	851.7	12	39	92.7
entfael	ATCC29212_R9_Dorado_FAST	Dorado	R9	FAST	med1.7	2942045	3018432	3	37.2	4166	629	606.9	12	288	49.3
entfael	ATCC29212_R9_Dorado_FAST_flye	Dorado	R9	FAST	flye	2936886	3013163	3	37.22	5210	993	470.2	12	144	25.5
entfael	ATCC29212_R9_Dorado_HAC	Dorado	R9	HAC	med1.7	2942780	3019205	3	37.26	4016	553	632.6	12	307	54.3
entfael	ATCC29212_R9_Dorado_HAC_flye	Dorado	R9	HAC	flye	2940005	3018466	3	37.23	4628	823	540.1	12	235	37.9
entfael	ATCC29212_R9_Dorado_SUP	Dorado	R9	SUP	med1.7	2942380	3018795	3	37.26	3975	540	639.8	12	328	55.1
entfael	ATCC29212_R9_Dorado_SUP_flye	Dorado	R9	SUP	flye	2940878	3017269	3	37.27	4227	661	596.8	12	295	47.6
entfael	ATCC29212_R9_Guppy_FAST	Guppy	R9	FAST	med1.7	1683440	3019510	6	37.19	4241	688	595.3	12	103	20.5
entfael	ATCC29212_R9_Guppy_FAST_flye	Guppy	R9	FAST	flye	1679764	3013152	6	37.23	5518	1142	436.7	12	253	47.3
entfael	ATCC29212_R9_Guppy_HAC	Guppy	R9	HAC	med1.7	1683612	3019870	6	37.18	4373	733	575.5	12	221	43.5
entfael	ATCC29212_R9_Guppy_HAC_flye	Guppy	R9	HAC	flye	2923499	3027392	5	37.22	4484	772	560.1	12	248	40.6
entfael	ATCC29212_R9_Guppy_SUP	Guppy	R9	SUP	med1.7	1682872	3018545	6	37.18	4338	705	578.9	12	255	44.9
entfael	ATCC29212_R9_Guppy_SUP_flye	Guppy	R9	SUP	flye	1546075	2960222	5	37.39	3866	510	643.6	12	363	54.7
entfael	ATCC29212_refseq	Reference	Reference	Reference	Reference	2939973	3048131	3	37.35	2935	23	875.8	12	0	97.4
entfael	ATCC29212_Rerio_SUP	Rerio	R10	SUP	flye	2940527	2986056	3	37.44	2957	63	852.3	12	74	92.6
entfael	ATCC29212_srp_R10_Dorado_FAST	Dorado	R10	FAST	srp	2940713	2986244	3	37.44	2840	11	887	12	1	98.7
entfael	ATCC29212_srp_R10_Dorado_HAC	Dorado	R10	HAC	srp	2940708	2986242	3	37.44	2840	11	887.6	12	1	98.8
entfael	ATCC29212_srp_R10_Dorado_SUP	Dorado	R10	SUP	srp	2940725	2982320	2	37.45	2834	11	888.1	12	1	98.8
entfael	ATCC29212_srp_R10_Guppy_FAST	Guppy	R10	FAST	srp	2940720	2986278	3	37.44	2839	11	888.2	12	1	98.8
entfael	ATCC29212_srp_R10_Guppy_HAC	Guppy	R10	HAC	srp	2940719	2986253	3	37.44	2836	11	888.4	12	1	98.8
entfael	ATCC29212_srp_R10_Guppy_SUP	Guppy	R10	SUP	srp	2940726	2986258	3	37.44	2837	11	888.5	12	1	98.8
entfael	ATCC29212_srp_R10_Rerio_SUP	Rerio	R10	SUP	srp	2940726	2986258	3	37.44	2835	11	888.9	12	1	98.8
entfael	ATCC29212_srp_R9_Dorado_FAST	Dorado	R9	FAST	srp	2940721	3017088	3	37.42	2882	15	883.9	12	3	98.4
entfael	ATCC29212_srp_R9_Dorado_HAC	Dorado	R9	HAC	srp	2940737	3017124	3	37.42	2877	15	884.6	12	1	98.8
entfael	ATCC29212_srp_R9_Dorado_SUP	Dorado	R9	SUP	srp	2940691	3017078	3	37.42	2875	12	885.5	12	1	98.8
entfael	ATCC29212_srp_R9_Guppy_FAST	Guppy	R9	FAST	srp	1682503	3017743	6	37.42	2892	23	880.7	12	1	98.4
entfael	ATCC29212_srp_R9_Guppy_HAC	Guppy	R9	HAC	srp	1682502	3017743	6	37.42	2889	19	881.8	12	2	98.4
entfael	ATCC29212_srp_R9_Guppy_SUP	Guppy	R9	SUP	srp	1682425	3017659	6	37.42	2887	18	882.8	12	2	98.4
entfael	ATCC29212-R10-Dorado-SUP-5kHz-med-2.0	Dorado-5kHz	R10	SUP5kHz	5kHz-med2.0	2940723	2982321	2	37.45	2835	11	887.9	12	1	98.8
entfael	ATCC29212-R10-Dorado-SUP-5kHz-med-2.0	Dorado-5kHz	R10	SUP5kHz	5kHz-flye	2940713	2982311	2	37.45	2834	11	887.8	12	1	98.8
esccol	ATCC25922_illumina	Illumina	Illumina	Illumina	Illumina	219565	5136296	196	50.38	4750	3	878.6	5	0	99.3
esccol	ATCC25922_lrp_R10_Dorado_FAST	Dorado	R10	FAST	lrp	5029389	5209183	9	50.42	4823	5	879.3	22	0	99.3
esccol	ATCC25922_lrp_R10_Dorado_HAC	Dorado	R10	HAC	lrp	5029390	5209212	9	50.42	4821	5	879.9	22	0	99.3
esccol	ATCC25922_lrp_R10_Dorado_SUP	Dorado	R10	SUP	lrp	5029205	5208999	9	50.42	4822	4	879.7	22	0	99.3
esccol	ATCC25922_lrp_R10_Guppy_FAST	Guppy	R10	FAST	lrp	5029390	5209163	9	50.42	4818	5	880.1	22	0	99.3
esccol	ATCC25922_lrp_R10_Guppy_HAC	Guppy	R10	HAC	lrp	5029390	5209201	9	50.42	4821	4	879.9	22	0	99.3
esccol	ATCC25922_lrp_R10_Guppy_SUP	Guppy	R10	SUP	lrp	5029390	5209201	9	50.42	4819	5	880.2	22	0	99.3
esccol	ATCC25922_lrp_R10_Rerio_SUP	Rerio	R10	SUP	lrp	5029390	5209209	9	50.42	4819	4	880.2	22	0	99.3
esccol	ATCC25922_lrp_R9_Dorado_FAST	Dorado	R9	FAST	lrp	5029390	5208944	9	50.42	4819	4	880.3	22	0	99.3
esccol	ATCC25922_lrp_R9_Dorado_HAC	Dorado	R9	HAC	lrp	2160726	5204785	39	50.42	4808	4	880	22	0	99.3
esccol	ATCC25922_lrp_R9_Dorado_SUP	Dorado	R9	SUP	lrp	2160189	5204131	39	50.42	4811	5	879.4	22	0	99.3
esccol	ATCC25922_lrp_R9_Guppy_FAST	Guppy	R9	FAST	lrp	2160726	5204785	39	50.42	4808	4	880.1	22	0	99.3
esccol	ATCC25922_lrp_R9_Guppy_HAC	Guppy	R9	HAC	lrp	2160726	5204785	39	50.42	4808	4	880	22	0	99.3
esccol	ATCC25922_lrp_R9_Guppy_SUP	Guppy	R9	SUP	lrp	2160726	5204785	39	50.42	4808	4	880	22	0	99.3
esccol	ATCC25922_R10_Dorado_FAST	Dorado	R10	FAST	med1.7	5131690	5234829	4	50.37	5346	93	797	22	96	85.7
esccol	ATCC25922_R10_Dorado_FAST_flye	Dorado	R10	FAST	flye	5124478	5227445	4	50.28	8386	1005	498.9	22	348	32.0
esccol	ATCC25922_R10_Dorado_FAST_medaka_2_0	Dorado	R10	FAST	med2.0	5126531	5229500	4	50.39	7394	642	571.9	22	154	45.6
esccol	ATCC25922_R10_Dorado_HAC	Dorado	R10	HAC	med1.7	5132111	5207944	5	50.42	4882	12	869.3	22	33	98.0
esccol	ATCC25922_R10_Dorado_HAC_flye	Dorado	R10	HAC	flye	5131851	5207675	5	50.42	4960	25	855.7	22	32	95.4
esccol	ATCC25922_R10_Dorado_HAC_medaka_2_0	Dorado	R10	HAC	med2.0	5132162	5207992	5	50.42	4848	7	875.4	22	8	98.9
esccol	ATCC25922_R10_Dorado_SUP	Dorado	R10	SUP	med1.7	5132248	5208759	4	50.42	4847	6	875.4	22	39	98.6
esccol	ATCC25922_R10_Dorado_SUP_flye	Dorado	R10	SUP	flye	5132196	5208705	4	50.42	4859	6	873.2	22	40	98.2
esccol	ATCC25922_R10_Dorado_SUP_medaka_2_0	Dorado	R10	SUP	med2.0	5132224	5208735	4	50.43	4825	3	879.2	22	7	99.2
esccol	ATCC25922_R10_Guppy_FAST	Guppy	R10	FAST	med1.7	5131833	5211501	5	50.43	5279	81	805.1	22	104	87.0
esccol	ATCC25922_R10_Guppy_FAST_flye	Guppy	R10	FAST	flye	5125620	5205145	5	50.3	8066	893	516.6	22	483	35.5
esccol	ATCC25922_R10_Guppy_FAST_medaka_2_0	Guppy	R10	FAST	med2.0	5127386	5206943	5	50.44	7114	544	592.9	22	171	49.3
esccol	ATCC25922_R10_Guppy_HAC	Guppy	R10	HAC	med1.7	5132156	5158971	3	50.48	4858	20	865	22	50	96.4
esccol	ATCC25922_R10_Guppy_HAC_flye	Guppy	R10	HAC	flye	5131917	5158729	3	50.47	4947	29	849.6	22	119	93.9
esccol	ATCC25922_R10_Guppy_HAC_medaka_2_0	Guppy	R10	HAC	med2.0	5132162	5158975	3	50.48	4789	10	877.4	22	15	98.4
esccol	ATCC25922_R10_Guppy_SUP	Guppy	R10	SUP	med1.7	5132258	5211943	6	50.42	4859	10	873.1	22	42	98.4
esccol	ATCC25922_R10_Guppy_SUP_flye	Guppy	R10	SUP	flye	5132198	5211881	6	50.42	4877	11	869.9	22	49	97.9
esccol	ATCC25922_R10_Guppy_SUP_medaka_2_0	Guppy	R10	SUP	med2.0	5132231	5211916	6	50.43	4833	7	877.7	22	5	99.0
esccol	ATCC25922_R10_Rerio_SUP	Rerio	R10	SUP	flye	5132211	5156395	2	50.48	4779	5	879.3	22	23	98.6
esccol	ATCC25922_R9_Dorado_FAST	Dorado	R9	FAST	med1.7	947037	5187592	15	50.46	4913	24	856.4	22	17	95.7
esccol	ATCC25922_R9_Dorado_FAST_flye	Dorado	R9	FAST	flye	946316	5183473	15	50.47	6308	298	663.6	22	40	62.1
esccol	ATCC25922_R9_Dorado_HAC	Dorado	R9	HAC	med1.7	858073	5215733	17	50.47	4838	9	875.7	22	7	98.8
esccol	ATCC25922_R9_Dorado_HAC_flye	Dorado	R9	HAC	flye	815212	5197741	18	50.49	5396	94	780.8	22	22	82.8
esccol	ATCC25922_R9_Dorado_SUP	Dorado	R9	SUP	med1.7	858059	5204234	16	50.48	4834	10	875.8	22	6	99.0
esccol	ATCC25922_R9_Dorado_SUP_flye	Dorado	R9	SUP	flye	857917	5203373	16	50.48	5121	43	826	22	18	90.4
esccol	ATCC25922_R9_Guppy_FAST	Guppy	R9	FAST	med1.7	910119	5197435	19	50.47	4953	30	852.1	22	21	95.7
esccol	ATCC25922_R9_Guppy_FAST_flye	Guppy	R9	FAST	flye	909202	5192286	19	50.49	6682	441	625.4	22	60	53.8
esccol	ATCC25922_R9_Guppy_HAC	Guppy	R9	HAC	med1.7	910078	5195759	19	50.47	5226	75	808	22	81	88.1
esccol	ATCC25922_R9_Guppy_HAC_flye	Guppy	R9	HAC	flye	821636	5188449	18	50.48	5281	71	797.3	22	28	85.9
esccol	ATCC25922_R9_Guppy_SUP	Guppy	R9	SUP	med1.7	909904	5196219	19	50.47	5385	99	783.1	22	70	82.7
esccol	ATCC25922_R9_Guppy_SUP_flye	Guppy	R9	SUP	flye	857967	5198205	22	50.45	4946	38	852	22	21	94.4
esccol	ATCC25922_srp_R10_Dorado_FAST	Dorado	R10	FAST	srp	5132200	5235404	4	50.37	4859	5	877.6	22	0	99.3
esccol	ATCC25922_srp_R10_Dorado_HAC	Dorado	R10	HAC	srp	5132218	5208047	5	50.42	4817	4	880.8	22	0	99.3
esccol	ATCC25922_srp_R10_Dorado_SUP	Dorado	R10	SUP	srp	5132220	5208731	4	50.43	4819	3	880.6	22	0	99.3
esccol	ATCC25922_srp_R10_Guppy_FAST	Guppy	R10	FAST	srp	5132220	5211897	5	50.42	4826	4	879.3	22	0	99.3
esccol	ATCC25922_srp_R10_Guppy_HAC	Guppy	R10	HAC	srp	5132217	5159032	3	50.48	4748	3	885.1	22	0	99.3
esccol	ATCC25922_srp_R10_Guppy_SUP	Guppy	R10	SUP	srp	5132219	5211903	6	50.42	4824	4	879.4	22	0	99.3
esccol	ATCC25922_srp_R10_Rerio_SUP	Rerio	R10	SUP	srp	5132220	5156405	2	50.48	4749	3	885.1	22	0	99.3
esccol	ATCC25922_srp_R9_Dorado_FAST	Dorado	R9	FAST	srp	947051	5187666	15	50.46	4795	4	877.7	22	0	99.3
esccol	ATCC25922_srp_R9_Dorado_HAC	Dorado	R9	HAC	srp	858061	5215648	17	50.47	4819	4	879	22	0	99.3
esccol	ATCC25922_srp_R9_Dorado_SUP	Dorado	R9	SUP	srp	858061	5204271	16	50.48	4812	4	879.5	22	0	99.3
esccol	ATCC25922_srp_R9_Guppy_FAST	Guppy	R9	FAST	srp	910154	5197641	19	50.47	4806	5	877.8	22	0	99.3
esccol	ATCC25922_srp_R9_Guppy_HAC	Guppy	R9	HAC	srp	910152	5196089	19	50.47	4810	5	876.7	22	0	99.3
esccol	ATCC25922_srp_R9_Guppy_SUP	Guppy	R9	SUP	srp	910148	5197627	19	50.47	4813	5	876.8	22	0	99.3
esccol	CP009072.1	Reference	Reference	Reference	Reference	5130767	5130767	1	50.54	4717	5	888.6	21	0	99.3
esccol	ATCC25922-R10-Dorado-SUP-5kHz-med-2.0	Dorado-5kHz	R10	SUP5kHz	5kHz-med2.0	1258232	5185593	15	50.41	4807	5	876.5	22	2	99.3
esccol	ATCC25922-R10-Dorado-SUP-5kHz-med-2.0	Dorado-5kHz	R10	SUP5kHz	5kHz-flye	1258233	5185544	15	50.41	4809	4	875.7	22	2	99.3
esccol_r	711854-19-r-illumina	Illumina	Illumina	Illumina	Illumina	186775	5227634	157	50.75	4649	9	864.5	4	0	99.2
esccol_r	711854-19-r-lrp-R10-Dorado-FAST	Dorado	R10	FAST	lrp	5103260	5306988	7	50.75	4692	8	864.1	22	0	99.2
esccol_r	711854-19-r-lrp-R10-Dorado-HAC	Dorado	R10	HAC	lrp	5102181	5305909	7	50.76	4692	8	862.5	22	0	99.2
esccol_r	711854-19-r-lrp-R10-Dorado-SUP	Dorado	R10	SUP	lrp	5102181	5305909	7	50.76	4692	8	862.5	22	0	99.2
esccol_r	711854-19-r-lrp-R10-Guppy-FAST	Guppy	R10	FAST	lrp	5103665	5307393	7	50.75	4692	8	862.6	22	0	99.2
esccol_r	711854-19-r-lrp-R10-Guppy-HAC	Guppy	R10	HAC	lrp	5102426	5306154	7	50.76	4694	8	863.7	22	0	99.2
esccol_r	711854-19-r-lrp-R10-Guppy-SUP	Guppy	R10	SUP	lrp	5102278	5306006	7	50.76	4692	8	863	22	0	99.2
esccol_r	711854-19-r-lrp-R10-Rerio-SUP	Rerio	R10	SUP	lrp	5102707	5306435	7	50.76	4692	8	863.1	22	0	99.2
esccol_r	711854-19-r-lrp-R9-Dorado-FAST	Dorado	R9	FAST	lrp	2654051	5304797	12	50.76	4692	8	863.1	22	0	99.2
esccol_r	711854-19-r-lrp-R9-Dorado-HAC	Dorado	R9	HAC	lrp	2654051	5304797	12	50.76	4692	8	863.1	22	0	99.2
esccol_r	711854-19-r-lrp-R9-Dorado-SUP	Dorado	R9	SUP	lrp	2655590	5306336	12	50.76	4692	8	863.1	22	0	99.2
esccol_r	711854-19-r-lrp-R9-Guppy-FAST	Guppy	R9	FAST	lrp	2655173	5305919	12	50.76	4692	8	862.8	22	0	99.2
esccol_r	711854-19-r-lrp-R9-Guppy-HAC	Guppy	R9	HAC	lrp	2655602	5306348	12	50.76	4692	8	862.9	22	0	99.2
esccol_r	711854-19-r-lrp-R9-Guppy-SUP	Guppy	R9	SUP	lrp	2655389	5306135	12	50.76	4692	8	863.2	22	0	99.2
esccol_r	711854-19-r-R10-Dorado-FAST	Dorado	R10	FAST	med1.7	5142229	5332397	5	50.74	5651	182	738.2	22	121	76.6
esccol_r	711854-19-r-R10-Dorado-FAST-flye	Dorado	R10	FAST	flye	5139676	5329684	5	50.63	8130	1006	558.3	22	512	43.2
esccol_r	711854-19-r-R10-Dorado-FAST-Medaka-2.0	Dorado	R10	FAST	med2.0	5139676	5329684	5	50.63	8131	1001	558.5	22	512	43.2
esccol_r	711854-19-r-R10-Dorado-HAC	Dorado	R10	HAC	med1.7	4413540	5318005	6	50.74	4696	11	859.1	22	6	98.6
esccol_r	711854-19-r-R10-Dorado-HAC-flye	Dorado	R10	HAC	flye	5143003	5318546	4	50.75	4809	25	840.6	22	29	95.9
esccol_r	711854-19-r-R10-Dorado-HAC-Medaka-2.0	Dorado	R10	HAC	med2.0	4413511	5317888	6	50.74	4700	13	859.4	22	7	98.8
esccol_r	711854-19-r-R10-Dorado-SUP	Dorado	R10	SUP	med1.7	4413529	5317976	6	50.74	4695	12	859.9	22	4	98.9
esccol_r	711854-19-r-R10-Dorado-SUP-flye	Dorado	R10	SUP	flye	4413527	5317986	6	50.74	4706	13	858.2	22	9	98.6
esccol_r	711854-19-r-R10-Dorado-SUP-Medaka-2.0	Dorado	R10	SUP	med2.0	4413531	5317992	6	50.74	4692	10	860.2	22	2	98.9
esccol_r	711854-19-r-R10-Guppy-FAST	Guppy	R10	FAST	med1.7	4282745	5316217	7	50.73	5609	194	734.9	22	158	77.0
esccol_r	711854-19-r-R10-Guppy-FAST-flye	Guppy	R10	FAST	flye	4281421	5314598	7	50.6	8120	964	553.9	22	586	44.4
esccol_r	711854-19-r-R10-Guppy-FAST-Medaka-2.0	Guppy	R10	FAST	med2.0	4280565	5313473	7	50.73	7596	754	604.8	22	208	53.2
esccol_r	711854-19-r-R10-Guppy-HAC	Guppy	R10	HAC	med1.7	5137013	5306998	4	50.75	4798	30	836.5	22	48	94.4
esccol_r	711854-19-r-R10-Guppy-HAC-flye	Guppy	R10	HAC	flye	5136981	5306960	4	50.75	4867	37	830.7	22	70	93.8
esccol_r	711854-19-r-R10-Guppy-HAC-Medaka-2.0	Guppy	R10	HAC	med2.0	5137016	5307000	4	50.76	4741	15	843.6	22	13	96.5
esccol_r	711854-19-r-R10-Guppy-SUP	Guppy	R10	SUP	med1.7	4413516	5321200	5	50.74	4704	14	857.8	22	6	98.6
esccol_r	711854-19-r-R10-Guppy-SUP-flye	Guppy	R10	SUP	flye	4413507	5321194	5	50.74	4719	16	856.7	22	10	98.4
esccol_r	711854-19-r-R10-Guppy-SUP-Medaka-2.0	Guppy	R10	SUP	med2.0	4413515	5321200	5	50.74	4696	10	860.2	22	2	99.0
esccol_r	711854-19-r-R10-Rerio-SUP	Rerio	R10	SUP	flye	1762375	5308002	8	50.75	4702	11	860.6	22	5	98.7
esccol_r	711854-19-r-R9-Dorado-FAST	Dorado	R9	FAST	med1.7	1344981	5319654	16	50.7	4858	36	730	22	492	75.9
esccol_r	711854-19-r-R9-Dorado-FAST-flye	Dorado	R9	FAST	flye	1343661	5314435	16	50.69	6333	327	579.3	22	291	47.5
esccol_r	711854-19-r-R9-Dorado-HAC	Dorado	R9	HAC	med1.7	1344762	5318828	16	50.69	4675	11	677.8	22	343	66.4
esccol_r	711854-19-r-R9-Dorado-HAC-flye	Dorado	R9	HAC	flye	3503762	5320236	12	50.65	5346	106	711.2	22	852	72.0
esccol_r	711854-19-r-R9-Dorado-SUP	Dorado	R9	SUP	med1.7	1344476	5317674	16	50.69	4687	12	660.8	22	373	63.7
esccol_r	711854-19-r-R9-Dorado-SUP-flye	Dorado	R9	SUP	flye	1611222	5316988	12	50.69	4971	46	781.4	22	779	84.5
esccol_r	711854-19-r-R9-Guppy-FAST	Guppy	R9	FAST	med1.7	4010123	5323644	9	50.73	4843	38	744.2	22	361	79.3
esccol_r	711854-19-r-R9-Guppy-FAST-flye	Guppy	R9	FAST	flye	4005888	5317940	9	50.73	6652	414	571.3	22	210	45.4
esccol_r	711854-19-r-R9-Guppy-HAC	Guppy	R9	HAC	med1.7	1566734	5332458	15	50.7	5180	87	791.8	22	722	87.4
esccol_r	711854-19-r-R9-Guppy-HAC-flye	Guppy	R9	HAC	flye	1566281	5330919	15	50.68	5228	79	733.9	22	749	76.0
esccol_r	711854-19-r-R9-Guppy-SUP	Guppy	R9	SUP	med1.7	1566760	5324126	17	50.7	5408	119	811	22	602	90.2
esccol_r	711854-19-r-R9-Guppy-SUP-flye	Guppy	R9	SUP	flye	1566587	5323277	17	50.7	4840	34	795.3	22	613	86.9
esccol_r	711854-19-r-srp-R10-Dorado-FAST	Dorado	R10	FAST	srp	5143213	5333462	5	50.75	4702	8	862.1	22	0	98.7
esccol_r	711854-19-r-srp-R10-Dorado-HAC	Dorado	R10	HAC	srp	4413545	5318010	6	50.74	4688	8	862.3	22	0	99.2
esccol_r	711854-19-r-srp-R10-Dorado-SUP	Dorado	R10	SUP	srp	4413542	5318002	6	50.74	4688	8	862	22	0	99.2
esccol_r	711854-19-r-srp-R10-Guppy-FAST	Guppy	R10	FAST	srp	4283294	5316977	7	50.74	4697	8	860.8	22	0	99.2
esccol_r	711854-19-r-srp-R10-Guppy-HAC	Guppy	R10	HAC	srp	5137194	5307198	4	50.76	4689	8	862.6	22	0	99.2
esccol_r	711854-19-r-srp-R10-Guppy-SUP	Guppy	R10	SUP	srp	4413541	5321237	5	50.74	4685	8	862.5	22	0	99.2
esccol_r	711854-19-r-srp-R10-Rerio-SUP	Rerio	R10	SUP	srp	1762381	5308016	8	50.75	4687	8	863.7	22	0	99.2
esccol_r	711854-19-r-srp-R9-Dorado-FAST	Dorado	R9	FAST	srp	1345288	5321083	16	50.76	4697	9	862.1	22	0	99.2
esccol_r	711854-19-r-srp-R9-Dorado-HAC	Dorado	R9	HAC	srp	1345282	5321081	16	50.76	4649	8	862.2	22	0	99.2
esccol_r	711854-19-r-srp-R9-Dorado-SUP	Dorado	R9	SUP	srp	1345278	5321075	16	50.76	4654	8	861.9	22	0	99.2
esccol_r	711854-19-r-srp-R9-Guppy-FAST	Guppy	R9	FAST	srp	4010837	5324664	9	50.77	4675	8	860.9	22	0	99.2
esccol_r	711854-19-r-srp-R9-Guppy-HAC	Guppy	R9	HAC	srp	1566929	5333240	15	50.76	4678	9	859.8	22	0	99.2
esccol_r	711854-19-r-srp-R9-Guppy-SUP	Guppy	R9	SUP	srp	1566928	5324795	17	50.76	4675	9	859.8	22	0	99.2
esccol_s	2022888879-4-s-illumina	Illumina	Illumina	Illumina	Illumina	305083	5022211	126	50.56	4649	9	885.5	4	0	99.1
esccol_s	2022888879-4-s-lrp-R10-Dorado-FAST	Dorado	R10	FAST	lrp	5082614	5085313	2	50.6	4692	8	892.8	22	0	99.1
esccol_s	2022888879-4-s-lrp-R10-Dorado-HAC	Dorado	R10	HAC	lrp	5082614	5085313	2	50.6	4692	8	892.8	22	0	99.1
esccol_s	2022888879-4-s-lrp-R10-Dorado-SUP	Dorado	R10	SUP	lrp	5082614	5085313	2	50.6	4692	8	892.8	22	0	99.1
esccol_s	2022888879-4-s-lrp-R10-Guppy-FAST	Guppy	R10	FAST	lrp	5082614	5085313	2	50.6	4692	8	892.8	22	0	99.1
esccol_s	2022888879-4-s-lrp-R10-Guppy-HAC	Guppy	R10	HAC	lrp	5082573	5085272	2	50.6	4694	8	892.5	22	0	99.1
esccol_s	2022888879-4-s-lrp-R10-Guppy-SUP	Guppy	R10	SUP	lrp	5082614	5085313	2	50.6	4692	8	892.8	22	0	99.1
esccol_s	2022888879-4-s-lrp-R10-Rerio-SUP	Rerio	R10	SUP	lrp	5082614	5085313	2	50.6	4692	8	892.8	22	0	99.1
esccol_s	2022888879-4-s-lrp-R9-Dorado-FAST	Dorado	R9	FAST	lrp	5082614	5085313	2	50.6	4692	8	892.8	22	0	99.1
esccol_s	2022888879-4-s-lrp-R9-Dorado-HAC	Dorado	R9	HAC	lrp	5082614	5085313	2	50.6	4692	8	892.8	22	0	99.1
esccol_s	2022888879-4-s-lrp-R9-Dorado-SUP	Dorado	R9	SUP	lrp	5082614	5085313	2	50.6	4692	8	892.8	22	0	99.1
esccol_s	2022888879-4-s-lrp-R9-Guppy-FAST	Guppy	R9	FAST	lrp	5082614	5085313	2	50.6	4692	8	892.8	22	0	99.1
esccol_s	2022888879-4-s-lrp-R9-Guppy-HAC	Guppy	R9	HAC	lrp	5082614	5085313	2	50.6	4692	8	892.8	22	0	99.1
esccol_s	2022888879-4-s-lrp-R9-Guppy-SUP	Guppy	R9	SUP	lrp	5082614	5085313	2	50.6	4692	8	892.8	22	0	99.1
esccol_s	2022888879-4-s-R10-Dorado-FAST	Dorado	R10	FAST	med1.7	3138994	5095162	7	50.6	5651	182	739.7	22	151	74.3
esccol_s	2022888879-4-s-R10-Dorado-FAST-flye	Dorado	R10	FAST	flye	3135478	5089427	7	50.53	8130	1006	502	22	370	32.5
esccol_s	2022888879-4-s-R10-Dorado-FAST-Medaka-2.0	Dorado	R10	FAST	med2.0	3135478	5089427	7	50.53	8131	1001	502	22	370	32.5
esccol_s	2022888879-4-s-R10-Dorado-HAC	Dorado	R10	HAC	med1.7	5082611	5082611	1	50.6	4696	11	892.2	22	15	99.1
esccol_s	2022888879-4-s-R10-Dorado-HAC-flye	Dorado	R10	HAC	flye	5082282	5085068	2	50.6	4809	25	870.2	22	33	96.1
esccol_s	2022888879-4-s-R10-Dorado-HAC-Medaka-2.0	Dorado	R10	HAC	med2.0	5082585	5082585	1	50.6	4700	13	891.2	22	5	98.7
esccol_s	2022888879-4-s-R10-Dorado-SUP	Dorado	R10	SUP	med1.7	5082608	5082608	1	50.6	4695	12	892.2	22	23	99.0
esccol_s	2022888879-4-s-R10-Dorado-SUP-flye	Dorado	R10	SUP	flye	5082578	5082578	1	50.6	4706	13	890.2	22	21	98.8
esccol_s	2022888879-4-s-R10-Dorado-SUP-Medaka-2.0	Dorado	R10	SUP	med2.0	5082613	5082613	1	50.6	4692	10	892.8	22	0	99.0
esccol_s	2022888879-4-s-R10-Guppy-FAST	Guppy	R10	FAST	med1.7	3334678	5086845	3	50.59	5609	194	742.9	22	190	74.8
esccol_s	2022888879-4-s-R10-Guppy-FAST-flye	Guppy	R10	FAST	flye	3331272	5081605	3	50.48	8120	964	502.9	22	426	33.2
esccol_s	2022888879-4-s-R10-Guppy-FAST-Medaka-2.0	Guppy	R10	FAST	med2.0	3331104	5081342	3	50.61	7596	754	539.3	22	195	38.6
esccol_s	2022888879-4-s-R10-Guppy-HAC	Guppy	R10	HAC	med1.7	5082168	5082168	1	50.6	4798	30	872.4	22	57	95.9
esccol_s	2022888879-4-s-R10-Guppy-HAC-flye	Guppy	R10	HAC	flye	5082292	5082292	1	50.59	4867	37	860.3	22	149	93.9
esccol_s	2022888879-4-s-R10-Guppy-HAC-Medaka-2.0	Guppy	R10	HAC	med2.0	5082532	5082532	1	50.6	4741	15	883.2	22	7	97.9
esccol_s	2022888879-4-s-R10-Guppy-SUP	Guppy	R10	SUP	med1.7	5082605	5082605	1	50.6	4704	14	890.3	22	38	98.9
esccol_s	2022888879-4-s-R10-Guppy-SUP-flye	Guppy	R10	SUP	flye	5082554	5082554	1	50.6	4719	16	887.5	22	42	98.6
esccol_s	2022888879-4-s-R10-Guppy-SUP-Medaka-2.0	Guppy	R10	SUP	med2.0	5082605	5082605	1	50.6	4696	10	892.2	22	2	99.1
esccol_s	2022888879-4-s-R10-Rerio-SUP	Rerio	R10	SUP	flye	5082576	5082576	1	50.6	4702	11	890.7	22	3	98.8
esccol_s	2022888879-4-s-R9-Dorado-FAST	Dorado	R9	FAST	med1.7	1121819	5088900	14	50.66	4858	36	860.1	22	10	94.4
esccol_s	2022888879-4-s-R9-Dorado-FAST-flye	Dorado	R9	FAST	flye	1120924	5084568	14	50.67	6333	327	655.3	22	22	56.0
esccol_s	2022888879-4-s-R9-Dorado-HAC	Dorado	R9	HAC	med1.7	630788	5045384	19	50.64	4675	11	886.8	22	1	98.2
esccol_s	2022888879-4-s-R9-Dorado-HAC-flye	Dorado	R9	HAC	flye	2716454	5078038	15	50.6	5346	106	779.1	22	29	79.9
esccol_s	2022888879-4-s-R9-Dorado-SUP	Dorado	R9	SUP	med1.7	630757	5049978	20	50.64	4687	12	885	22	6	98.0
esccol_s	2022888879-4-s-R9-Dorado-SUP-flye	Dorado	R9	SUP	flye	630657	5048990	20	50.64	4971	46	833.8	22	11	88.7
esccol_s	2022888879-4-s-R9-Guppy-FAST	Guppy	R9	FAST	med1.7	2564878	5060093	21	50.64	4843	38	858.6	22	11	93.6
esccol_s	2022888879-4-s-R9-Guppy-FAST-flye	Guppy	R9	FAST	flye	2562204	5054968	21	50.65	6652	414	618.5	22	37	49.2
esccol_s	2022888879-4-s-R9-Guppy-HAC	Guppy	R9	HAC	med1.7	2564773	5057615	21	50.64	5180	87	801.2	22	71	83.0
esccol_s	2022888879-4-s-R9-Guppy-HAC-flye	Guppy	R9	HAC	flye	998345	5093971	16	50.63	5228	79	799.4	22	19	83.8
esccol_s	2022888879-4-s-R9-Guppy-SUP	Guppy	R9	SUP	med1.7	2564190	5056356	21	50.64	5408	119	767.3	22	60	76.7
esccol_s	2022888879-4-s-R9-Guppy-SUP-flye	Guppy	R9	SUP	flye	755630	5083519	18	50.63	4840	34	862.8	22	9	94.2
esccol_s	2022888879-4-s-srp-R10-Dorado-FAST	Dorado	R10	FAST	srp	3139893	5096639	7	50.6	4702	8	891.7	22	0	99.1
esccol_s	2022888879-4-s-srp-R10-Dorado-HAC	Dorado	R10	HAC	srp	5082612	5082612	1	50.6	4688	8	893.4	22	0	99.1
esccol_s	2022888879-4-s-srp-R10-Dorado-SUP	Dorado	R10	SUP	srp	5082612	5082612	1	50.6	4688	8	893.4	22	0	99.1
esccol_s	2022888879-4-s-srp-R10-Guppy-FAST	Guppy	R10	FAST	srp	3335691	5088289	3	50.59	4697	8	891.8	22	0	99.1
esccol_s	2022888879-4-s-srp-R10-Guppy-HAC	Guppy	R10	HAC	srp	5082353	5082353	1	50.6	4689	8	893.1	22	0	99.1
esccol_s	2022888879-4-s-srp-R10-Guppy-SUP	Guppy	R10	SUP	srp	5082612	5082612	1	50.6	4685	8	894.2	22	0	99.1
esccol_s	2022888879-4-s-srp-R10-Rerio-SUP	Rerio	R10	SUP	srp	5082615	5082615	1	50.6	4687	8	893.5	22	0	99.1
esccol_s	2022888879-4-s-srp-R9-Dorado-FAST	Dorado	R9	FAST	srp	1121851	5089032	14	50.66	4697	9	889.9	22	0	99.0
esccol_s	2022888879-4-s-srp-R9-Dorado-HAC	Dorado	R9	HAC	srp	630779	5045277	19	50.64	4649	8	892.2	22	0	99.0
esccol_s	2022888879-4-s-srp-R9-Dorado-SUP	Dorado	R9	SUP	srp	630761	5050022	20	50.64	4654	8	892	22	0	99.0
esccol_s	2022888879-4-s-srp-R9-Guppy-FAST	Guppy	R9	FAST	srp	2565001	5060353	21	50.64	4675	8	890.4	22	0	99.0
esccol_s	2022888879-4-s-srp-R9-Guppy-HAC	Guppy	R9	HAC	srp	2565001	5058079	21	50.64	4678	9	889.3	22	0	99.0
esccol_s	2022888879-4-s-srp-R9-Guppy-SUP	Guppy	R9	SUP	srp	2564995	5057957	21	50.64	4675	9	889.9	22	0	99.0
klepne_s	607916-20-s-illumina	Illumina	Illumina	Illumina	Illumina	346410	5403260	94	57.39	4991	9	919.3	3	0	97.6
klepne_s	607916-20-s-lrp-R10-Dorado-FAST	Dorado	R10	FAST	lrp	4034080	5459146	13	57.34	5018	9	919.7	25	0	99.6
klepne_s	607916-20-s-lrp-R10-Dorado-HAC	Dorado	R10	HAC	lrp	4034133	5459199	13	57.34	5016	8	920	25	0	99.6
klepne_s	607916-20-s-lrp-R10-Dorado-SUP	Dorado	R10	SUP	lrp	4034133	5459199	13	57.34	5016	8	920	25	0	99.6
klepne_s	607916-20-s-lrp-R10-Guppy-FAST	Guppy	R10	FAST	lrp	4034133	5459199	13	57.34	5016	8	920	25	0	99.6
klepne_s	607916-20-s-lrp-R10-Guppy-HAC	Guppy	R10	HAC	lrp	4034133	5459199	13	57.34	5016	8	920	25	0	99.6
klepne_s	607916-20-s-lrp-R10-Guppy-SUP	Guppy	R10	SUP	lrp	4034133	5459199	13	57.34	5016	8	920	25	0	99.6
klepne_s	607916-20-s-lrp-R10-Rerio-SUP	Rerio	R10	SUP	lrp	5162473	5457519	3	57.34	5014	9	920.6	25	0	99.6
klepne_s	607916-20-s-lrp-R9-Dorado-FAST	Dorado	R9	FAST	lrp	4034132	5459198	13	57.34	5021	11	919.2	25	0	99.6
klepne_s	607916-20-s-lrp-R9-Dorado-HAC	Dorado	R9	HAC	lrp	4034132	5459198	13	57.34	5021	11	919.2	25	0	99.6
klepne_s	607916-20-s-lrp-R9-Dorado-SUP	Dorado	R9	SUP	lrp	5165505	5460551	3	57.34	5022	10	920	25	0	99.6
klepne_s	607916-20-s-lrp-R9-Guppy-FAST	Guppy	R9	FAST	lrp	4034127	5459193	13	57.34	5016	8	920	25	0	99.6
klepne_s	607916-20-s-lrp-R9-Guppy-HAC	Guppy	R9	HAC	lrp	5165505	5460551	3	57.34	5022	10	920	25	0	99.6
klepne_s	607916-20-s-lrp-R9-Guppy-SUP	Guppy	R9	SUP	lrp	5165505	5460551	3	57.34	5022	10	920	25	0	99.6
klepne_s	607916-20-s-R10-Dorado-FAST	Dorado	R10	FAST	med1.7	4018508	5439933	4	57.41	5644	130	805.6	25	127	82.1
klepne_s	607916-20-s-R10-Dorado-FAST-flye	Dorado	R10	FAST	flye	4016001	5436425	4	57.36	7588	692	584.4	25	451	44.7
klepne_s	607916-20-s-R10-Dorado-FAST-Medaka_2.0	Dorado	R10	FAST	med2.0	4016001	5436425	4	57.36	7586	694	584.4	25	451	44.7
klepne_s	607916-20-s-R10-Dorado-HAC	Dorado	R10	HAC	med1.7	1422250	5446864	7	57.39	4998	10	920.1	25	1	99.6
klepne_s	607916-20-s-R10-Dorado-HAC-flye	Dorado	R10	HAC	flye	4017901	5445659	3	57.39	5040	17	912	25	25	98.9
klepne_s	607916-20-s-R10-Dorado-SUP	Dorado	R10	SUP	med1.7	1422248	5446829	7	57.39	5000	9	919.6	25	13	99.6
klepne_s	607916-20-s-R10-Dorado-SUP-flye	Dorado	R10	SUP	flye	1422240	5446872	7	57.39	5008	13	918.4	25	10	99.5
klepne_s	607916-20-s-R10-Dorado-SUP-Medaka_2.0	Dorado	R10	SUP	med2.0	1422247	5446836	7	57.39	4995	9	920.6	25	0	99.6
klepne_s	607916-20-s-R10-Guppy-FAST	Guppy	R10	FAST	med1.7	4019169	5443352	3	57.39	5669	143	803.2	25	173	80.7
klepne_s	607916-20-s-R10-Guppy-FAST-flye	Guppy	R10	FAST	flye	4017281	5440724	3	57.3	7663	732	580.4	25	513	42.8
klepne_s	607916-20-s-R10-Guppy-FAST-Medaka_2.0	Guppy	R10	FAST	med2.0	4016904	5440122	3	57.39	7065	490	636.9	25	195	53.1
klepne_s	607916-20-s-R10-Guppy-HAC	Guppy	R10	HAC	med1.7	4018869	5446609	3	57.38	5058	22	908.5	25	22	98.7
klepne_s	607916-20-s-R10-Guppy-HAC-flye	Guppy	R10	HAC	flye	4018777	5446504	3	57.38	5076	23	905.2	25	43	98.3
klepne_s	607916-20-s-R10-Guppy-HAC-Medaka_2.0	Guppy	R10	HAC	med2.0	4018865	5446601	3	57.39	5036	13	913.4	25	5	98.9
klepne_s	607916-20-s-R10-Guppy-SUP	Guppy	R10	SUP	med1.7	4018652	5448543	4	57.38	5013	13	917.9	25	16	99.6
klepne_s	607916-20-s-R10-Guppy-SUP-flye	Guppy	R10	SUP	flye	4018657	5448548	4	57.38	5022	13	916.5	25	18	99.5
klepne_s	607916-20-s-R10-Guppy-SUP-Medaka_2.0	Guppy	R10	SUP	med2.0	4018647	5448534	4	57.38	5008	11	919.1	25	1	99.6
klepne_s	607916-20-s-R10-Rerio-SUP	Rerio	R10	SUP	flye	1013953	5439251	8	57.41	4995	10	918.6	25	4	99.5
klepne_s	607916-20-s-R9-Dorado-FAST	Dorado	R9	FAST	med1.7	1666761	5446486	4	57.4	5240	43	871.8	25	4	92.5
klepne_s	607916-20-s-R9-Dorado-FAST-flye	Dorado	R9	FAST	flye	1665586	5442658	4	57.4	6358	263	709.8	25	24	66.0
klepne_s	607916-20-s-R9-Dorado-HAC	Dorado	R9	HAC	med1.7	1666817	5446620	4	57.4	5371	67	848.6	25	23	89.1
klepne_s	607916-20-s-R9-Dorado-HAC-flye	Dorado	R9	HAC	flye	1666278	5434952	5	57.43	5528	69	822.9	25	15	85.2
klepne_s	607916-20-s-R9-Dorado-SUP	Dorado	R9	SUP	med1.7	1666485	5445558	4	57.4	5441	69	837.5	25	21	87.9
klepne_s	607916-20-s-R9-Dorado-SUP-flye	Dorado	R9	SUP	flye	1666415	5440543	5	57.41	5257	36	870.1	25	13	93.0
klepne_s	607916-20-s-R9-Guppy-FAST	Guppy	R9	FAST	med1.7	1666484	5445721	4	57.4	5289	61	863.5	25	12	91.6
klepne_s	607916-20-s-R9-Guppy-FAST-flye	Guppy	R9	FAST	flye	1665100	5441154	4	57.41	6652	351	675.1	25	43	57.3
klepne_s	607916-20-s-R9-Guppy-HAC	Guppy	R9	HAC	med1.7	1666854	5447928	5	57.4	5066	21	905.2	25	4	98.0
klepne_s	607916-20-s-R9-Guppy-HAC-flye	Guppy	R9	HAC	flye	1666391	5446436	5	57.4	5420	58	841.3	25	16	88.3
klepne_s	607916-20-s-R9-Guppy-SUP	Guppy	R9	SUP	med1.7	1666837	5443723	5	57.4	5011	14	916.2	25	5	99.1
klepne_s	607916-20-s-R9-Guppy-SUP-flye	Guppy	R9	SUP	flye	1666647	5443145	5	57.4	5112	22	896.5	25	16	96.8
klepne_s	607916-20-s-srp-R10-Dorado-FAST	Dorado	R10	FAST	srp	4018937	5440545	4	57.41	4993	8	919.5	25	0	99.6
klepne_s	607916-20-s-srp-R10-Dorado-HAC	Dorado	R10	HAC	srp	1422249	5446844	7	57.39	4998	9	920.6	25	0	99.6
klepne_s	607916-20-s-srp-R10-Dorado-SUP	Dorado	R10	SUP	srp	1422249	5446820	7	57.39	4996	10	920.6	25	0	99.6
klepne_s	607916-20-s-srp-R10-Guppy-FAST	Guppy	R10	FAST	srp	4019376	5443682	3	57.39	4996	9	920.6	25	0	99.6
klepne_s	607916-20-s-srp-R10-Guppy-HAC	Guppy	R10	HAC	srp	4018886	5446635	3	57.39	5001	10	920.4	25	0	99.6
klepne_s	607916-20-s-srp-R10-Guppy-SUP	Guppy	R10	SUP	srp	4018647	5448531	4	57.38	5011	10	919.4	25	0	99.6
klepne_s	607916-20-s-srp-R10-Rerio-SUP	Rerio	R10	SUP	srp	1013955	5439211	8	57.41	4987	8	920.6	25	0	99.6
klepne_s	607916-20-s-srp-R9-Dorado-FAST	Dorado	R9	FAST	srp	1666823	5446652	4	57.4	5005	12	919.5	25	0	99.6
klepne_s	607916-20-s-srp-R9-Dorado-HAC	Dorado	R9	HAC	srp	1666839	5446666	4	57.4	5002	9	920.1	25	0	99.6
klepne_s	607916-20-s-srp-R9-Dorado-SUP	Dorado	R9	SUP	srp	1666831	5446623	4	57.4	5005	10	919.5	25	0	99.6
klepne_s	607916-20-s-srp-R9-Guppy-FAST	Guppy	R9	FAST	srp	1666588	5446109	4	57.4	5006	11	919	25	0	99.6
klepne_s	607916-20-s-srp-R9-Guppy-HAC	Guppy	R9	HAC	srp	1666828	5447867	5	57.4	5002	9	919.6	25	0	99.6
klepne_s	607916-20-s-srp-R9-Guppy-SUP	Guppy	R9	SUP	srp	1666853	5443743	5	57.4	5000	10	920	25	0	99.6
klequa	ATCC700603_illumina	Illumina	Illumina	Illumina	Illumina	377642	5459048	118	57.78	5102	10	906.3	4	4	97.8
klequa	ATCC700603_lrp_R10_Dorado_FAST	Dorado	R10	FAST	lrp	5142283	5513597	5	57.73	5141	10	908.4	25	4	97.8
klequa	ATCC700603_lrp_R10_Dorado_HAC	Dorado	R10	HAC	lrp	5142281	5513595	5	57.73	5141	10	908.4	25	4	97.8
klequa	ATCC700603_lrp_R10_Dorado_SUP	Dorado	R10	SUP	lrp	5142283	5513597	5	57.73	5141	10	908.4	25	4	97.8
klequa	ATCC700603_lrp_R10_Guppy_FAST	Guppy	R10	FAST	lrp	5142286	5513600	5	57.73	5141	10	908.4	25	4	97.8
klequa	ATCC700603_lrp_R10_Guppy_HAC	Guppy	R10	HAC	lrp	5142284	5513598	5	57.73	5140	10	908.5	25	4	97.8
klequa	ATCC700603_lrp_R10_Guppy_SUP	Guppy	R10	SUP	lrp	5142282	5513596	5	57.73	5141	10	908.4	25	4	97.8
klequa	ATCC700603_lrp_R10_Rerio_SUP	Rerio	R10	SUP	lrp	5142283	5513597	5	57.73	5141	10	908.4	25	4	97.8
klequa	ATCC700603_lrp_R9_Dorado_FAST	Dorado	R9	FAST	lrp	4228004	5513538	7	57.73	5143	10	907.8	25	4	97.8
klequa	ATCC700603_lrp_R9_Dorado_HAC	Dorado	R9	HAC	lrp	4227603	5513542	9	57.73	5145	10	907.6	25	4	97.8
klequa	ATCC700603_lrp_R9_Dorado_SUP	Dorado	R9	SUP	lrp	4228004	5513544	7	57.73	5143	10	907.9	25	4	97.8
klequa	ATCC700603_lrp_R9_Guppy_FAST	Guppy	R9	FAST	lrp	4228004	5513533	7	57.73	5143	10	907.8	25	4	97.8
klequa	ATCC700603_lrp_R9_Guppy_HAC	Guppy	R9	HAC	lrp	4227603	5513534	9	57.73	5145	10	907.6	25	4	97.8
klequa	ATCC700603_lrp_R9_Guppy_SUP	Guppy	R9	SUP	lrp	4227603	5513535	9	57.73	5145	10	907.6	25	4	97.8
klequa	ATCC700603_R10_Dorado_FAST	Dorado	R10	FAST	med1.7	5283434	5512518	3	57.73	5936	184	775.4	25	102	76.6
klequa	ATCC700603_R10_Dorado_FAST_flye	Dorado	R10	FAST	flye	5279368	5508243	3	57.71	8138	890	551.2	25	316	38.8
klequa	ATCC700603_R10_Dorado_FAST_medaka_2_0	Dorado	R10	FAST	med2.0	5279373	5508273	3	57.75	7598	676	596.4	25	163	46
klequa	ATCC700603_R10_Dorado_HAC	Dorado	R10	HAC	med1.7	5284429	5513531	3	57.73	5195	19	897.2	25	5	97
klequa	ATCC700603_R10_Dorado_HAC_flye	Dorado	R10	HAC	flye	5284349	5513450	3	57.73	5207	22	894	25	7	96.2
klequa	ATCC700603_R10_Dorado_HAC_medaka_2_0	Dorado	R10	HAC	med2.0	5284510	5513610	3	57.73	5171	16	901.4	25	7	97.5
klequa	ATCC700603_R10_Dorado_SUP	Dorado	R10	SUP	med1.7	5284582	5513686	3	57.73	5144	13	906.8	25	0	97.8
klequa	ATCC700603_R10_Dorado_SUP_flye	Dorado	R10	SUP	flye	5284566	5513672	3	57.73	5147	14	905.7	25	0	97.7
klequa	ATCC700603_R10_Dorado_SUP_medaka_2_0	Dorado	R10	SUP	med2.0	5284600	5513706	3	57.73	5143	13	907.2	25	0	97.9
klequa	ATCC700603_R10_Guppy_FAST	Guppy	R10	FAST	med1.7	5283708	5512788	3	57.73	6074	187	758.6	25	134	75.3
klequa	ATCC700603_R10_Guppy_FAST_flye	Guppy	R10	FAST	flye	5280323	5509210	3	57.68	8226	956	544.5	25	381	37.9
klequa	ATCC700603_R10_Guppy_FAST_medaka_2_0	Guppy	R10	FAST	med2.0	5279769	5508650	3	57.75	7648	719	591.5	25	180	46.9
klequa	ATCC700603_R10_Guppy_HAC	Guppy	R10	HAC	med1.7	5284430	5513532	3	57.73	5232	24	890.5	25	19	95.6
klequa	ATCC700603_R10_Guppy_HAC_flye	Guppy	R10	HAC	flye	5284355	5513456	3	57.73	5262	28	885	25	27	94.8
klequa	ATCC700603_R10_Guppy_HAC_medaka_2_0	Guppy	R10	HAC	med2.0	5284494	5513599	3	57.74	5193	16	897.7	25	6	96.8
klequa	ATCC700603_R10_Guppy_SUP	Guppy	R10	SUP	med1.7	5284581	5513690	3	57.73	5154	14	905.2	25	1	97.8
klequa	ATCC700603_R10_Guppy_SUP_flye	Guppy	R10	SUP	flye	5284553	5513663	3	57.73	5153	18	904.7	25	0	97.6
klequa	ATCC700603_R10_Guppy_SUP_medaka_2_0	Guppy	R10	SUP	med2.0	5284599	5513710	3	57.73	5150	13	906.4	25	0	97.9
klequa	ATCC700603_R9_Dorado_FAST	Dorado	R9	FAST	med1.7	3582036	5503587	7	57.74	5249	32	885.2	25	0	94.3
klequa	ATCC700603_R9_Dorado_FAST_flye	Dorado	R9	FAST	flye	3578290	5497826	7	57.74	7009	452	650.7	25	13	52.1
klequa	ATCC700603_R9_Dorado_HAC	Dorado	R9	HAC	med1.7	2901695	5506222	10	57.75	5162	20	901.8	25	0	97.2
klequa	ATCC700603_R9_Dorado_HAC_flye	Dorado	R9	HAC	flye	2975348	5483372	9	57.77	6047	195	759.2	25	5	72.9
klequa	ATCC700603_R9_Dorado_SUP	Dorado	R9	SUP	med1.7	2901625	5506049	10	57.75	5163	22	901.9	25	0	97.4
klequa	ATCC700603_R9_Dorado_SUP_flye	Dorado	R9	SUP	flye	2900861	5504606	10	57.76	5604	88	827.9	25	5	85.6
klequa	ATCC700603_R9_Guppy_FAST	Guppy	R9	FAST	med1.7	2970793	5497353	13	57.77	5265	43	880.2	25	3	93.3
klequa	ATCC700603_R9_Guppy_FAST_flye	Guppy	R9	FAST	flye	2967082	5490535	13	57.79	7312	571	617	25	20	45.5
klequa	ATCC700603_R9_Guppy_HAC	Guppy	R9	HAC	med1.7	2970849	5497454	13	57.77	5404	77	855.9	25	22	88.6
klequa	ATCC700603_R9_Guppy_HAC_flye	Guppy	R9	HAC	flye	1484456	5483667	12	57.77	5848	149	786.5	25	7	77.7
klequa	ATCC700603_R9_Guppy_SUP	Guppy	R9	SUP	med1.7	2970243	5496263	13	57.78	5610	116	822.7	25	16	84.2
klequa	ATCC700603_R9_Guppy_SUP_flye	Guppy	R9	SUP	flye	1166412	5488911	17	57.76	5242	47	881	25	5	93
klequa	ATCC700603_refseq	Reference	Reference	Reference	Reference	5284734	5513862	3	57.73	5153	13	905.2	25	0	97.8
klequa	ATCC700603_Rerio_SUP	Rerio	R10	SUP	flye	5284561	5519920	3	57.72	5155	15	905.3	25	1	97.7
klequa	ATCC700603_srp_R10_Dorado_FAST	Dorado	R10	FAST	srp	5284598	5513706	3	57.73	5140	10	907.7	25	4	97.8
klequa	ATCC700603_srp_R10_Dorado_HAC	Dorado	R10	HAC	srp	5284599	5513708	3	57.73	5145	10	907.4	25	4	97.8
klequa	ATCC700603_srp_R10_Dorado_SUP	Dorado	R10	SUP	srp	5284601	5513710	3	57.73	5141	10	908.1	25	4	97.8
klequa	ATCC700603_srp_R10_Guppy_FAST	Guppy	R10	FAST	srp	5284608	5513717	3	57.73	5142	13	907.1	25	4	97.8
klequa	ATCC700603_srp_R10_Guppy_HAC	Guppy	R10	HAC	srp	5284584	5513693	3	57.73	5144	10	907.6	25	4	97.8
klequa	ATCC700603_srp_R10_Guppy_SUP	Guppy	R10	SUP	srp	5284603	5513712	3	57.73	5144	10	907.5	25	4	97.8
klequa	ATCC700603_srp_R10_Rerio_SUP	Rerio	R10	SUP	srp	5284602	5519970	3	57.72	5151	9	906.8	25	4	97.8
klequa	ATCC700603_srp_R9_Dorado_FAST	Dorado	R9	FAST	srp	3582164	5503785	7	57.74	5134	11	907.1	25	4	97.8
klequa	ATCC700603_srp_R9_Dorado_HAC	Dorado	R9	HAC	srp	2901649	5506115	10	57.75	5130	11	908.4	25	4	97.8
klequa	ATCC700603_srp_R9_Dorado_SUP	Dorado	R9	SUP	srp	2901645	5506103	10	57.75	5130	10	908.4	25	4	97.8
klequa	ATCC700603_srp_R9_Guppy_FAST	Guppy	R9	FAST	srp	2970985	5497742	13	57.77	5118	12	907.9	25	4	97.8
klequa	ATCC700603_srp_R9_Guppy_HAC	Guppy	R9	HAC	srp	2970984	5497741	13	57.77	5119	14	907.7	25	4	97.8
klequa	ATCC700603_srp_R9_Guppy_SUP	Guppy	R9	SUP	srp	2970983	5497736	13	57.77	5119	15	907.7	25	4	97.8
klequa	ATCC700603-R10-Dorado-SUP-5kHz-med-2.0	Dorado-5kHz	R10	SUP5kHz	5kHz-med2.0	3586593	5516944	8	57.73	5139	10	908.7	25	0	97.9
klequa	ATCC700603-R10-Dorado-SUP-5kHz-med-2.0	Dorado-5kHz	R10	SUP5kHz	5kHz-flye	3586591	5516942	8	57.73	5143	13	908	25	0	97.8
pseaer	ATCC27853_illumina	Illumina	Illumina	Illumina	Illumina	392468	6762148	185	66.18	6209	17	949.6	3	0	97.6
pseaer	ATCC27853_lrp_R10_Dorado_FAST	Dorado	R10	FAST	lrp	6794029	6814461	27	66.13	6266	19	953.6	12	10	98.5
pseaer	ATCC27853_lrp_R10_Dorado_HAC	Dorado	R10	HAC	lrp	6794032	6814464	27	66.13	6265	18	953.8	12	10	98.5
pseaer	ATCC27853_lrp_R10_Dorado_SUP	Dorado	R10	SUP	lrp	6794032	6814464	27	66.13	6265	18	953.8	12	10	98.5
pseaer	ATCC27853_lrp_R10_Guppy_FAST	Guppy	R10	FAST	lrp	6794030	6814462	27	66.13	6267	18	953.3	12	10	98.5
pseaer	ATCC27853_lrp_R10_Guppy_HAC	Guppy	R10	HAC	lrp	6794036	6814468	27	66.13	6264	18	953.8	12	10	98.5
pseaer	ATCC27853_lrp_R10_Guppy_SUP	Guppy	R10	SUP	lrp	6794032	6814464	27	66.13	6265	18	953.8	12	10	98.5
pseaer	ATCC27853_lrp_R10_Rerio_SUP	Rerio	R10	SUP	lrp	6794032	6814464	27	66.13	6265	18	953.8	12	10	98.5
pseaer	ATCC27853_lrp_R9_Dorado_FAST	Dorado	R9	FAST	lrp	6792749	6813181	27	66.13	6263	18	953.8	12	10	98.5
pseaer	ATCC27853_lrp_R9_Dorado_HAC	Dorado	R9	HAC	lrp	6792749	6813181	27	66.13	6263	18	953.8	12	10	98.5
pseaer	ATCC27853_lrp_R9_Dorado_SUP	Dorado	R9	SUP	lrp	6792749	6813181	27	66.13	6263	18	953.8	12	10	98.5
pseaer	ATCC27853_lrp_R9_Guppy_FAST	Guppy	R9	FAST	lrp	6792749	6813181	27	66.13	6263	18	953.8	12	10	98.5
pseaer	ATCC27853_lrp_R9_Guppy_HAC	Guppy	R9	HAC	lrp	6792749	6813181	27	66.13	6263	18	953.8	12	10	98.5
pseaer	ATCC27853_lrp_R9_Guppy_SUP	Guppy	R9	SUP	lrp	6792749	6813181	27	66.13	6263	18	953.8	12	10	98.5
pseaer	ATCC27853_R10_Dorado_FAST	Dorado	R10	FAST	med1.7	6832050	6846442	4	66.08	6614	173	897.2	12	55	87.8
pseaer	ATCC27853_R10_Dorado_FAST_flye	Dorado	R10	FAST	flye	6828049	6842430	4	66.11	7696	719	745.2	12	416	59.9
pseaer	ATCC27853_R10_Dorado_FAST_medaka_2_0	Dorado	R10	FAST	med2.0	6828621	6842931	4	66.09	7599	665	760.4	12	157	63.4
pseaer	ATCC27853_R10_Dorado_HAC	Dorado	R10	HAC	med1.7	6832828	6851998	5	66.08	6321	29	949.4	12	19	97.9
pseaer	ATCC27853_R10_Dorado_HAC_flye	Dorado	R10	HAC	flye	6832670	6851798	5	66.08	6350	38	944.1	12	30	96.7
pseaer	ATCC27853_R10_Dorado_HAC_medaka_2_0	Dorado	R10	HAC	med2.0	6832833	6851938	5	66.08	6320	32	949.3	12	13	97.8
pseaer	ATCC27853_R10_Dorado_SUP	Dorado	R10	SUP	med1.7	6832899	6865886	7	66.09	6314	25	952	12	18	98.2
pseaer	ATCC27853_R10_Dorado_SUP_flye	Dorado	R10	SUP	flye	6832892	6865889	7	66.09	6312	25	951.5	12	18	98.0
pseaer	ATCC27853_R10_Dorado_SUP_medaka_2_0	Dorado	R10	SUP	med2.0	6832917	6865918	7	66.09	6306	22	953.3	12	11	98.5
pseaer	ATCC27853_R10_Guppy_FAST	Guppy	R10	FAST	med1.7	6829560	6850750	4	66.11	6645	198	892.6	12	52	86.8
pseaer	ATCC27853_R10_Guppy_FAST_flye	Guppy	R10	FAST	flye	6825521	6846723	4	66.13	7797	743	738.8	12	395	58.7
pseaer	ATCC27853_R10_Guppy_FAST_medaka_2_0	Guppy	R10	FAST	med2.0	6825941	6847118	4	66.11	7702	685	752.7	12	164	61.9
pseaer	ATCC27853_R10_Guppy_HAC	Guppy	R10	HAC	med1.7	6832855	6851786	5	66.08	6327	29	946.8	12	20	97.5
pseaer	ATCC27853_R10_Guppy_HAC_flye	Guppy	R10	HAC	flye	6832756	6851591	5	66.08	6348	36	944.6	12	35	97.1
pseaer	ATCC27853_R10_Guppy_HAC_medaka_2_0	Guppy	R10	HAC	med2.0	6832856	6851762	5	66.08	6326	30	947.4	12	16	97.8
pseaer	ATCC27853_R10_Guppy_SUP	Guppy	R10	SUP	med1.7	6832911	6851768	5	66.08	6312	26	950.8	12	19	98.3
pseaer	ATCC27853_R10_Guppy_SUP_flye	Guppy	R10	SUP	flye	6832905	6851736	5	66.08	6315	23	950.5	12	21	98.2
pseaer	ATCC27853_R10_Guppy_SUP_medaka_2_0	Guppy	R10	SUP	med2.0	6832925	6851750	5	66.08	6299	23	952.8	12	12	98.4
pseaer	ATCC27853_R9_Dorado_FAST	Dorado	R9	FAST	med1.7	3641214	6820335	6	66.12	6333	38	941.2	12	17	96.5
pseaer	ATCC27853_R9_Dorado_FAST_flye	Dorado	R9	FAST	flye	3639763	6817762	6	66.12	6805	240	862.2	12	47	81.0
pseaer	ATCC27853_R9_Dorado_HAC	Dorado	R9	HAC	med1.7	3626055	6823155	4	66.11	6287	23	949.9	12	16	98.2
pseaer	ATCC27853_R9_Dorado_HAC_flye	Dorado	R9	HAC	flye	3624877	6821017	4	66.11	6655	173	885.6	12	26	85.6
pseaer	ATCC27853_R9_Dorado_SUP	Dorado	R9	SUP	med1.7	3626002	6823180	4	66.11	6281	20	951.2	12	12	98.4
pseaer	ATCC27853_R9_Dorado_SUP_flye	Dorado	R9	SUP	flye	3625608	6822414	4	66.11	6411	65	928.8	12	18	93.8
pseaer	ATCC27853_R9_Guppy_FAST	Guppy	R9	FAST	med1.7	3986351	6839951	4	66.09	6362	45	939.8	12	21	96.3
pseaer	ATCC27853_R9_Guppy_FAST_flye	Guppy	R9	FAST	flye	3984544	6836902	4	66.09	6861	287	855.5	12	58	78.5
pseaer	ATCC27853_R9_Guppy_HAC	Guppy	R9	HAC	med1.7	3986561	6840308	4	66.09	6395	90	929	12	31	93.1
pseaer	ATCC27853_R9_Guppy_HAC_flye	Guppy	R9	HAC	flye	3985650	6840309	5	66.09	6546	122	906.4	12	21	90.1
pseaer	ATCC27853_R9_Guppy_SUP	Guppy	R9	SUP	med1.7	3986184	6839630	4	66.09	6401	68	932.2	12	25	94.8
pseaer	ATCC27853_R9_Guppy_SUP_flye	Guppy	R9	SUP	flye	3986104	6839799	4	66.09	6350	53	939.8	12	18	95.7
pseaer	ATCC27853_Rerio_SUP	Rerio	R10	SUP	flye	6830144	6851372	4	66.11	6291	22	953.3	12	21	98.1
pseaer	ATCC27853_srp_R10_Dorado_FAST	Dorado	R10	FAST	srp	6832916	6847327	4	66.08	6299	22	952.7	12	10	98.5
pseaer	ATCC27853_srp_R10_Dorado_HAC	Dorado	R10	HAC	srp	6832926	6852055	5	66.08	6301	20	953	12	10	98.5
pseaer	ATCC27853_srp_R10_Dorado_SUP	Dorado	R10	SUP	srp	6832926	6865918	7	66.09	6305	20	953.5	12	10	98.5
pseaer	ATCC27853_srp_R10_Guppy_FAST	Guppy	R10	FAST	srp	6830414	6851644	4	66.11	6287	21	954.7	12	10	98.5
pseaer	ATCC27853_srp_R10_Guppy_HAC	Guppy	R10	HAC	srp	6832924	6851789	5	66.08	6307	21	951.3	12	10	98.5
pseaer	ATCC27853_srp_R10_Guppy_SUP	Guppy	R10	SUP	srp	6832926	6851763	5	66.08	6297	22	953.3	12	10	98.5
pseaer	ATCC27853_srp_R10_Rerio_SUP	Rerio	R10	SUP	srp	6830167	6851395	4	66.11	6279	20	955.5	12	10	98.5
pseaer	ATCC27853_srp_R9_Dorado_FAST	Dorado	R9	FAST	srp	3641320	6820590	6	66.12	6280	20	951.7	12	10	98.5
pseaer	ATCC27853_srp_R9_Dorado_HAC	Dorado	R9	HAC	srp	3626007	6823104	4	66.11	6280	20	951.6	12	10	98.5
pseaer	ATCC27853_srp_R9_Dorado_SUP	Dorado	R9	SUP	srp	3626006	6823179	4	66.11	6279	20	951.6	12	9	97.3
pseaer	ATCC27853_srp_R9_Guppy_FAST	Guppy	R9	FAST	srp	3986500	6840204	4	66.09	6301	22	950.5	12	10	98.5
pseaer	ATCC27853_srp_R9_Guppy_HAC	Guppy	R9	HAC	srp	3986499	6840204	4	66.09	6303	22	950	12	10	98.5
pseaer	ATCC27853_srp_R9_Guppy_SUP	Guppy	R9	SUP	srp	3986497	6840203	4	66.09	6301	21	950.3	12	10	98.5
pseaer	CP015117.1	Reference	Reference	Reference	Reference	6827737	6827737	1	66.11	6295	21	953.3	12	0	98.5
pseaer	ATCC27853-R10-Dorado-SUP-5kHz-med-2.0	Dorado-5kHz	R10	SUP5kHz	5kHz-med2.0	6839993	6839993	1	66.09	6295	22	952.8	12	10	98.5
pseaer	ATCC27853-R10-Dorado-SUP-5kHz-med-2.0	Dorado-5kHz	R10	SUP5kHz	5kHz-flye	6839990	6839990	1	66.09	6288	22	953.5	12	10	98.5
pseaer_r	503633-1-21-r-illumina	Illumina	Illumina	Illumina	Illumina	238791	6958653	243	66.03	6424	12	937.3	3	0	99.7
pseaer_r	503633-1-21-r-lrp-R10-Dorado-FAST	Dorado	R10	FAST	lrp	7045036	7045036	1	65.99	6497	13	946.9	12	0	99.7
pseaer_r	503633-1-21-r-lrp-R10-Dorado-HAC	Dorado	R10	HAC	lrp	7043348	7043348	1	65.99	6496	14	946.7	12	0	99.7
pseaer_r	503633-1-21-r-lrp-R10-Dorado-SUP	Dorado	R10	SUP	lrp	7043348	7043348	1	65.99	6496	14	946.7	12	0	99.7
pseaer_r	503633-1-21-r-lrp-R10-Guppy-FAST	Guppy	R10	FAST	lrp	7039420	7043297	9	65.99	6498	13	945.3	12	0	99.7
pseaer_r	503633-1-21-r-lrp-R10-Guppy-HAC	Guppy	R10	HAC	lrp	7045036	7045036	1	65.99	6497	13	946.9	12	0	99.7
pseaer_r	503633-1-21-r-lrp-R10-Guppy-SUP	Guppy	R10	SUP	lrp	7043741	7043741	1	65.99	6494	13	946.9	12	0	99.7
pseaer_r	503633-1-21-r-lrp-R10-Rerio-SUP	Rerio	R10	SUP	lrp	7043100	7043100	1	65.99	6496	13	946.9	12	0	99.7
pseaer_r	503633-1-21-r-lrp-R9-Dorado-FAST	Dorado	R9	FAST	lrp	7045035	7045035	1	65.99	6498	13	946.7	12	0	99.7
pseaer_r	503633-1-21-r-lrp-R9-Dorado-HAC	Dorado	R9	HAC	lrp	7045035	7045035	1	65.99	6498	13	946.7	12	0	99.7
pseaer_r	503633-1-21-r-lrp-R9-Dorado-SUP	Dorado	R9	SUP	lrp	7045036	7045036	1	65.99	6497	13	946.9	12	0	99.7
pseaer_r	503633-1-21-r-lrp-R9-Guppy-FAST	Guppy	R9	FAST	lrp	7045036	7045036	1	65.99	6497	13	946.9	12	0	99.7
pseaer_r	503633-1-21-r-lrp-R9-Guppy-HAC	Guppy	R9	HAC	lrp	7044664	7044664	1	65.99	6497	13	946.8	12	0	99.7
pseaer_r	503633-1-21-r-lrp-R9-Guppy-SUP	Guppy	R9	SUP	lrp	7045036	7045036	1	65.99	6497	13	946.9	12	0	99.7
pseaer_r	503633-1-21-r-R10-Dorado-FAST	Dorado	R10	FAST	med1.7	7044589	7050977	2	65.98	6638	93	921.5	12	52	93.3
pseaer_r	503633-1-21-r-R10-Dorado-FAST-flye	Dorado	R10	FAST	flye	7040363	7046756	2	65.99	7833	686	758.4	12	274	62.8
pseaer_r	503633-1-21-r-R10-Dorado-FAST-Medaka-2.0	Dorado	R10	FAST	med2.0	7040363	7046756	2	65.99	7833	686	758.4	12	274	62.8
pseaer_r	503633-1-21-r-R10-Dorado-HAC	Dorado	R10	HAC	med1.7	3901520	7034130	5	65.98	6499	17	943.3	12	20	99.6
pseaer_r	503633-1-21-r-R10-Dorado-HAC-flye	Dorado	R10	HAC	flye	7044905	7051309	2	65.98	6532	28	941	12	44	98.7
pseaer_r	503633-1-21-r-R10-Dorado-HAC-Medaka-2.0	Dorado	R10	HAC	med2.0	3901510	7034108	5	65.98	6498	15	943.9	12	1	99.7
pseaer_r	503633-1-21-r-R10-Dorado-SUP	Dorado	R10	SUP	med1.7	3901520	7034127	5	65.98	6502	19	943.9	12	33	99.5
pseaer_r	503633-1-21-r-R10-Dorado-SUP-flye	Dorado	R10	SUP	flye	3901512	7034126	5	65.98	6510	26	942.2	12	37	99.4
pseaer_r	503633-1-21-r-R10-Dorado-SUP-Medaka-2.0	Dorado	R10	SUP	med2.0	3901516	7034116	5	65.98	6498	15	943.7	12	1	99.6
pseaer_r	503633-1-21-r-R10-Guppy-FAST	Guppy	R10	FAST	med1.7	7044730	7051136	2	65.98	6605	66	926.5	12	216	66.4
pseaer_r	503633-1-21-r-R10-Guppy-FAST-flye	Guppy	R10	FAST	flye	7041072	7047469	2	65.99	7689	593	775.2	12	97	72.4
pseaer_r	503633-1-21-r-R10-Guppy-FAST-Medaka-2.0	Guppy	R10	FAST	med2.0	7041868	7048248	2	65.98	7493	489	801.4	12	35	95.5
pseaer_r	503633-1-21-r-R10-Guppy-HAC	Guppy	R10	HAC	med1.7	3901516	7034122	5	65.98	6504	22	942.2	12	49	98.6
pseaer_r	503633-1-21-r-R10-Guppy-HAC-flye	Guppy	R10	HAC	flye	3901484	7034051	5	65.98	6521	28	939.2	12	1	99.6
pseaer_r	503633-1-21-r-R10-Guppy-HAC-Medaka-2.0	Guppy	R10	HAC	med2.0	3901509	7034104	5	65.98	6496	18	943.9	12	38	99.1
pseaer_r	503633-1-21-r-R10-Guppy-SUP	Guppy	R10	SUP	med1.7	7045049	7051436	2	65.98	6504	15	945.9	12	50	99.4
pseaer_r	503633-1-21-r-R10-Guppy-SUP-flye	Guppy	R10	SUP	flye	7045044	7051448	2	65.98	6505	16	945.2	12	2	99.7
pseaer_r	503633-1-21-r-R10-Guppy-SUP-Medaka-2.0	Guppy	R10	SUP	med2.0	7045038	7051434	2	65.98	6499	13	947.2	12	39	99.5
pseaer_r	503633-1-21-r-R10-Rerio-SUP	Rerio	R10	SUP	flye	7045030	7051434	2	65.98	6504	15	945.5	12	14	99.6
pseaer_r	503633-1-21-r-R9-Dorado-FAST	Dorado	R9	FAST	med1.7	6987895	7093124	5	65.99	6585	33	938.2	12	8	98.3
pseaer_r	503633-1-21-r-R9-Dorado-FAST-flye	Dorado	R9	FAST	flye	7041812	7054614	3	65.98	7074	302	850.3	12	21	80.2
pseaer_r	503633-1-21-r-R9-Dorado-HAC	Dorado	R9	HAC	med1.7	6988048	7094341	5	65.99	6599	46	933.6	12	12	97.2
pseaer_r	503633-1-21-r-R9-Dorado-HAC-flye	Dorado	R9	HAC	flye	6963039	7062195	6	65.98	6883	177	881.4	12	34	86.1
pseaer_r	503633-1-21-r-R9-Dorado-SUP	Dorado	R9	SUP	med1.7	6987628	7093925	5	65.99	6593	41	934.9	12	11	97.9
pseaer_r	503633-1-21-r-R9-Dorado-SUP-flye	Dorado	R9	SUP	flye	6317955	7044166	5	65.98	6624	67	920.9	12	10	94.8
pseaer_r	503633-1-21-r-R9-Guppy-FAST	Guppy	R9	FAST	med1.7	7035719	7050890	4	66	6539	32	939.6	12	39	77.8
pseaer_r	503633-1-21-r-R9-Guppy-FAST-flye	Guppy	R9	FAST	flye	7032053	7047239	4	66	7142	349	837.9	12	9	97.9
pseaer_r	503633-1-21-r-R9-Guppy-HAC	Guppy	R9	HAC	med1.7	7034839	7047657	3	66	6525	23	941.8	12	19	90.5
pseaer_r	503633-1-21-r-R9-Guppy-HAC-flye	Guppy	R9	HAC	flye	7033429	7046247	3	66	6750	119	901	12	13	99.1
pseaer_r	503633-1-21-r-R9-Guppy-SUP	Guppy	R9	SUP	med1.7	3789753	7034270	9	65.97	6496	17	942.9	12	11	96.8
pseaer_r	503633-1-21-r-R9-Guppy-SUP-flye	Guppy	R9	SUP	flye	3789405	7033548	9	65.97	6534	44	934.2	12	3	99.4
pseaer_r	503633-1-21-r-srp-R10-Dorado-FAST	Dorado	R10	FAST	srp	7045021	7051427	2	65.98	6498	15	946.8	12	0	99.7
pseaer_r	503633-1-21-r-srp-R10-Dorado-HAC	Dorado	R10	HAC	srp	3901515	7034114	5	65.98	6496	13	944.2	12	0	99.7
pseaer_r	503633-1-21-r-srp-R10-Dorado-SUP	Dorado	R10	SUP	srp	3901515	7034113	5	65.98	6497	14	944.1	12	0	99.7
pseaer_r	503633-1-21-r-srp-R10-Guppy-FAST	Guppy	R10	FAST	srp	7045033	7051452	2	65.98	6500	14	946.9	12	0	99.7
pseaer_r	503633-1-21-r-srp-R10-Guppy-HAC	Guppy	R10	HAC	srp	3901515	7034116	5	65.98	6494	14	944.3	12	0	99.7
pseaer_r	503633-1-21-r-srp-R10-Guppy-SUP	Guppy	R10	SUP	srp	7045034	7051437	2	65.98	6498	14	947	12	0	99.7
pseaer_r	503633-1-21-r-srp-R10-Rerio-SUP	Rerio	R10	SUP	srp	7045034	7051438	2	65.98	6500	14	946.7	12	0	99.7
pseaer_r	503633-1-21-r-srp-R9-Dorado-FAST	Dorado	R9	FAST	srp	6988067	7093315	5	65.99	6557	15	944.1	12	0	99.7
pseaer_r	503633-1-21-r-srp-R9-Dorado-HAC	Dorado	R9	HAC	srp	6988068	7094311	5	65.99	6561	16	944	12	0	99.7
pseaer_r	503633-1-21-r-srp-R9-Dorado-SUP	Dorado	R9	SUP	srp	6988067	7094312	5	65.99	6558	14	944.4	12	0	99.7
pseaer_r	503633-1-21-r-srp-R9-Guppy-FAST	Guppy	R9	FAST	srp	7035925	7051083	4	66	6511	13	945.9	12	0	99.7
pseaer_r	503633-1-21-r-srp-R9-Guppy-HAC	Guppy	R9	HAC	srp	7034830	7047648	3	66	6511	13	945.3	12	0	99.7
pseaer_r	503633-1-21-r-srp-R9-Guppy-SUP	Guppy	R9	SUP	srp	3789764	7034281	9	65.97	6495	13	943.8	12	0	99.7
pseaer_s	713135-2-20-s-illumina	Illumina	Illumina	Illumina	Illumina	586161	6468493	1	66.35	5873	6	956.7	3	0	99.8
pseaer_s	713135-2-20-s-lrp-R10-Dorado-FAST	Dorado	R10	FAST	lrp	6522872	6522872	1	66.3	5931	8	966.3	12	0	99.8
pseaer_s	713135-2-20-s-lrp-R10-Dorado-HAC	Dorado	R10	HAC	lrp	6522872	6522872	1	66.3	5930	8	966.4	12	0	99.8
pseaer_s	713135-2-20-s-lrp-R10-Dorado-SUP	Dorado	R10	SUP	lrp	6522872	6522872	1	66.3	5930	8	966.4	12	0	99.8
pseaer_s	713135-2-20-s-lrp-R10-Guppy-FAST	Guppy	R10	FAST	lrp	6522872	6522872	1	66.3	5930	8	966.4	12	0	99.8
pseaer_s	713135-2-20-s-lrp-R10-Guppy-HAC	Guppy	R10	HAC	lrp	6522872	6522872	1	66.3	5930	8	966.4	12	0	99.8
pseaer_s	713135-2-20-s-lrp-R10-Guppy-SUP	Guppy	R10	SUP	lrp	6522872	6522872	1	66.3	5930	8	966.4	12	0	99.8
pseaer_s	713135-2-20-s-lrp-R10-Rerio-SUP	Rerio	R10	SUP	lrp	6522872	6522872	1	66.3	5930	8	966.4	12	0	99.8
pseaer_s	713135-2-20-s-lrp-R9-Dorado-FAST	Dorado	R9	FAST	lrp	6522385	6522385	1	66.3	5928	8	966.4	12	0	99.8
pseaer_s	713135-2-20-s-lrp-R9-Dorado-HAC	Dorado	R9	HAC	lrp	6522385	6522385	1	66.3	5928	8	966.4	12	0	99.8
pseaer_s	713135-2-20-s-lrp-R9-Dorado-SUP	Dorado	R9	SUP	lrp	6522872	6522872	2	66.3	5930	8	966.4	12	0	99.8
pseaer_s	713135-2-20-s-lrp-R9-Guppy-FAST	Guppy	R9	FAST	lrp	5779232	6517063	1	66.3	5921	8	966.7	12	0	99.8
pseaer_s	713135-2-20-s-lrp-R9-Guppy-HAC	Guppy	R9	HAC	lrp	6522871	6522871	1	66.3	5928	8	966.4	12	0	99.8
pseaer_s	713135-2-20-s-lrp-R9-Guppy-SUP	Guppy	R9	SUP	lrp	6522872	6522872	14	66.3	5930	8	966.4	12	0	99.8
pseaer_s	713135-2-20-s-R10-Dorado-FAST	Dorado	R10	FAST	med1.7	5707319	6516857	11	66.24	6233	233	886.9	12	386	81.1
pseaer_s	713135-2-20-s-R10-Dorado-FAST-flye	Dorado	R10	FAST	flye	5703776	6512908	14	66.24	7240	686	748.6	12	481	56.6
pseaer_s	713135-2-20-s-R10-Dorado-FAST-Medaka-2.0	Dorado	R10	FAST	med2.0	5703776	6512908	14	66.24	7242	683	748.6	12	481	56.6
pseaer_s	713135-2-20-s-R10-Dorado-HAC	Dorado	R10	HAC	med1.7	5706978	6511243	13	66.27	5948	45	953.3	12	113	95.8
pseaer_s	713135-2-20-s-R10-Dorado-HAC-flye	Dorado	R10	HAC	flye	5706976	6493469	13	66.32	6019	85	934.9	12	341	92.5
pseaer_s	713135-2-20-s-R10-Dorado-SUP	Dorado	R10	SUP	med1.7	5706970	6511178	15	66.27	5947	45	952.8	12	124	95.8
pseaer_s	713135-2-20-s-R10-Dorado-SUP-flye	Dorado	R10	SUP	flye	5706973	6511207	13	66.27	5962	51	951	12	132	95.6
pseaer_s	713135-2-20-s-R10-Dorado-SUP-Medaka-2.0	Dorado	R10	SUP	med2.0	5706908	6511089	13	66.27	5941	42	955.6	12	120	96.8
pseaer_s	713135-2-20-s-R10-Guppy-FAST	Guppy	R10	FAST	med1.7	5707244	6519573	14	66.23	6195	183	893.8	12	412	82.0
pseaer_s	713135-2-20-s-R10-Guppy-FAST-flye	Guppy	R10	FAST	flye	5704254	6516252	15	66.22	7138	596	763.4	12	477	60.1
pseaer_s	713135-2-20-s-R10-Guppy-FAST-Medaka-2.0	Guppy	R10	FAST	med2.0	5704576	6516459	15	66.23	6920	479	795.8	12	426	67.1
pseaer_s	713135-2-20-s-R10-Guppy-HAC	Guppy	R10	HAC	med1.7	5707474	6517069	13	66.24	6082	130	916	12	398	86.2
pseaer_s	713135-2-20-s-R10-Guppy-HAC-flye	Guppy	R10	HAC	flye	5707411	6517069	14	66.24	6092	137	913.6	12	402	85.8
pseaer_s	713135-2-20-s-R10-Guppy-HAC-Medaka-2.0	Guppy	R10	HAC	med2.0	5707253	6516803	14	66.24	6064	118	922.7	12	410	88.5
pseaer_s	713135-2-20-s-R10-Guppy-SUP	Guppy	R10	SUP	med1.7	5707133	6511397	11	66.27	5990	69	942.1	12	127	93.8
pseaer_s	713135-2-20-s-R10-Guppy-SUP-flye	Guppy	R10	SUP	flye	5707137	6511403	13	66.27	5988	73	942.5	12	131	93.7
pseaer_s	713135-2-20-s-R10-Guppy-SUP-Medaka-2.0	Guppy	R10	SUP	med2.0	5707036	6511236	13	66.27	5964	63	947.7	12	128	94.9
pseaer_s	713135-2-20-s-R10-Rerio-SUP	Rerio	R10	SUP	flye	5707066	6505387	7	66.28	5966	63	948.2	12	104	94.6
pseaer_s	713135-2-20-s-R9-Dorado-FAST	Dorado	R9	FAST	med1.7	5719589	6480483	7	66.32	5945	38	954.2	12	48	97.8
pseaer_s	713135-2-20-s-R9-Dorado-FAST-flye	Dorado	R9	FAST	flye	5717449	6477954	7	66.31	6379	249	873.1	12	492	81.3
pseaer_s	713135-2-20-s-R9-Dorado-HAC	Dorado	R9	HAC	med1.7	4700381	5258869	9	79.46	7250	5	604.2	2	16	0.5
pseaer_s	713135-2-20-s-R9-Dorado-HAC-flye	Dorado	R9	HAC	flye	5718160	6478648	7	66.31	6196	164	904.1	12	540	87.6
pseaer_s	713135-2-20-s-R9-Dorado-SUP	Dorado	R9	SUP	med1.7	5719472	6480276	8	66.32	5978	69	945.5	12	291	95.3
pseaer_s	713135-2-20-s-R9-Dorado-SUP-flye	Dorado	R9	SUP	flye	5723519	6490497	7	66.3	6024	65	940	12	575	95.3
pseaer_s	713135-2-20-s-R9-Guppy-FAST	Guppy	R9	FAST	med1.7	5719475	6479524	7	66.32	5968	53	948.5	12	54	96.6
pseaer_s	713135-2-20-s-R9-Guppy-FAST-flye	Guppy	R9	FAST	flye	5717040	6476593	8	66.31	6476	300	856.2	12	484	78.3
pseaer_s	713135-2-20-s-R9-Guppy-HAC	Guppy	R9	HAC	med1.7	5719739	6480720	7	66.32	5925	33	959	12	557	91.4
pseaer_s	713135-2-20-s-R9-Guppy-HAC-flye	Guppy	R9	HAC	flye	5718695	6479525	7	66.31	6108	116	921.4	12	245	98.3
pseaer_s	713135-2-20-s-R9-Guppy-SUP	Guppy	R9	SUP	med1.7	5719721	6480444	14	66.32	5889	14	964.8	12	274	99.1
pseaer_s	713135-2-20-s-R9-Guppy-SUP-flye	Guppy	R9	SUP	flye	5719243	6479887	7	66.31	5927	43	954.7	12	543	96.8
pseaer_s	713135-2-20-s-srp-R10-Dorado-FAST	Dorado	R10	FAST	srp	5706733	6516234	13	66.26	5909	11	966.7	12	0	99.8
pseaer_s	713135-2-20-s-srp-R10-Dorado-HAC	Dorado	R10	HAC	srp	5706736	6510918	13	66.27	5903	9	967.4	12	0	99.8
pseaer_s	713135-2-20-s-srp-R10-Dorado-SUP	Dorado	R10	SUP	srp	5706736	6510906	15	66.27	5905	9	967.2	12	0	99.8
pseaer_s	713135-2-20-s-srp-R10-Guppy-FAST	Guppy	R10	FAST	srp	5706735	6519008	14	66.25	5914	13	966.4	12	0	99.8
pseaer_s	713135-2-20-s-srp-R10-Guppy-HAC	Guppy	R10	HAC	srp	5706742	6516242	13	66.26	5910	8	967.1	12	0	99.8
pseaer_s	713135-2-20-s-srp-R10-Guppy-SUP	Guppy	R10	SUP	srp	5706744	6510932	11	66.27	5906	9	967	12	0	99.8
pseaer_s	713135-2-20-s-srp-R10-Rerio-SUP	Rerio	R10	SUP	srp	5706736	6505000	7	66.29	5905	8	966.1	12	0	99.8
pseaer_s	713135-2-20-s-srp-R9-Dorado-FAST	Dorado	R9	FAST	srp	5719720	6480623	7	66.32	5885	9	967	12	0	99.8
pseaer_s	713135-2-20-s-srp-R9-Dorado-HAC	Dorado	R9	HAC	srp	4706059	5264547	7	79.33	7457	78	613.9	2	8	2.0
pseaer_s	713135-2-20-s-srp-R9-Dorado-SUP	Dorado	R9	SUP	srp	5719718	6480555	8	66.32	5886	10	966.6	12	0	99.8
pseaer_s	713135-2-20-s-srp-R9-Guppy-FAST	Guppy	R9	FAST	srp	5719663	6479731	7	66.33	5886	10	966.6	12	0	99.8
pseaer_s	713135-2-20-s-srp-R9-Guppy-HAC	Guppy	R9	HAC	srp	5719740	6480708	7	66.32	5890	8	966	12	0	99.8
pseaer_s	713135-2-20-s-srp-R9-Guppy-SUP	Guppy	R9	SUP	srp	5719749	6480463		66.32	5887	7	966.6	12	0	99.8
staaur	ATCC25923_illumina	Illumina	Illumina	Illumina	Illumina	188134	2761715	53	32.71	2551	5	856.6	4	0	97.2
staaur	ATCC25923_lrp_R10_Dorado_FAST	Dorado	R10	FAST	lrp	2778371	2805861	2	32.85	2576	4	863.9	19	0	97.2
staaur	ATCC25923_lrp_R10_Dorado_HAC	Dorado	R10	HAC	lrp	2778355	2805845	2	32.85	2576	4	864	19	0	97.2
staaur	ATCC25923_lrp_R10_Dorado_SUP	Dorado	R10	SUP	lrp	2778355	2805845	2	32.85	2576	4	864	19	0	97.2
staaur	ATCC25923_lrp_R10_Guppy_FAST	Guppy	R10	FAST	lrp	2778290	2805780	2	32.85	2577	4	863.7	19	0	97.2
staaur	ATCC25923_lrp_R10_Guppy_HAC	Guppy	R10	HAC	lrp	2778401	2805891	2	32.85	2576	4	863.8	19	0	97.2
staaur	ATCC25923_lrp_R10_Guppy_SUP	Guppy	R10	SUP	lrp	2778357	2805847	2	32.85	2575	4	864.3	19	0	97.2
staaur	ATCC25923_lrp_R10_Rerio_SUP	Rerio	R10	SUP	lrp	2778357	2805847	2	32.85	2575	4	864.3	19	0	97.2
staaur	ATCC25923_lrp_R9_Dorado_FAST	Dorado	R9	FAST	lrp	2767295	2800511	11	32.82	2575	4	863.7	16	0	97.2
staaur	ATCC25923_lrp_R9_Dorado_HAC	Dorado	R9	HAC	lrp	2777919	2805409	2	32.85	2577	4	863.4	19	0	97.2
staaur	ATCC25923_lrp_R9_Dorado_SUP	Dorado	R9	SUP	lrp	2777919	2805409	2	32.85	2577	4	863.4	19	0	97.2
staaur	ATCC25923_lrp_R9_Guppy_FAST	Guppy	R9	FAST	lrp	2778463	2805953	2	32.85	2575	4	864.1	19	0	97.2
staaur	ATCC25923_lrp_R9_Guppy_HAC	Guppy	R9	HAC	lrp	2778243	2805733	2	32.85	2575	4	864.1	19	0	97.2
staaur	ATCC25923_lrp_R9_Guppy_SUP	Guppy	R9	SUP	lrp	2778387	2805877	2	32.85	2575	4	864.2	19	0	97.2
staaur	ATCC25923_R10_Dorado_FAST	Dorado	R10	FAST	med1.7	2778737	2806225	2	32.86	2651	32	840.1	19	15	93.3
staaur	ATCC25923_R10_Dorado_FAST_flye	Dorado	R10	FAST	flye	2777615	2805073	2	32.84	3093	256	713.8	19	152	71.4
staaur	ATCC25923_R10_Dorado_FAST_medaka_2_0	Dorado	R10	FAST	med2.0	2777794	2805261	2	32.86	3016	199	734.7	19	44	75.3
staaur	ATCC25923_R10_Dorado_HAC	Dorado	R10	HAC	med1.7	2778850	2806340	2	32.85	2578	4	862.6	19	27	96.8
staaur	ATCC25923_R10_Dorado_HAC_flye	Dorado	R10	HAC	flye	2778826	2806316	2	32.85	2586	6	860	19	93	96.5
staaur	ATCC25923_R10_Dorado_HAC_medaka_2_0	Dorado	R10	HAC	med2.0	2778848	2806338	2	32.86	2577	4	863	19	1	96.9
staaur	ATCC25923_R10_Dorado_SUP	Dorado	R10	SUP	med1.7	2778857	2806347	2	32.85	2577	4	863.6	19	66	97.0
staaur	ATCC25923_R10_Dorado_SUP_flye	Dorado	R10	SUP	flye	2778852	2806342	2	32.85	2576	4	863.9	19	94	96.9
staaur	ATCC25923_R10_Dorado_SUP_medaka_2_0	Dorado	R10	SUP	med2.0	2778857	2806347	2	32.86	2576	4	864	19	0	97.0
staaur	ATCC25923_R10_Guppy_FAST	Guppy	R10	FAST	med1.7	2778707	2833662	2	32.83	2675	33	839.3	19	10	93.4
staaur	ATCC25923_R10_Guppy_FAST_flye	Guppy	R10	FAST	flye	2777573	2832483	2	32.82	3126	221	712.4	19	153	70.0
staaur	ATCC25923_R10_Guppy_FAST_medaka_2_0	Guppy	R10	FAST	med2.0	2777801	2832703	2	32.84	3042	204	735.3	19	42	74.6
staaur	ATCC25923_R10_Guppy_HAC	Guppy	R10	HAC	med1.7	2778890	2833874	2	32.83	2611	5	860	19	25	96.8
staaur	ATCC25923_R10_Guppy_HAC_flye	Guppy	R10	HAC	flye	2778893	2833871	2	32.83	2619	8	857.6	19	82	96.4
staaur	ATCC25923_R10_Guppy_HAC_medaka_2_0	Guppy	R10	HAC	med2.0	2778857	2833825	2	32.83	2610	6	860.6	19	1	97.0
staaur	ATCC25923_R10_Guppy_SUP	Guppy	R10	SUP	med1.7	2778860	2806350	2	32.85	2576	5	863.4	19	71	97.0
staaur	ATCC25923_R10_Guppy_SUP_flye	Guppy	R10	SUP	flye	2778853	2806343	2	32.85	2579	5	862.3	19	84	96.9
staaur	ATCC25923_R10_Guppy_SUP_medaka_2_0	Guppy	R10	SUP	med2.0	2778858	2806347	2	32.86	2577	6	863.1	19	0	97.0
staaur	ATCC25923_R10_Rerio_SUP	Rerio	R10	SUP	flye	2778852	2806342	2	32.85	2576	4	863.4	19	45	97.1
staaur	ATCC25923_R9_Dorado_FAST	Dorado	R9	FAST	med1.7	1531283	2799380	5	32.85	2665	49	834.6	18	5	93.3
staaur	ATCC25923_R9_Dorado_FAST_flye	Dorado	R9	FAST	flye	1530705	2798353	5	32.85	2914	152	759.1	18	45	78.6
staaur	ATCC25923_R9_Dorado_HAC	Dorado	R9	HAC	med1.7	1535910	2813183	7	32.84	2628	19	849.3	18	8	95.8
staaur	ATCC25923_R9_Dorado_HAC_flye	Dorado	R9	HAC	flye	1535927	2812835	7	32.84	2725	53	817.9	18	31	89.1
staaur	ATCC25923_R9_Dorado_SUP	Dorado	R9	SUP	med1.7	1536023	2813229	7	32.84	2609	10	855.1	18	11	96.2
staaur	ATCC25923_R9_Dorado_SUP_flye	Dorado	R9	SUP	flye	1535864	2813012	7	32.84	2652	19	841.2	18	23	93.9
staaur	ATCC25923_R9_Guppy_FAST	Guppy	R9	FAST	med1.7	1535931	2814005	8	32.84	2704	55	825.1	18	3	92.3
staaur	ATCC25923_R9_Guppy_FAST_flye	Guppy	R9	FAST	flye	1535162	2812462	8	32.85	3087	205	716.6	18	44	71.5
staaur	ATCC25923_R9_Guppy_HAC	Guppy	R9	HAC	med1.7	1536108	2814293	8	32.84	2834	117	787.5	18	32	85.5
staaur	ATCC25923_R9_Guppy_HAC_flye	Guppy	R9	HAC	flye	1535800	2812742	7	32.84	2690	37	828.8	18	33	91.6
staaur	ATCC25923_R9_Guppy_SUP	Guppy	R9	SUP	med1.7	1535720	2812845	7	32.84	2826	97	787.9	18	28	84.4
staaur	ATCC25923_R9_Guppy_SUP_flye	Guppy	R9	SUP	flye	1535891	2812741	7	32.84	2618	8	851.8	18	23	95.8
staaur	ATCC25923_refseq	Reference	Reference	Reference	Reference	2778854	2806345	2	32.86	2577	5	863.8	19	0	97.2
staaur	ATCC25923_srp_R10_Dorado_FAST	Dorado	R10	FAST	srp	2778860	2806350	2	32.86	2575	4	864.4	19	0	97.2
staaur	ATCC25923_srp_R10_Dorado_HAC	Dorado	R10	HAC	srp	2778861	2806351	2	32.86	2575	4	863.7	19	0	97.2
staaur	ATCC25923_srp_R10_Dorado_SUP	Dorado	R10	SUP	srp	2778858	2806348	2	32.86	2576	4	864.1	19	0	97.2
staaur	ATCC25923_srp_R10_Guppy_FAST	Guppy	R10	FAST	srp	2778854	2833833	2	32.83	2604	4	862.7	19	0	97.2
staaur	ATCC25923_srp_R10_Guppy_HAC	Guppy	R10	HAC	srp	2778888	2833869	2	32.83	2606	4	862	19	0	97.2
staaur	ATCC25923_srp_R10_Guppy_SUP	Guppy	R10	SUP	srp	2778860	2806350	2	32.86	2575	4	863.8	19	0	97.2
staaur	ATCC25923_srp_R10_Rerio_SUP	Rerio	R10	SUP	srp	2778857	2806347	2	32.86	2575	4	863.8	19	0	97.2
staaur	ATCC25923_srp_R9_Dorado_FAST	Dorado	R9	FAST	srp	1531290	2799369	5	32.85	2565	4	866	18	0	97.2
staaur	ATCC25923_srp_R9_Dorado_HAC	Dorado	R9	HAC	srp	1535871	2813113	7	32.84	2587	5	862.5	18	0	97.2
staaur	ATCC25923_srp_R9_Dorado_SUP	Dorado	R9	SUP	srp	1536039	2813242	7	32.84	2585	4	863.2	18	0	97.2
staaur	ATCC25923_srp_R9_Guppy_FAST	Guppy	R9	FAST	srp	1535979	2814062	8	32.84	2586	4	863.3	18	0	97.2
staaur	ATCC25923_srp_R9_Guppy_HAC	Guppy	R9	HAC	srp	1536027	2814154	8	32.84	2587	4	862.7	18	0	97.2
staaur	ATCC25923_srp_R9_Guppy_SUP	Guppy	R9	SUP	srp	1536011	2813293	7	32.84	2586	6	862.9	18	0	97.2
staaur	ATCC25923-R10-Dorado-SUP-5kHz-med-2.0	Dorado-5kHz	R10	SUP5kHz	5kHz-med2.0	2778858	2806348	2	32.86	2575	4	863.7	19	0	97.2
staaur	ATCC25923-R10-Dorado-SUP-5kHz-med-2.0	Dorado-5kHz	R10	SUP5kHz	5kHz-flye	2778857	2806347	2	32.86	2575	4	863.7	19	1	97.2
staaur_r	803198-22-r-illumina	Illumina	Illumina	Illumina	Illumina	425675	2732165	36	32.69	2499	5	866.3	5	0	98.9
staaur_r	803198-22-r-lrp-R10-Dorado-FAST	Dorado	R10	FAST	lrp	2747034	2766793	2	32.85	2502	5	872.5	19	0	98.9
staaur_r	803198-22-r-lrp-R10-Dorado-HAC	Dorado	R10	HAC	lrp	2747034	2766793	2	32.85	2502	5	872.5	19	0	98.9
staaur_r	803198-22-r-lrp-R10-Dorado-SUP	Dorado	R10	SUP	lrp	2747034	2766793	2	32.85	2502	5	872.5	19	0	98.9
staaur_r	803198-22-r-lrp-R10-Guppy-FAST	Guppy	R10	FAST	lrp	2746809	2766568	2	32.85	2502	5	872.5	19	0	98.9
staaur_r	803198-22-r-lrp-R10-Guppy-HAC	Guppy	R10	HAC	lrp	2747034	2766793	2	32.85	2502	5	872.5	19	0	98.9
staaur_r	803198-22-r-lrp-R10-Guppy-SUP	Guppy	R10	SUP	lrp	2747034	2766793	2	32.85	2502	5	872.5	19	0	98.9
staaur_r	803198-22-r-lrp-R10-Rerio-SUP	Rerio	R10	SUP	lrp	2746807	2766566	2	32.85	2503	5	872.2	19	0	98.9
staaur_r	803198-22-r-lrp-R9-Dorado-FAST	Dorado	R9	FAST	lrp	2747076	2766835	2	32.85	2503	5	872.1	19	0	98.9
staaur_r	803198-22-r-lrp-R9-Dorado-HAC	Dorado	R9	HAC	lrp	2747076	2766835	2	32.85	2503	5	872.1	19	0	98.9
staaur_r	803198-22-r-lrp-R9-Dorado-SUP	Dorado	R9	SUP	lrp	2746389	2766148	2	32.85	2502	7	872.2	19	0	98.9
staaur_r	803198-22-r-lrp-R9-Guppy-FAST	Guppy	R9	FAST	lrp	2747139	2766898	2	32.85	2502	5	872.5	19	0	98.9
staaur_r	803198-22-r-lrp-R9-Guppy-HAC	Guppy	R9	HAC	lrp	2747097	2766856	2	32.85	2502	5	872.5	19	0	98.9
staaur_r	803198-22-r-lrp-R9-Guppy-SUP	Guppy	R9	SUP	lrp	2746139	2765898	2	32.85	2502	5	872	19	0	98.9
staaur_r	803198-22-r-R10-Dorado-FAST	Dorado	R10	FAST	med1.7	2746996	2786510	2	32.82	2557	15	858.6	19	5	97.2
staaur_r	803198-22-r-R10-Dorado-FAST-flye	Dorado	R10	FAST	flye	2746297	2785785	2	32.81	2821	132	776	19	73	83.0
staaur_r	803198-22-r-R10-Dorado-FAST-Medaka-2.0	Dorado	R10	FAST	med2.0	2746297	2785785	2	32.81	2821	132	776	19	73	83.0
staaur_r	803198-22-r-R10-Dorado-HAC	Dorado	R10	HAC	med1.7	2747020	2766779	2	32.85	2503	6	872.1	19	1	98.9
staaur_r	803198-22-r-R10-Dorado-HAC-flye	Dorado	R10	HAC	flye	2747023	2786541	2	32.82	2528	6	868.1	19	3	98.7
staaur_r	803198-22-r-R10-Dorado-HAC-Medaka-2.0	Dorado	R10	HAC	med2.0	2747018	2766777	2	32.85	2504	6	871.8	19	1	98.9
staaur_r	803198-22-r-R10-Dorado-SUP	Dorado	R10	SUP	med1.7	2747021	2766780	2	32.85	2504	6	871.8	19	1	98.9
staaur_r	803198-22-r-R10-Dorado-SUP-flye	Dorado	R10	SUP	flye	2747019	2766778	2	32.85	2505	6	871.4	19	2	98.8
staaur_r	803198-22-r-R10-Dorado-SUP-Medaka-2.0	Dorado	R10	SUP	med2.0	2747020	2766779	2	32.85	2502	5	872.4	19	0	98.9
staaur_r	803198-22-r-R10-Guppy-FAST	Guppy	R10	FAST	med1.7	2747003	2766761	2	32.85	2517	13	866.8	19	5	97.6
staaur_r	803198-22-r-R10-Guppy-FAST-flye	Guppy	R10	FAST	flye	2746278	2766015	2	32.85	2785	122	780.9	19	50	82.9
staaur_r	803198-22-r-R10-Guppy-FAST-Medaka-2.0	Guppy	R10	FAST	med2.0	2746568	2766314	2	32.85	2688	87	811.3	19	26	87.8
staaur_r	803198-22-r-R10-Guppy-HAC	Guppy	R10	HAC	med1.7	2747018	2766777	2	32.85	2507	8	870.6	19	1	98.7
staaur_r	803198-22-r-R10-Guppy-HAC-flye	Guppy	R10	HAC	flye	2747007	2766766	2	32.85	2504	7	871.2	19	5	98.7
staaur_r	803198-22-r-R10-Guppy-HAC-Medaka-2.0	Guppy	R10	HAC	med2.0	2747016	2766775	2	32.85	2506	7	870.9	19	1	98.7
staaur_r	803198-22-r-R10-Guppy-SUP	Guppy	R10	SUP	med1.7	2747022	2786540	2	32.82	2527	6	868.6	19	0	98.8
staaur_r	803198-22-r-R10-Guppy-SUP-flye	Guppy	R10	SUP	flye	2747021	2786539	2	32.82	2527	6	868.6	19	0	98.9
staaur_r	803198-22-r-R10-Guppy-SUP-Medaka-2.0	Guppy	R10	SUP	med2.0	2747019	2786537	2	32.82	2526	6	869	19	0	98.9
staaur_r	803198-22-r-R10-Rerio-SUP	Rerio	R10	SUP	flye	2747017	2786535	2	32.82	2526	5	868.6	19	0	98.9
staaur_r	803198-22-r-R9-Dorado-FAST	Dorado	R9	FAST	med1.7	2745140	2764898	2	32.84	2512	8	869.6	18	0	98.5
staaur_r	803198-22-r-R9-Dorado-HAC	Dorado	R9	HAC	med1.7	2745274	2765032	2	32.84	2588	36	845.3	18	1	94.6
staaur_r	803198-22-r-R9-Dorado-HAC-flye	Dorado	R9	HAC	flye	2744553	2764300	2	32.84	2712	98	800.3	18	7	85.9
staaur_r	803198-22-r-R9-Dorado-SUP	Dorado	R9	SUP	med1.7	2745065	2764821	2	32.84	2537	19	859.9	18	2	97.2
staaur_r	803198-22-r-R9-Dorado-SUP-flye	Dorado	R9	SUP	flye	2744872	2764623	2	32.84	2621	54	831	18	13	91.6
staaur_r	803198-22-r-R9-Dorado0-FAST-flye	Dorado	R9	FAST	flye	2743404	2763133	2	32.85	3081	265	702.2	18	10	68.4
staaur_r	803198-22-r-R9-Guppy-FAST	Guppy	R9	FAST	med1.7	2745123	2764882	2	32.84	2513	11	868.7	18	1	98.3
staaur_r	803198-22-r-R9-Guppy-FAST-flye	Guppy	R9	FAST	flye	2742991	2762714	2	32.86	3257	339	660.4	18	8	61.0
staaur_r	803198-22-r-R9-Guppy-HAC	Guppy	R9	HAC	med1.7	2745188	2764948	2	32.84	2507	7	871	18	0	98.6
staaur_r	803198-22-r-R9-Guppy-HAC-flye	Guppy	R9	HAC	flye	2744717	2764464	2	32.84	2659	72	817.6	18	9	89.0
staaur_r	803198-22-r-R9-Guppy-SUP	Guppy	R9	SUP	med1.7	2745175	2764935	2	32.84	2502	5	872.4	18	1	98.8
staaur_r	803198-22-r-R9-Guppy-SUP-flye	Guppy	R9	SUP	flye	2744977	2764731	2	32.84	2527	16	862.6	18	11	96.2
staaur_r	803198-22-r-srp-R10-Dorado-FAST	Dorado	R10	FAST	srp	2747018	2786536	2	32.82	2525	5	869.3	19	0	98.9
staaur_r	803198-22-r-srp-R10-Dorado-HAC	Dorado	R10	HAC	srp	2747019	2766778	2	32.85	2502	5	872.4	19	0	98.9
staaur_r	803198-22-r-srp-R10-Dorado-SUP	Dorado	R10	SUP	srp	2747019	2766778	2	32.85	2503	5	872.1	19	0	98.9
staaur_r	803198-22-r-srp-R10-Guppy-FAST	Guppy	R10	FAST	srp	2747018	2766777	2	32.85	2503	5	872	19	0	98.9
staaur_r	803198-22-r-srp-R10-Guppy-HAC	Guppy	R10	HAC	srp	2747018	2766777	2	32.85	2503	5	871.9	19	0	98.9
staaur_r	803198-22-r-srp-R10-Guppy-SUP	Guppy	R10	SUP	srp	2747019	2786537	2	32.82	2525	5	869.3	19	0	98.9
staaur_r	803198-22-r-srp-R10-Rerio-SUP	Rerio	R10	SUP	srp	2747019	2786537	2	32.82	2527	5	868.4	19	0	98.9
staaur_r	803198-22-r-srp-R9-Dorado-FAST	Dorado	R9	FAST	srp	2745153	2764912	2	32.84	2502	5	872.6	18	0	98.9
staaur_r	803198-22-r-srp-R9-Dorado-HAC	Dorado	R9	HAC	srp	2745177	2764936	2	32.84	2503	5	872	18	0	98.9
staaur_r	803198-22-r-srp-R9-Dorado-SUP	Dorado	R9	SUP	srp	2745172	2764931	2	32.84	2501	5	872.6	18	0	98.9
staaur_r	803198-22-r-srp-R9-Guppy-FAST	Guppy	R9	FAST	srp	2745159	2764918	2	32.84	2503	5	872.4	18	0	98.9
staaur_r	803198-22-r-srp-R9-Guppy-HAC	Guppy	R9	HAC	srp	2745182	2764941	2	32.84	2502	5	872.5	18	0	98.9
staaur_r	803198-22-r-srp-R9-Guppy-SUP	Guppy	R9	SUP	srp	2745180	2764939	2	32.84	2502	5	872.3	18	0	98.9
staaur_s	356644-22-s-illumina	Illumina	Illumina	Illumina	Illumina	325004	2707313	44	32.68	2485	11	861.4	4	0	97.6
staaur_s	356644-22-s-lrp-R10-Dorado-FAST	Dorado	R10	FAST	lrp	2730324	2753621	2	32.82	2515	11	867.2	19	0	97.6
staaur_s	356644-22-s-lrp-R10-Dorado-HAC	Dorado	R10	HAC	lrp	2730324	2753621	2	32.82	2515	11	867.2	19	0	97.6
staaur_s	356644-22-s-lrp-R10-Dorado-SUP	Dorado	R10	SUP	lrp	2730324	2753621	2	32.82	2515	11	867.2	19	0	97.6
staaur_s	356644-22-s-lrp-R10-Guppy-FAST	Guppy	R10	FAST	lrp	2730324	2753621	2	32.82	2515	11	867.2	19	0	97.6
staaur_s	356644-22-s-lrp-R10-Guppy-HAC	Guppy	R10	HAC	lrp	2730324	2753621	2	32.82	2515	11	867.2	19	0	97.6
staaur_s	356644-22-s-lrp-R10-Guppy-SUP	Guppy	R10	SUP	lrp	2730324	2753621	2	32.82	2515	11	867.2	19	0	97.6
staaur_s	356644-22-s-lrp-R10-Rerio-SUP	Rerio	R10	SUP	lrp	2730324	2753621	2	32.82	2515	11	867.2	19	0	97.6
staaur_s	356644-22-s-lrp-R9-Dorado-FAST	Dorado	R9	FAST	lrp	2730324	2753621	2	32.82	2515	11	867.2	19	0	97.6
staaur_s	356644-22-s-lrp-R9-Dorado-HAC	Dorado	R9	HAC	lrp	2730324	2753621	2	32.82	2515	11	867.2	19	0	97.6
staaur_s	356644-22-s-lrp-R9-Dorado-SUP	Dorado	R9	SUP	lrp	2730091	2753388	2	32.82	2515	11	867.1	19	0	97.6
staaur_s	356644-22-s-lrp-R9-Guppy-FAST	Guppy	R9	FAST	lrp	2730324	2753621	2	32.82	2515	11	867.2	19	0	97.6
staaur_s	356644-22-s-lrp-R9-Guppy-HAC	Guppy	R9	HAC	lrp	2730324	2753621	2	32.82	2515	11	867.2	19	0	97.6
staaur_s	356644-22-s-lrp-R9-Guppy-SUP	Guppy	R9	SUP	lrp	2730324	2753621	2	32.82	2515	11	867.2	19	0	97.6
staaur_s	356644-22-s-R10-Dorado-FAST	Dorado	R10	FAST	med1.7	2730292	2753588	2	32.82	2554	25	854.8	19	8	95.6
staaur_s	356644-22-s-R10-Dorado-FAST-flye	Dorado	R10	FAST	flye	2729087	2752370	2	32.81	3052	268	710.9	19	79	71.8
staaur_s	356644-22-s-R10-Dorado-FAST-Medaka-2.0	Dorado	R10	FAST	med2.0	2729087	2752370	2	32.81	3052	268	710.9	19	79	71.8
staaur_s	356644-22-s-R10-Dorado-HAC	Dorado	R10	HAC	med1.7	2730326	2730326	1	32.84	2505	16	864.5	19	3	97.3
staaur_s	356644-22-s-R10-Dorado-HAC-flye	Dorado	R10	HAC	flye	2730299	2730299	1	32.84	2506	15	863.6	19	23	96.6
staaur_s	356644-22-s-R10-Dorado-HAC-Medaka-2.0	Dorado	R10	HAC	med2.0	2730320	2730320	1	32.85	2497	12	867.1	19	2	97.4
staaur_s	356644-22-s-R10-Dorado-SUP	Dorado	R10	SUP	med1.7	2730337	2730337	1	32.84	2499	13	867.1	19	9	97.3
staaur_s	356644-22-s-R10-Dorado-SUP-flye	Dorado	R10	SUP	flye	2730320	2730320	1	32.84	2497	12	867.7	19	22	97.3
staaur_s	356644-22-s-R10-Dorado-SUP-Medaka-2.0	Dorado	R10	SUP	med2.0	2730320	2730320	1	32.85	2493	11	869.1	19	0	97.5
staaur_s	356644-22-s-R10-Guppy-FAST	Guppy	R10	FAST	med1.7	2730294	2753590	2	32.82	2536	23	860	19	5	96.2
staaur_s	356644-22-s-R10-Guppy-FAST-flye	Guppy	R10	FAST	flye	2729041	2752321	2	32.81	3038	260	712	19	56	69.9
staaur_s	356644-22-s-R10-Guppy-FAST-Medaka-2.0	Guppy	R10	FAST	med2.0	2729597	2752883	2	32.82	2822	149	769.6	19	14	80.2
staaur_s	356644-22-s-R10-Guppy-HAC	Guppy	R10	HAC	med1.7	2730295	2753591	2	32.82	2529	16	862.6	19	6	96.9
staaur_s	356644-22-s-R10-Guppy-HAC-flye	Guppy	R10	HAC	flye	2730279	2753575	2	32.82	2531	17	861.6	19	22	96.6
staaur_s	356644-22-s-R10-Guppy-HAC-Medaka-2.0	Guppy	R10	HAC	med2.0	2730290	2753587	2	32.82	2519	13	865.8	19	0	97.2
staaur_s	356644-22-s-R10-Guppy-SUP	Guppy	R10	SUP	med1.7	2730329	2730329	1	32.85	2496	12	868.1	19	8	97.4
staaur_s	356644-22-s-R10-Guppy-SUP-flye	Guppy	R10	SUP	flye	2730318	2730318	1	32.85	2497	12	867.6	19	14	97.2
staaur_s	356644-22-s-R10-Guppy-SUP-Medaka-2.0	Guppy	R10	SUP	med2.0	2730325	2730325	1	32.85	2496	12	868.2	19	0	97.4
staaur_s	356644-22-s-R10-Rerio-SUP	Rerio	R10	SUP	flye	2730317	2753614	2	32.82	2516	12	866.1	19	7	97.5
staaur_s	356644-22-s-R9-Dorado-FAST	Dorado	R9	FAST	med1.7	2730299	2753596	2	32.82	2531	18	861.7	19	0	96.6
staaur_s	356644-22-s-R9-Dorado-FAST-flye	Dorado	R9	FAST	flye	2728600	2751857	2	32.82	3084	265	700.4	19	27	68.0
staaur_s	356644-22-s-R9-Dorado-HAC	Dorado	R9	HAC	med1.7	2730426	2753724	2	32.81	2610	45	836.2	19	10	92.8
staaur_s	356644-22-s-R9-Dorado-HAC-flye	Dorado	R9	HAC	flye	2729709	2752992	2	32.82	2751	107	789.2	19	38	84.6
staaur_s	356644-22-s-R9-Dorado-SUP	Dorado	R9	SUP	med1.7	2730226	2753520	2	32.82	2575	34	846.6	19	9	94.7
staaur_s	356644-22-s-R9-Dorado-SUP-flye	Dorado	R9	SUP	flye	2730016	2753307	2	32.82	2631	56	827.1	19	17	90.8
staaur_s	356644-22-s-R9-Guppy-FAST	Guppy	R9	FAST	med1.7	2730307	2753605	2	32.82	2530	19	861	19	0	96.4
staaur_s	356644-22-s-R9-Guppy-FAST-flye	Guppy	R9	FAST	flye	2728122	2751373	2	32.83	3251	336	660.3	19	21	60.0
staaur_s	356644-22-s-R9-Guppy-HAC	Guppy	R9	HAC	med1.7	2730348	2753645	2	32.82	2524	17	864.2	19	2	97.0
staaur_s	356644-22-s-R9-Guppy-HAC-flye	Guppy	R9	HAC	flye	2729898	2753184	2	32.82	2670	68	814.2	19	30	88.4
staaur_s	356644-22-s-R9-Guppy-SUP	Guppy	R9	SUP	med1.7	2730364	2753661	2	32.82	2519	12	865.6	19	3	97.5
staaur_s	356644-22-s-R9-Guppy-SUP-flye	Guppy	R9	SUP	flye	2729929	2753220	2	32.82	2548	25	854.8	19	24	95.2
staaur_s	356644-22-s-srp-R10-Dorado-FAST	Dorado	R10	FAST	srp	2730325	2753622	2	32.82	2514	11	867.6	19	0	97.6
staaur_s	356644-22-s-srp-R10-Dorado-HAC	Dorado	R10	HAC	srp	2730325	2730325	1	32.85	2492	11	868.7	19	0	97.6
staaur_s	356644-22-s-srp-R10-Dorado-SUP	Dorado	R10	SUP	srp	2730327	2730327	1	32.85	2492	11	869.4	19	0	97.6
staaur_s	356644-22-s-srp-R10-Guppy-FAST	Guppy	R10	FAST	srp	2730324	2753621	2	32.82	2515	11	867.2	19	0	97.6
staaur_s	356644-22-s-srp-R10-Guppy-HAC	Guppy	R10	HAC	srp	2730303	2753600	2	32.82	2513	11	867.7	19	0	97.6
staaur_s	356644-22-s-srp-R10-Guppy-SUP	Guppy	R10	SUP	srp	2730324	2730324	1	32.85	2492	11	869.4	19	0	97.6
staaur_s	356644-22-s-srp-R10-Rerio-SUP	Rerio	R10	SUP	srp	2730326	2753623	2	32.82	2515	11	866.5	19	0	97.6
staaur_s	356644-22-s-srp-R9-Dorado-FAST	Dorado	R9	FAST	srp	2730320	2753617	2	32.82	2515	11	867.1	19	0	97.6
staaur_s	356644-22-s-srp-R9-Dorado-HAC	Dorado	R9	HAC	srp	2730322	2753619	2	32.82	2515	12	867.1	19	0	97.6
staaur_s	356644-22-s-srp-R9-Dorado-SUP	Dorado	R9	SUP	srp	2730321	2753618	2	32.82	2515	12	867.1	19	0	97.6
staaur_s	356644-22-s-srp-R9-Guppy-FAST	Guppy	R9	FAST	srp	2730323	2753620	2	32.82	2514	11	866.8	19	0	97.6
staaur_s	356644-22-s-srp-R9-Guppy-HAC	Guppy	R9	HAC	srp	2730324	2753621	2	32.82	2513	11	867.7	19	0	97.6
staaur_s	356644-22-s-srp-R9-Guppy-SUP	Guppy	R9	SUP	srp	2730360	2753657	2	32.82	2517	11	866.2	19	0	97.6
strpyo	ATCC_19615_illumina	Illumina	Illumina	Illumina	Illumina	248880	1807280	43	38.3	1755	5	854.6	3
strpyo	ATCC_19615_lrp_R10_Dorado_FAST	Dorado	R10	FAST	lrp	1844243	1844243	1	38.48	1778	5	843.6	18
strpyo	ATCC_19615_lrp_R10_Dorado_HAC	Dorado	R10	HAC	lrp	1844255	1844255	1	38.48	1778	5	843.6	18
strpyo	ATCC_19615_lrp_R10_Dorado_SUP	Dorado	R10	SUP	lrp	1844257	1844257	1	38.48	1778	5	843.6	18
strpyo	ATCC_19615_lrp_R10_Guppy_FAST	Guppy	R10	FAST	lrp	1844236	1844236	1	38.48	1778	5	843.6	18
strpyo	ATCC_19615_lrp_R10_Guppy_HAC	Guppy	R10	HAC	lrp	1844256	1844256	1	38.48	1778	5	843.6	18
strpyo	ATCC_19615_lrp_R10_Guppy_SUP	Guppy	R10	SUP	lrp	1844257	1844257	1	38.48	1778	5	843.6	18
strpyo	ATCC_19615_lrp_R10_Rerio_SUP	Rerio	R10	SUP	lrp	1844258	1844258	1	38.48	1778	5	843.6	18
strpyo	ATCC_19615_lrp_R9_Dorado_FAST	Dorado	R9	FAST	lrp	1844252	1844252	1	38.48	1778	5	843.6	18
strpyo	ATCC_19615_lrp_R9_Dorado_HAC	Dorado	R9	HAC	lrp	1844257	1844257	1	38.48	1778	5	843.6	18
strpyo	ATCC_19615_lrp_R9_Dorado_SUP	Dorado	R9	SUP	lrp	1844258	1844258	1	38.48	1778	5	843.6	18
strpyo	ATCC_19615_lrp_R9_Guppy_FAST	Guppy	R9	FAST	lrp	1844256	1844256	1	38.48	1778	5	843.6	18
strpyo	ATCC_19615_lrp_R9_Guppy_HAC	Guppy	R9	HAC	lrp	1844256	1844256	1	38.48	1778	5	843.6	18
strpyo	ATCC_19615_lrp_R9_Guppy_SUP	Guppy	R9	SUP	lrp	1844256	1844256	1	38.48	1778	5	843.6	18
strpyo	ATCC_19615_R10_Dorado_FAST_flye	Dorado	R10	FAST	flye	1844150	1844150	1	38.48	2260	221	661.4	18
strpyo	ATCC_19615_R10_Dorado_FAST_medaka_2_0	Dorado	R10	FAST	med2.0	1844230	1844230	1	38.49	2184	193	683.9	18
strpyo	ATCC_19615_R10_Dorado_FAST	Dorado	R10	FAST	med1.7	1844885	1844885	1	38.49	1899	68	790.8	18
strpyo	ATCC_19615_R10_Dorado_HAC_flye	Dorado	R10	HAC	flye	1845026	1845026	1	38.48	1803	17	832.4	18
strpyo	ATCC_19615_R10_Dorado_HAC_medaka_2_0	Dorado	R10	HAC	med2.0	1845046	1845046	1	38.48	1786	12	840	18
strpyo	ATCC_19615_R10_Dorado_HAC	Dorado	R10	HAC	med1.7	1845043	1845043	1	38.48	1795	12	836	18
strpyo	ATCC_19615_R10_Dorado_SUP_flye	Dorado	R10	SUP	flye	1845046	1851165	2	38.52	1789	8	835.8	21
strpyo	ATCC_19615_R10_Dorado_SUP_medaka_2_0	Dorado	R10	SUP	med2.0	1845055	1851076	2	38.52	1779	5	840.3	21
strpyo	ATCC_19615_R10_Dorado_SUP	Dorado	R10	SUP	med1.7	1845055	1851146	2	38.52	1785	5	837.7	21
strpyo	ATCC_19615_R10_Guppy_FAST_flye	Guppy	R10	FAST	flye	1843963	1843963	1	38.49	2322	238	643.4	18
strpyo	ATCC_19615_R10_Guppy_FAST_medaka_2_0	Guppy	R10	FAST	med2.0	1844059	1844059	1	38.5	2263	241	659.9	18
strpyo	ATCC_19615_R10_Guppy_FAST	Guppy	R10	FAST	med1.7	1844818	1844818	1	38.49	1911	68	783.5	18
strpyo	ATCC_19615_R10_Guppy_HAC_flye	Guppy	R10	HAC	flye	1845021	1845021	1	38.48	1802	19	832.6	18
strpyo	ATCC_19615_R10_Guppy_HAC_medaka_2_0	Guppy	R10	HAC	med2.0	1845037	1845037	1	38.48	1785	10	840.2	18
strpyo	ATCC_19615_R10_Guppy_HAC	Guppy	R10	HAC	med1.7	1845040	1845040	1	38.48	1795	12	835.8	18
strpyo	ATCC_19615_R10_Guppy_SUP_flye	Guppy	R10	SUP	flye	1845057	1851210	2	38.52	1783	7	838.5	21
strpyo	ATCC_19615_R10_Guppy_SUP_medaka_2_0	Guppy	R10	SUP	med2.0	1845053	1851216	2	38.52	1780	7	839.9	21
strpyo	ATCC_19615_R10_Guppy_SUP	Guppy	R10	SUP	med1.7	1845055	1851215	2	38.52	1783	7	838.5	21
strpyo	ATCC_19615_R10_Rerio_SUP	Rerio	R10	SUP	flye	1845051	1845051	1	38.48	1784	5	841.1	18
strpyo	ATCC_19615_R9_Dorado_FAST_flye	Dorado	R9	FAST	flye	1844053	1850203	2	38.53	2118	151	703.3	21
strpyo	ATCC_19615_R9_Dorado_FAST	Dorado	R9	FAST	med1.7	1845113	1851295	2	38.52	1843	32	811.9	21
strpyo	ATCC_19615_R9_Dorado_HAC_flye	Dorado	R9	HAC	flye	1844551	1844551	1	38.49	1954	75	766.2	18
strpyo	ATCC_19615_R9_Dorado_HAC	Dorado	R9	HAC	med1.7	1845050	1845050	1	38.48	1801	19	833	18
strpyo	ATCC_19615_R9_Dorado_SUP_flye	Dorado	R9	SUP	flye	1844775	1850915	2	38.52	1875	47	796.1	21
strpyo	ATCC_19615_R9_Dorado_SUP	Dorado	R9	SUP	med1.7	1845016	1851186	2	38.52	1795	13	833	21
strpyo	ATCC_19615_R9_Guppy_FAST_flye	Guppy	R9	FAST	flye	1843736	1843736	1	38.5	2218	194	669.3	18
strpyo	ATCC_19615_R9_Guppy_FAST	Guppy	R9	FAST	med1.7	1845114	1845114	1	38.48	1827	35	821.7	18
strpyo	ATCC_19615_R9_Guppy_HAC_flye	Guppy	R9	HAC	flye	1844726	1850880	2	38.52	1898	56	786.9	21
strpyo	ATCC_19615_R9_Guppy_HAC	Guppy	R9	HAC	med1.7	1845088	1851242	2	38.52	1788	11	835.4	21
strpyo	ATCC_19615_R9_Guppy_SUP_flye	Guppy	R9	SUP	flye	1844869	1844869	1	38.48	1831	22	819.5	18
strpyo	ATCC_19615_R9_Guppy_SUP	Guppy	R9	SUP	med1.7	1845039	1845039	1	38.48	1786	9	840.1	18
strpyo	ATCC_19615_srp_R10_Dorado_FAST	Dorado	R10	FAST	srp	1845056	1845056	1	38.48	1778	5	843.7	18
strpyo	ATCC_19615_srp_R10_Dorado_HAC	Dorado	R10	HAC	srp	1845057	1845057	1	38.48	1778	5	843.7	18
strpyo	ATCC_19615_srp_R10_Dorado_SUP	Dorado	R10	SUP	srp	1845056	1851126	2	38.52	1778	5	840.8	21
strpyo	ATCC_19615_srp_R10_Guppy_FAST	Guppy	R10	FAST	srp	1845053	1845053	1	38.48	1778	5	843.7	18
strpyo	ATCC_19615_srp_R10_Guppy_HAC	Guppy	R10	HAC	srp	1845056	1845056	1	38.48	1778	5	843.7	18
strpyo	ATCC_19615_srp_R10_Guppy_SUP	Guppy	R10	SUP	srp	1845055	1851207	2	38.52	1778	5	840.8	21
strpyo	ATCC_19615_srp_R10_Rerio_SUP	Rerio	R10	SUP	srp	1845056	1845056	1	38.48	1778	5	843.7	18
strpyo	ATCC_19615_srp_R9_Dorado_FAST	Dorado	R9	FAST	srp	1845057	1851224	2	38.52	1778	5	840.8	21
strpyo	ATCC_19615_srp_R9_Dorado_HAC	Dorado	R9	HAC	srp	1845058	1845058	1	38.48	1778	5	843.7	18
strpyo	ATCC_19615_srp_R9_Dorado_SUP	Dorado	R9	SUP	srp	1845055	1851206	2	38.52	1778	5	840.8	21
strpyo	ATCC_19615_srp_R9_Guppy_FAST	Guppy	R9	FAST	srp	1845053	1845053	1	38.48	1778	5	843.7	18
strpyo	ATCC_19615_srp_R9_Guppy_HAC	Guppy	R9	HAC	srp	1845058	1851212	2	38.52	1777	5	840.9	21
strpyo	ATCC_19615_srp_R9_Guppy_SUP	Guppy	R9	SUP	srp	1845056	1845056	1	38.48	1778	5	843.7	18
strpyo	NZ_CP008926.1	Reference	Reference	Reference	Reference	1844804	1844804	1	38.48	1787	9	838.7	18
strpyo	ATCC19615-R10-Dorado-SUP-5kHz-med-2.0	Dorado-5kHz	R10	SUP5kHz	5kHz-med2.0	1311555	1838631	2	38.45	1777	5	844	15
strpyo	ATCC19615-R10-Dorado-SUP-5kHz-med-2.0	Dorado-5kHz	R10	SUP5kHz	5kHz-flye	1311555	1838631	2	38.45	1777	5	844	15

## Sheet: Mean_depth
Species	Flowcell	Basecaller	Mode	Mean_read_depth
acibau_nr	R9	Guppy	FAST	132
acibau_nr	R9	Guppy	HAC	150
acibau_nr	R9	Guppy	SUP	153
acibau_nr	R9	Dorado	FAST	133
acibau_nr	R9	Dorado	HAC	152
acibau_nr	R9	Dorado	SUP	155
acibau_nr	R10	Guppy	FAST	29
acibau_nr	R10	Guppy	HAC	35
acibau_nr	R10	Guppy	SUP	37
acibau_nr	R10	Dorado	FAST	31
acibau_nr	R10	Dorado	HAC	36
acibau_nr	R10	Dorado	SUP	38
acibau_nr	R10	Rerio	SUP	36
acibau_nr	Illumina	Illumina	Illumina	124
acibau_r	R9	Guppy	FAST	40
acibau_r	R9	Guppy	HAC	46
acibau_r	R9	Guppy	SUP	47
acibau_r	R9	Dorado	FAST	40
acibau_r	R9	Dorado	HAC	47
acibau_r	R9	Dorado	SUP	48
acibau_r	R10	Guppy	FAST	30
acibau_r	R10	Guppy	HAC	63
acibau_r	R10	Guppy	SUP	68
acibau_r	R10	Dorado	FAST	32
acibau_r	R10	Dorado	HAC	65
acibau_r	R10	Dorado	SUP	68
acibau_r	R10	Rerio	SUP	65
acibau_r	Illumina	Illumina	Illumina	97.7
acipit	R9	Guppy	FAST	110
acipit	R9	Guppy	HAC	129
acipit	R9	Guppy	SUP	125
acipit	R9	Dorado	FAST	106
acipit	R9	Dorado	HAC	128
acipit	R9	Dorado	SUP	132
acipit	R10	Guppy	FAST	23
acipit	R10	Guppy	HAC	31
acipit	R10	Guppy	SUP	33
acipit	R10	Dorado	FAST	24
acipit	R10	Dorado	HAC	30
acipit	R10	Dorado	SUP	31
acipit	R10	Rerio	SUP	31
acipit	Illumina	Illumina	Illumina	77.2
entfae_r	R9	Guppy	FAST	465
entfae_r	R9	Guppy	HAC	490
entfae_r	R9	Guppy	SUP	503
entfae_r	R9	Dorado	FAST	469
entfae_r	R9	Dorado	HAC	525
entfae_r	R9	Dorado	SUP	520
entfae_r	R10	Guppy	FAST	191
entfae_r	R10	Guppy	HAC	232
entfae_r	R10	Guppy	SUP	243
entfae_r	R10	Dorado	FAST	197
entfae_r	R10	Dorado	HAC	238
entfae_r	R10	Dorado	SUP	237
entfae_r	R10	Rerio	SUP	246
entfae_r	Illumina	Illumina	Illumina	213.6
entfae_s	R9	Guppy	FAST	404
entfae_s	R9	Guppy	HAC	452
entfae_s	R9	Guppy	SUP	449
entfae_s	R9	Dorado	FAST	408
entfae_s	R9	Dorado	HAC	452
entfae_s	R9	Dorado	SUP	460
entfae_s	R10	Guppy	FAST	206
entfae_s	R10	Guppy	HAC	255
entfae_s	R10	Guppy	SUP	278
entfae_s	R10	Dorado	FAST	221
entfae_s	R10	Dorado	HAC	267
entfae_s	R10	Dorado	SUP	261
entfae_s	R10	Rerio	SUP	261
entfae_s	Illumina	Illumina	Illumina	183.1
esccol_r	R9	Guppy	FAST	138
esccol_r	R9	Guppy	HAC	161
esccol_r	R9	Guppy	SUP	166
esccol_r	R9	Dorado	FAST	145
esccol_r	R9	Dorado	HAC	171
esccol_r	R9	Dorado	SUP	172
esccol_r	R10	Guppy	FAST	54
esccol_r	R10	Guppy	HAC	73
esccol_r	R10	Guppy	SUP	74
esccol_r	R10	Dorado	FAST	59
esccol_r	R10	Dorado	HAC	73
esccol_r	R10	Dorado	SUP	74
esccol_r	R10	Rerio	SUP	74
esccol_r	Illumina	Illumina	Illumina	78.7
esccol_s	R9	Guppy	FAST	159
esccol_s	R9	Guppy	HAC	178
esccol_s	R9	Guppy	SUP	183
esccol_s	R9	Dorado	FAST	156
esccol_s	R9	Dorado	HAC	192
esccol_s	R9	Dorado	SUP	197
esccol_s	R10	Guppy	FAST	48
esccol_s	R10	Guppy	HAC	136
esccol_s	R10	Guppy	SUP	143
esccol_s	R10	Dorado	FAST	50
esccol_s	R10	Dorado	HAC	139
esccol_s	R10	Dorado	SUP	144
esccol_s	R10	Rerio	SUP	141
esccol_s	Illumina	Illumina	Illumina	89
klepne_s	R9	Guppy	FAST	68
klepne_s	R9	Guppy	HAC	78
klepne_s	R9	Guppy	SUP	81
klepne_s	R9	Dorado	FAST	70
klepne_s	R9	Dorado	HAC	80
klepne_s	R9	Dorado	SUP	82
klepne_s	R10	Guppy	FAST	40
klepne_s	R10	Guppy	HAC	52
klepne_s	R10	Guppy	SUP	54
klepne_s	R10	Dorado	FAST	45
klepne_s	R10	Dorado	HAC	54
klepne_s	R10	Dorado	SUP	55
klepne_s	R10	Rerio	SUP	54
klepne_s	Illumina	Illumina	Illumina	101.5
pseaer_r	R9	Guppy	FAST	186
pseaer_r	R9	Guppy	HAC	212
pseaer_r	R9	Guppy	SUP	214
pseaer_r	R9	Dorado	FAST	191
pseaer_r	R9	Dorado	HAC	217
pseaer_r	R9	Dorado	SUP	222
pseaer_r	R10	Guppy	FAST	69
pseaer_r	R10	Guppy	HAC	82
pseaer_r	R10	Guppy	SUP	85
pseaer_r	R10	Dorado	FAST	74
pseaer_r	R10	Dorado	HAC	84
pseaer_r	R10	Dorado	SUP	85
pseaer_r	R10	Rerio	SUP	85
pseaer_r	Illumina	Illumina	Illumina	77.6
pseaer_s	R9	Guppy	FAST	153
pseaer_s	R9	Guppy	HAC	174
pseaer_s	R9	Guppy	SUP	179
pseaer_s	R9	Dorado	FAST	160
pseaer_s	R9	Dorado	HAC	179
pseaer_s	R9	Dorado	SUP	180
pseaer_s	R10	Guppy	FAST	76
pseaer_s	R10	Guppy	HAC	90
pseaer_s	R10	Guppy	SUP	92
pseaer_s	R10	Dorado	FAST	80
pseaer_s	R10	Dorado	HAC	90
pseaer_s	R10	Dorado	SUP	92
pseaer_s	R10	Rerio	SUP	90
pseaer_s	Illumina	Illumina	Illumina	62
staaur_r	R9	Guppy	FAST	341
staaur_r	R9	Guppy	HAC	376
staaur_r	R9	Guppy	SUP	381
staaur_r	R9	Dorado	FAST	339
staaur_r	R9	Dorado	HAC	380
staaur_r	R9	Dorado	SUP	385
staaur_r	R10	Guppy	FAST	137
staaur_r	R10	Guppy	HAC	163
staaur_r	R10	Guppy	SUP	164
staaur_r	R10	Dorado	FAST	138
staaur_r	R10	Dorado	HAC	162
staaur_r	R10	Dorado	SUP	159
staaur_r	R10	Rerio	SUP	163
staaur_r	Illumina	Illumina	Illumina	210.9
staaur_s	R9	Guppy	FAST	320
staaur_s	R9	Guppy	HAC	349
staaur_s	R9	Guppy	SUP	358
staaur_s	R9	Dorado	FAST	346
staaur_s	R9	Dorado	HAC	361
staaur_s	R9	Dorado	SUP	364
staaur_s	R10	Guppy	FAST	416
staaur_s	R10	Guppy	HAC	481
staaur_s	R10	Guppy	SUP	533
staaur_s	R10	Dorado	FAST	450
staaur_s	R10	Dorado	HAC	501
staaur_s	R10	Dorado	SUP	534
staaur_s	R10	Rerio	SUP	530
staaur_s	Illumina	Illumina	Illumina	145.8
bursta	R9	Guppy	FAST	249
bursta	R9	Guppy	HAC	280
bursta	R9	Guppy	SUP	291
bursta	R9	Dorado	FAST	250
bursta	R9	Dorado	HAC	293
bursta	R9	Dorado	SUP	288
bursta	R10	Guppy	FAST	22
bursta	R10	Guppy	HAC	33
bursta	R10	Guppy	SUP	35
bursta	R10	Dorado	FAST	28
bursta	R10	Dorado	HAC	35
bursta	R10	Dorado	SUP	37
bursta	R10	Rerio	SUP	36
bursta	Illumina	Illumina	Illumina	194
camjej	R9	Guppy	FAST	224
camjej	R9	Guppy	HAC	253
camjej	R9	Guppy	SUP	257
camjej	R9	Dorado	FAST	220
camjej	R9	Dorado	HAC	259
camjej	R9	Dorado	SUP	262
camjej	R10	Guppy	FAST	219
camjej	R10	Guppy	HAC	244
camjej	R10	Guppy	SUP	252
camjej	R10	Dorado	FAST	230
camjej	R10	Dorado	HAC	249
camjej	R10	Dorado	SUP	254
camjej	R10	Rerio	SUP	249
camjej	Illumina	Illumina	Illumina	1494.7
entfael	R9	Guppy	FAST	315
entfael	R9	Guppy	HAC	372
entfael	R9	Guppy	SUP	369
entfael	R9	Dorado	FAST	309
entfael	R9	Dorado	HAC	357
entfael	R9	Dorado	SUP	361
entfael	R10	Guppy	FAST	216
entfael	R10	Guppy	HAC	266
entfael	R10	Guppy	SUP	283
entfael	R10	Dorado	FAST	225
entfael	R10	Dorado	HAC	274
entfael	R10	Dorado	SUP	284
entfael	R10	Rerio	SUP	280
entfael	Illumina	Illumina	Illumina	679.1
esccol	R9	Guppy	FAST	146
esccol	R9	Guppy	HAC	170
esccol	R9	Guppy	SUP	175
esccol	R9	Dorado	FAST	146
esccol	R9	Dorado	HAC	177
esccol	R9	Dorado	SUP	179
esccol	R10	Guppy	FAST	124
esccol	R10	Guppy	HAC	294
esccol	R10	Guppy	SUP	324
esccol	R10	Dorado	FAST	138
esccol	R10	Dorado	HAC	307
esccol	R10	Dorado	SUP	326
esccol	R10	Rerio	SUP	311
esccol	Illumina	Illumina	Illumina	310.8
klequa	R9	Guppy	FAST	179
klequa	R9	Guppy	HAC	210
klequa	R9	Guppy	SUP	218
klequa	R9	Dorado	FAST	184
klequa	R9	Dorado	HAC	214
klequa	R9	Dorado	SUP	217
klequa	R10	Guppy	FAST	37
klequa	R10	Guppy	HAC	50
klequa	R10	Guppy	SUP	52
klequa	R10	Dorado	FAST	41
klequa	R10	Dorado	HAC	51
klequa	R10	Dorado	SUP	53
klequa	R10	Rerio	SUP	52
klequa	Illumina	Illumina	Illumina	321.7
pseaer	R9	Guppy	FAST	124
pseaer	R9	Guppy	HAC	143
pseaer	R9	Guppy	SUP	150
pseaer	R9	Dorado	FAST	126
pseaer	R9	Dorado	HAC	150
pseaer	R9	Dorado	SUP	152
pseaer	R10	Guppy	FAST	35
pseaer	R10	Guppy	HAC	43
pseaer	R10	Guppy	SUP	44
pseaer	R10	Dorado	FAST	34
pseaer	R10	Dorado	HAC	39
pseaer	R10	Dorado	SUP	40
pseaer	R10	Rerio	SUP	40
pseaer	Illumina	Illumina	Illumina	216.9
staaur	R9	Guppy	FAST	56
staaur	R9	Guppy	HAC	63
staaur	R9	Guppy	SUP	64
staaur	R9	Dorado	FAST	55
staaur	R9	Dorado	HAC	64
staaur	R9	Dorado	SUP	65
staaur	R10	Guppy	FAST	78
staaur	R10	Guppy	HAC	114
staaur	R10	Guppy	SUP	130
staaur	R10	Dorado	FAST	81
staaur	R10	Dorado	HAC	124
staaur	R10	Dorado	SUP	131
staaur	R10	Rerio	SUP	126
staaur	Illumina	Illumina	Illumina	623.7
strpyo	R9	Guppy	FAST	104
strpyo	R9	Guppy	HAC	111
strpyo	R9	Guppy	SUP	114
strpyo	R9	Dorado	FAST	104
strpyo	R9	Dorado	HAC	113
strpyo	R9	Dorado	SUP	114
strpyo	R10	Guppy	FAST	36
strpyo	R10	Guppy	HAC	44
strpyo	R10	Guppy	SUP	46
strpyo	R10	Dorado	FAST	39
strpyo	R10	Dorado	HAC	45
strpyo	R10	Dorado	SUP	46
strpyo	R10	Rerio	SUP	45
strpyo	Illumina	Illumina	Illumina	349.3
bursta	R10	Dorado	SUP-5kHz	77
camjej	R10	Dorado	SUP-5kHz	707
entfael	R10	Dorado	SUP-5kHz	632
esccol	R10	Dorado	SUP-5kHz	261
klequa	R10	Dorado	SUP-5kHz	149
pseaer	R10	Dorado	SUP-5kHz	350
staaur	R10	Dorado	SUP-5kHz	119
strpyo	R10	Dorado	SUP-5kHz	20
