# Supplementary material for: Benchmarking Illumina and Oxford Nanopore Technologies (ONT) sequencing platforms for whole genome sequencing of bacterial genomes and use in clinical microbiology
Source: Research Square preprint supplement (doi:10.21203/rs.3.rs-7036422/v1), 2025-07-10
Supplement: Supplementary file 5 [file f0ad34f4adb8c4080d82b2c8.xlsx]

## Sheet: Read_me
Sheet	Description
Sheet 2	Read quality metrics
Headers	Description
Sample	short name of bacterial isolate used
Number_of_bases	Total number of passed bases from ONT
N50	Read length N50 (bp) for ONT
Mean_qual	Mean base quality
Flowcell	Flow cell chemistry used for ONT sequencing
Basecaller	Basecaller used for ONT basecalling
Mode	Basecalling model used
mean_quality	Mean base quality for Illumina
Total_reads	Total number of reads sequenced from Illumina sequencing

## Sheet: Read_quality_metrics
Sample	Number_of_bases	N50	Mean_qual	Flowcell	Basecaller	Mode			Sample	mean_quality	Total_reads	Basecaller
entfael	2020063756	5471	20.2	R10.4.1	Dorado-5kHz	SUP			acibau_nr	36.2939	3481678	Illumina
staaur	411282508	4636	19.8	R10.4.1	Dorado-5kHz	SUP			acibau_r	36.3105	2647808	Illumina
camjej	1419696980	4979	19.6	R10.4.1	Dorado-5kHz	SUP			acipit_s	36.2344	2010566	Illumina
esccol	1537236444	4732	19.5	R10.4.1	Dorado-5kHz	SUP			bursta	33.0089	5577758	Illumina
pseaer	2529813579	11706	19.5	R10.4.1	Dorado-5kHz	SUP			camjej	33.3356	16135498	Illumina
klequa	876131860	6808	19.4	R10.4.1	Dorado-5kHz	SUP			entfae_r	36.4137	4252846	Illumina
bursta	847582948	5536	18.9	R10.4.1	Dorado-5kHz	SUP			entfae_s	36.2579	3606232	Illumina
staaur_r	452209958	6686	16.9	R10.4.1	Guppy	SUP			entfael	33.143	13612210	Illumina
acibau_nr	169023066	8890	16.8	R10.4.1	Guppy	SUP			esccol	33.2176	10643758	Illumina
pseaer_s	601234546	9277	16.6	R10.4.1	Guppy	SUP			esccol_r	36.0095	2742270	Illumina
pseaer_r	609893460	7861	16.5	R10.4.1	Guppy	SUP			esccol_s	36.1116	2981344	Illumina
pseaer_s	602376362	9392	16.5	R10.4.1	Dorado	SUP			klepne_s	35.728	3657710	Illumina
staaur_r	453246786	6716	16.5	R10.4.1	Dorado	SUP			klequa	32.9385	11706776	Illumina
pseaer_r	611318883	7916	16.4	R10.4.1	Dorado	SUP			pseaer	33.0493	9776050	Illumina
acibau_nr	168646545	9239	16.3	R10.4.1	Dorado	SUP			pseaer_r	35.9773	3597762	Illumina
staaur_s	1403371364	4005	16.3	R10.4.1	Guppy	SUP			pseaer_s	35.4888	2671836	Illumina
staaur_r	448225317	6713	16.2	R10.4.1	Rerio	SUP			staaur	33.3509	11484050	Illumina
pseaer_s	593894389	9407	16.1	R10.4.1	Rerio	SUP			staaur_r	36.2627	3841238	Illumina
acipit_s	141885896	8216	16	R10.4.1	Guppy	SUP			staaur_s	36.3171	2631626	Illumina
pseaer	282172266	10603	16	R10.4.1	Guppy	SUP			strpyo	33.2203	12093470	Illumina
pseaer_r	603950142	7927	16	R10.4.1	Rerio	SUP
acibau_nr	164881029	9184	15.9	R10.4.1	Rerio	SUP
pseaer	284200978	10599	15.9	R10.4.1	Dorado	SUP
staaur_s	1406366581	4017	15.9	R10.4.1	Dorado	SUP
entfae_r	878594845	4413	15.7	R10.4.1	Guppy	SUP
klepne_s	302521111	5109	15.7	R10.4.1	Dorado	SUP
klepne_s	299823690	5112	15.6	R10.4.1	Guppy	SUP
staaur_s	1388419895	4008	15.6	R10.4.1	Rerio	SUP
acipit_s	142103027	8414	15.5	R10.4.1	Dorado	SUP
klequa	296821439	8852	15.5	R10.4.1	Dorado	SUP
pseaer	281520176	10637	15.5	R10.4.1	Rerio	SUP
strpyo	43500633	6974	15.5	R10.4.1	Dorado-5kHz	SUP
entfael	824159608	7457	15.4	R10.4.1	Guppy	SUP
strpyo	211793670	7289	15.4	R9.4.1	Guppy	SUP
entfae_r	854598086	4444	15.3	R10.4.1	Dorado	SUP
entfae_s	848931616	3409	15.3	R10.4.1	Guppy	SUP
klequa	294748607	8820	15.3	R10.4.1	Guppy	SUP
acipit_s	137677818	8357	15.2	R10.4.1	Rerio	SUP
esccol_r	467077295	4402	15.2	R10.4.1	Dorado	SUP
klepne_s	298179418	5112	15.2	R10.4.1	Rerio	SUP
entfael	827260083	7581	15.1	R10.4.1	Dorado	SUP
esccol_r	464124928	4393	15.1	R10.4.1	Guppy	SUP
klequa	292056073	8868	15.1	R10.4.1	Rerio	SUP
staaur_r	991083814	3466	15.1	R9.4.1	Guppy	SUP
strpyo	85735881	3988	15.1	R10.4.1	Guppy	SUP
acipit_s	549348187	7697	15	R9.4.1	Guppy	SUP
entfae_s	852705848	3399	15	R10.4.1	Dorado	SUP
strpyo	213590148	7397	15	R9.4.1	Dorado	SUP
acibaur	297962950	6994	14.9	R10.4.1	Guppy	SUP
entfae_r	860960129	4424	14.9	R10.4.1	Rerio	SUP
staaur	360168112	5583	14.9	R10.4.1	Guppy	SUP
staaur_r	445845025	6701	14.9	R10.4.1	Dorado	HAC
staaur_s	1072044141	2377	14.9	R9.4.1	Guppy	SUP
entfael	808548537	7532	14.8	R10.4.1	Rerio	SUP
esccol_s	788284474	6167	14.8	R10.4.1	Guppy	SUP
esccol_s	791469355	6211	14.8	R10.4.1	Dorado	SUP
strpyo	86681587	3958	14.8	R10.4.1	Dorado	SUP
camjej	433718516	5256	14.7	R10.4.1	Guppy	SUP
esccol_r	458592695	4403	14.7	R10.4.1	Rerio	SUP
staaur	177055490	4104	14.7	R9.4.1	Guppy	SUP
strpyo	209347393	7271	14.7	R9.4.1	Guppy	HAC
acibau_nr	164045116	9158	14.6	R10.4.1	Dorado	HAC
entfae_s	836226481	3390	14.6	R10.4.1	Rerio	SUP
staaur_r	441577538	6661	14.6	R10.4.1	Guppy	HAC
acibau_nr	654057924	3244	14.5	R9.4.1	Guppy	SUP
acibaur	298213211	7192	14.5	R10.4.1	Dorado	SUP
acipit_s	552636529	7971	14.5	R9.4.1	Dorado	SUP
bursta	383954143	6165	14.5	R10.4.1	Guppy	SUP
entfae_r	1645768276	2534	14.5	R9.4.1	Guppy	SUP
pseaer_s	590250270	9374	14.5	R10.4.1	Dorado	HAC
staaur_r	1000773873	3512	14.5	R9.4.1	Dorado	SUP
staaur_s	1380127265	4000	14.5	R10.4.1	Dorado	HAC
acibau_nr	162999702	8828	14.4	R10.4.1	Guppy	HAC
bursta	2596860546	4569	14.4	R9.4.1	Guppy	SUP
camjej	435640701	5241	14.4	R10.4.1	Dorado	SUP
entfae_s	1400082838	2473	14.4	R9.4.1	Guppy	SUP
esccol_s	777981216	6215	14.4	R10.4.1	Rerio	SUP
pseaer_r	600775880	7906	14.4	R10.4.1	Dorado	HAC
staaur	362467458	5547	14.4	R10.4.1	Dorado	SUP
staaur_r	976008619	3450	14.4	R9.4.1	Guppy	HAC
staaur_s	1084973076	2410	14.4	R9.4.1	Dorado	SUP
strpyo	210727732	7408	14.4	R9.4.1	Dorado	HAC
strpyo	85645811	3995	14.4	R10.4.1	Rerio	SUP
acipit_s	535018635	7602	14.3	R9.4.1	Guppy	HAC
esccol	1741913699	5488	14.3	R10.4.1	Guppy	SUP
staaur_s	1053883726	2367	14.3	R9.4.1	Guppy	HAC
acibaur	286885872	7064	14.2	R10.4.1	Rerio	SUP
bursta	387069744	6171	14.2	R10.4.1	Dorado	SUP
esccol	1757443097	5498	14.2	R10.4.1	Dorado	SUP
klepne_s	423070499	5441	14.2	R9.4.1	Guppy	SUP
pseaer_s	1165532242	3106	14.2	R9.4.1	Guppy	SUP
staaur	179510733	4125	14.2	R9.4.1	Dorado	SUP
staaur_s	1364181782	3985	14.2	R10.4.1	Guppy	HAC
entfae_r	1622741786	2518	14.1	R9.4.1	Guppy	HAC
entfael	1057487057	2991	14.1	R9.4.1	Guppy	SUP
pseaer_r	1534762812	3114	14.1	R9.4.1	Guppy	SUP
staaur	173849118	4085	14.1	R9.4.1	Guppy	HAC
staaur	349504794	5562	14.1	R10.4.1	Rerio	SUP
staaur_r	989019429	3511	14.1	R9.4.1	Dorado	HAC
staaur_s	1070971145	2410	14.1	R9.4.1	Dorado	HAC
acibau_nr	664226724	3300	14	R9.4.1	Dorado	SUP
acibaur	200035326	2596	14	R9.4.1	Guppy	SUP
acipit_s	544842355	7995	14	R9.4.1	Dorado	HAC
acipit_s	136402962	8328	14	R10.4.1	Dorado	HAC
bursta	2622214956	4608	14	R9.4.1	Dorado	SUP
entfae_r	1676059733	2552	14	R9.4.1	Dorado	SUP
entfae_s	1428363823	2489	14	R9.4.1	Dorado	SUP
entfae_s	1379633490	2459	14	R9.4.1	Guppy	HAC
esccol_r	916708133	2779	14	R9.4.1	Guppy	SUP
pseaer	1029718444	5050	14	R9.4.1	Guppy	SUP
pseaer_s	584178227	9199	14	R10.4.1	Guppy	HAC
acibau_nr	641437319	3226	13.9	R9.4.1	Guppy	HAC
bursta	377874790	6184	13.9	R10.4.1	Rerio	SUP
camjej	428204005	5245	13.9	R10.4.1	Rerio	SUP
entfae_r	856489726	4411	13.9	R10.4.1	Dorado	HAC
esccol	893339194	2810	13.9	R9.4.1	Guppy	SUP
esccol_s	925647717	3222	13.9	R9.4.1	Guppy	SUP
klepne_s	426475615	5495	13.9	R9.4.1	Dorado	SUP
klequa	1181505940	3771	13.9	R9.4.1	Guppy	SUP
pseaer	279015047	10612	13.9	R10.4.1	Dorado	HAC
pseaer_r	593554059	7844	13.9	R10.4.1	Guppy	HAC
acipit_s	134744107	8043	13.8	R10.4.1	Guppy	HAC
entfae_r	1647669501	2551	13.8	R9.4.1	Dorado	HAC
esccol	1696570817	5515	13.8	R10.4.1	Rerio	SUP
esccol_r	929730691	2790	13.8	R9.4.1	Dorado	SUP
pseaer_s	1173844511	3122	13.8	R9.4.1	Dorado	SUP
staaur	176918555	4135	13.8	R9.4.1	Dorado	HAC
acibau_nr	652769456	3301	13.7	R9.4.1	Dorado	HAC
bursta	2549866044	4562	13.7	R9.4.1	Guppy	HAC
entfae_r	842032085	4377	13.7	R10.4.1	Guppy	HAC
entfae_s	1402293606	2488	13.7	R9.4.1	Dorado	HAC
entfae_s	832381553	3380	13.7	R10.4.1	Dorado	HAC
entfael	1074653245	2994	13.7	R9.4.1	Dorado	SUP
klepne_s	295125318	5086	13.7	R10.4.1	Dorado	HAC
pseaer_r	1547596991	3109	13.7	R9.4.1	Dorado	SUP
acibaur	204782437	2620	13.6	R9.4.1	Dorado	SUP
acibaur	195461668	2585	13.6	R9.4.1	Guppy	HAC
camjej	439010803	3205	13.6	R9.4.1	Guppy	SUP
entfael	1037920913	2976	13.6	R9.4.1	Guppy	HAC
esccol_s	941109691	3237	13.6	R9.4.1	Dorado	SUP
pseaer	1034989968	5108	13.6	R9.4.1	Dorado	SUP
esccol	909225795	2813	13.5	R9.4.1	Dorado	SUP
klepne_s	412360896	5406	13.5	R9.4.1	Guppy	HAC
pseaer	273529603	10600	13.5	R10.4.1	Guppy	HAC
bursta	2589315192	4613	13.4	R9.4.1	Dorado	HAC
camjej	432997309	3190	13.4	R9.4.1	Guppy	HAC
entfae_s	816965626	3402	13.4	R10.4.1	Guppy	HAC
esccol_r	896383246	2762	13.4	R9.4.1	Guppy	HAC
esccol_r	454354456	4379	13.4	R10.4.1	Dorado	HAC
klequa	1195741048	3798	13.4	R9.4.1	Dorado	SUP
pseaer_s	1136710454	3090	13.4	R9.4.1	Guppy	HAC
acibaur	200395623	2622	13.3	R9.4.1	Dorado	HAC
camjej	447454270	3239	13.3	R9.4.1	Dorado	SUP
entfael	1058711467	2995	13.3	R9.4.1	Dorado	HAC
esccol	868728962	2790	13.3	R9.4.1	Guppy	HAC
esccol_s	901296914	3220	13.3	R9.4.1	Guppy	HAC
klequa	287738059	8825	13.3	R10.4.1	Dorado	HAC
pseaer	1000021549	5023	13.3	R9.4.1	Guppy	HAC
pseaer_r	1496760919	3091	13.3	R9.4.1	Guppy	HAC
camjej	441913525	3249	13.2	R9.4.1	Dorado	HAC
entfael	798254048	7504	13.2	R10.4.1	Dorado	HAC
esccol_r	917420019	2789	13.2	R9.4.1	Dorado	HAC
klepne_s	420501227	5496	13.2	R9.4.1	Dorado	HAC
klepne_s	288278350	5115	13.2	R10.4.1	Guppy	HAC
klequa	1147686300	3754	13.2	R9.4.1	Guppy	HAC
pseaer_s	1161590516	3120	13.2	R9.4.1	Dorado	HAC
strpyo	84538515	3958	13.2	R10.4.1	Dorado	HAC
entfael	783864608	7405	13.1	R10.4.1	Guppy	HAC
esccol	894175647	2813	13.1	R9.4.1	Dorado	HAC
pseaer_r	1531165447	3107	13.1	R9.4.1	Dorado	HAC
staaur	343698012	5540	13.1	R10.4.1	Dorado	HAC
strpyo	82494505	4008	13.1	R10.4.1	Guppy	HAC
acibaur	284015511	7022	13	R10.4.1	Dorado	HAC
camjej	420716830	5275	13	R10.4.1	Guppy	HAC
camjej	427163990	5237	13	R10.4.1	Dorado	HAC
esccol_s	926766271	3236	13	R9.4.1	Dorado	HAC
pseaer	1023266189	5111	13	R9.4.1	Dorado	HAC
staaur	335419882	5615	13	R10.4.1	Guppy	HAC
esccol_r	444070602	4392	12.9	R10.4.1	Guppy	HAC
esccol_s	763379611	6180	12.9	R10.4.1	Dorado	HAC
klequa	281899911	8760	12.9	R10.4.1	Guppy	HAC
strpyo	193121342	7305	12.9	R9.4.1	Guppy	FAST
acibaur	276515295	6804	12.8	R10.4.1	Guppy	HAC
klequa	1177580641	3800	12.8	R9.4.1	Dorado	HAC
bursta	367005285	6162	12.7	R10.4.1	Dorado	HAC
staaur_r	886597213	3453	12.7	R9.4.1	Guppy	FAST
acipit_s	454834026	7405	12.6	R9.4.1	Guppy	FAST
staaur_s	949917601	2369	12.6	R9.4.1	Guppy	FAST
entfae_r	1470935161	2527	12.5	R9.4.1	Guppy	FAST
entfae_s	1248164196	2480	12.5	R9.4.1	Guppy	FAST
esccol	1653435773	5475	12.5	R10.4.1	Dorado	HAC
staaur	155085692	4127	12.5	R9.4.1	Guppy	FAST
acibau_nr	568430753	3227	12.4	R9.4.1	Guppy	FAST
bursta	352727885	6193	12.4	R10.4.1	Guppy	HAC
esccol_s	743125378	6168	12.4	R10.4.1	Guppy	HAC
strpyo	192692333	7455	12.4	R9.4.1	Dorado	FAST
entfael	921119605	3009	12.3	R9.4.1	Guppy	FAST
esccol	1595582455	5546	12.3	R10.4.1	Guppy	HAC
acibaur	169924948	2607	12.2	R9.4.1	Guppy	FAST
camjej	380804319	3176	12.2	R9.4.1	Guppy	FAST
staaur_r	877379084	3517	12.1	R9.4.1	Dorado	FAST
acipit_s	457165693	7738	12	R9.4.1	Dorado	FAST
bursta	2261434446	4593	12	R9.4.1	Guppy	FAST
staaur_s	937900878	2414	12	R9.4.1	Dorado	FAST
entfae_r	1472417558	2550	11.9	R9.4.1	Dorado	FAST
esccol_r	783102365	2795	11.9	R9.4.1	Guppy	FAST
klepne_s	362255776	5449	11.9	R9.4.1	Guppy	FAST
staaur	150840083	4186	11.9	R9.4.1	Dorado	FAST
acibau_nr	573412814	3286	11.8	R9.4.1	Dorado	FAST
entfae_s	1251178004	2486	11.8	R9.4.1	Dorado	FAST
esccol	739078549	2804	11.8	R9.4.1	Guppy	FAST
esccol_s	771971399	3235	11.8	R9.4.1	Guppy	FAST
pseaer_r	1316412643	3109	11.8	R9.4.1	Guppy	FAST
pseaer_s	1001950556	3109	11.8	R9.4.1	Guppy	FAST
klequa	984330768	3784	11.7	R9.4.1	Guppy	FAST
pseaer	862167302	5051	11.7	R9.4.1	Guppy	FAST
acibaur	170378631	2644	11.6	R9.4.1	Dorado	FAST
camjej	373613319	3248	11.6	R9.4.1	Dorado	FAST
entfael	913948203	3025	11.6	R9.4.1	Dorado	FAST
bursta	2231314798	4680	11.4	R9.4.1	Dorado	FAST
esccol_r	797166914	2799	11.3	R9.4.1	Dorado	FAST
klepne_s	367194721	5517	11.3	R9.4.1	Dorado	FAST
esccol	740459242	2840	11.2	R9.4.1	Dorado	FAST
esccol_s	782719005	3242	11.2	R9.4.1	Dorado	FAST
pseaer_r	1346445100	3119	11.2	R9.4.1	Dorado	FAST
pseaer_s	1023063631	3136	11.2	R9.4.1	Dorado	FAST
klequa	988119437	3827	11.1	R9.4.1	Dorado	FAST
pseaer	870298713	5141	11.1	R9.4.1	Dorado	FAST
staaur_r	384870349	6748	10.9	R10.4.1	Guppy	FAST
staaur_s	1165119070	4089	10.8	R10.4.1	Guppy	FAST
acibau_nr	135222032	8729	10.7	R10.4.1	Guppy	FAST
camjej	371113093	5426	10.7	R10.4.1	Guppy	FAST
camjej	391675563	5246	10.7	R10.4.1	Dorado	FAST
staaur_r	394914159	6630	10.7	R10.4.1	Dorado	FAST
staaur_s	1211622326	3942	10.6	R10.4.1	Dorado	FAST
acibau_nr	136832476	8782	10.5	R10.4.1	Dorado	FAST
acipit_s	99491411	7886	10.5	R10.4.1	Guppy	FAST
entfae_r	672470471	4385	10.5	R10.4.1	Guppy	FAST
entfae_s	657714504	3550	10.4	R10.4.1	Guppy	FAST
entfael	622066951	7374	10.4	R10.4.1	Guppy	FAST
strpyo	67454591	4173	10.4	R10.4.1	Guppy	FAST
acipit_s	101527634	7765	10.3	R10.4.1	Dorado	FAST
entfae_r	706441114	4222	10.3	R10.4.1	Dorado	FAST
entfael	657384647	7207	10.3	R10.4.1	Dorado	FAST
pseaer	241750048	10619	10.3	R10.4.1	Dorado	FAST
pseaer_s	491357969	9335	10.3	R10.4.1	Guppy	FAST
pseaer_s	512662719	9337	10.3	R10.4.1	Dorado	FAST
strpyo	72852578	3963	10.3	R10.4.1	Dorado	FAST
entfae_s	704648815	3307	10.2	R10.4.1	Dorado	FAST
pseaer	224610783	10923	10.2	R10.4.1	Guppy	FAST
pseaer_r	489257061	8090	10.2	R10.4.1	Guppy	FAST
pseaer_r	518421272	7876	10.2	R10.4.1	Dorado	FAST
staaur	217349835	5945	10.1	R10.4.1	Guppy	FAST
klepne_s	217602775	5435	10	R10.4.1	Guppy	FAST
bursta	261072488	6070	9.9	R10.4.1	Guppy	FAST
esccol_r	320955727	4783	9.9	R10.4.1	Guppy	FAST
klepne_s	238539823	5032	9.9	R10.4.1	Dorado	FAST
klequa	210389801	9252	9.9	R10.4.1	Guppy	FAST
klequa	230283866	8760	9.9	R10.4.1	Dorado	FAST
staaur	231059971	5514	9.9	R10.4.1	Dorado	FAST
bursta	328290937	5502	9.8	R10.4.1	Dorado	FAST
esccol_r	354826409	4284	9.8	R10.4.1	Dorado	FAST
acibaur	133799008	6722	9.7	R10.4.1	Guppy	FAST
esccol	667169723	6143	9.6	R10.4.1	Guppy	FAST
acibaur	136452041	5917	9.4	R10.4.1	Dorado	FAST
esccol	750508343	5223	9.4	R10.4.1	Dorado	FAST
esccol_s	255864078	7130	9.4	R10.4.1	Guppy	FAST
esccol_s	276256363	5738	9.2	R10.4.1	Dorado	FAST
